# Supplementary material for: Brønsted acid-catalysed regiodivergent phosphorylation of 2-indolylmethanols to synthesize benzylic site or C3-phosphorylated indole derivatives
Source: Royal Society of Chemistry journal article supplement (doi:10.1039/c8ob02033g), 2018-01-01

# Brønsted Acid-Catalysed Regiodivergent Phosphorylation of 2-Indolylmethanols to Synthesize Benzylic Site or C3-Phosphorylated Indole Derivatives

Long Chen,<sup>a\*</sup> Yun-Xiang Zou,<sup>a</sup> Xin-Yue Fang,<sup>a</sup> Jie Wu<sup>a</sup> and Xiao-Hua Sun<sup>a</sup>

<sup>a</sup> Antibiotics Research and Re-evaluation Key Laboratory of Sichuan Province, Sichuan Industrial Institute of Antibiotics, Chengdu University, 168 Hua Guan Road, Chengdu 610052, P. R. China

E-mail: chenlong@cdu.edu.cn

| Table of Contents                                                                                                      |  | page   |
|------------------------------------------------------------------------------------------------------------------------|--|--------|
| 1. General information                                                                                                 |  | 2      |
| 2. General procedure for HOTs·H <sub>2</sub> O-catalyzed regioselective benzylic phosphorylation of 2-indolylmethanols |  | 3-11   |
| 3. General procedure for HOTf-catalyzed synthesis of C3-phosphorylated indoles                                         |  | 11-15  |
| 4. 1 mmol scale synthesis                                                                                              |  | 16     |
| 5. Control experiments                                                                                                 |  | 16-18  |
| 6. <sup>1</sup> H, <sup>13</sup> C, <sup>19</sup> F and <sup>31</sup> P NMR spectra                                    |  | 19-152 |

## 1. General information:

Reactions were monitored by thin layer chromatography using UV light to visualize the reaction course. Purification of reaction products were carried out by flash chromatography on silica gel. Chemical yields refer to pure isolated substances.  $^1\text{H}$  and  $^{13}\text{C}$  NMR spectra were obtained using a Bruker DPX-400 or JEOL-600 spectrometer. The  $^{31}\text{P}$  NMR spectra were recorded at JEOL 243 MHz with 85%  $\text{H}_3\text{PO}_4$  as external standard. The  $^{19}\text{F}$  NMR spectra were recorded at JEOL 564 MHz. Chemical shifts are reported in ppm from tetramethylsilane with the solvent resonance as the internal standard. The following abbreviations were used to designate chemical shift multiplicities: s = singlet, d = doublet, t = triplet, q = quartet, h = heptet, m = multiplet, br = broad.

All reactions were run under an atmosphere of air. Anhydrous THF and toluene were prepared by distillation over sodium-benzophenone ketyl prior to use. Anhydrous halogenated solvents and  $\text{CH}_3\text{CN}$  were prepared by first distillation over  $\text{P}_2\text{O}_5$  and then from  $\text{CaH}_2$ . Anhydrous ethyl acetate was prepared by first dried in anhydrous  $\text{Na}_2\text{SO}_4$  and then distilled over  $\text{P}_2\text{O}_5$  and stored over MS 4Å. Anhydrous  $\text{CH}_3\text{NO}_2$  was prepared by first dried in anhydrous  $\text{Na}_2\text{SO}_4$  and then distilled under reduced pressure. 2-Indolylmethanols **1**<sup>1</sup> and diarylphosphine oxides **2**<sup>2</sup> were prepared according to the literature report. Commercially available HOTs· $\text{H}_2\text{O}$  (4-methylbenzenesulfonic acid hydrate) and HOTf (trifluoromethanesulfonic acid) were used as received.

---

<sup>1</sup> Y.-Y. He, X.-X. Sun, G.-H. Li, G.-J. Mei, F. Shi, *J. Org. Chem.*, 2017, **82**, 2462.

<sup>2</sup> S. Molitor, J. Becker, V. H. Gessner, *J. Am. Chem. Soc.*, 2014, **136**, 15517.

## 2. General procedure for HOTs·H<sub>2</sub>O-catalyzed regioselective benzylic phosphorylation of 2-indolylmethanols

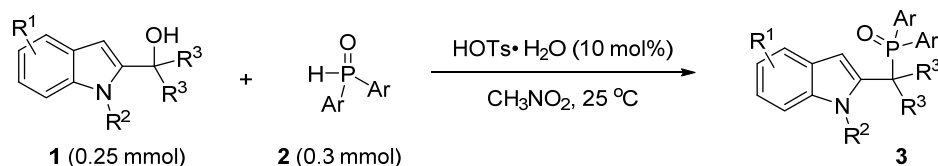

The reaction was carried out under an air atmosphere. To a 10-mL vial were added 2-indolylmethanols **1** (0.25 mmol, 1.0 equiv), Ar<sub>2</sub>P(O)H **2** (0.3 mmol, 1.2 equivs) and 2.5 mL of anhydrous CH<sub>3</sub>NO<sub>2</sub>. After adding HOTs·H<sub>2</sub>O (6.8 mg, 10 mol%), the reaction mixture was stirred at room temperature till almost full conversion of **1** by TLC analysis. The reaction mixture was directly subjected to column chromatography using petrol ether/ethyl acetate (generally 10:1 to 5:1, v:v) as the eluent to afford the desired products **3**.

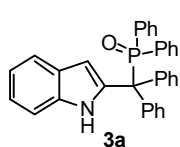

Column chromatography afforded the desired product **3a**<sup>3</sup> in 98% yield (118.3 mg) as white solid; <sup>1</sup>H NMR (600 MHz, CDCl<sub>3</sub>): δ = 10.26 (brs, 1H), 7.53-7.50 (m, 1H), 7.47-7.43 (m, 3H), 7.28-7.23 (m, 7H), 7.19-7.08 (m, 9H), 7.03-7.00 (m, 4H), 6.28 (s, 1H); <sup>13</sup>C{<sup>1</sup>H} NMR (150 MHz, CDCl<sub>3</sub>): δ = 139.0, 136.2, 132.9 (d, *J*<sub>C-P</sub> = 9.0 Hz), 132.0, 131.4, 130.9 (d, *J*<sub>C-P</sub> = 1.5 Hz), 130.8, 128.2 (d, *J*<sub>C-P</sub> = 12.0 Hz), 127.9, 127.6, 127.0, 122.1, 120.3, 119.6, 111.4, 105.7 (d, *J*<sub>C-P</sub> = 6.0 Hz), 60.9 (d, *J*<sub>C-P</sub> = 63.0 Hz); <sup>31</sup>P{<sup>1</sup>H} NMR (243 MHz, CDCl<sub>3</sub>): δ = 37.3.

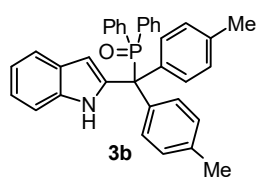

Column chromatography afforded **3b**<sup>3</sup> in 93% yield (118.8 mg) as white solid; <sup>1</sup>H NMR (600 MHz, CDCl<sub>3</sub>): δ = 10.31 (brs, 1H), 7.51-7.50 (m, 1H), 7.46-7.44 (m, 3H), 7.28-7.26 (m, 3H), 7.26-7.25 (m, 1H), 7.21-7.17 (m, 5H), 7.11-7.08 (m, 1H), 6.96-6.95 (m, 4H), 6.87-6.86 (m, 4H), 6.24 (s, 1H), 2.31 (s, 6H); <sup>13</sup>C{<sup>1</sup>H} NMR (150 MHz, CDCl<sub>3</sub>): δ = 139.3, 137.3, 136.2, 136.1, 133.0 (d, *J*<sub>C-P</sub> = 7.5 Hz), 131.9, 131.1, 130.8 (d, *J*<sub>C-P</sub> = 4.5 Hz), 128.6, 128.2 (d, *J*<sub>C-P</sub> = 4.2 Hz), 127.1, 122.0, 120.3, 119.5, 111.5, 105.6, 60.2 (d, *J*<sub>C-P</sub> = 63.0 Hz), 21.0; <sup>31</sup>P{<sup>1</sup>H} NMR (243 MHz, CDCl<sub>3</sub>): δ = 31.8.

<sup>3</sup> C. Hu, Y. He, C. Zhou, M. C. Kozlowski, L.-M. Wang, *J. Org. Chem.*, 2018, **83**, 4739.

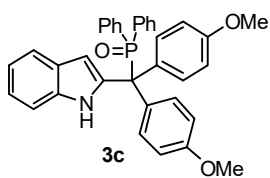

Column chromatography afforded **3c**<sup>3</sup> in 90% yield (122.7 mg) as white solid; <sup>1</sup>H NMR (400 MHz, CDCl<sub>3</sub>): δ = 10.32 (brs, 1H), 7.51-7.43 (m, 4H), 7.29-7.18 (m, 10H), 7.11-7.07 (m, 1H), 6.91-6.89 (m, 3H), 6.69-6.67 (m, 4H), 6.22 (s, 1H), 3.75 (s, 6H); <sup>13</sup>C{<sup>1</sup>H} NMR (100 MHz, CDCl<sub>3</sub>): δ = 158.7 (d, *J*<sub>C-P</sub> = 1.0 Hz), 139.4 (d, *J*<sub>C-P</sub> = 6.0 Hz), 136.2, 133.0 (d, *J*<sub>C-P</sub> = 9.0 Hz), 132.0 (m, *J*<sub>C-P</sub> = 5.0 Hz), 131.7 (1.2 Hz), 131.1, 130.8, 128.2 (d, *J*<sub>C-P</sub> = 11.0 Hz), 127.0 (d, *J*<sub>C-P</sub> = 2.0 Hz), 122.0, 120.3, 119.5, 113.1, 111.5, 105.5 (d, *J*<sub>C-P</sub> = 6.0 Hz), 59.4 (d, *J*<sub>C-P</sub> = 63.0 Hz), 55.2; <sup>31</sup>P{<sup>1</sup>H} NMR (162 MHz, CDCl<sub>3</sub>): δ = 31.8.

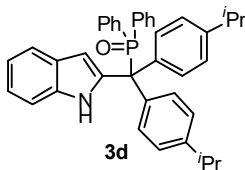

Column chromatography afforded **3d** in 74% yield (104.9 mg) as white solid; Mp: 120-122 °C; <sup>1</sup>H NMR (600 MHz, CDCl<sub>3</sub>): δ = 10.18 (brs, 1H), 7.52-7.51 (m, 1H), 7.46-7.43 (m, 3H), 7.26-7.21 (m, 5H), 7.13-7.09 (m, 5H), 7.01-7.00 (m, 4H), 6.90-6.89 (m, 4H), 6.31 (s, 1H), 2.89-2.83 (m, 2H), 1.23-1.21 (m, 12H); <sup>13</sup>C{<sup>1</sup>H} NMR (150 MHz, CDCl<sub>3</sub>): δ = 148.2, 139.2, 136.4, 136.2, 133.0 (d, *J*<sub>C-P</sub> = 9.0 Hz), 131.8, 131.7, 131.1, 130.8 (d, *J*<sub>C-P</sub> = 6.0 Hz), 128.2 (d, *J*<sub>C-P</sub> = 10.5 Hz), 127.1, 125.9, 119.5, 111.4, 105.6 (d, *J*<sub>C-P</sub> = 6.0 Hz), 60.3 (d, *J*<sub>C-P</sub> = 63.0 Hz), 33.6, 23.9, 23.8; <sup>31</sup>P{<sup>1</sup>H} NMR (243 MHz, CDCl<sub>3</sub>): δ = 37.3; HRMS (ESI): Exact mass calcd for C<sub>39</sub>H<sub>38</sub>NOP [M+H]<sup>+</sup>: 568.2764, Found: 568.2755.

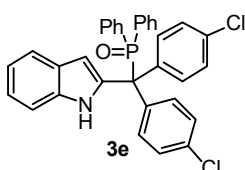

Column chromatography afforded the desired product **3e**<sup>3</sup> in 54% yield (74.4 mg) as white solid; <sup>1</sup>H NMR (600 MHz, CDCl<sub>3</sub>): δ = 10.34 (brs, 1H), 7.52-7.46 (m, 4H), 7.33-7.30 (m, 4H), 7.26-7.24 (m, 1H), 7.21-7.18 (m, 4H), 7.15-7.11 (m, 5H), 6.93-6.92 (m, 4H), 6.18 (s, 1H); <sup>13</sup>C{<sup>1</sup>H} NMR (150 MHz, CDCl<sub>3</sub>): δ = 137.4, 136.3, 133.9, 133.0 (d, *J*<sub>C-P</sub> = 7.5 Hz), 132.4, 132.2, 130.8, 130.1, 128.5 (d, *J*<sub>C-P</sub> = 12.0 Hz), 128.2, 126.9, 122.6, 120.5, 120.0, 111.6, 105.8, 59.9 (d, *J*<sub>C-P</sub> = 61.5 Hz); <sup>31</sup>P{<sup>1</sup>H} NMR (243 MHz, CDCl<sub>3</sub>): δ = 37.1.

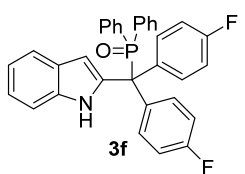

Column chromatography afforded the desired product **3f**<sup>3</sup> in 90% yield (116.8 mg) as white solid; <sup>1</sup>H NMR (600 MHz, CDCl<sub>3</sub>): δ = 10.31 (brs, 1H), 7.53-7.46 (m, 4H), 7.31-7.29 (m, 4H), 7.25-7.20 (m, 1H), 7.18-7.17 (m, 4H), 7.17-7.12 (m, 1H), 6.97-6.95 (m, 4H), 6.88-6.85 (m, 4H), 6.20 (s, 1H); <sup>13</sup>C{<sup>1</sup>H} NMR (150 MHz, CDCl<sub>3</sub>): δ = 162.0 (d, *J*<sub>C-F</sub> = 247.5 Hz), 136.3, 134.8, 132.9 (d, *J*<sub>C-P</sub> = 9.0 Hz), 132.6 (q, *J*<sub>C-P</sub> = 7.5 Hz), 132.3, 130.9, 130.3, 128.5 (d, *J*<sub>C-P</sub> = 12.0 Hz), 126.9, 122.5, 120.5, 119.9, 114.9 (d, *J*<sub>C-F</sub> = 21.0 Hz), 111.6, 105.6, 59.6 (d, *J*<sub>C-P</sub> = 61.5 Hz); <sup>31</sup>P{<sup>1</sup>H} NMR (243 MHz, CDCl<sub>3</sub>): δ = 37.3; <sup>19</sup>F{<sup>1</sup>H} NMR (565 MHz, CDCl<sub>3</sub>): δ = -113.8.

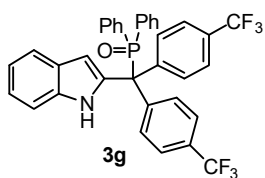

Column chromatography afforded the desired product **3g** in 28% yield (43.4 mg) as white solid; Mp: 130-132 °C;  $^1\text{H}$  NMR (600 MHz,  $\text{CDCl}_3$ ):  $\delta$  = 10.36 (brs, 1H), 7.54-7.51 (m, 3H), 7.48-7.44 (m, 5H), 7.34-7.31 (m, 4H), 7.28-7.25 (m, 1H), 7.20-7.13 (m, 9H), 6.20 (s, 1H);  $^{13}\text{C}\{^1\text{H}\}$  NMR (150 MHz,  $\text{CDCl}_3$ ):  $\delta$  = 142.8, 136.3, 132.9 (d,  $J_{\text{C-P}} = 7.5$  Hz), 132.7, 131.2 (d,  $J_{\text{C-P}} = 4.5$  Hz), 130.1 (q,  $J_{\text{C-F}} = 93.0$  Hz), 130.0 (d,  $J_{\text{C-P}} = 33.0$  Hz), 128.6 (d,  $J_{\text{C-P}} = 10.5$  Hz), 126.9, 125.0, 123.8 (q,  $J_{\text{C-F}} = 270.0$  Hz), 122.8, 120.6, 120.1, 111.6, 106.0, 60.8 (d,  $J_{\text{C-P}} = 60.0$  Hz);  $^{31}\text{P}\{^1\text{H}\}$  NMR (243 MHz,  $\text{CDCl}_3$ ):  $\delta$  = 37.4;  $^{19}\text{F}\{^1\text{H}\}$  NMR (565 MHz,  $\text{CDCl}_3$ ):  $\delta$  = -62.6; HRMS (ESI): Exact mass calcd for  $\text{C}_{35}\text{H}_{24}\text{F}_6\text{NOP}$   $[\text{M}+\text{H}]^+$ : 620.1572, Found: 620.1564.

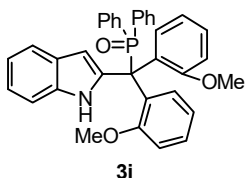

Column chromatography afforded the desired product **3i** in 62% yield (84.2 mg) as white solid; Mp: 188-190 °C;  $^1\text{H}$  NMR (400 MHz,  $\text{CDCl}_3$ ):  $\delta$  = 11.95 (s, 1H), 7.55 (d,  $J = 8.0$  Hz, 1H), 7.41 (d,  $J = 8.0$  Hz, 1H), 7.27 (brs, 5H), 7.19-7.12 (m, 7H), 7.06-7.02 (m, 2H), 6.80-6.71 (m, 4H), 6.28 (d,  $J = 8.0$  Hz, 2H), 5.66 (s, 1H), 2.99 (s, 6H);  $^{13}\text{C}\{^1\text{H}\}$  NMR (100 MHz,  $\text{CDCl}_3$ ):  $\delta$  = 156.0, 143.2 (d,  $J_{\text{C-P}} = 6.0$  Hz), 136.5, 131.4 (d,  $J_{\text{C-P}} = 8.0$  Hz), 128.8, 127.8, 120.8, 119.9, 119.1, 112.1, 110.0, 105.2 (d,  $J_{\text{C-P}} = 7.0$  Hz), 58.9 (d,  $J_{\text{C-P}} = 60.0$  Hz), 53.3;  $^{31}\text{P}\{^1\text{H}\}$  NMR (243 MHz,  $\text{CDCl}_3$ ):  $\delta$  = 51.6; HRMS (ESI): Exact mass calcd for  $\text{C}_{35}\text{H}_{30}\text{NO}_3\text{P}$   $[\text{M}+\text{H}]^+$ : 544.2036, Found: 544.2029.

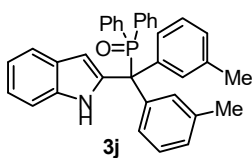

Column chromatography afforded **3j**<sup>3</sup> in 82% yield (104.8 mg) as white solid;  $^1\text{H}$  NMR (600 MHz,  $\text{CDCl}_3$ ):  $\delta$  = 10.34 (brs, 1H), 7.53-7.52 (m, 1H), 7.47-7.44 (m, 3H), 7.28-7.25 (m, 4H), 7.23-7.21 (m, 1H), 7.18-7.15 (m, 4H), 7.12-7.10 (m, 1H), 7.09-7.03 (m, 4H), 6.80-6.77 (m, 4H), 6.27 (s, 1H), 2.10 (s, 6H);  $^{13}\text{C}\{^1\text{H}\}$  NMR (150 MHz,  $\text{CDCl}_3$ ):  $\delta$  = 138.8, 137.1, 136.2, 133.1 (d,  $J_{\text{C-P}} = 7.5$  Hz), 131.9, 131.8 (d,  $J_{\text{C-P}} = 6.0$  Hz), 131.5, 130.8, 128.3, 128.1 (d,  $J_{\text{C-P}} = 4.5$  Hz), 128.0, 127.8, 127.1, 122.0, 120.4, 119.5, 105.6 (d,  $J_{\text{C-P}} = 6.0$  Hz), 60.8 (d,  $J_{\text{C-P}} = 63.0$  Hz), 21.5;  $^{31}\text{P}\{^1\text{H}\}$  NMR (243 MHz,  $\text{CDCl}_3$ ):  $\delta$  = 37.5.

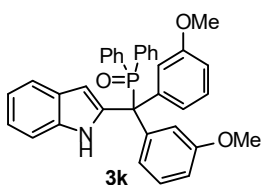

Column chromatography afforded the desired product **3k** in 56% yield (76.0 mg) as white solid; Mp: 198-200 °C;  $^1\text{H}$  NMR (600 MHz,  $\text{CDCl}_3$ ):  $\delta$  = 10.37 (brs, 1H), 7.53-7.52 (m, 1H), 7.48-7.45 (m, 3H), 7.30-7.27 (m, 4H), 7.23-7.17 (m, 5H), 7.12-7.11 (m, 1H), 7.08-7.07 (m, 2H), 6.82-6.80 (m, 2H), 6.66 (s, 2H), 6.53-6.51 (m, 2H), 6.31 (s, 1H), 3.42 (s, 6H);  $^{13}\text{C}\{^1\text{H}\}$  NMR (150 MHz,

CDCl<sub>3</sub>):  $\delta$  = 158.8, 140.4, 136.2, 133.0 (d,  $J_{C-P}$  = 7.5 Hz), 132.0, 131.7, 131.1, 128.9, 128.3 (d,  $J_{C-P}$  = 12.0 Hz), 127.0, 123.5 (d,  $J_{C-P}$  = 6.0 Hz), 122.2, 120.4, 119.6, 116.3, 113.9, 111.6, 106.0, 61.0 (d,  $J_{C-P}$  = 61.5 Hz), 54.8;  $^{31}\text{P}\{^1\text{H}\}$  NMR (243 MHz, CDCl<sub>3</sub>):  $\delta$  = 37.6; HRMS (ESI): Exact mass calcd for C<sub>35</sub>H<sub>30</sub>NO<sub>3</sub>P [M+H]<sup>+</sup>: 544.2036, Found: 544.2028.

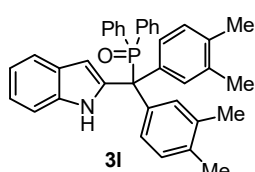

Column chromatography afforded the desired product **3l** in 86% yield (115.8 mg) as white solid; Mp: 150-152°C;  $^1\text{H}$  NMR (400 MHz, CDCl<sub>3</sub>):  $\delta$  = 10.35 (brs, 1H), 7.52-7.50 (m, 1H), 7.46-7.42 (m, 3H), 7.28-7.16 (m, 9H), 7.11-7.07 (m, 1H), 6.92-6.90 (m, 2H), 6.72 (s, 2H), 6.68-6.66 (m, 2H), 6.23 (s, 1H), 2.21 (s, 6H), 1.99 (s, 6H);  $^{13}\text{C}\{^1\text{H}\}$  NMR (100 MHz, CDCl<sub>3</sub>):  $\delta$  = 139.4, 136.2 (d,  $J_{C-P}$  = 7.0 Hz), 135.8 (d,  $J_{C-P}$  = 2.0 Hz), 135.5, 133.07 (d,  $J_{C-P}$  = 9.0 Hz), 132.2 (d,  $J_{C-P}$  = 5.0 Hz), 131.9, 131.8 (d,  $J_{C-P}$  = 2.0 Hz), 131.0, 129.1, 128.5 (d,  $J_{C-P}$  = 6.0 Hz), 128.1 (d,  $J_{C-P}$  = 11.0 Hz), 127.1, 121.9, 120.3, 119.4, 111.5, 105.5 (d,  $J_{C-P}$  = 6.0 Hz), 60.2 (d,  $J_{C-P}$  = 64.0 Hz);  $^{31}\text{P}\{^1\text{H}\}$  NMR (162 MHz, CDCl<sub>3</sub>):  $\delta$  = 37.4; HRMS (ESI): Exact mass calcd for C<sub>37</sub>H<sub>34</sub>NOP [M+H]<sup>+</sup>: 540.2451, Found: 540.2444.

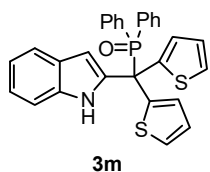

Column chromatography afforded the desired product **3m** in 59% yield (73.2 mg) as white solid; Mp: 128-130 °C;  $^1\text{H}$  NMR (400 MHz, CDCl<sub>3</sub>):  $\delta$  = 10.47 (s, 1H), 7.55-7.49 (m, 4H), 7.36-7.25 (m, 9H), 7.20-7.19 (m, 2H), 7.15-7.11 (m, 1H), 6.86-6.84 (m, 2H), 6.43 (s, 2H), 6.27 (s, 1H);  $^{13}\text{C}\{^1\text{H}\}$  NMR (100 MHz, CDCl<sub>3</sub>):  $\delta$  = 144.0, 138.6 (d,  $J_{C-P}$  = 6.0 Hz), 136.2, 133.3 (d,  $J_{C-P}$  = 9.0 Hz), 132.6 (d,  $J_{C-P}$  = 3.0 Hz), 130.0, 129.0 (d,  $J_{C-P}$  = 5.0 Hz), 128.4 (d,  $J_{C-P}$  = 12.0 Hz), 126.8 (d,  $J_{C-P}$  = 2.0 Hz), 126.4 (d,  $J_{C-P}$  = 2.0 Hz), 126.1 (d,  $J_{C-P}$  = 2.0 Hz), 122.6, 120.8, 119.8, 111.7, 105.7 (d,  $J_{C-P}$  = 5.0 Hz), 54.3 (d,  $J_{C-P}$  = 63.0 Hz);  $^{31}\text{P}\{^1\text{H}\}$  NMR (162 MHz, CDCl<sub>3</sub>):  $\delta$  = 37.7; HRMS (ESI): Exact mass calcd for C<sub>29</sub>H<sub>22</sub>NO<sub>2</sub>S<sub>2</sub> [M+H]<sup>+</sup>: 496.0953, Found: 496.0941.

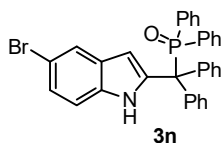

Column chromatography afforded **3n** in 85% yield (119.5 mg) as white solid; Mp: 248-250 °C;  $^1\text{H}$  NMR (600 MHz, CDCl<sub>3</sub>):  $\delta$  = 10.43 (brs, 1H), 7.63 (s, 1H), 7.48-7.45 (m, 2H), 7.32-7.27 (m, 2H), 7.27-7.26 (m, 5H), 7.18-7.13 (m, 9H), 6.99-6.98 (m, 4H), 6.24 (s, 1H);  $^{13}\text{C}\{^1\text{H}\}$  NMR (150 MHz, CDCl<sub>3</sub>):  $\delta$  = 140.4, 138.7, 134.8, 133.0 (d,  $J_{C-P}$  = 9.0 Hz), 132.1, 131.0 (d,  $J_{C-P}$  = 93.0 Hz), 130.0 (d,  $J_{C-P}$  = 4.5 Hz), 128.7, 128.3 (d,  $J_{C-P}$  = 12.0 Hz), 128.0, 127.7, 125.1, 122.8, 113.0, 112.9 (d,  $J_{C-P}$  = 15.0 Hz), 105.0 (d,  $J_{C-P}$  = 6.0 Hz), 60.8 (d,  $J_{C-P}$  = 61.5 Hz);  $^{31}\text{P}\{^1\text{H}\}$  NMR (243 MHz, CDCl<sub>3</sub>):  $\delta$  = 37.4; HRMS (ESI): Exact mass calcd for C<sub>33</sub>H<sub>25</sub>BrNOP [M+H]<sup>+</sup>: 562.0930, Found: 562.0927.

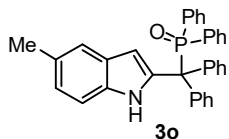

Column chromatography afforded the desired product **3o**<sup>3</sup> in 82% yield (101.8 mg) as white solid; <sup>1</sup>H NMR (600 MHz, CDCl<sub>3</sub>): δ = 10.20 (brs, 1H), 7.46-7.43 (m, 2H), 7.36-7.34 (m, 1H), 7.28-7.24 (m, 6H), 7.17-7.13 (m, 9H), 7.06-7.04 (m, 1H), 7.01-6.99 (m, 4H), 6.19 (s, 1H), 2.45 (s, 3H); <sup>13</sup>C{<sup>1</sup>H} NMR (150 MHz, CDCl<sub>3</sub>): δ = 139.1, 134.6, 133.0 (d, *J*<sub>C-P</sub> = 9.0 Hz), 132.0, 131.4, 130.9 (d, *J*<sub>C-P</sub> = 4.5 Hz), 130.8, 128.8, 128.2 (d, *J*<sub>C-P</sub> = 10.5 Hz), 127.9, 127.6, 127.3, 123.8, 120.0, 111.2, 105.3 (d, *J*<sub>C-P</sub> = 7.5 Hz), 60.9 (d, *J*<sub>C-P</sub> = 61.5 Hz); <sup>31</sup>P{<sup>1</sup>H} NMR (243 MHz, CDCl<sub>3</sub>): δ = 37.4.

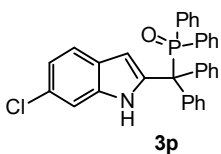

Column chromatography afforded the desired product **3p**<sup>3</sup> in 76% yield (98.2 mg) as white solid; <sup>1</sup>H NMR (400 MHz, CDCl<sub>3</sub>): δ = 10.37 (brs, 1H), 7.48-7.44 (m, 3H), 7.41-7.39 (m, 1H), 7.29-7.27 (m, 6H), 7.17-7.14 (m, 8H), 7.07-7.06 (m, 1H), 6.99-6.98 (m, 4H), 6.28 (s, 1H); <sup>13</sup>C{<sup>1</sup>H} NMR (100 MHz, CDCl<sub>3</sub>): δ = 139.9, 138.8, 136.6, 132.9 (d, *J*<sub>C-P</sub> = 8.0 Hz), 132.1 (d, *J*<sub>C-P</sub> = 2.0 Hz), 131.4, 130.9 (d, *J*<sub>C-P</sub> = 5.0 Hz), 130.4, 128.3 (d, *J*<sub>C-P</sub> = 12.0 Hz), 128.0, 127.7 (d, *J*<sub>C-P</sub> = 2.0 Hz), 125.6 (d, *J*<sub>C-P</sub> = 2.0 Hz), 121.2, 120.5, 111.4, 105.7 (d, *J*<sub>C-P</sub> = 6.0 Hz), 60.9 (d, *J*<sub>C-P</sub> = 62.0 Hz); <sup>31</sup>P{<sup>1</sup>H} NMR (162 MHz, CDCl<sub>3</sub>): δ = 37.5.

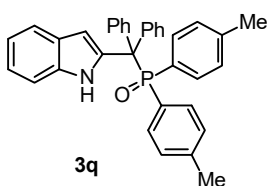

Column chromatography afforded the desired product **3q**<sup>3</sup> in 95% yield (121.4 mg) as white solid; <sup>1</sup>H NMR (600 MHz, CDCl<sub>3</sub>): δ = 10.36 (brs, 1H), 7.52-7.50 (m, 1H), 7.45-7.44 (m, 1H), 7.25-7.23 (m, 2H), 7.22-7.19 (m, 1H), 7.16-7.13 (m, 4H), 7.10-7.08 (m, 1H), 7.06-7.01 (m, 12H), 6.27 (s, 1H), 2.31 (s, 6H); <sup>13</sup>C{<sup>1</sup>H} NMR (150 MHz, CDCl<sub>3</sub>): δ = 142.4 (d, *J*<sub>C-P</sub> = 3.0 Hz), 139.3, 136.2, 133.0 (d, *J*<sub>C-P</sub> = 9.0 Hz), 131.0 (d, *J*<sub>C-P</sub> = 4.5 Hz), 128.9 (d, *J*<sub>C-P</sub> = 12.0 Hz), 128.3, 127.8, 127.7, 127.5, 127.1, 122.0, 120.3, 119.5, 111.5, 105.6, 60.8 (d, *J*<sub>C-P</sub> = 61.5 Hz), 21.5; <sup>31</sup>P{<sup>1</sup>H} NMR (243 MHz, CDCl<sub>3</sub>): δ = 37.8.

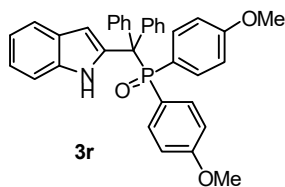

Column chromatography afforded the desired product **3r**<sup>3</sup> in 87% yield (118.2 mg) as white solid; <sup>1</sup>H NMR (400 MHz, CDCl<sub>3</sub>): δ = 10.38 (brs, 1H), 7.52 (d, *J* = 8.0 Hz, 1H), 7.46 (d, *J* = 8.0 Hz, 1H), 7.26-7.23 (m, 3H), 7.21-7.13 (m, 5H), 7.12-7.01 (m, 8H), 6.77-6.74 (m, 4H), 6.28 (s, 1H), 3.76 (s, 6H); <sup>13</sup>C{<sup>1</sup>H} NMR (100 MHz, CDCl<sub>3</sub>): δ = 162.3 (d, *J*<sub>C-P</sub> = 3.0 Hz), 139.4, 136.2, 134.7 (d, *J*<sub>C-P</sub> = 9.0 Hz), 130.9 (d, *J*<sub>C-P</sub> = 5.0 Hz), 127.8, 127.4, 127.1 (d, *J*<sub>C-P</sub> = 2.0 Hz), 122.8, 122.0, 121.8, 120.3, 119.5, 113.7 (d, *J*<sub>C-P</sub> = 13.0 Hz), 111.5, 105.5, 60.8 (d, *J*<sub>C-P</sub> = 63.0 Hz), 55.2; <sup>31</sup>P{<sup>1</sup>H} NMR (162 MHz, CDCl<sub>3</sub>): δ = 37.6.

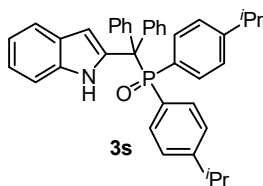

Column chromatography afforded the desired product **3s** in 84% yield (119.2 mg) as white solid; Mp: 134-136 °C;  $^1\text{H}$  NMR (600 MHz,  $\text{CDCl}_3$ ):  $\delta$  = 10.41 (brs, 1H), 7.53-7.51 (m, 1H), 7.46-7.44 (m, 1H), 7.26-7.19 (m, 3H), 7.16-7.02 (m, 17H), 6.26 (s, 1H), 2.90-2.83 (m, 2H), 1.21-1.19 (m, 12H);  $^{13}\text{C}\{^1\text{H}\}$  NMR (150 MHz,  $\text{CDCl}_3$ ):  $\delta$  = 153.0, 139.3, 136.2, 133.0 (d,  $J_{\text{C-P}}$  = 9.0 Hz), 131.0 (d,  $J_{\text{C-P}}$  = 4.5 Hz), 128.7, 128.0, 127.8, 127.4, 127.1, 126.4 (d,  $J_{\text{C-P}}$  = 12.0 Hz), 122.0, 120.3, 119.5, 111.5, 105.5, 60.7 (d,  $J_{\text{C-P}}$  = 61.5 Hz), 34.0, 23.6, 23.5;  $^{31}\text{P}\{^1\text{H}\}$  NMR (243 MHz,  $\text{CDCl}_3$ ):  $\delta$  = 37.9; HRMS (ESI): Exact mass calcd for  $\text{C}_{39}\text{H}_{38}\text{NOP}$   $[\text{M}+\text{H}]^+$ : 568.2764, Found: 568.2757.

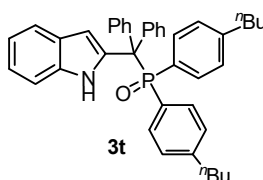

Column chromatography afforded the desired product **3t** in 88% yield (130.9 mg) as white solid; Mp: 141-143 °C;  $^1\text{H}$  NMR (400 MHz,  $\text{CDCl}_3$ ):  $\delta$  = 10.37 (brs, 1H), 7.53-7.51 (m, 1H), 7.46-7.44 (m, 1H), 7.26-7.20 (m, 3H), 7.16-7.10 (m, 5H), 7.08-7.00 (m, 12H), 6.25 (s, 1H), 2.60-2.56 (m, 4H), 1.59-1.51 (m, 4H), 1.35-1.26 (m, 4H), 0.91-0.87 (m, 6H);  $^{13}\text{C}\{^1\text{H}\}$  NMR (100 MHz,  $\text{CDCl}_3$ ):  $\delta$  = 147.3 (d,  $J_{\text{C-P}}$  = 3.0 Hz), 139.3, 136.2, 133.0 (d,  $J_{\text{C-P}}$  = 9.0 Hz), 131.0 (d,  $J_{\text{C-P}}$  = 5.0 Hz), 128.6, 128.3 (d,  $J_{\text{C-P}}$  = 12.0 Hz), 127.8, 127.7, 127.4, 127.1, 122.0, 120.3, 119.5, 111.5, 105.5 (d,  $J_{\text{C-P}}$  = 7.0 Hz), 60.8 (d,  $J_{\text{C-P}}$  = 62.0 Hz), 35.5, 33.0, 22.2, 13.8;  $^{31}\text{P}\{^1\text{H}\}$  NMR (162 MHz,  $\text{CDCl}_3$ ):  $\delta$  = 38.0; HRMS (ESI): Exact mass calcd for  $\text{C}_{41}\text{H}_{42}\text{NOP}$   $[\text{M}+\text{H}]^+$ : 596.3077, Found: 596.3074.

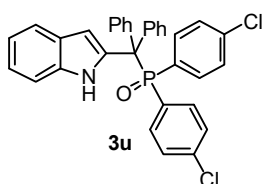

Column chromatography afforded the desired product **3u** in 61% yield (84.2 mg) as white powder;  $^1\text{H}$  NMR (600 MHz,  $\text{CDCl}_3$ ):  $\delta$  = 10.01 (brs, 1H), 7.53-7.51 (m, 1H), 7.44-7.42 (m, 1H), 7.31-7.17 (m, 11H), 7.13-7.09 (m, 1H), 7.05-7.00 (m, 8H), 6.32 (s, 1H);  $^{13}\text{C}\{^1\text{H}\}$  NMR (150 MHz,  $\text{CDCl}_3$ ):  $\delta$  = 139.0, 138.6, 136.2, 134.3 (d,  $J_{\text{C-P}}$  = 9.0 Hz), 130.8 (d,  $J_{\text{C-P}}$  = 4.5 Hz), 129.6, 129.0, 128.7 (d,  $J_{\text{C-P}}$  = 12.0 Hz), 128.1, 127.9, 126.9, 122.5, 120.5, 119.9, 111.5, 106.0, 60.9 (d,  $J_{\text{C-P}}$  = 63.0 Hz);  $^{31}\text{P}\{^1\text{H}\}$  NMR (243 MHz,  $\text{CDCl}_3$ ):  $\delta$  = 36.2.

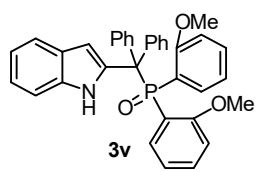

Column chromatography afforded the desired product **3v** in 84% yield (114.0 mg) as white powder; Mp: 140-142 °C;  $^1\text{H}$  NMR (600 MHz,  $\text{CDCl}_3$ ):  $\delta$  = 11.02 (brs, 1H), 7.53 (s, 2H), 7.45-7.43 (m, 2H), 7.40-7.37 (m, 2H), 7.15-7.09 (m, 7H), 7.03-6.99 (m, 5H), 6.87-6.85 (m, 2H), 6.64-6.62 (m, 2H), 5.74 (s, 1H), 3.20 (s, 6H);  $^{13}\text{C}\{^1\text{H}\}$  NMR (150 MHz,  $\text{CDCl}_3$ ):  $\delta$  = 160.1, 142.4, 141.1, 136.5, 134.8, 133.6, 131.1 (d,  $J_{\text{C-P}}$  = 6.0 Hz), 127.0, 126.6, 126.4, 121.4, 121.3 (d,  $J_{\text{C-P}}$  = 94.5 Hz), 120.5 (d,  $J_{\text{C-P}}$  = 10.5 Hz), 120.2,



119.0, 111.3, 110.2 (d,  $J_{C-P}$  = 6.0 Hz), 105.5 (d,  $J_{C-P}$  = 6.0 Hz), 64.2 (d,  $J_{C-P}$  = 63.0 Hz), 54.5;  $^{31}\text{P}\{^1\text{H}\}$  NMR (243 MHz,  $\text{CDCl}_3$ ):  $\delta$  = 47.5; HRMS (ESI): Exact mass calcd for  $\text{C}_{35}\text{H}_{30}\text{NO}_3\text{P}$   $[\text{M}+\text{H}]^+$ : 544.2036, Found: 544.2025.

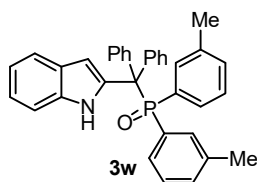

Column chromatography afforded the desired product **3w** in 85% yield (108.6 mg) as white powder; Mp: 221-223 °C;  $^1\text{H}$  NMR (600 MHz,  $\text{CDCl}_3$ ):  $\delta$  = 10.22 (brs, 1H), 7.52-7.51 (m, 1H), 7.48-7.47 (m, 1H), 7.28-7.21 (m, 6H), 7.18-7.14 (m, 6H), 7.11-7.09 (m, 1H), 7.02-7.01 (m, 3H), 6.97-6.94 (m, 2H), 6.82-6.80 (m, 2H), 6.30 (s, 1H), 2.07 (s, 6H);  $^{13}\text{C}\{^1\text{H}\}$  NMR (150 MHz,  $\text{CDCl}_3$ ):  $\delta$  = 139.2, 138.0 (d,  $J_{C-P}$  = 10.5 Hz), 136.2, 133.5 (d,  $J_{C-P}$  = 9.0 Hz), 132.6, 131.0 (d,  $J_{C-P}$  = 4.5 Hz), 130.4, 130.1 (d,  $J_{C-P}$  = 9.0 Hz), 128.0, 127.9, 127.5, 127.0, 122.2, 120.3, 119.6, 111.4, 105.8, 61.0 (d,  $J_{C-P}$  = 61.5 Hz), 21.2;  $^{31}\text{P}\{^1\text{H}\}$  NMR (243 MHz,  $\text{CDCl}_3$ ):  $\delta$  = 37.8; HRMS (ESI): Exact mass calcd for  $\text{C}_{35}\text{H}_{30}\text{NOP}$   $[\text{M}+\text{H}]^+$ : 512.2138, Found: 512.2131.

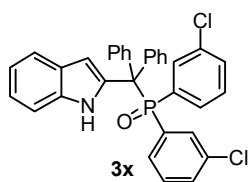

Column chromatography afforded the desired product **3x** in 73% yield (100.6 mg) as white powder; Mp: 211-213 °C;  $^1\text{H}$  NMR (600 MHz,  $\text{CDCl}_3$ ):  $\delta$  = 9.91 (brs, 1H), 7.54-7.52 (m, 1H), 7.46-7.44 (m, 3H), 7.33-7.31 (m, 2H), 7.25-7.20 (m, 7H), 7.13-7.11 (m, 1H), 7.06-7.03 (m, 6H), 6.96-6.94 (m, 2H), 6.36 (s, 1H);  $^{13}\text{C}\{^1\text{H}\}$  NMR (150 MHz,  $\text{CDCl}_3$ ):  $\delta$  = 138.4, 136.2, 134.7 (d,  $J_{C-P}$  = 15.0 Hz), 133.1, 132.8 (d,  $J_{C-P}$  = 9.0 Hz), 132.5, 132.4, 130.9 (d,  $J_{C-P}$  = 9.0 Hz), 130.8 (d,  $J_{C-P}$  = 6.0 Hz), 129.7 (d,  $J_{C-P}$  = 13.5 Hz), 128.2, 128.1, 126.9, 122.6, 120.5, 119.9, 111.5, 106.1 (d,  $J_{C-P}$  = 6.0 Hz), 61.1 (d,  $J_{C-P}$  = 63.0 Hz);  $^{31}\text{P}\{^1\text{H}\}$  NMR (243 MHz,  $\text{CDCl}_3$ ):  $\delta$  = 35.2; HRMS (ESI): Exact mass calcd for  $\text{C}_{33}\text{H}_{24}\text{Cl}_2\text{NOP}$   $[\text{M}+\text{H}]^+$ : 552.1045, Found: 552.1042.

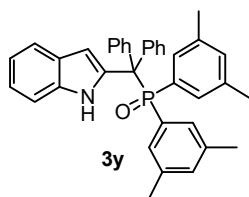

Column chromatography afforded the desired product **3y** in 90% yield (121.2 mg) as white powder; Mp: 236-238 °C;  $^1\text{H}$  NMR (600 MHz,  $\text{CDCl}_3$ ):  $\delta$  = 10.13 (brs, 1H), 7.51-7.50 (m, 1H), 7.47-7.46 (m, 1H), 7.29-7.25 (m, 2H), 7.24-7.19 (m, 1H), 7.18-7.14 (m, 4H), 7.10-7.08 (m, 1H), 7.05 (s, 2H), 7.03-7.02 (m, 4H), 6.69-6.62 (m, 4H), 6.31 (s, 1H), 2.07 (s, 12H);  $^{13}\text{C}\{^1\text{H}\}$  NMR (150 MHz,  $\text{CDCl}_3$ ):  $\delta$  = 139.3, 137.6 (d,  $J_{C-P}$  = 12.0 Hz), 136.2, 133.4, 131.1 (d,  $J_{C-P}$  = 4.5 Hz), 130.9, 130.6 (d,  $J_{C-P}$  = 7.5 Hz), 130.3, 127.8, 127.4, 127.1, 122.1, 120.2, 119.6, 111.3, 105.7, 61.2 (d,  $J_{C-P}$  = 60.0 Hz), 21.1;  $^{31}\text{P}\{^1\text{H}\}$  NMR (243 MHz,  $\text{CDCl}_3$ ):  $\delta$  = 38.0; HRMS (ESI): Exact mass calcd for  $\text{C}_{37}\text{H}_{34}\text{NOP}$   $[\text{M}+\text{H}]^+$ : 540.2451, Found: 540.2443.

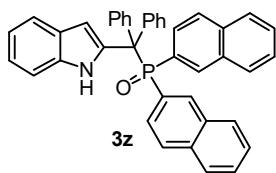

Column chromatography afforded the desired product **3z** in 92% yield (134.0 mg) as white powder; Mp: 200-202 °C;  $^1\text{H}$  NMR (400 MHz,  $\text{CDCl}_3$ ):  $\delta$  = 10.34 (brs, 1H), 7.81-7.79 (m, 2H), 7.73-7.69 (m, 3H), 7.66 (s, 1H), 7.57-7.43 (m, 8H), 7.31-7.26 (m, 3H), 7.19-7.07 (m, 11H), 6.32 (s, 1H);  $^{13}\text{C}\{^1\text{H}\}$  NMR (100 MHz,  $\text{CDCl}_3$ ):  $\delta$  = 139.2, 136.3, 135.5 (d,  $J_{\text{C-P}}$  = 8.0 Hz), 134.5 (d,  $J_{\text{C-P}}$  = 2.0 Hz), 132.1 (d,  $J_{\text{C-P}}$  = 13.0 Hz), 131.1 (d,  $J_{\text{C-P}}$  = 6.0 Hz), 129.1, 128.8, 128.4, 128.0, 127.9 (d,  $J_{\text{C-P}}$  = 4.0 Hz), 127.8, 127.7 (d,  $J_{\text{C-P}}$  = 4.0 Hz), 127.5, 127.1, 126.7, 122.3, 120.4, 119.8, 111.5, 106.1, 61.3 (d,  $J_{\text{C-P}}$  = 62.0 Hz);  $^{31}\text{P}\{^1\text{H}\}$  NMR (162 MHz,  $\text{CDCl}_3$ ):  $\delta$  = 38.1; HRMS (ESI): Exact mass calcd for  $\text{C}_{41}\text{H}_{30}\text{NOP}$   $[\text{M}+\text{H}]^+$ : 584.2138, Found: 584.2127.

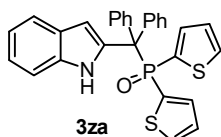

Column chromatography afforded the desired product **3za**<sup>3</sup> in 89% yield (110.7 mg) as white powder;  $^1\text{H}$  NMR (600 MHz,  $\text{CDCl}_3$ ):  $\delta$  = 10.09 (brs, 1H), 7.65 (s, 2H), 7.57-7.56 (m, 1H), 7.46 (brs, 1H), 7.32-7.29 (m, 2H), 7.27-7.25 (m, 1H), 7.23-7.20 (m, 4H), 7.16-7.14 (m, 1H), 7.05 (brs, 6H), 6.85 (s, 2H), 6.30 (s, 1H);  $^{13}\text{C}\{^1\text{H}\}$  NMR (150 MHz,  $\text{CDCl}_3$ ):  $\delta$  = 138.0 (d,  $J_{\text{C-P}}$  = 9.0 Hz), 136.2, 135.4 (d,  $J_{\text{C-P}}$  = 4.5 Hz), 130.8, 128.1, 128.0 (d,  $J_{\text{C-P}}$  = 15.0 Hz), 127.9, 127.3, 122.4, 120.5, 119.9, 111.7, 106.4, 61.1 (d,  $J_{\text{C-P}}$  = 72.0 Hz);  $^{31}\text{P}\{^1\text{H}\}$  NMR (243 MHz,  $\text{CDCl}_3$ ):  $\delta$  = 29.9.

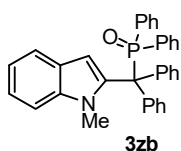

Column chromatography afforded **3zb** in 64% yield (79.5 mg) as white powder; Mp: 246-248 °C;  $^1\text{H}$  NMR (400 MHz,  $\text{CDCl}_3$ ):  $\delta$  = 7.58-7.56 (m, 1H), 7.42-7.34 (m, 8H), 7.28-7.25 (m, 4H), 7.24-7.18 (m, 5H), 7.15-7.11 (m, 2H), 7.08-7.04 (m, 1H), 7.00-6.96 (m, 4H), 2.84 (s, 3H);  $^{13}\text{C}\{^1\text{H}\}$  NMR (100 MHz,  $\text{CDCl}_3$ ):  $\delta$  = 138.2 (d,  $J_{\text{C-P}}$  = 2.0 Hz), 137.5, 136.3 (d,  $J_{\text{C-P}}$  = 4.0 Hz), 133.6 (d,  $J_{\text{C-P}}$  = 8.0 Hz), 131.6 (d,  $J_{\text{C-P}}$  = 5.0 Hz), 131.2, 130.3, 127.9 (d,  $J_{\text{C-P}}$  = 2.0 Hz), 127.8 (d,  $J_{\text{C-P}}$  = 2.0 Hz), 127.6 (d,  $J_{\text{C-P}}$  = 2.0 Hz), 126.9, 121.6, 120.9, 119.3, 108.8, 106.3 (d,  $J_{\text{C-P}}$  = 4.0 Hz), 60.3 (d,  $J_{\text{C-P}}$  = 60.0 Hz), 32.2;  $^{31}\text{P}\{^1\text{H}\}$  NMR (162 MHz,  $\text{CDCl}_3$ ):  $\delta$  = 34.4; HRMS (ESI): Exact mass calcd for  $\text{C}_{34}\text{H}_{28}\text{NOP}$   $[\text{M}+\text{H}]^+$ : 498.1981, Found: 498.1975.

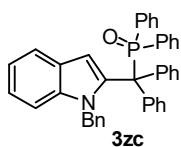

Column chromatography afforded **3zc** in 54% yield (77.4 mg) as white powder; Mp: 170-172 °C;  $^1\text{H}$  NMR (400 MHz,  $\text{CDCl}_3$ ):  $\delta$  = 7.60 (d,  $J$  = 8.0 Hz, 1H), 7.45 (s, 1H), 7.40-7.36 (m, 6H), 7.21-7.17 (m, 6H), 7.16-7.10 (m, 4H), 7.06-7.02 (m, 1H), 6.99-6.91 (m, 6H), 6.87-6.83 (m, 2H), 6.76 (d,  $J$  = 8.0 Hz, 1H), 6.22-6.21 (m, 2H), 4.72 (s, 2H);  $^{13}\text{C}\{^1\text{H}\}$  NMR (100 MHz,  $\text{CDCl}_3$ ):  $\delta$  = 138.8 (d,  $J_{\text{C-P}}$  = 3.0 Hz), 137.3, 136.1, 135.6, 133.7 (d,  $J_{\text{C-P}}$  = 8.0 Hz), 131.7 (d,  $J_{\text{C-P}}$  = 4.0 Hz), 131.5 (d,  $J_{\text{C-P}}$  = 3.0 Hz), 130.8, 129.8, 127.8 (d,  $J_{\text{C-P}}$  = 13.0

Hz), 127.6 (d,  $J_{C-P} = 11.0$  Hz), 127.5, 126.0, 125.6, 121.8, 120.9, 119.6, 110.5, 106.5 (d,  $J_{C-P} = 5.0$  Hz), 60.2 (d,  $J_{C-P} = 60.0$  Hz), 49.5;  $^{31}\text{P}\{^1\text{H}\}$  NMR (162 MHz,  $\text{CDCl}_3$ ):  $\delta = 34.7$ ; HRMS (ESI): Exact mass calcd for  $\text{C}_{40}\text{H}_{32}\text{NOP}$   $[\text{M}+\text{H}]^+$ : 574.2294, Found: 574.2289.

### 3. General procedure for HOTf-catalyzed synthesis of C3-phosphorylated indoles

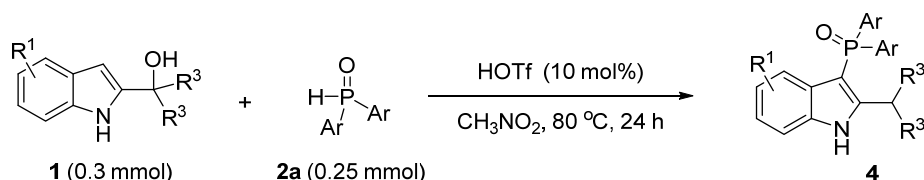

The reaction was carried out under an air atmosphere. To a 10-mL vial were added 2-indolylmethanols **1** (0.30 mmol, 1.2 equivs),  $\text{Ar}_2\text{P}(\text{O})\text{H}$  **2** (0.25 mmol, 1.0 equiv) and 2.5 mL of anhydrous  $\text{CH}_3\text{CN}$ . After adding HOTf (7.5 mg, 10 mol%) which was prepared as a solution in  $\text{CH}_3\text{NO}_2$ , the reaction mixture was stirred at 80 °C for 24 hours. The reaction mixture was directly subjected to column chromatography using dichloromethane /ethyl acetate (generally 10:1 to 6:1, v:v) as the eluent to afford the desired products **4**.

Column chromatography afforded the desired product **4a**<sup>3</sup> in 73% yield (77.7 mg) as white powder;  $^1\text{H}$  NMR (600 MHz,  $\text{DMSO}-d_6$ ):  $\delta = 11.70$  (d,  $J = 6.0$  Hz, 1H), 7.61-7.56 (m, 6H), 7.49-7.45 (m, 4H), 7.41 (d,  $J = 12.0$  Hz, 1H), 7.30-7.26 (m, 4H), 7.23-7.20 (m, 2H), 7.13-7.12 (m, 4H), 7.07-7.03 (m, 1H), 6.82-6.79 (m, 1H), 6.73 (s, 1H), 6.54 (d,  $J = 12.0$  Hz, 1H);  $^{31}\text{P}\{^1\text{H}\}$  NMR (243 MHz,  $\text{DMSO}-d_6$ ):  $\delta = 22.1$ .

Column chromatography afforded the desired product **4b**<sup>3</sup> in 65% yield (83.2 mg) as white powder;  $^1\text{H}$  NMR (600 MHz,  $\text{CDCl}_3$ ):  $\delta = 8.70$  (s, 1H), 7.60-7.57 (m, 4H), 7.47-7.45 (m, 2H), 7.34-7.31 (m, 4H), 7.28 (d,  $J = 6.0$  Hz, 1H), 7.08 (t,  $J = 6.0$  Hz, 1H), 6.98-6.94 (m, 8H), 6.90 (t,  $J = 6.0$  Hz, 1H), 6.82 (d,  $J = 6.0$  Hz, 1H), 6.48 (s, 1H), 2.28 (s, 6H);  $^{13}\text{C}\{^1\text{H}\}$  NMR (100 MHz,  $\text{CDCl}_3$ ):  $\delta = 149.9$  (d,  $J_{C-P} = 17.0$  Hz), 138.7, 136.1, 135.6 (d,  $J_{C-P} = 11.0$  Hz), 134.7, 133.6, 131.7 (d,  $J_{C-P} = 11.0$  Hz), 131.3 (d,  $J_{C-P} = 3.0$  Hz), 129.4 (d,  $J_{C-P} = 11.0$  Hz), 129.0 (d,  $J_{C-P} = 14.0$  Hz), 128.2 (d,  $J_{C-P} = 12.0$  Hz), 111.2, 100.9 (d,  $J_{C-P} = 126.0$  Hz), 47.4, 20.9;  $^{31}\text{P}\{^1\text{H}\}$  NMR (243 MHz,  $\text{CDCl}_3$ ):  $\delta = 24.2$ .

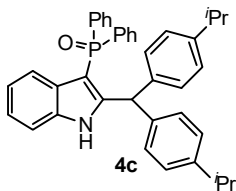

Column chromatography afforded the desired product **4c** in 57% yield (80.8 mg) as white powder; Mp: 268-270 °C;  $^1\text{H}$  NMR (600 MHz,  $\text{CDCl}_3$ ):  $\delta$  = 8.51 (s, 1H), 7.59-7.56 (m, 4H), 7.46-7.43 (m, 2H), 7.33-7.28 (m, 5H), 7.11-7.08 (m, 1H), 7.04 (AB,  $J$  = 6.0 Hz, 4H), 6.98 (AB,  $J$  = 12.0 Hz, 4H), 6.92-6.89 (m, 1H), 6.85-6.84 (m, 1H), 6.50 (s, 1H), 2.87-2.80 (m, 2H), 1.22 (d,  $J$  = 6.0 Hz, 12H);  $^{13}\text{C}\{^1\text{H}\}$  NMR (100 MHz,  $\text{CDCl}_3$ ):  $\delta$  = 150.0 (d,  $J_{\text{C-P}}$  = 17.0 Hz), 147.1, 138.9, 135.6 (d,  $J_{\text{C-P}}$  = 11.0 Hz), 134.7, 133.6, 131.7 (d,  $J_{\text{C-P}}$  = 10.0 Hz), 131.4 (d,  $J_{\text{C-P}}$  = 3.0 Hz), 129.4 (d,  $J_{\text{C-P}}$  = 12.0 Hz), 128.9, 128.2 (d,  $J_{\text{C-P}}$  = 12.0 Hz), 126.4, 122.1, 120.8 (d,  $J_{\text{C-P}}$  = 12.0 Hz), 111.1, 100.8 (d,  $J_{\text{C-P}}$  = 125.0 Hz), 47.4, 33.6, 24.0, 23.9;  $^{31}\text{P}\{^1\text{H}\}$  NMR (243 MHz,  $\text{CDCl}_3$ ):  $\delta$  = 24.4; HRMS (ESI): Exact mass calcd for  $\text{C}_{39}\text{H}_{38}\text{NOP}$   $[\text{M}+\text{H}]^+$ : 568.2764, Found: 568.2758.

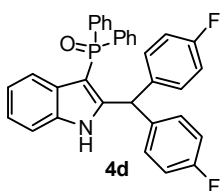

Column chromatography afforded the desired product **4d**<sup>3</sup> in 68% yield (88.2 mg) as white powder;  $^1\text{H}$  NMR (600 MHz,  $\text{CDCl}_3$ ):  $\delta$  = 9.19 (s, 1H), 7.57-7.54 (m, 4H), 7.49-7.47 (m, 2H), 7.35-7.32 (m, 4H), 7.27 (d,  $J$  = 6.0 Hz, 1H), 7.06-7.03 (m, 1H), 7.02-7.00 (m, 4H), 6.89-6.86 (m, 1H), 6.80-6.78 (m, 4H), 6.72 (s, 1H), 6.64 (d,  $J$  = 6.0 Hz, 1H);  $^{13}\text{C}\{^1\text{H}\}$  NMR (150 MHz,  $\text{CDCl}_3$ ):  $\delta$  = 161.6 (d,  $J_{\text{C-F}}$  = 244.5 Hz), 149.4 (d,  $J_{\text{C-P}}$  = 16.5 Hz), 137.1, 135.9 (d,  $J_{\text{C-P}}$  = 12.0 Hz), 134.2, 133.5, 131.6 (d,  $J_{\text{C-P}}$  = 10.5 Hz), 130.6 (d,  $J_{\text{C-P}}$  = 7.5 Hz), 129.1 (d,  $J_{\text{C-P}}$  = 10.5 Hz), 128.3 (d,  $J_{\text{C-P}}$  = 12.0 Hz), 122.3, 121.1, 120.5, 115.2 (d,  $J_{\text{C-F}}$  = 21.0 Hz), 111.4, 101.2 (d,  $J_{\text{C-P}}$  = 124.5 Hz), 46.6;  $^{31}\text{P}\{^1\text{H}\}$  NMR (243 MHz,  $\text{CDCl}_3$ ):  $\delta$  = 24.5;  $^{19}\text{F}\{^1\text{H}\}$  NMR (565 MHz,  $\text{CDCl}_3$ ):  $\delta$  = -115.7.

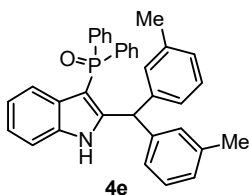

Column chromatography afforded the desired product **4e**<sup>3</sup> in 56% yield (71.5 mg) as white powder;  $^1\text{H}$  NMR (600 MHz,  $\text{CDCl}_3+\text{DMSO-}d_6$ ):  $\delta$  = 11.55 (d,  $J$  = 1.8 Hz, 1H), 7.60-7.55 (m, 4H), 7.55-7.52 (m, 2H), 7.44-7.42 (m, 4H), 7.39 (d,  $J$  = 8.4 Hz, 1H), 7.12 (t,  $J$  = 7.8 Hz, 2H), 7.03-7.00 (m, 1H), 6.98-6.97 (m, 2H), 6.94-6.93 (m, 2H), 6.88 (s, 2H), 6.78-6.75 (m, 1H), 6.61 (s, 1H), 6.52 (d,  $J$  = 8.4 Hz, 1H), 2.18 (s, 6H);  $^{13}\text{C}\{^1\text{H}\}$  NMR (100 MHz,  $\text{CDCl}_3+\text{DMSO-}d_6$ ):  $\delta$  = 149.8 (d,  $J_{\text{C-P}}$  = 17.0 Hz), 141.6, 137.2, 136.8 (d,  $J_{\text{C-P}}$  = 12.0 Hz), 135.1, 134.0, 131.5, 131.1 (d,  $J_{\text{C-P}}$  = 10.0 Hz), 129.4, 128.3 (d,  $J_{\text{C-P}}$  = 12.0 Hz), 128.0, 127.0, 125.7, 121.5, 120.1, 119.6, 111.9, 99.9 (d,  $J_{\text{C-P}}$  = 125.0 Hz), 47.0, 21.1;  $^{31}\text{P}\{^1\text{H}\}$  NMR (243 MHz,  $\text{CDCl}_3+\text{DMSO-}d_6$ ):  $\delta$  = 23.2.

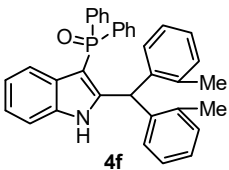

Column chromatography afforded the desired product **4f** in 75% yield (76.8 mg) as white powder; Mp: 176-178 °C;  $^1\text{H}$  NMR (600 MHz,  $\text{CDCl}_3$ ):  $\delta$  = 8.17 (s, 1H), 7.56-7.52 (m, 4H), 7.44-7.42 (m, 2H), 7.31-7.28 (m, 5H), 7.16-7.11 (m, 5H), 6.98-6.93 (m, 3H), 6.87-6.86 (m, 2H), 6.66-6.65 (m, 2H), 2.20 (s, 6H);  $^{13}\text{C}\{^1\text{H}\}$  NMR (150 MHz,  $\text{CDCl}_3$ ):  $\delta$  = 149.1 (d,  $J_{\text{C-P}}$  = 16.5 Hz), 139.9, 137.4, 135.2 (d,  $J_{\text{C-P}}$  = 12.0 Hz), 134.3, 133.6, 131.5 (d,  $J_{\text{C-P}}$  = 10.5 Hz), 131.3, 130.6, 129.5 (d,  $J_{\text{C-P}}$  = 12.0 Hz), 128.2, 128.1 (d,  $J_{\text{C-P}}$  = 4.5 Hz), 126.9, 125.9, 122.1, 120.9 (d,  $J_{\text{C-P}}$  = 42.0 Hz), 111.1, 100.6 (d,  $J_{\text{C-P}}$  = 124.5 Hz), 43.2, 19.7;  $^{31}\text{P}\{^1\text{H}\}$  NMR (243 MHz,  $\text{CDCl}_3$ ):  $\delta$  = 23.7; HRMS (ESI): Exact mass calcd for  $\text{C}_{35}\text{H}_{30}\text{NOP}$   $[\text{M}+\text{H}]^+$ : 512.2138, Found: 512.2133.

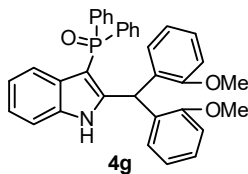

Column chromatography afforded the desired product **4g** in 78% yield (105.8 mg) as white powder; Mp: 278-280 °C;  $^1\text{H}$  NMR (600 MHz,  $\text{CDCl}_3+\text{DMSO}-d_6$ ):  $\delta$  = 10.75 (d,  $J$  = 3.0 Hz, 1H), 7.52-7.49 (m, 4H), 7.46-7.43 (m, 2H), 7.40 (d,  $J$  = 8.4 Hz, 1H), 7.32 (td,  $J$  = 7.8 Hz, 3.0 Hz, 4H), 7.16 (td,  $J$  = 7.8 Hz, 1.8 Hz, 2H), 7.00-6.97 (m, 2H), 6.80 (d,  $J$  = 7.8 Hz, 1H), 6.79-6.76 (m, 4H), 6.68-6.67 (m, 2H), 6.63 (s, 1H), 3.44 (s, 6H);  $^{13}\text{C}\{^1\text{H}\}$  NMR (100 MHz,  $\text{CDCl}_3+\text{DMSO}-d_6$ ):  $\delta$  = 156.4, 148.5 (d,  $J_{\text{C-P}}$  = 18.0 Hz), 136.0 (d,  $J_{\text{C-P}}$  = 12.0 Hz), 135.2, 134.1, 131.1 (d,  $J_{\text{C-P}}$  = 10.0 Hz), 130.9 (d,  $J_{\text{C-P}}$  = 2.0 Hz), 130.1, 129.3 (d,  $J_{\text{C-P}}$  = 11.0 Hz), 128.8, 127.8 (d,  $J_{\text{C-P}}$  = 12.0 Hz), 127.5, 121.0, 120.1, 119.7 (d,  $J_{\text{C-P}}$  = 7.0 Hz), 111.8, 110.3, 98.7 (d,  $J_{\text{C-P}}$  = 127.0 Hz), 54.9;  $^{31}\text{P}\{^1\text{H}\}$  NMR (243 MHz,  $\text{CDCl}_3+\text{DMSO}-d_6$ ):  $\delta$  = 22.0; HRMS (ESI): Exact mass calcd for  $\text{C}_{35}\text{H}_{30}\text{NO}_3\text{P}$   $[\text{M}+\text{H}]^+$ : 544.2036, Found: 544.2029.

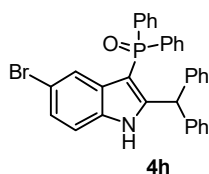

Column chromatography afforded the desired product **4h** in 36% yield (50.5 mg) as white powder; Mp: 284-286 °C;  $^1\text{H}$  NMR (600 MHz,  $\text{CDCl}_3$ ):  $\delta$  = 8.96 (s, 1H), 7.55-7.52 (m, 4H), 7.49-7.47 (m, 2H), 7.34 (td,  $J$  = 7.8 Hz, 3.0 Hz, 4H), 7.17-7.11 (m, 8H), 7.01-6.99 (m, 4H), 6.86 (s, 1H), 6.42 (s, 1H);  $^{13}\text{C}\{^1\text{H}\}$  NMR (100 MHz,  $\text{CDCl}_3$ ):  $\delta$  = 150.2 (d,  $J_{\text{C-P}}$  = 17.0 Hz), 141.1, 134.5 (d,  $J_{\text{C-P}}$  = 11.0 Hz), 134.1, 131.8 (d,  $J_{\text{C-P}}$  = 11.0 Hz), 131.7 (d,  $J_{\text{C-P}}$  = 3.0 Hz), 131.1 (d,  $J_{\text{C-P}}$  = 11.0 Hz), 129.0, 128.5, 128.4 (d,  $J_{\text{C-P}}$  = 13.0 Hz), 126.8, 125.2, 123.2, 114.4, 112.7, 101.3 (d,  $J_{\text{C-P}}$  = 125.0 Hz), 48.1;  $^{31}\text{P}\{^1\text{H}\}$  NMR (243 MHz,  $\text{CDCl}_3$ ):  $\delta$  = 23.9; HRMS (ESI): Exact mass calcd for  $\text{C}_{33}\text{H}_{25}\text{BrNOP}$   $[\text{M}+\text{H}]^+$ : 562.0930, Found: 562.0922.

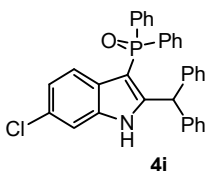

Column chromatography afforded the desired product **4i** in 42% yield (54.3 mg) as white powder; Mp: 276-278 °C;  $^1\text{H}$  NMR (600 MHz,  $\text{CDCl}_3+\text{DMSO}-d_6$ ):  $\delta$  = 11.82 (d,  $J$  = 1.8 Hz, 1H), 7.58-7.55 (m, 6H), 7.48-7.45 (m, 4H), 7.42 (t,  $J$  = 1.8 Hz, 1H), 7.29-7.27 (m, 4H), 7.23-7.21 (m, 2H), 7.10-7.09 (m, 4H), 6.87 (dd,  $J$  = 9.0 Hz, 1.8 Hz, 1H), 6.63 (s, 1H), 6.54 (d,  $J$  = 9.0 Hz, 1H);  $^{13}\text{C}\{^1\text{H}\}$  NMR (100 MHz,  $\text{DMSO}-d_6$ ):  $\delta$  = 150.6 (d,  $J_{\text{C-P}}$  = 16.0 Hz), 141.4, 137.5 (d,  $J_{\text{C-P}}$  = 11.0 Hz), 134.8, 133.7, 131.9 (d,  $J_{\text{C-P}}$  = 3.0 Hz), 131.2 (d,  $J_{\text{C-P}}$  = 10.0 Hz), 128.8, 128.7, 128.5, 127.0 (d,  $J_{\text{C-P}}$  = 12.0 Hz), 126.7 (d,  $J_{\text{C-P}}$  = 2.0 Hz), 121.0, 120.7, 111.7, 100.9 (d,  $J_{\text{C-P}}$  = 124.0 Hz), 47.1;  $^{31}\text{P}\{^1\text{H}\}$  NMR (242 MHz,  $\text{DMSO}-d_6$ ):  $\delta$  = 22.3; HRMS (ESI): Exact mass calcd for  $\text{C}_{33}\text{H}_{25}\text{ClN}_2\text{O}_2\text{P}$   $[\text{M}+\text{H}]^+$ : 518.1435, Found: 518.1430.

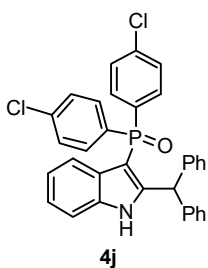

Column chromatography afforded the desired product **4j**<sup>3</sup> in 58% yield (80.2 mg) as white powder;  $^1\text{H}$  NMR (600 MHz,  $\text{CDCl}_3+\text{DMSO}-d_6$ ):  $\delta$  = 11.76 (s, 1H), 7.59-7.55 (m, 4H), 7.53-7.51 (m, 4H), 7.43 (d,  $J$  = 7.8 Hz, 1H), 7.28-7.26 (m, 4H), 7.23-7.20 (m, 2H), 7.13-7.11 (m, 4H), 7.07 (t,  $J$  = 7.2 Hz, 1H), 6.85 (t,  $J$  = 7.8 Hz, 1H), 6.72 (s, 1H), 6.54 (d,  $J$  = 8.4 Hz, 1H);  $^{13}\text{C}\{^1\text{H}\}$  NMR (150 MHz,  $\text{CDCl}_3+\text{DMSO}-d_6$ ):  $\delta$  = 150.3 (d,  $J_{\text{C-P}}$  = 18.0 Hz), 141.5, 137.1, 133.5, 133.0 (d,  $J_{\text{C-P}}$  = 10.5 Hz), 132.8, 128.8 (d,  $J_{\text{C-P}}$  = 13.5 Hz), 128.7, 128.4, 127.8 (d,  $J_{\text{C-P}}$  = 12.0 Hz), 126.6, 122.0, 120.6, 119.4, 112.3, 99.1 (d,  $J_{\text{C-P}}$  = 127.5 Hz), 47.2;  $^{31}\text{P}\{^1\text{H}\}$  NMR (243 MHz,  $\text{CDCl}_3+\text{DMSO}-d_6$ ):  $\delta$  = 22.6.

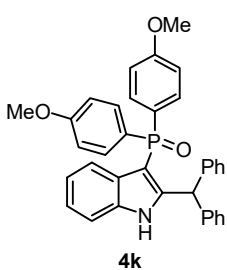

Column chromatography afforded the desired product **4k**<sup>3</sup> in 34% yield (46.2 mg) as white powder;  $^1\text{H}$  NMR (600 MHz,  $\text{DMSO}-d_6$ ):  $\delta$  = 11.63 (d,  $J$  = 1.8 Hz, 1H), 7.50-7.46 (m, 4H), 7.39 (d,  $J$  = 8.4 Hz, 1H), 7.29-7.27 (m, 4H), 7.23-7.20 (m, 2H), 7.15-7.13 (m, 4H), 7.04 (t,  $J$  = 7.2 Hz, 1H), 7.01-6.99 (m, 4H), 6.83 (t,  $J$  = 7.2 Hz, 1H), 6.79 (s, 1H), 6.62 (d,  $J$  = 7.8 Hz, 1H), 3.77 (s, 6H);  $^{13}\text{C}\{^1\text{H}\}$  NMR (150 MHz,  $\text{DMSO}-d_6$ ):  $\delta$  = 161.8, 149.3 (d,  $J_{\text{C-P}}$  = 18.0 Hz), 141.9, 137.0 (d,  $J_{\text{C-P}}$  = 12.0 Hz), 133.1 (d,  $J_{\text{C-P}}$  = 10.5 Hz), 128.6 (d,  $J_{\text{C-P}}$  = 57.0 Hz), 128.2 (d,  $J_{\text{C-P}}$  = 12.0 Hz), 126.8, 126.6, 126.0, 121.8, 120.3, 119.9, 114.1 (d,  $J_{\text{C-P}}$  = 13.5 Hz), 112.0, 101.2 (d,  $J_{\text{C-P}}$  = 124.5 Hz), 55.4, 47.0;  $^{31}\text{P}\{^1\text{H}\}$  NMR (243 MHz,  $\text{DMSO}-d_6$ ):  $\delta$  = 22.1.

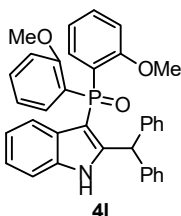

Column chromatography afforded the desired product **4l** in 83% yield (112.6 mg) as white powder; Mp: 230-232 °C;  $^1\text{H}$  NMR (600 MHz,  $\text{CDCl}_3$ ):  $\delta$  = 8.79 (s, 1H), 7.41-7.36 (m, 4H), 7.19-7.18 (m, 1H), 7.15-7.13 (m, 10H), 7.00-6.98 (m, 1H), 6.94 (s, 1H), 6.86-6.79 (m, 6H), 3.34 (s, 6H);  $^{13}\text{C}\{^1\text{H}\}$  NMR (150 MHz,  $\text{CDCl}_3$ ):  $\delta$  = 161.8,

148.3 (d,  $J_{C-P}$  = 18.0 Hz), 142.1, 135.7 (d,  $J_{C-P}$  = 12.0 Hz), 133.8 (d,  $J_{C-P}$  = 10.5 Hz), 133.1, 129.1, 128.2, 126.3, 122.3, 121.6, 121.5, 120.9, 120.2 (d,  $J_{C-P}$  = 12.0 Hz), 120.0, 110.9 (d,  $J_{C-P}$  = 15.0 Hz), 102.3 (d,  $J_{C-P}$  = 132.0 Hz), 55.1, 47.6;  $^{31}\text{P}\{^1\text{H}\}$  NMR (243 MHz,  $\text{CDCl}_3$ ):  $\delta$  = 21.5; HRMS (ESI): Exact mass calcd for  $\text{C}_{35}\text{H}_{30}\text{NO}_3\text{P}$   $[\text{M}+\text{H}]^+$ : 544.2036, Found: 544.2024.

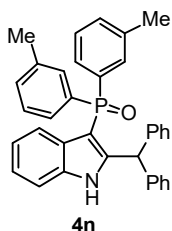

Column chromatography afforded product **4n** in 68% yield (86.8 mg) as white powder; Mp: 236-244 °C;  $^1\text{H}$  NMR (600 MHz,  $\text{CDCl}_3$ ):  $\delta$  = 8.38 (s, 1H), 7.45-7.43 (m, 2H), 7.36-7.33 (m, 2H), 7.29-7.27 (m, 1H), 7.26-7.25 (m, 2H), 7.23-7.18 (m, 8H), 7.12-7.10 (m, 1H), 7.04-7.03 (m, 4H), 6.98-6.97 (m, 1H), 6.94-6.92 (m, 1H), 6.42 (s, 1H), 2.24 (s, 6H);  $^{13}\text{C}\{^1\text{H}\}$  NMR (150 MHz,  $\text{CDCl}_3$ ):  $\delta$  = 148.6 (d,  $J_{C-P}$  = 19.5 Hz), 141.6, 138.1 (d,  $J_{C-P}$  = 12.0 Hz), 135.6 (d,  $J_{C-P}$  = 12.0 Hz), 134.3, 133.6, 132.4, 132.3, 129.5 (d,  $J_{C-P}$  = 12.0 Hz), 129.1, 128.8 (d,  $J_{C-P}$  = 10.5 Hz), 128.5, 128.1 (d,  $J_{C-P}$  = 12.0 Hz), 126.8, 122.3, 121.1 (d,  $J_{C-P}$  = 28.5 Hz), 111.0, 101.8 (d,  $J_{C-P}$  = 124.5 Hz), 48.1, 21.3;  $^{31}\text{P}\{^1\text{H}\}$  NMR (243 MHz,  $\text{CDCl}_3$ ):  $\delta$  = 24.3; HRMS (ESI): Exact mass calcd for  $\text{C}_{35}\text{H}_{30}\text{NOP}$   $[\text{M}+\text{H}]^+$ : 512.2128, Found: 512.2132.

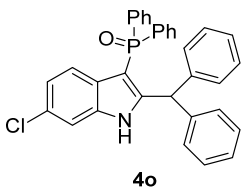

Column chromatography afforded the desired product **4o**<sup>3</sup> in 52% yield (71.6 mg) as white powder;  $^1\text{H}$  NMR (600 MHz,  $\text{CDCl}_3+\text{DMSO}-d_6$ ):  $\delta$  = 11.82 (s, 1H), 7.63-7.62 (m, 2H), 7.54-7.45 (m, 7H), 7.28-7.26 (m, 4H), 7.23-7.21 (m, 2H), 7.12-7.07 (m, 5H), 6.89-6.86 (m, 1H), 6.59-6.58 (m, 2H);  $^{13}\text{C}\{^1\text{H}\}$  NMR (150 MHz,  $\text{CDCl}_3+\text{DMSO}-d_6$ ):  $\delta$  = 150.9 (d,  $J_{C-P}$  = 18.0 Hz), 141.8, 137.5 (d,  $J$  = 16.5 Hz), 136.7, 134.4 (d,  $J_{C-P}$  = 15.0 Hz), 132.5, 131.4 (d,  $J_{C-P}$  = 13.5 Hz), 131.1 (d,  $J_{C-P}$  = 10.5 Hz), 129.2, 128.9, 128.4 (d,  $J_{C-P}$  = 12.0 Hz), 127.2, 122.6, 121.2, 119.8, 112.9, 99.2 (d,  $J_{C-P}$  = 127.5 Hz), 47.9;  $^{31}\text{P}\{^1\text{H}\}$  NMR (243 MHz,  $\text{CDCl}_3+\text{DMSO}-d_6$ ):  $\delta$  = 20.9.

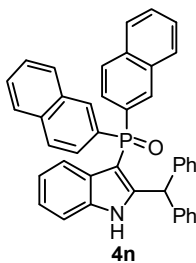

Column chromatography afforded **4p** in 80% yield (116.6 mg) as white powder; Mp: 280-282 °C;  $^1\text{H}$  NMR 600 MHz,  $\text{CDCl}_3$ ):  $\delta$  = 8.45 (s, 1H), 8.15-8.13 (m, 2H), 7.85-7.84 (m, 2H), 7.80 (dd,  $J$  = 5.4 Hz, 3.0 Hz, 2H), 7.74-7.68 (m, 4H), 7.56 (td,  $J$  = 6.0 Hz, 1.2 Hz, 2H), 7.49 (td,  $J$  = 6.0 Hz, 1.2 Hz, 2H), 7.31 (d,  $J$  = 8.4 Hz, 1H), 7.14-7.07 (m, 7H), 7.02-7.01 (m, 4H), 6.97 (d,  $J$  = 8.4 Hz, 1H), 6.88-6.86 (m, 1H), 6.60 (s, 1H);  $^{13}\text{C}\{^1\text{H}\}$  NMR (150 MHz,  $\text{CDCl}_3$ ):  $\delta$  = 149.3 (d,  $J_{C-P}$  = 16.5 Hz), 141.3, 135.6 (d,  $J_{C-P}$  = 10.5 Hz), 134.6, 133.5 (d,  $J_{C-P}$  = 10.5 Hz), 132.5 (d,  $J_{C-P}$  = 13.5 Hz), 131.6, 130.9, 129.4 (d,  $J_{C-P}$  = 12.0 Hz), 129.1, 129.0, 128.4, 128.1 (d,  $J_{C-P}$  = 12.0 Hz), 127.8 (d,  $J_{C-P}$  = 19.5 Hz), 126.9 (d,  $J_{C-P}$  = 12.0 Hz), 126.8, 126.5, 122.3, 121.1 (d,  $J_{C-P}$  = 24.0 Hz), 111.2, 101.3 (d,  $J_{C-P}$  = 124.5 Hz), 48.4;  $^{31}\text{P}\{^1\text{H}\}$  NMR (243 MHz,  $\text{CDCl}_3$ ):  $\delta$  = 24.0; HRMS (ESI): Exact mass calcd for

C<sub>41</sub>H<sub>30</sub>NOP [M+H]<sup>+</sup>: 584.2138, Found: 584.2128.

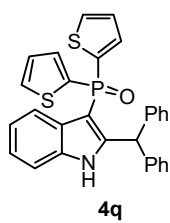

Column chromatography afforded the desired product **4q**<sup>3</sup> in 50% yield (62.0 mg) as white powder; <sup>1</sup>H NMR (600 MHz, CDCl<sub>3</sub>+DMSO-*d*<sub>6</sub>): δ = 11.80 (d, *J* = 2.4 Hz, 1H), 8.02-8.00 (m, 2H), 7.45-7.42 (m, 3H), 7.34-7.30 (m, 4H), 7.25-7.21 (m, 8H), 7.08 (t, *J* = 7.8 Hz, 1H), 6.95 (s, 1H), 6.89 (t, *J* = 7.8 Hz, 1H), 6.77 (d, *J* = 8.4 Hz, 1H); <sup>13</sup>C{<sup>1</sup>H} NMR (100 MHz, CDCl<sub>3</sub>+DMSO-*d*<sub>6</sub>): δ = 149.9 (d, *J*<sub>C-P</sub> = 19.0 Hz), 141.8, 137.5, 136.9 (d, *J*<sub>C-P</sub> = 13.0 Hz), 136.3, 135.6 (d, *J*<sub>C-P</sub> = 11.0 Hz), 134.4 (d, *J*<sub>C-P</sub> = 5.0 Hz), 128.8, 128.4, 127.6 (d, *J*<sub>C-P</sub> = 13.0 Hz), 126.6, 122.0, 120.4, 119.7, 112.1, 100.8 (d, *J*<sub>C-P</sub> = 138.0 Hz), 46.8; <sup>31</sup>P{<sup>1</sup>H} NMR (243 MHz, CDCl<sub>3</sub>+DMSO-*d*<sub>6</sub>): δ = 6.5.

#### 4. 1 mmol scale synthesis

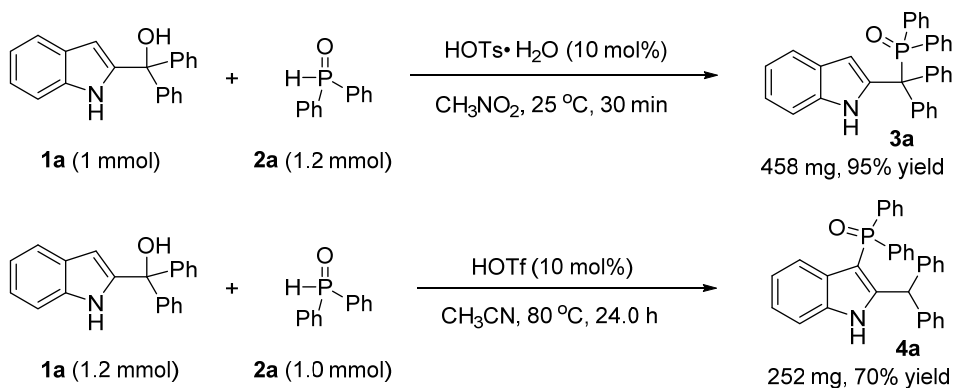

The 1 mmol scale synthesis of **3a** utilized the general procedure of HOTs·H<sub>2</sub>O-catalyzed regioselective benzylic phosphorylation of 2-indolylmethanols and 10.0 mL CH<sub>3</sub>NO<sub>2</sub> was used in this reaction.

The 1 mmol scale synthesis of **4a** utilized the general procedure for HOTf-catalyzed formation of C3-phosphorylated indoles and 10.0 mL of CH<sub>3</sub>CN was used instead of CH<sub>3</sub>NO<sub>2</sub> in this reaction.

#### 5. Control experiments

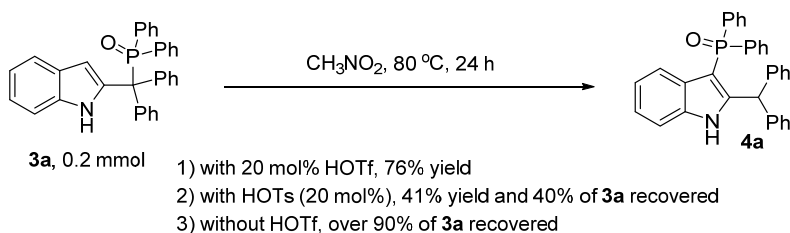



To a 10.0 mL vial was added successively **3a** (96.6 mg, 0.2 mmol), 2.0 mL anhydrous CH<sub>3</sub>NO<sub>2</sub> and HOTf (6.0 mg, 20 mol%) which was prepared as a solution in CH<sub>3</sub>NO<sub>2</sub>, the reaction mixture was stirred at 80 °C for 24 hours. The reaction mixture was directly subjected to column chromatography using dichloromethane /ethyl acetate (6:1, v:v) as the eluent to afford product **4a** in 76% yield (73.4 mg).

Replacing HOTf with HOTs·H<sub>2</sub>O, only 41% yield of **4a** was isolated along with 40% of **3a** recovered.

The same procedure was followed without HOTf, no desired product **4a** was detected along with over 90% of **3a** recovered.

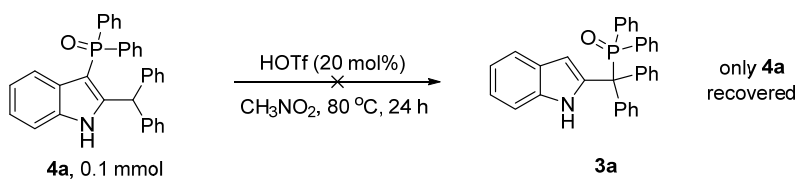

To a 5.0 mL vial was added successively **4a** (48.3 mg, 0.1 mmol), 1.0 mL anhydrous CH<sub>3</sub>NO<sub>2</sub> and HOTf (3.0 mg, 20 mol%) which was prepared as a solution in CH<sub>3</sub>NO<sub>2</sub>, the reaction mixture was stirred at 80 °C for 24 hours. No product **3a** was observed along with almost **4a** recovered.

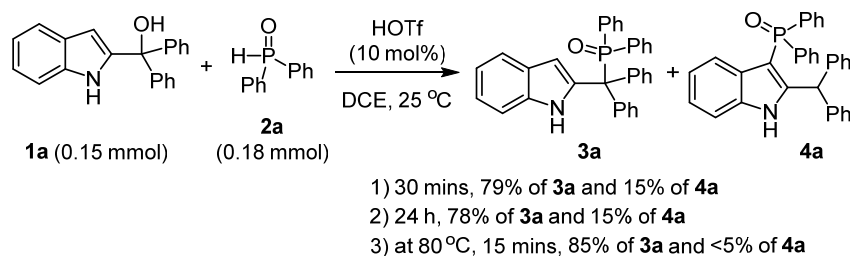

To a 5-mL vial were added 2-indolylmethanol **1a** (0.15 mmol, 1.0 equiv), Ph<sub>2</sub>P(O)H **2a** (0.18 mmol, 1.2 equivs) and 1.0 mL of anhydrous ClCH<sub>2</sub>CH<sub>2</sub>Cl. After adding HOTf (2.3 mg, 10 mol%) which was prepared as a solution in ClCH<sub>2</sub>CH<sub>2</sub>Cl, the reaction mixture was stirred at room temperature for 24 hours. The reaction mixture was directly subjected to column chromatography using petrol ether/ethyl acetate (generally 10:1 to 3:1, v:v) as the eluent to afford products **3a** and **4a** in 78% and 15% yield.

The same procedure was followed by running the reaction at 80 °C for 15 minutes, **3a** was isolated in 85% yield and **4a** was generated with less than 5% yield.

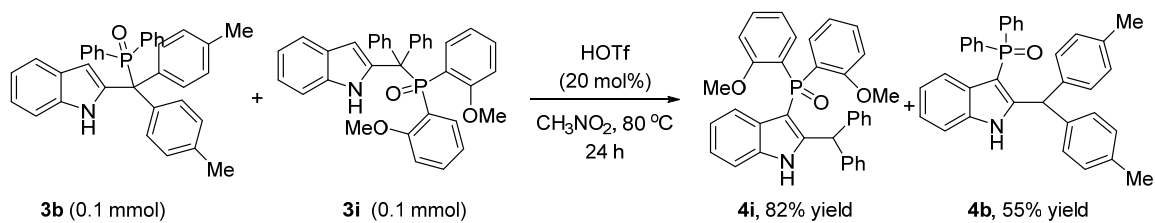

To a 5.0 mL vial was added successively **3b** (51.1 mg, 0.1 mmol), **3i** (54.3 mg, 0.1 mmol), 1.0 mL anhydrous CH<sub>3</sub>NO<sub>2</sub> and HOTf (3.0 mg, 20 mol%) which was prepared as a solution in CH<sub>3</sub>NO<sub>2</sub>, the reaction mixture was stirred at 80 °C until the disappearance of **3b** and **3i**. The reaction mixture was directly subjected to column chromatography using dichloromethane /ethyl acetate (10: to 6:1, v:v) as the eluent to afford product **4i** in 82% yield (44.6 mg) and **4b** in 55% yield (28.2 mg), respectively.

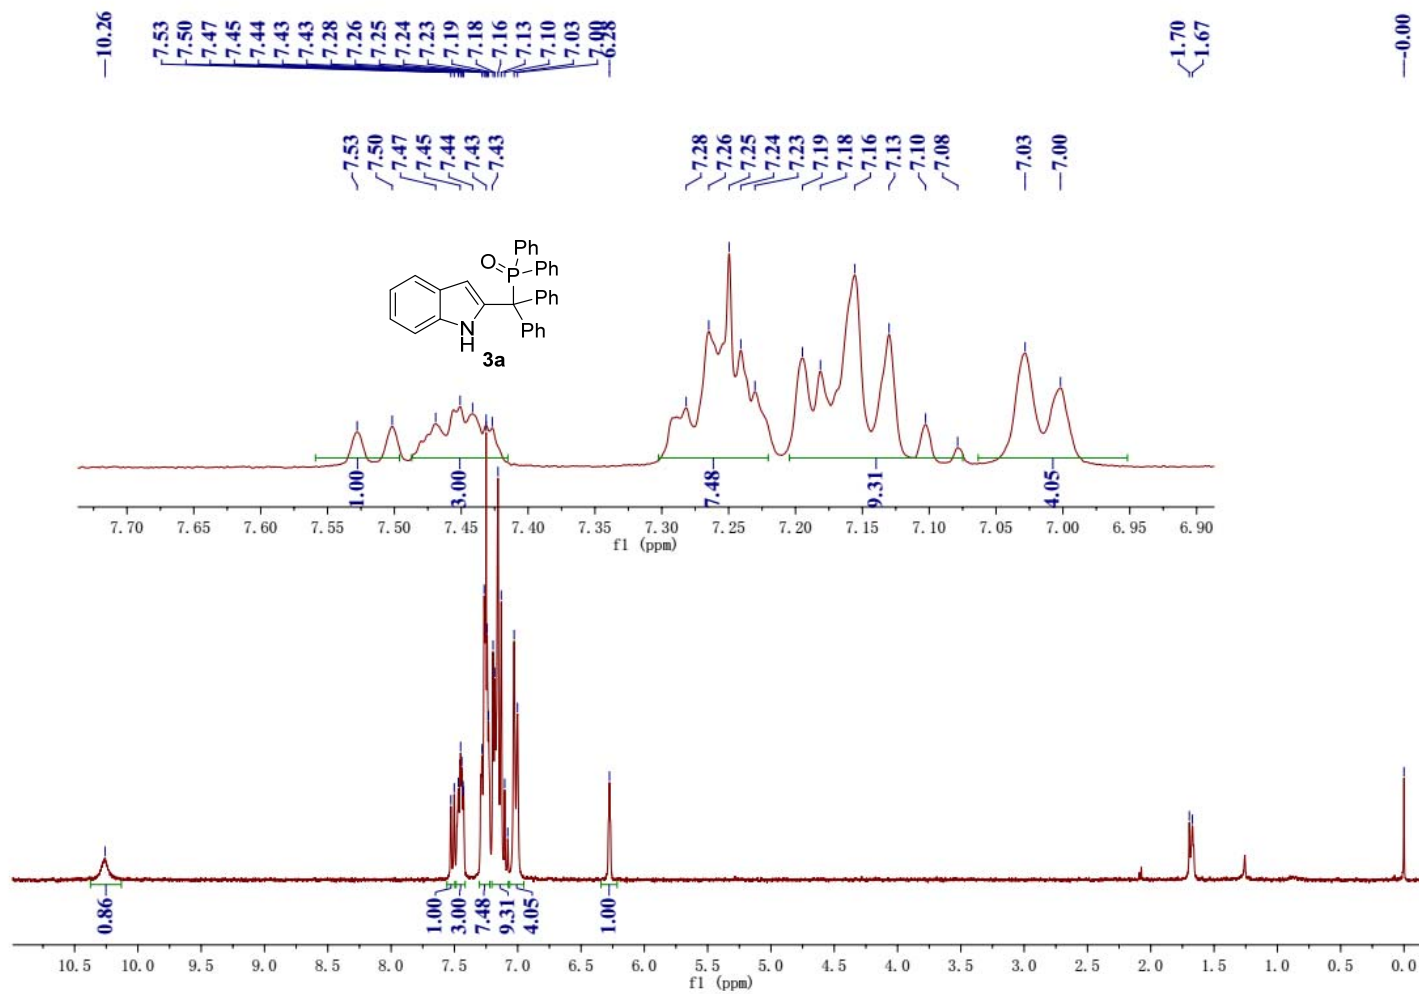

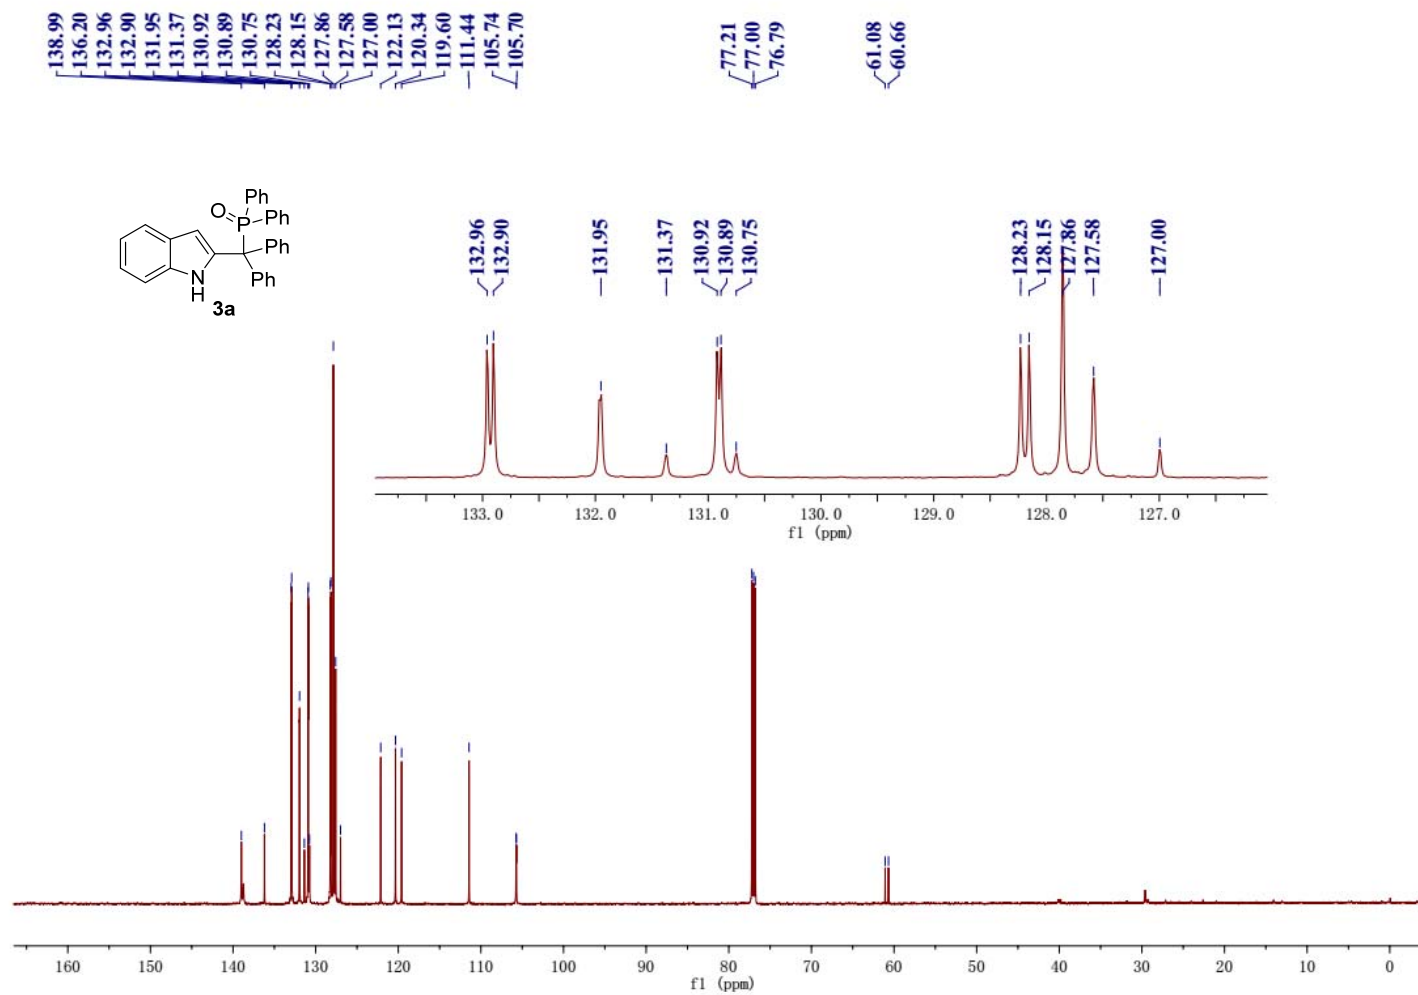

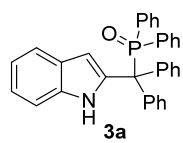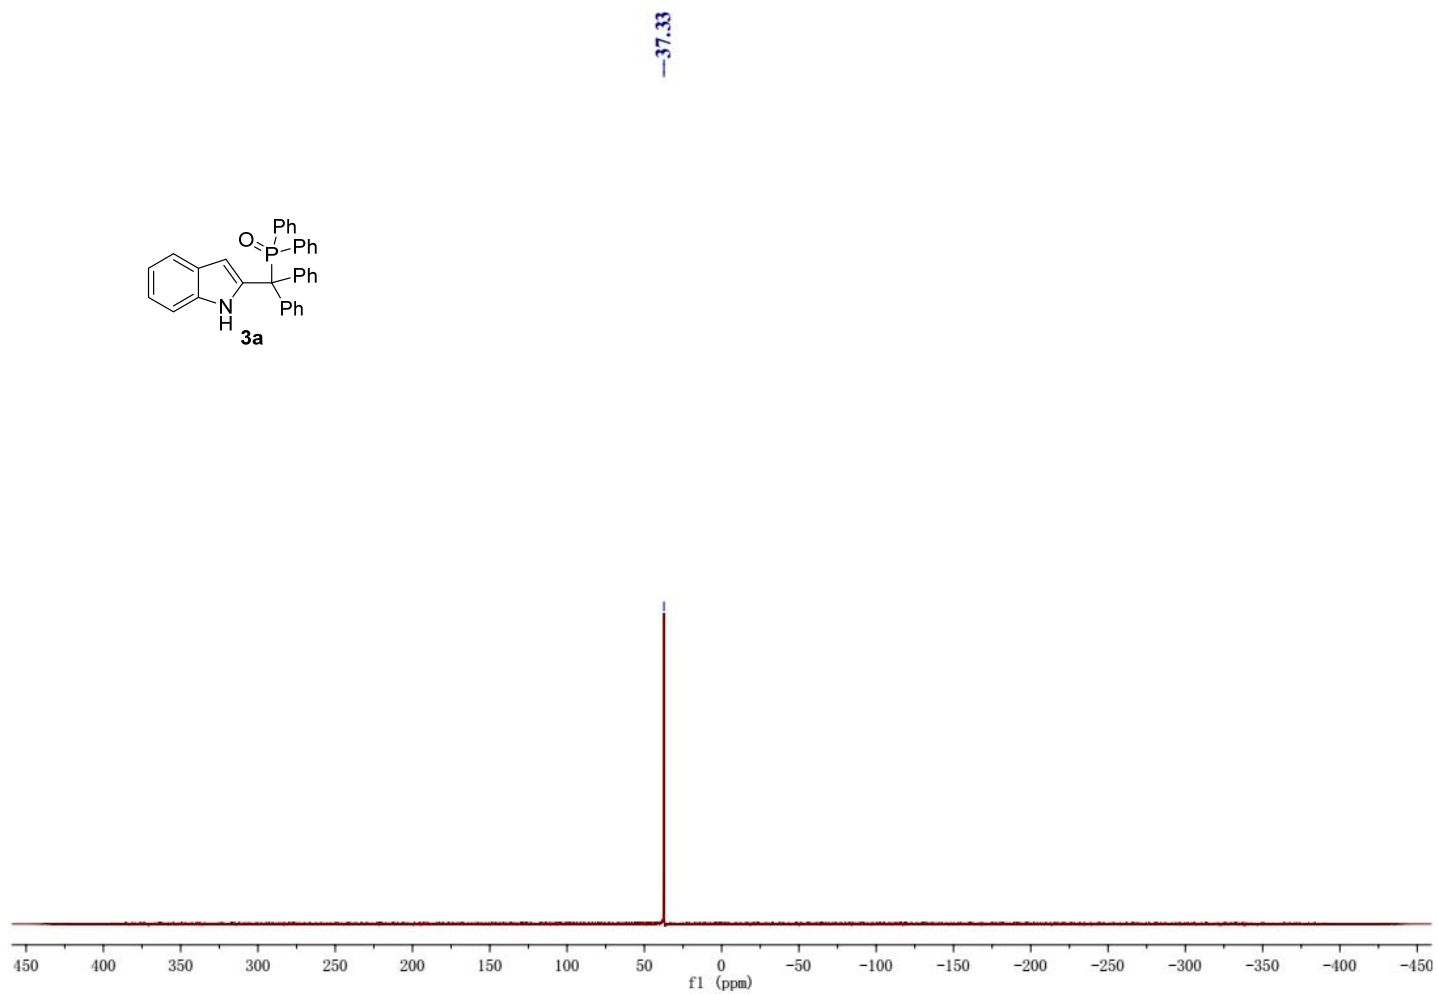

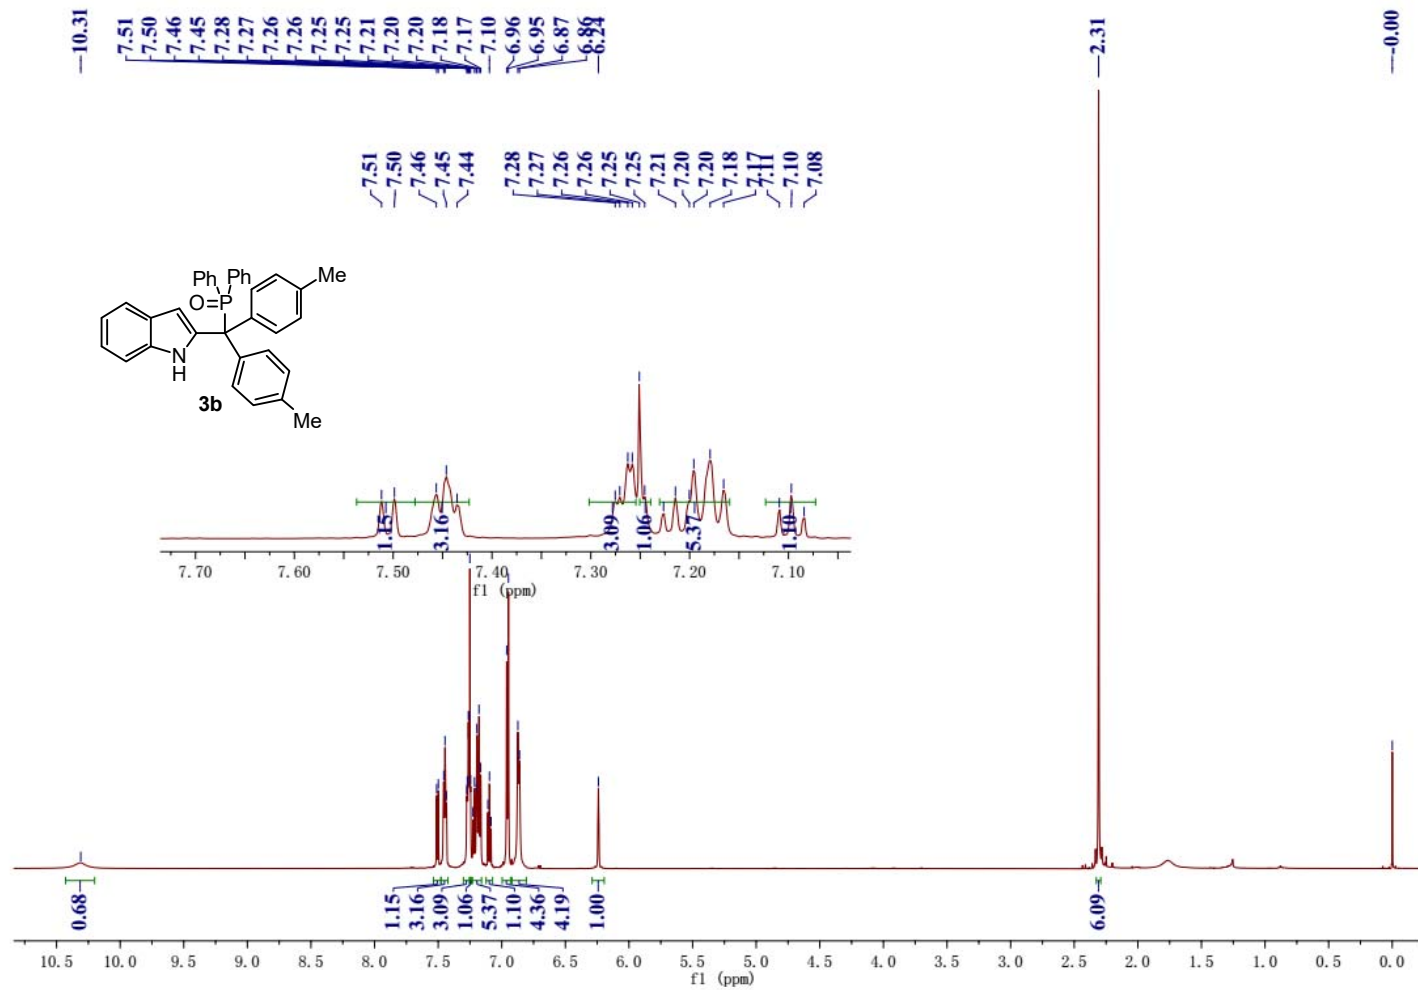

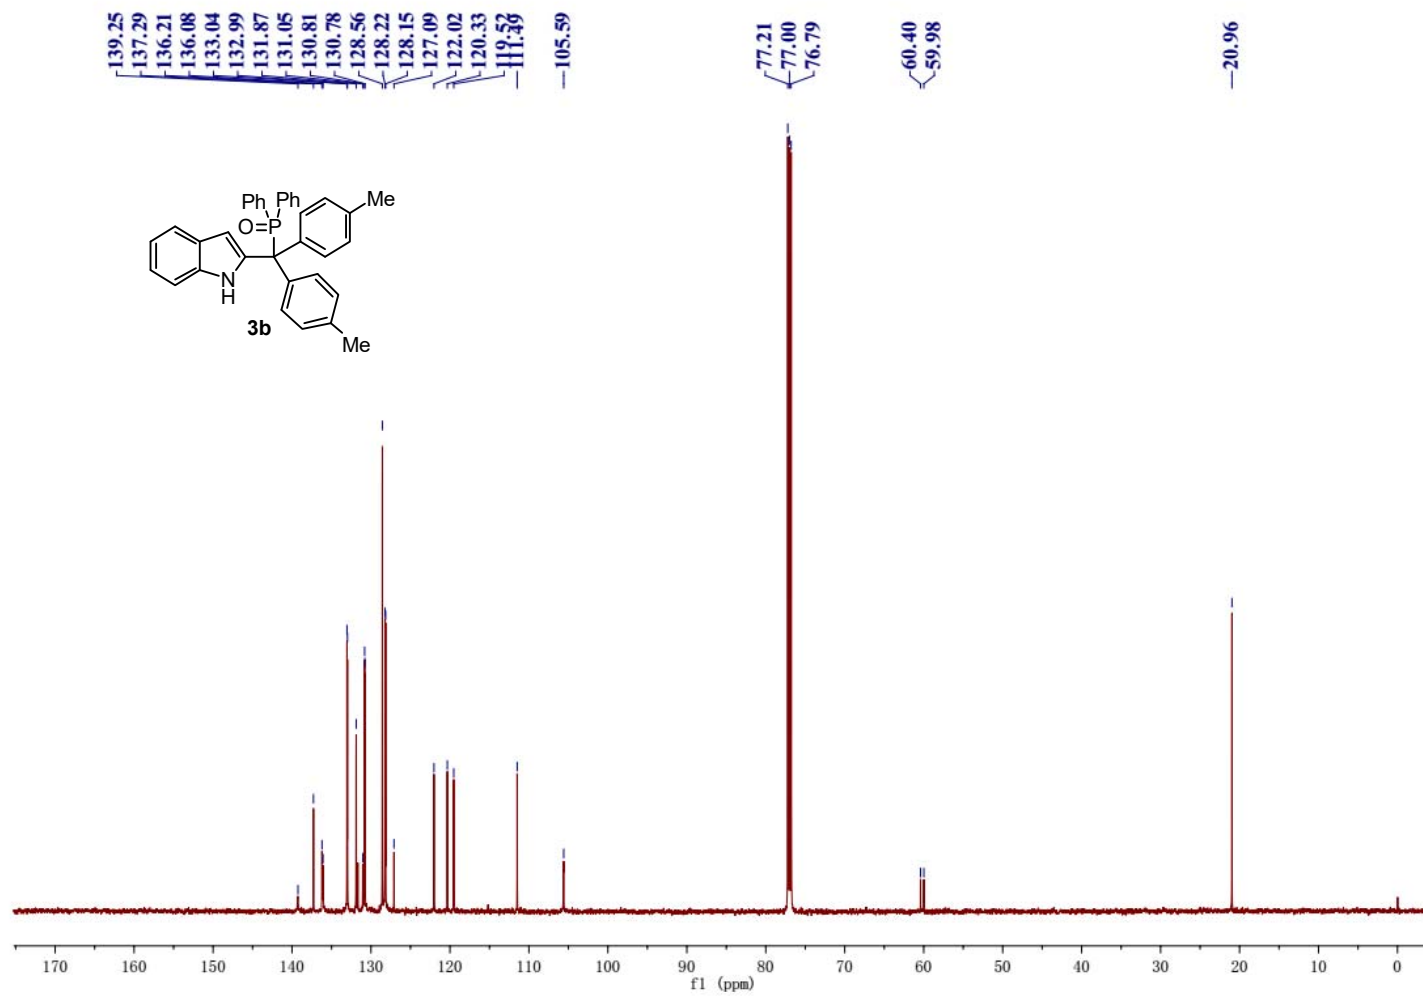

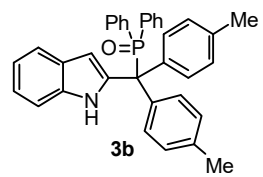

—31.82

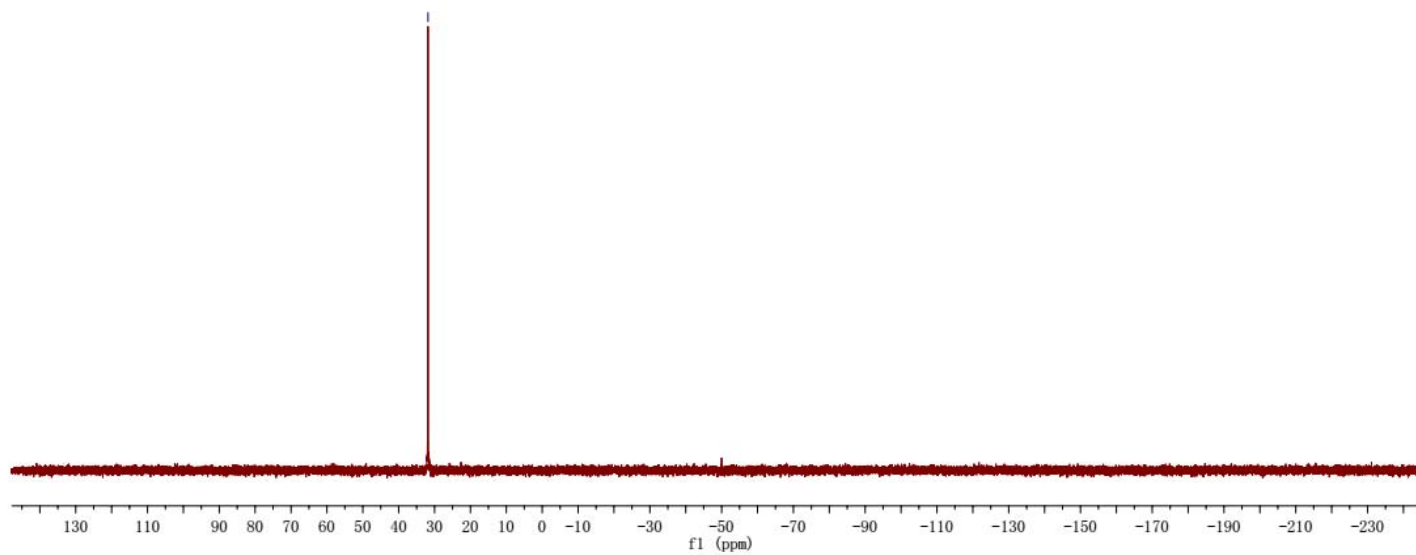



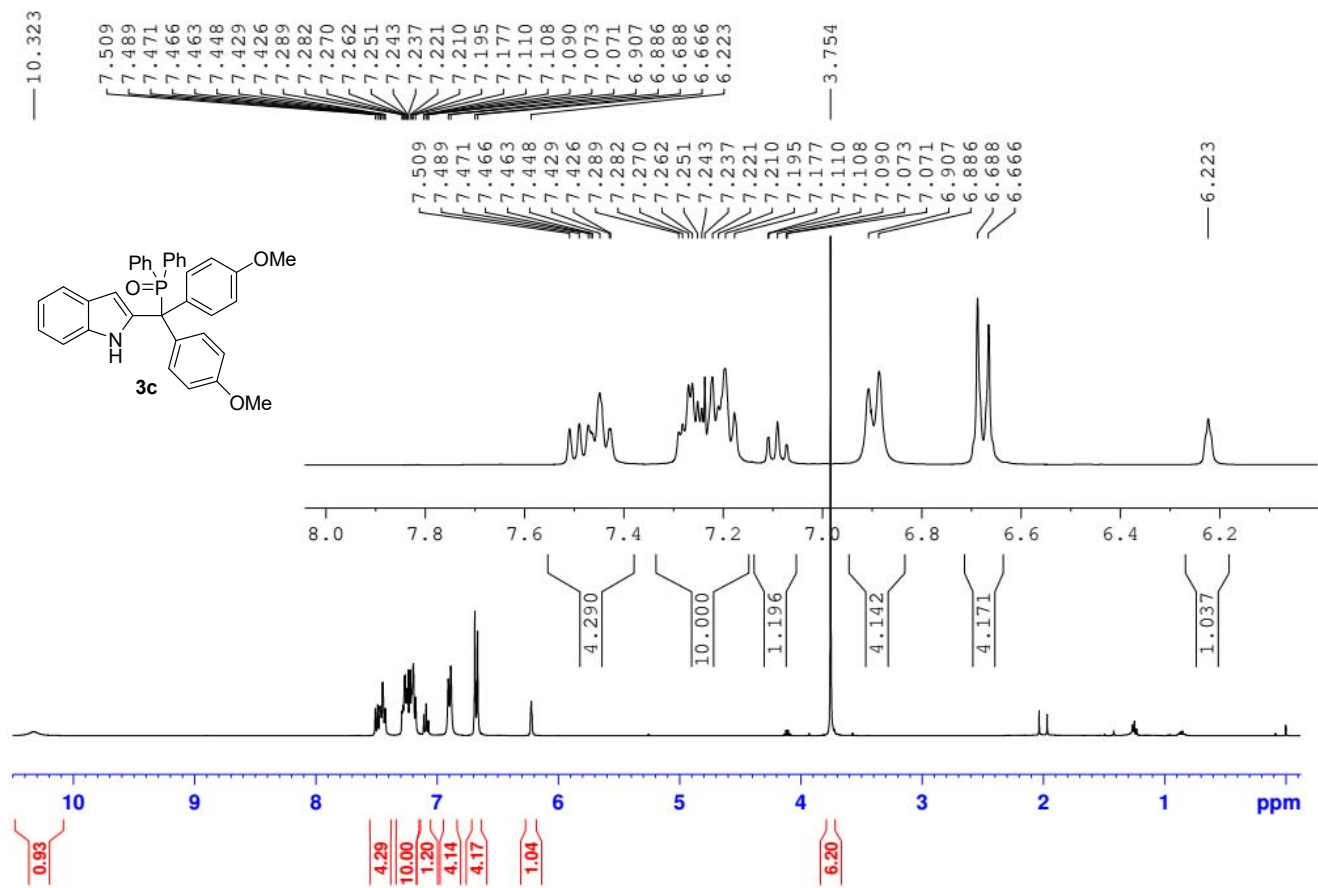

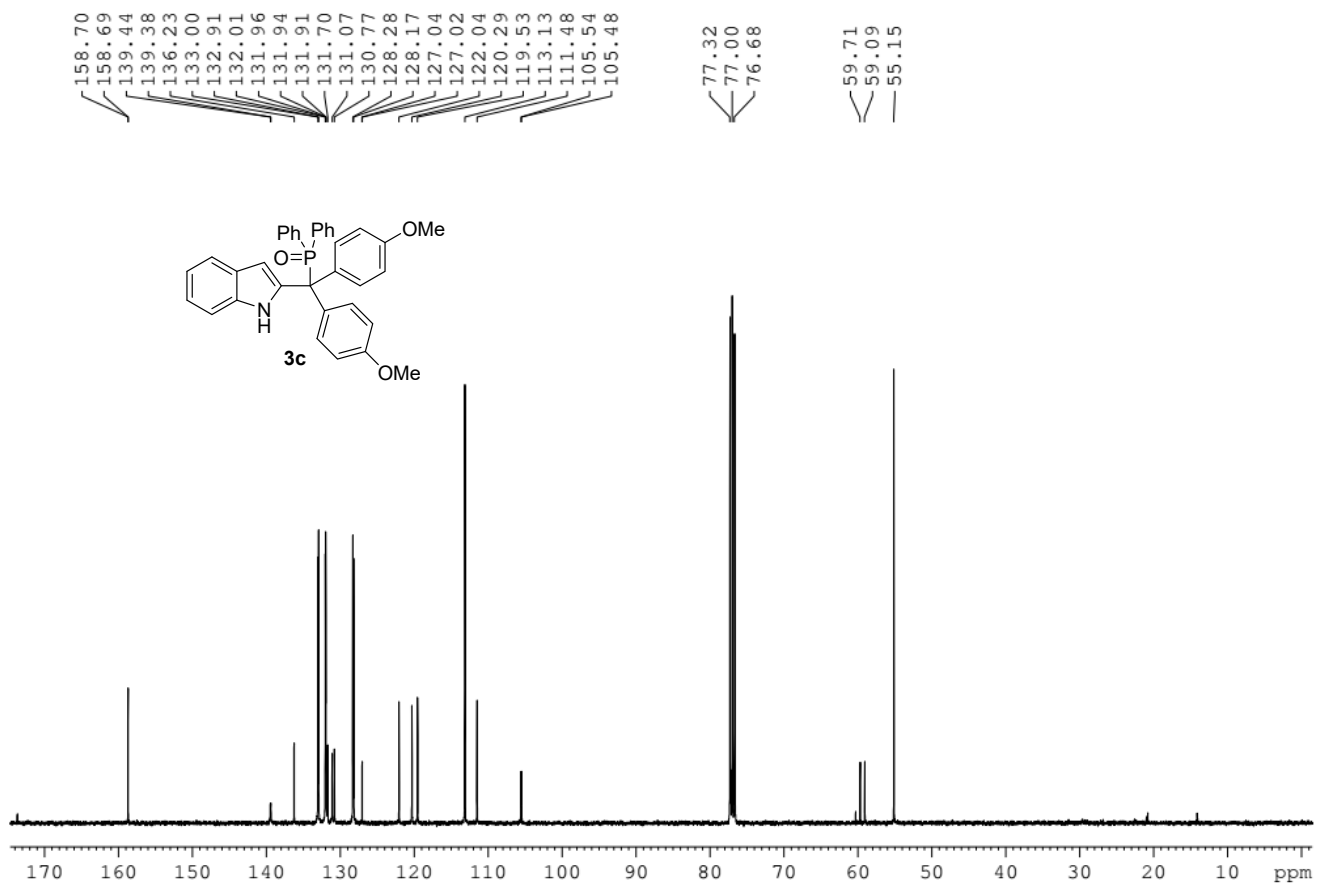

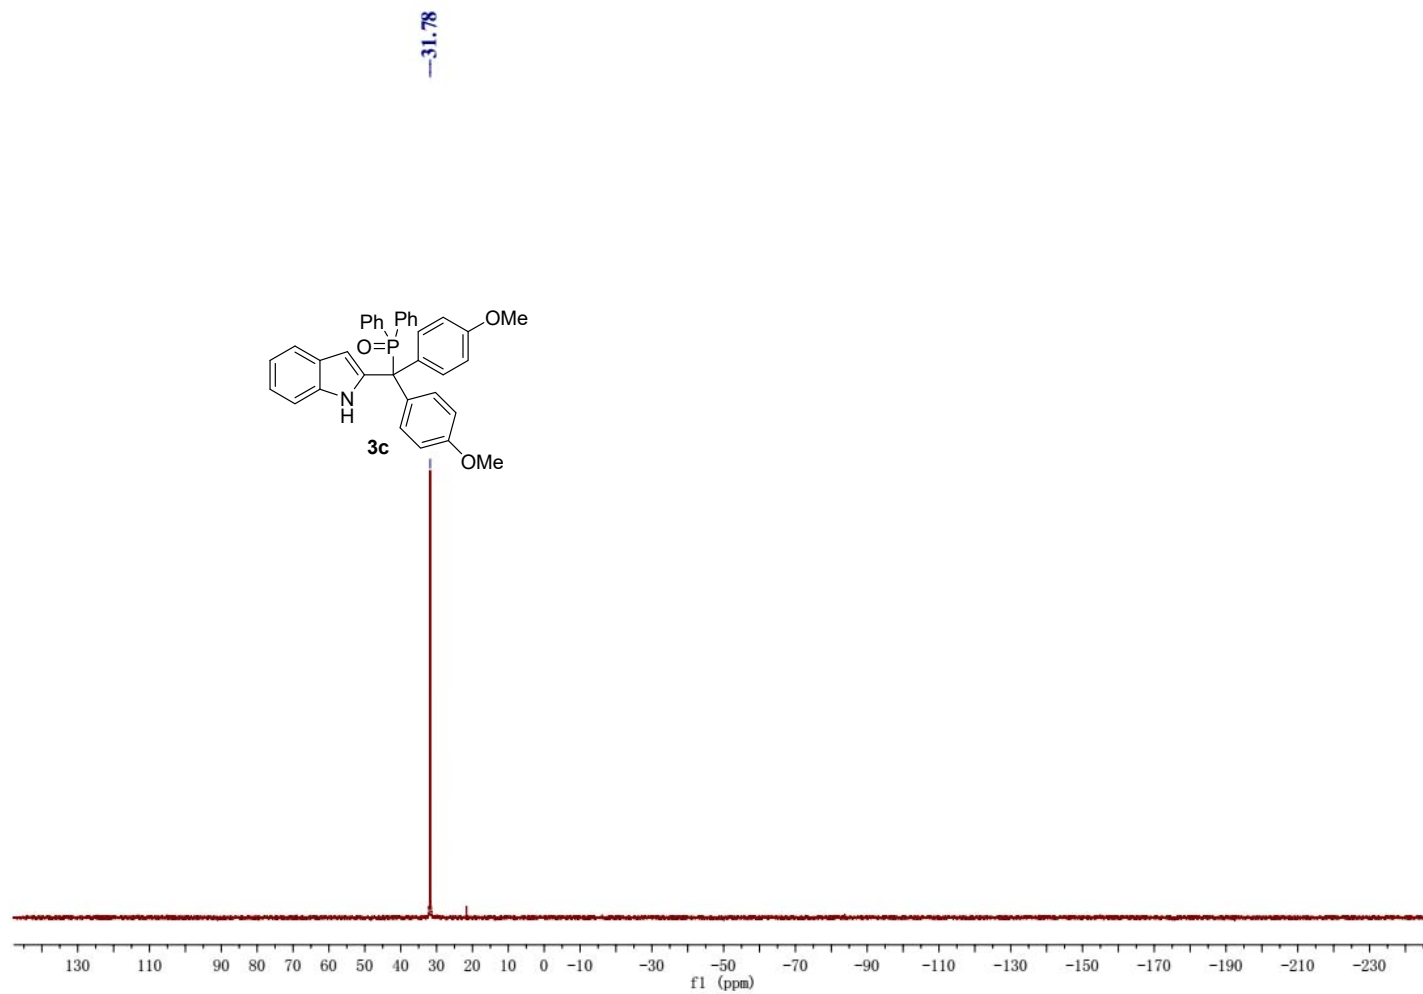

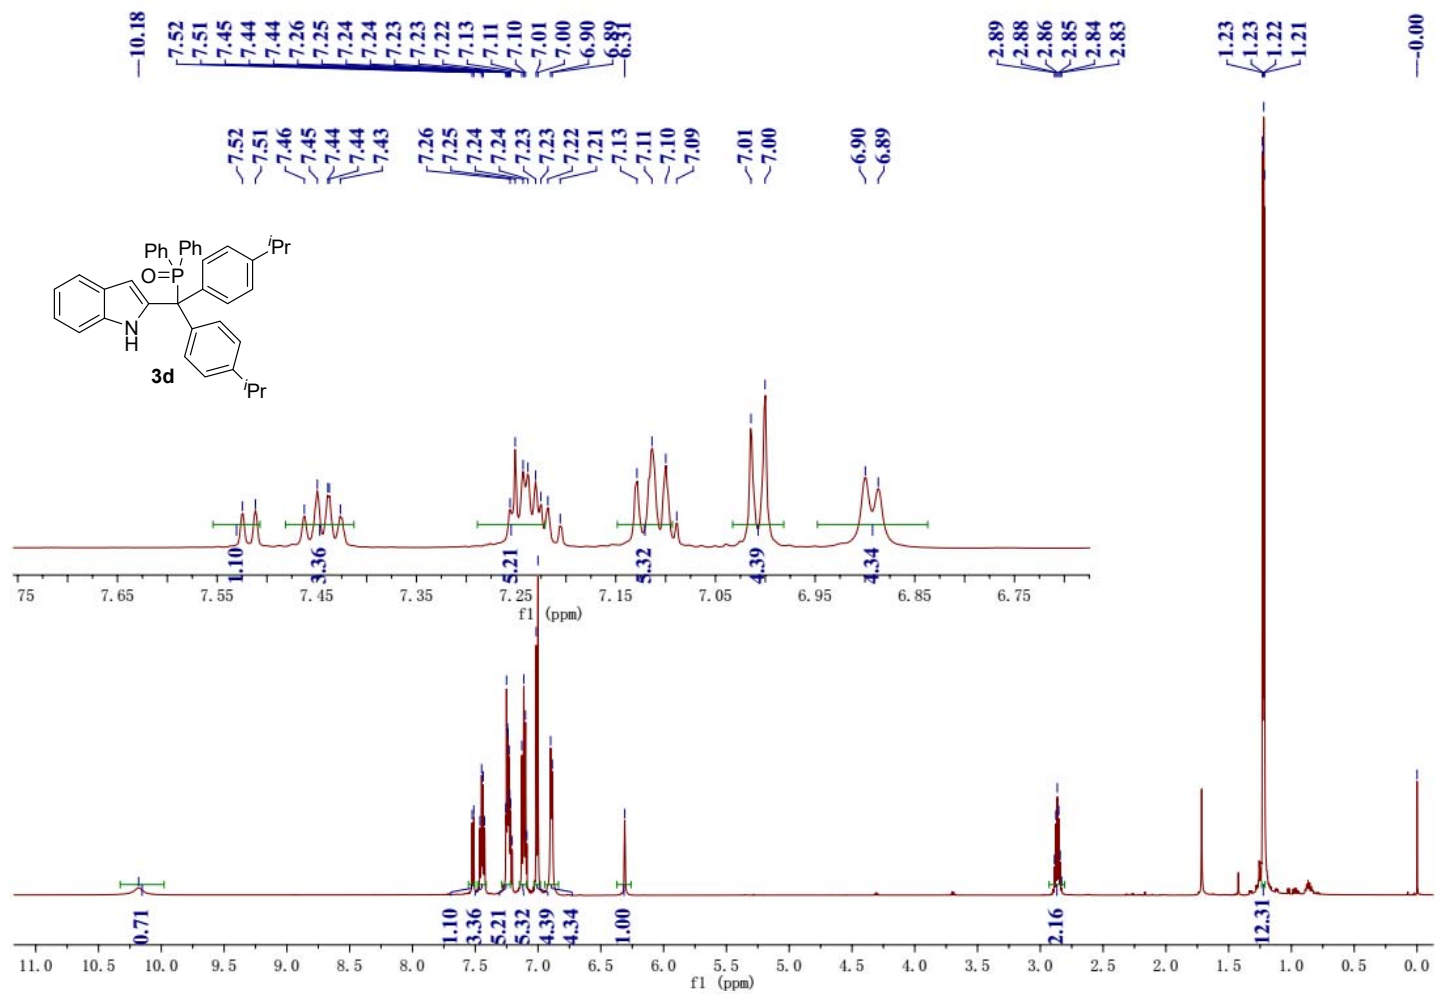

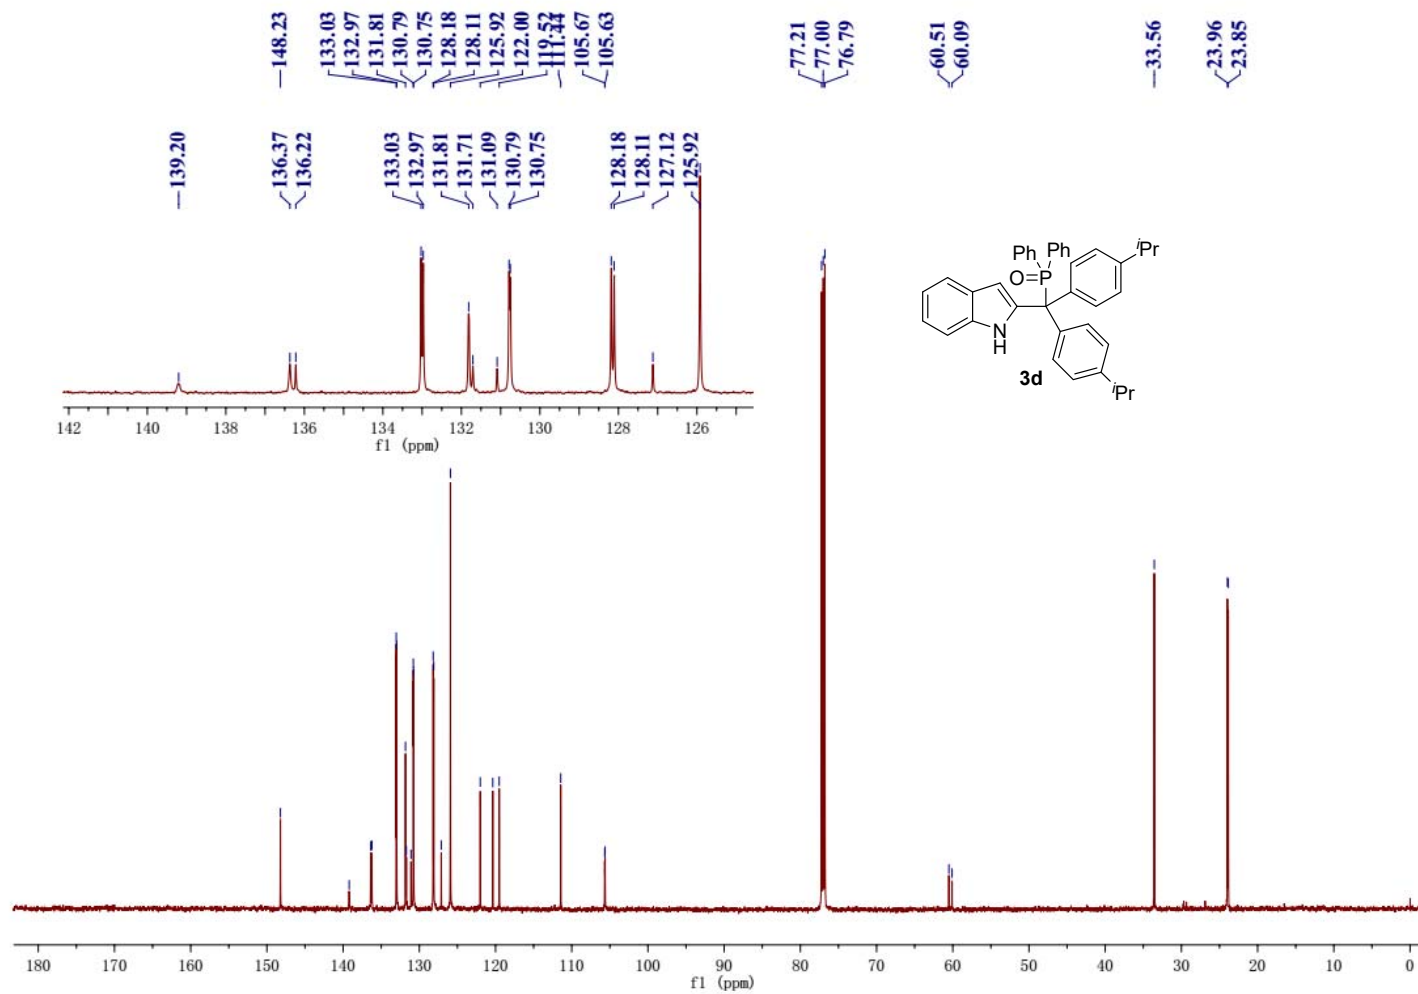

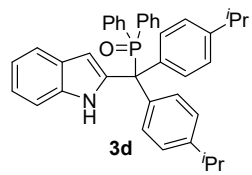

37.29

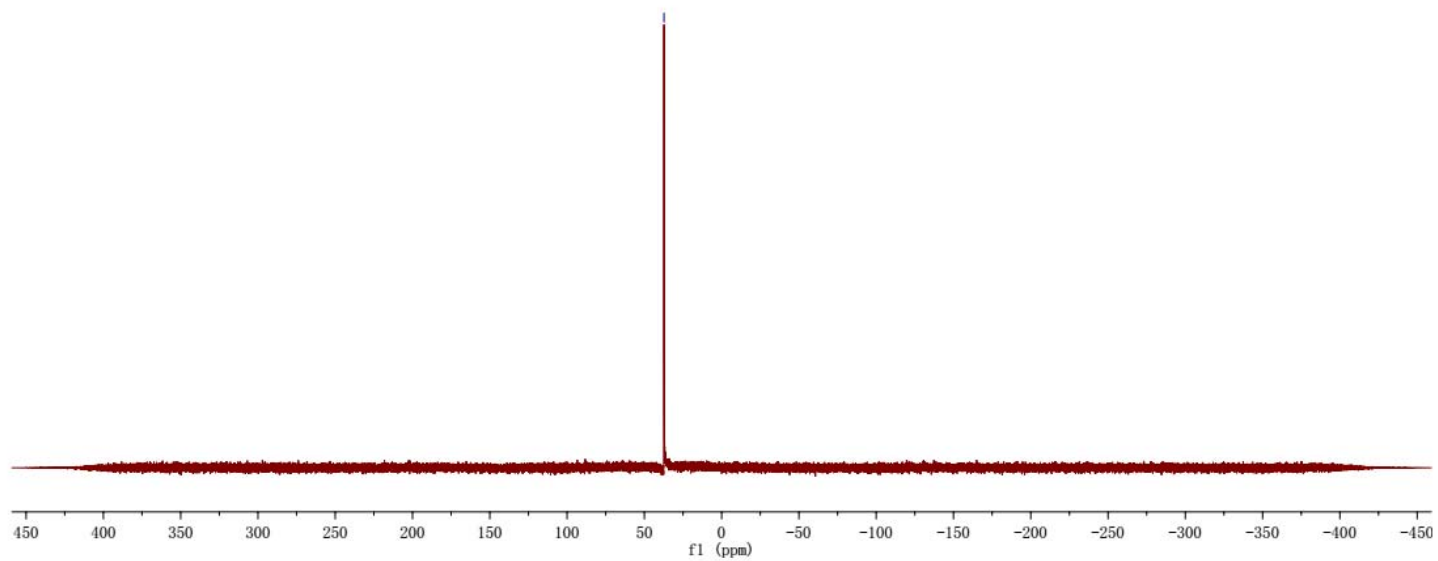

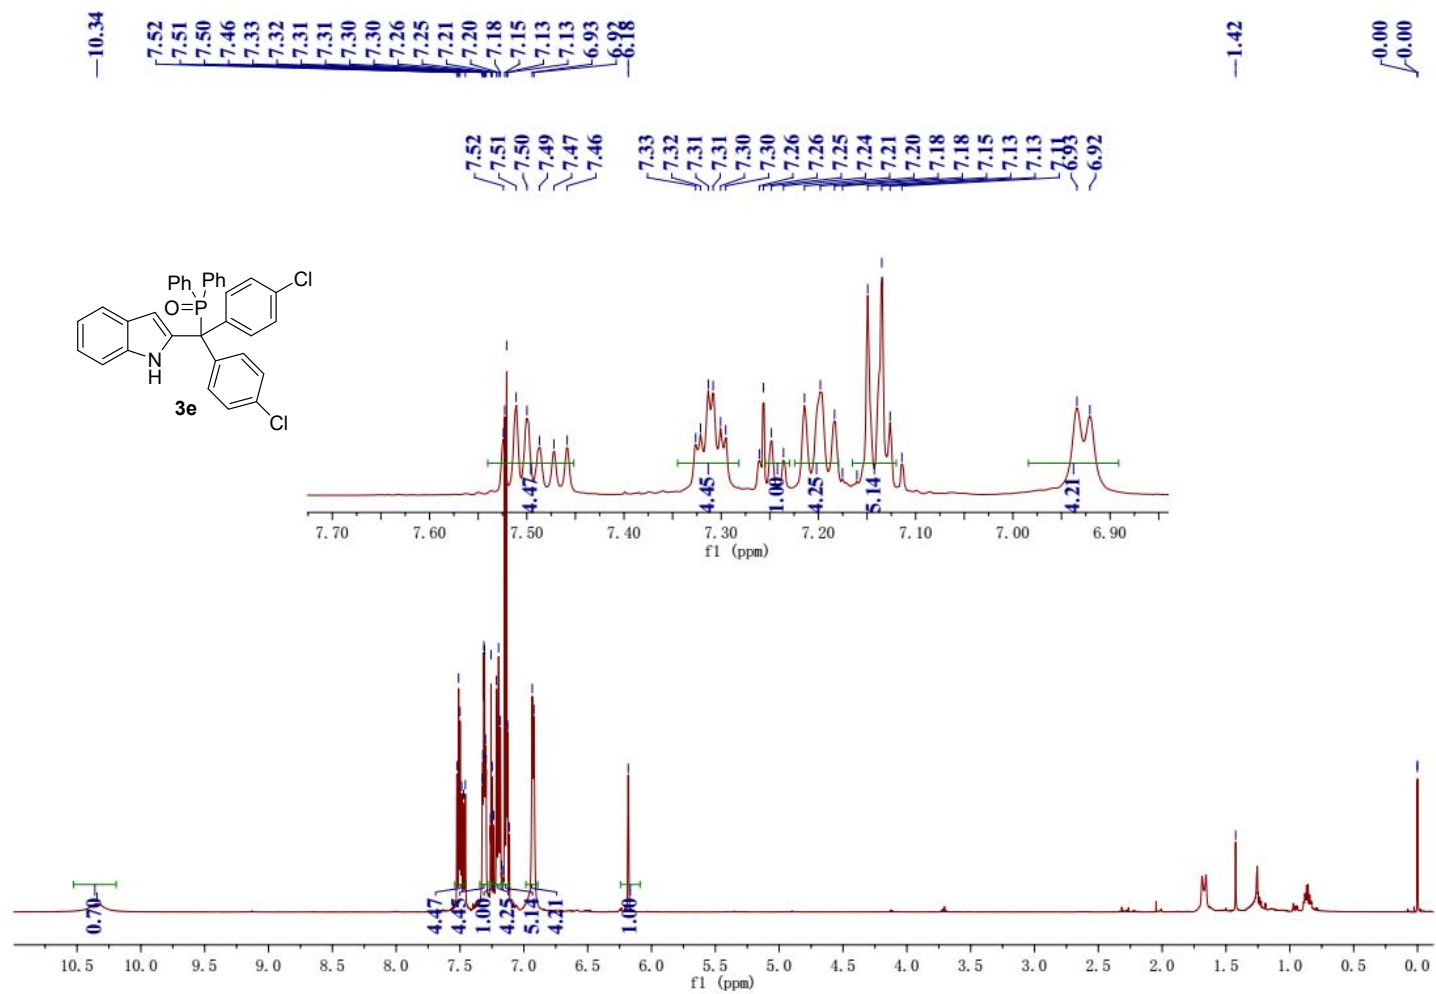

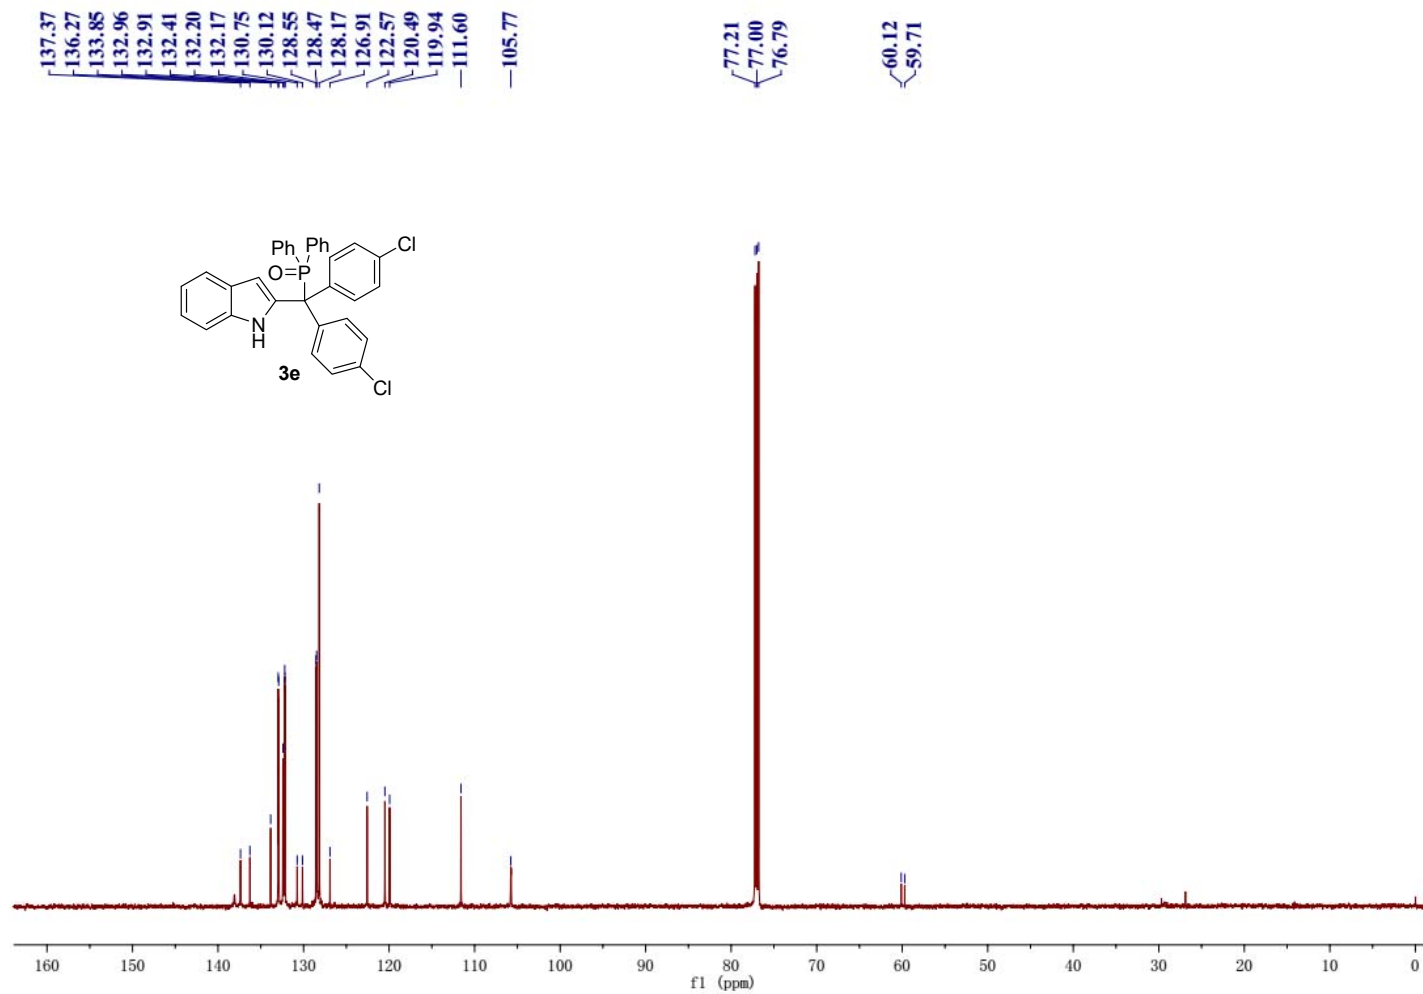



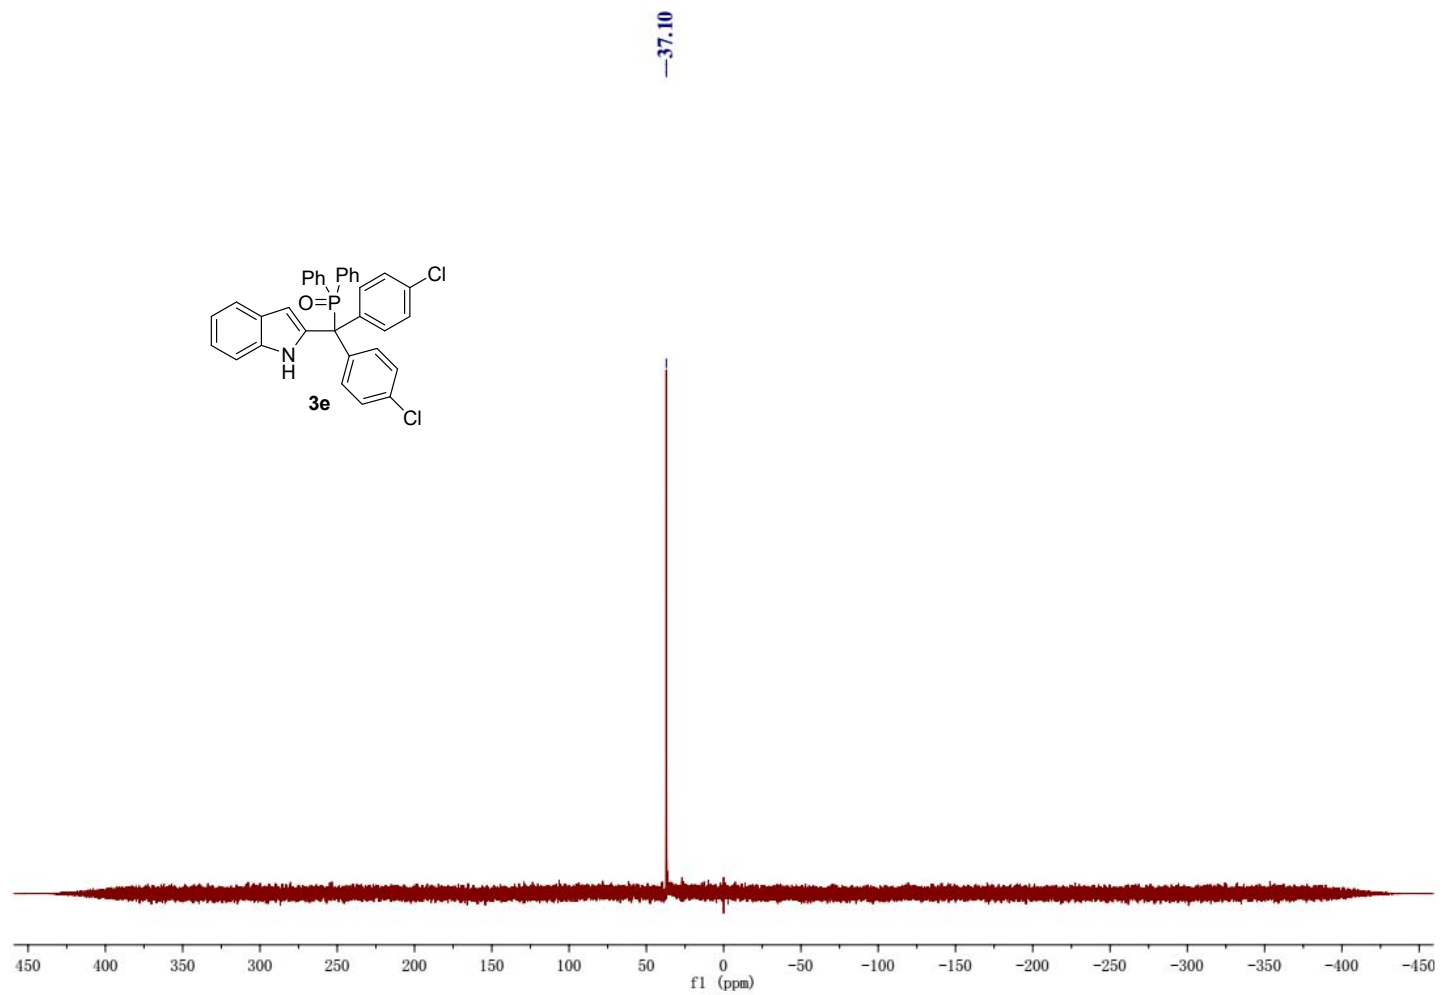

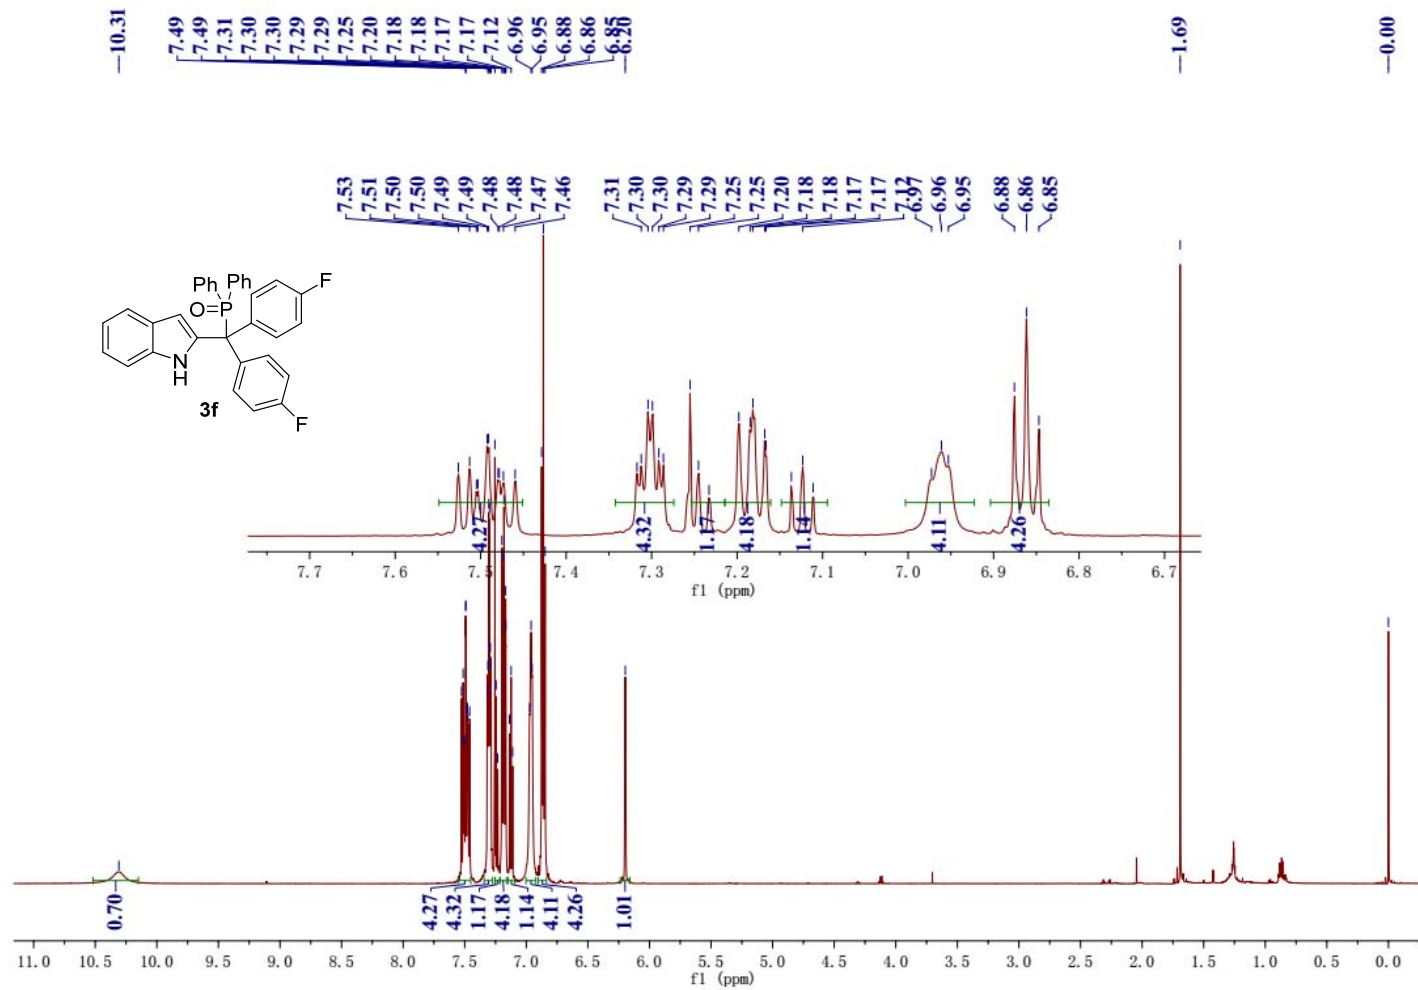

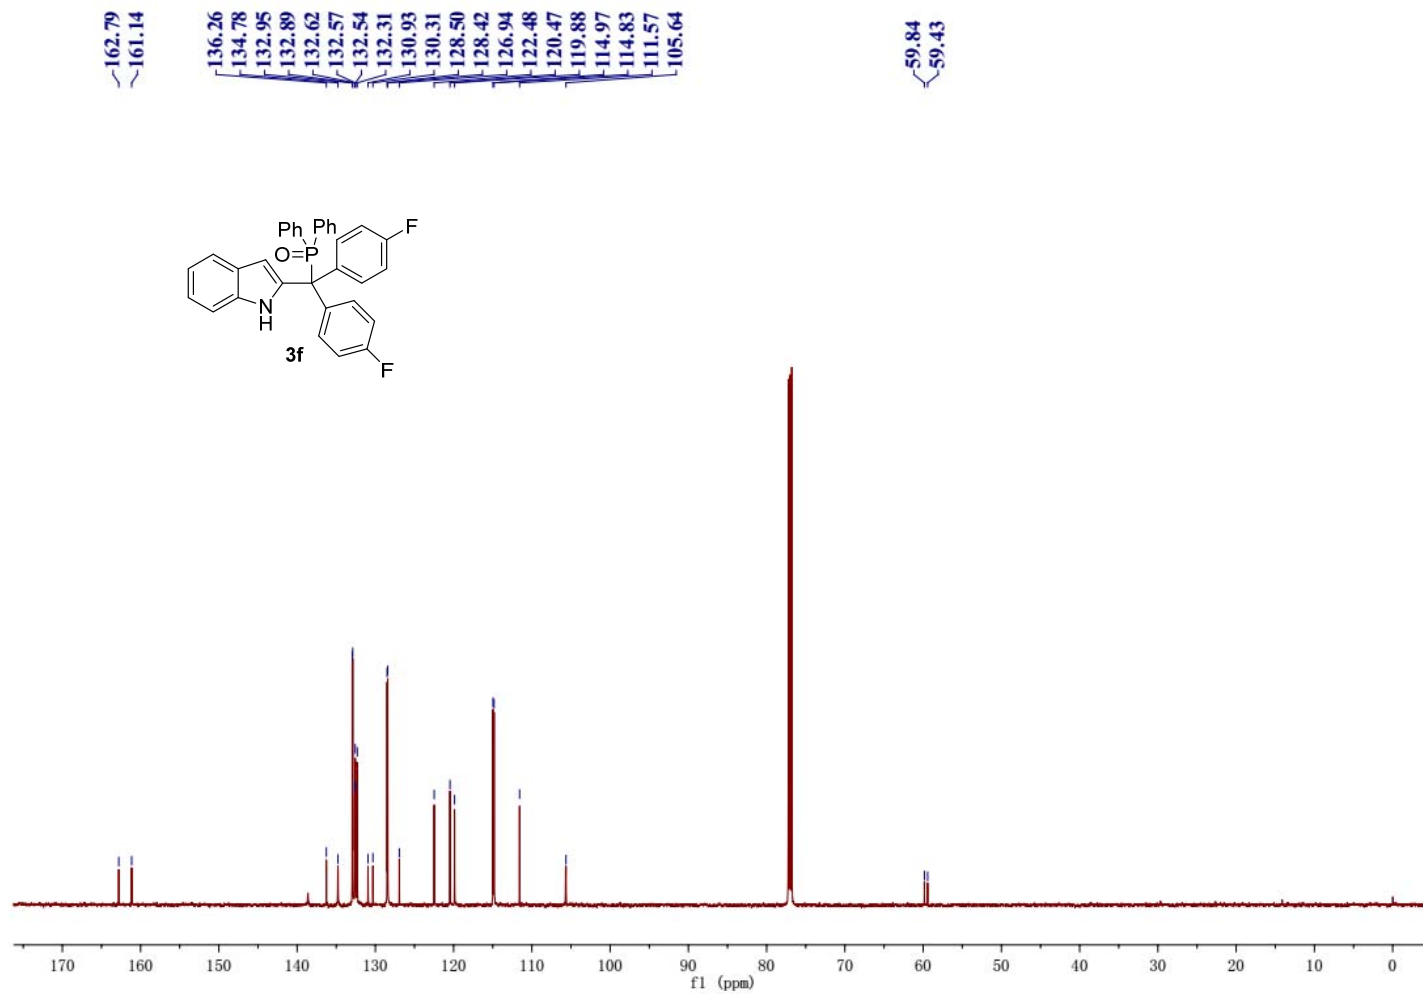

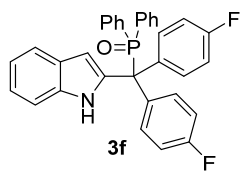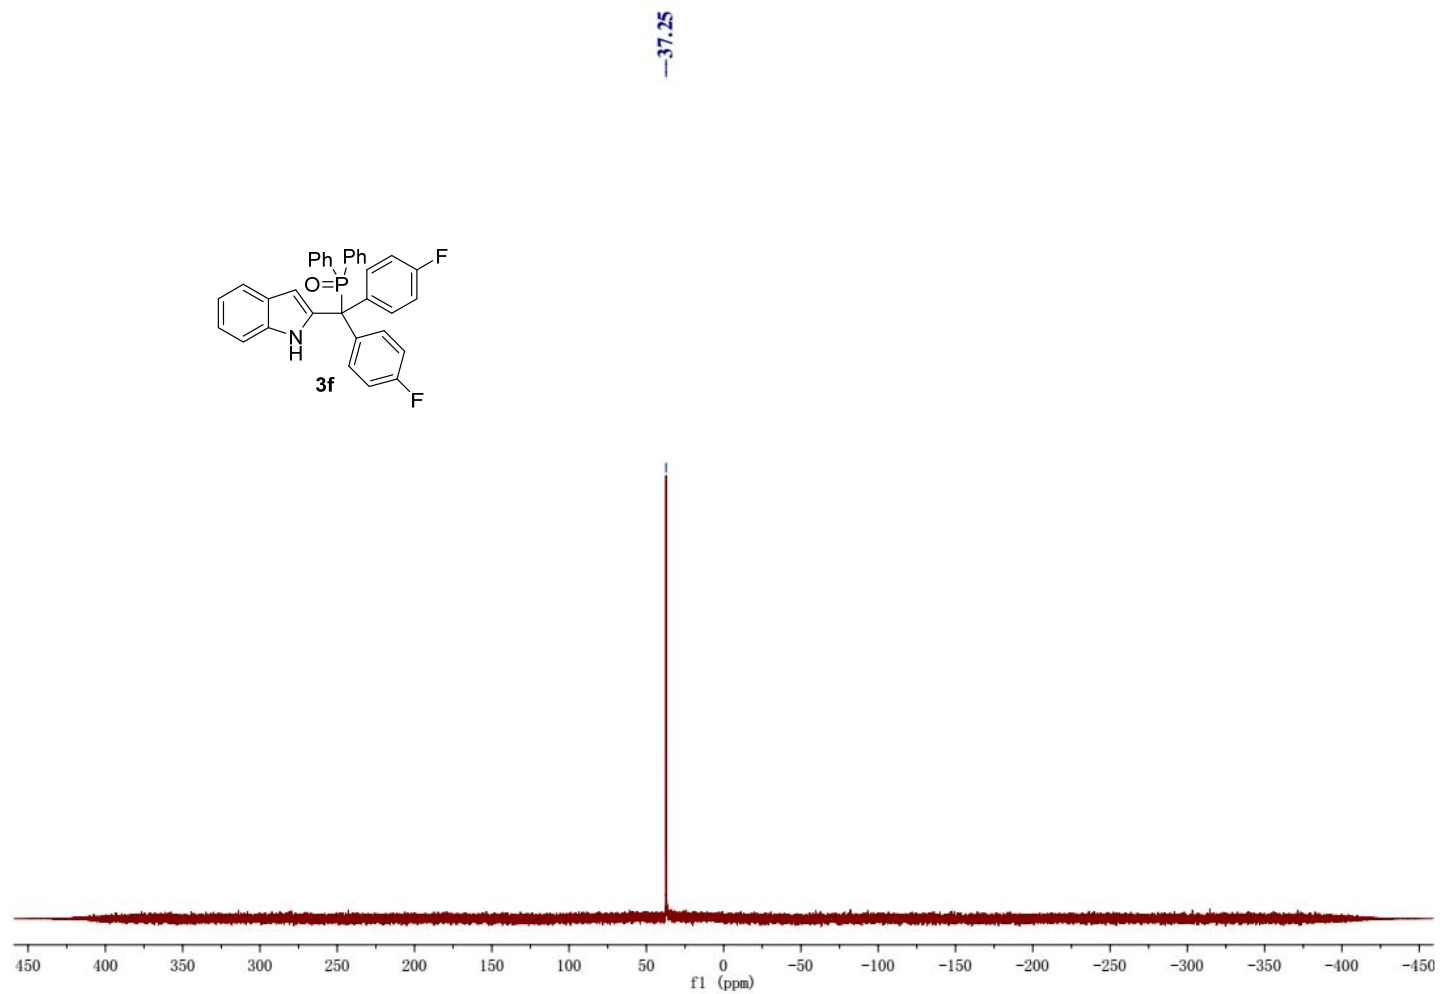

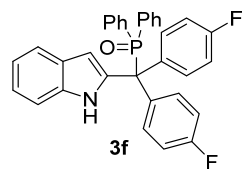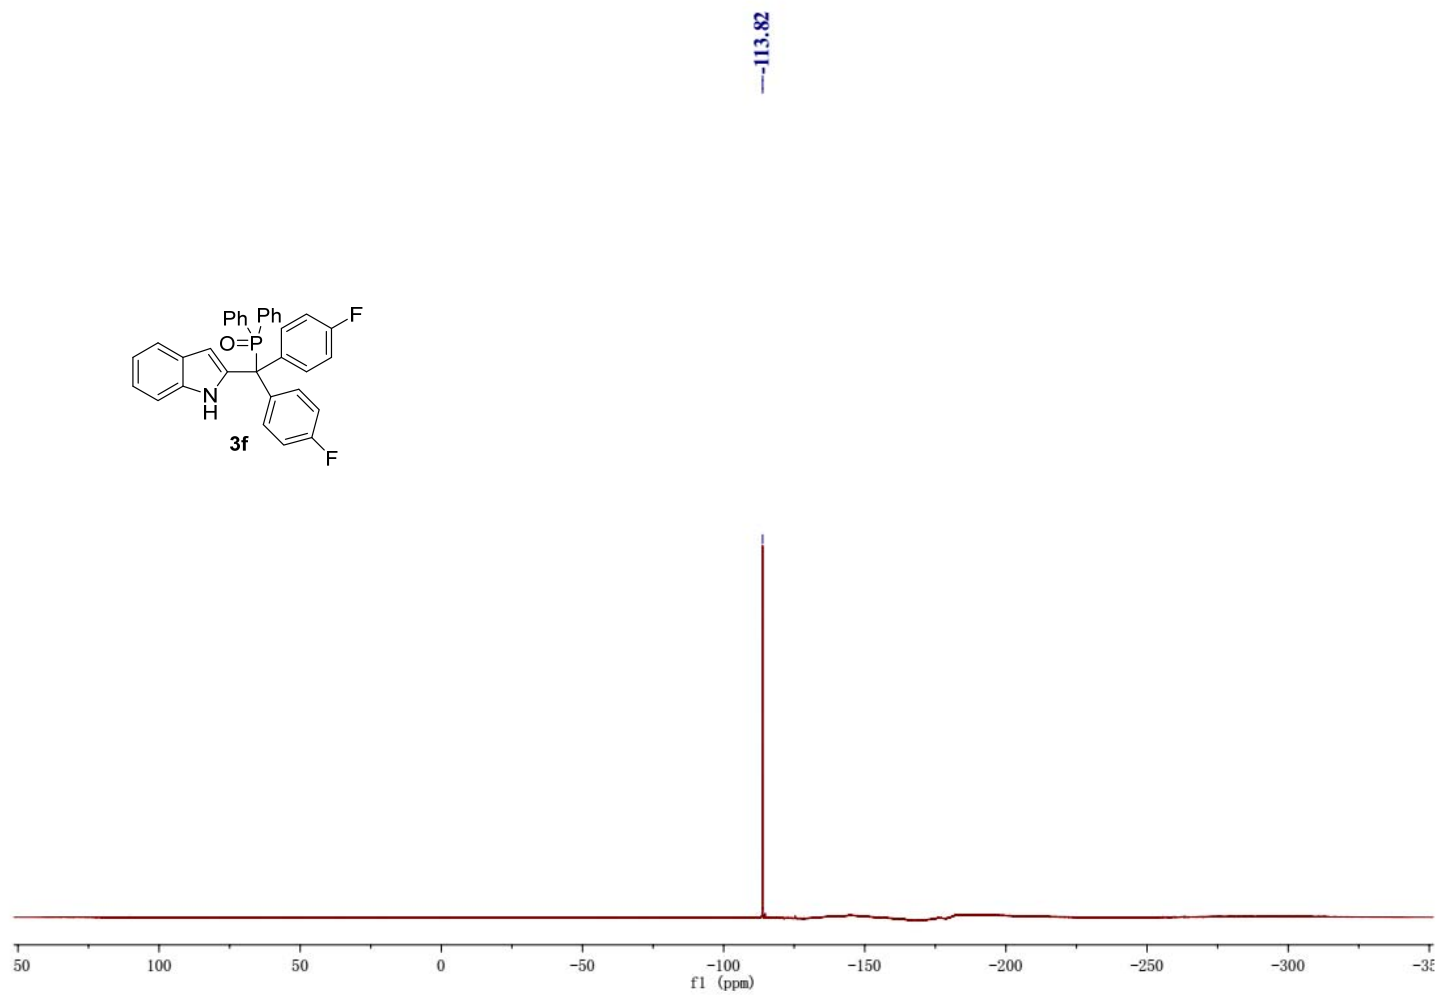

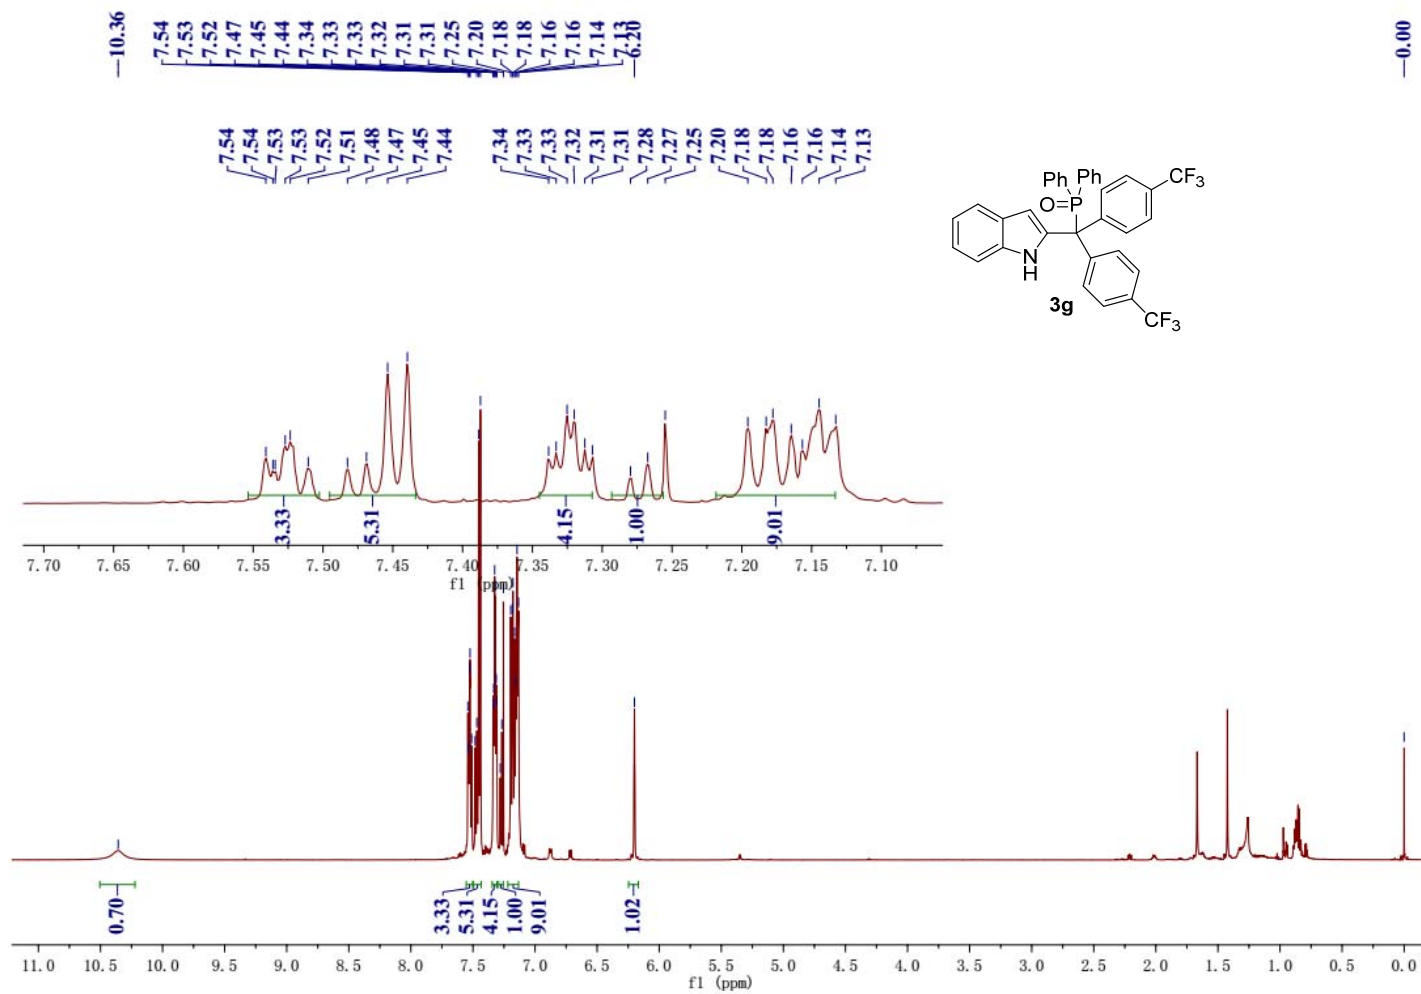

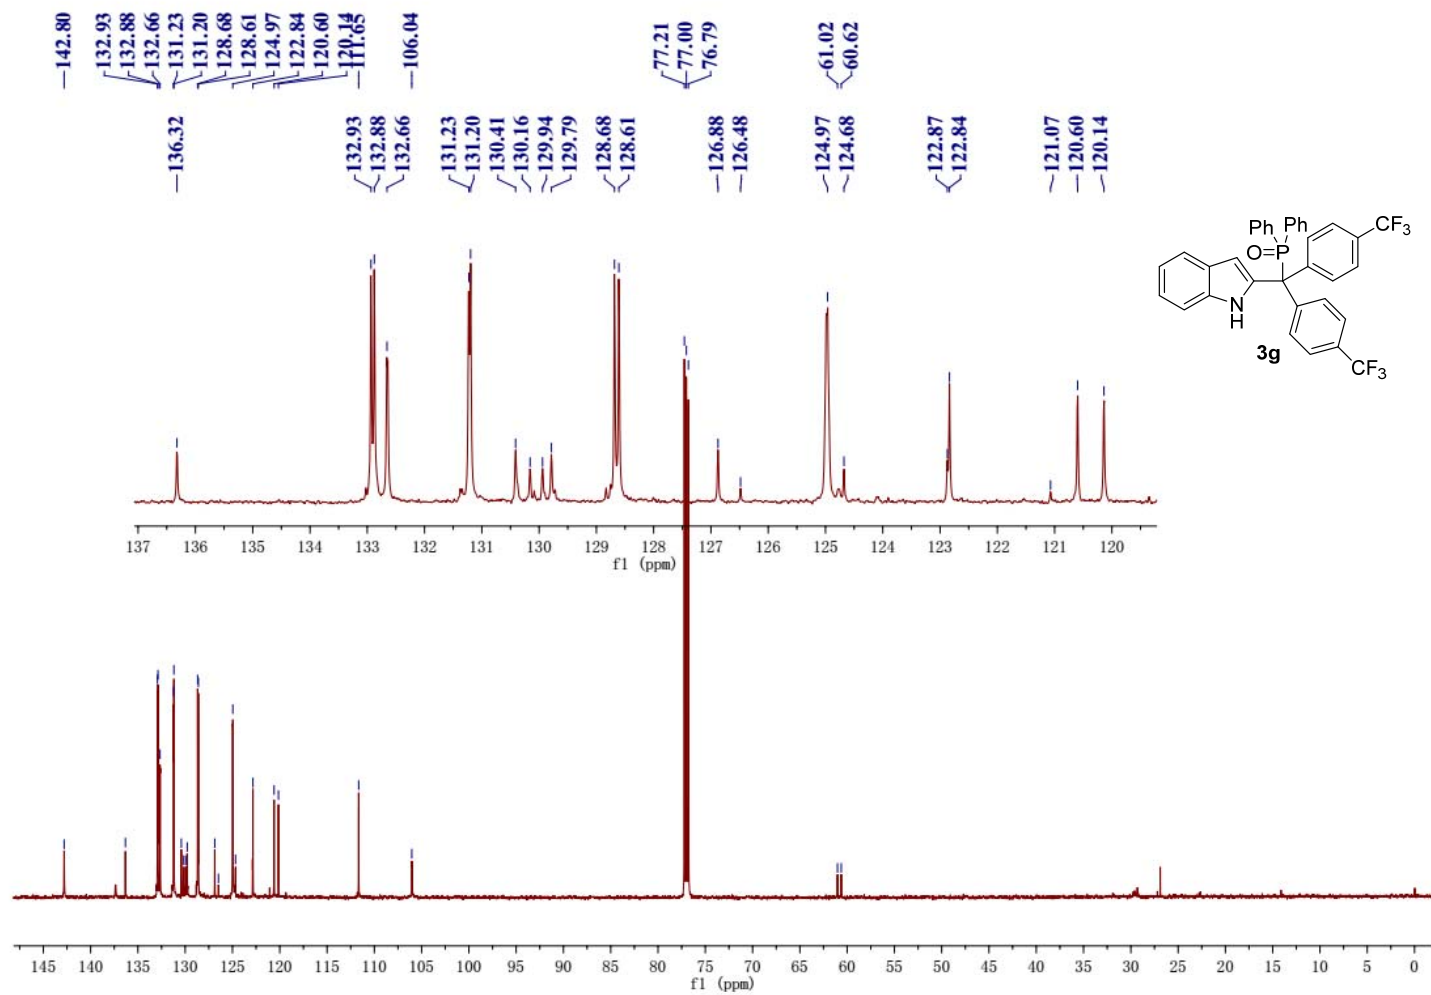

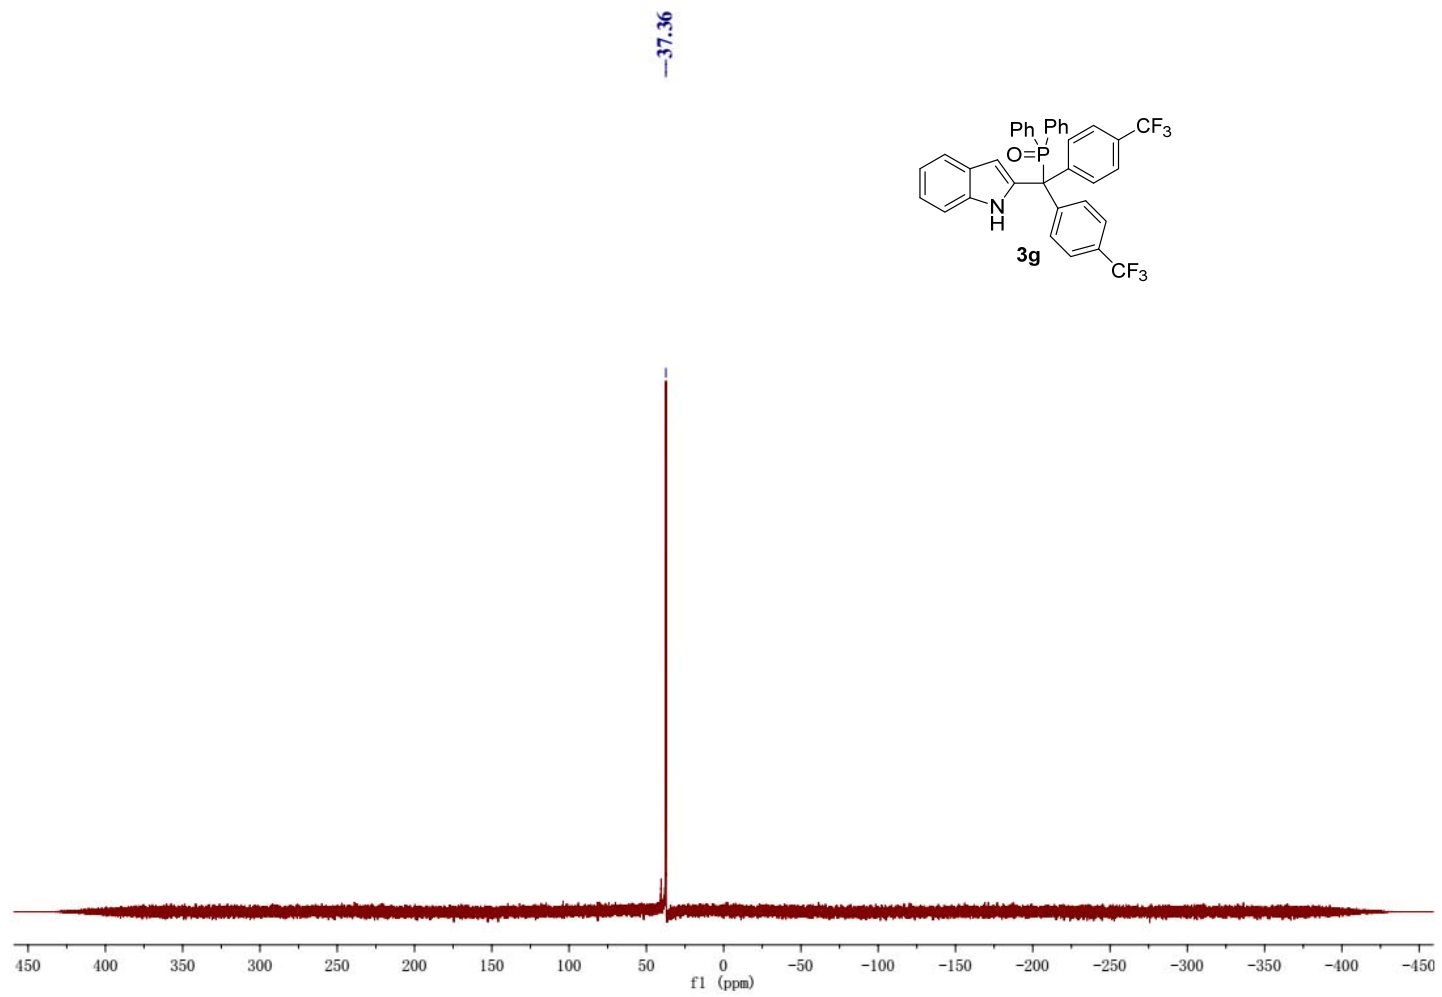



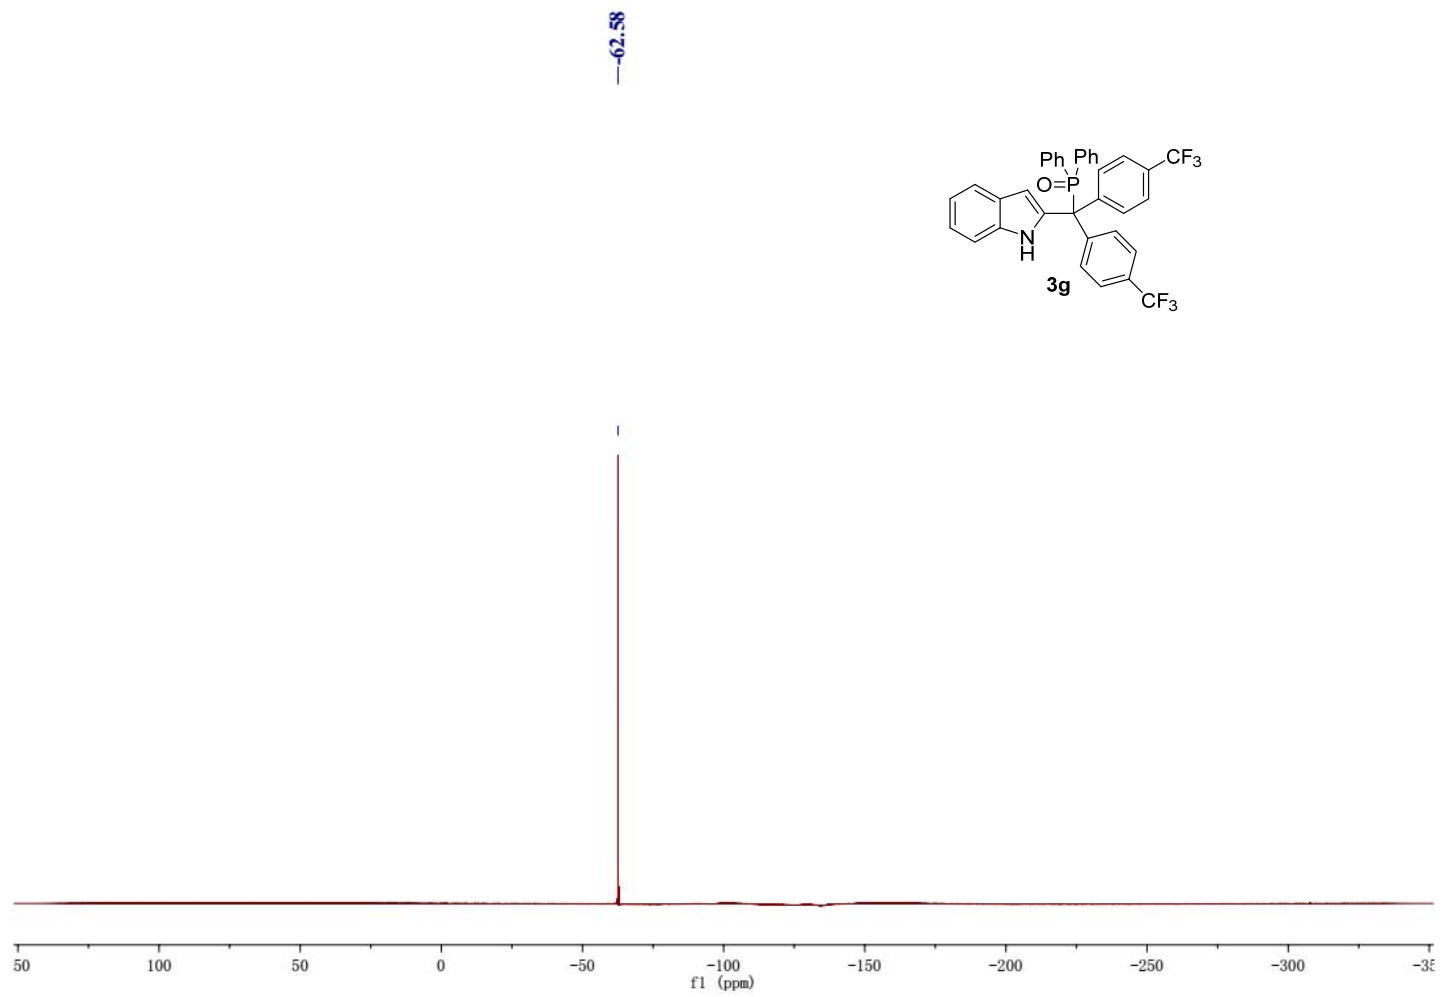

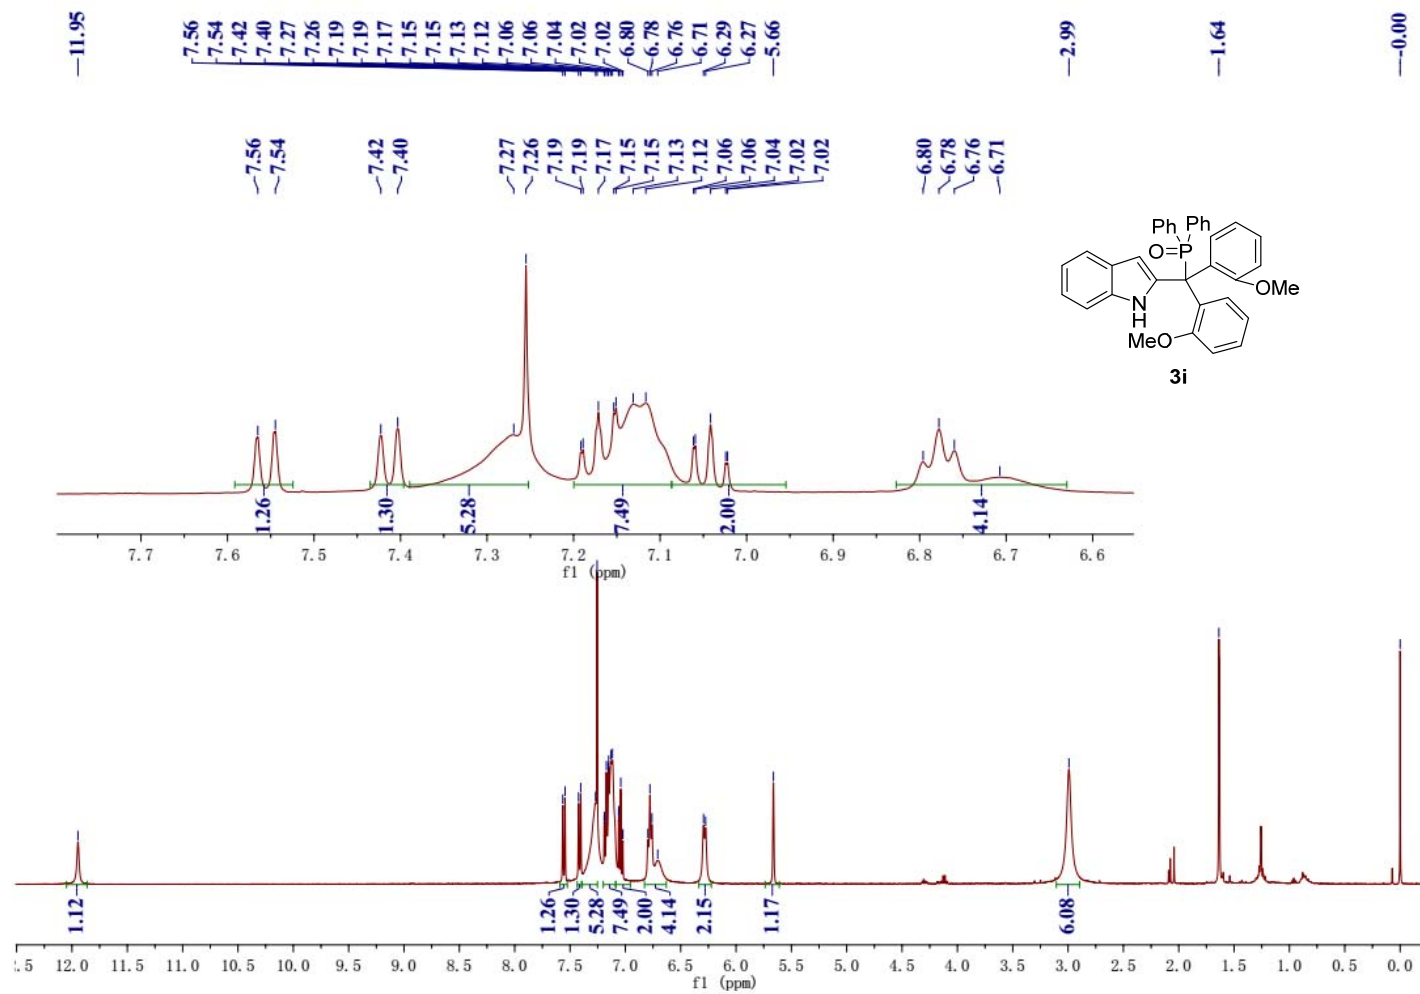

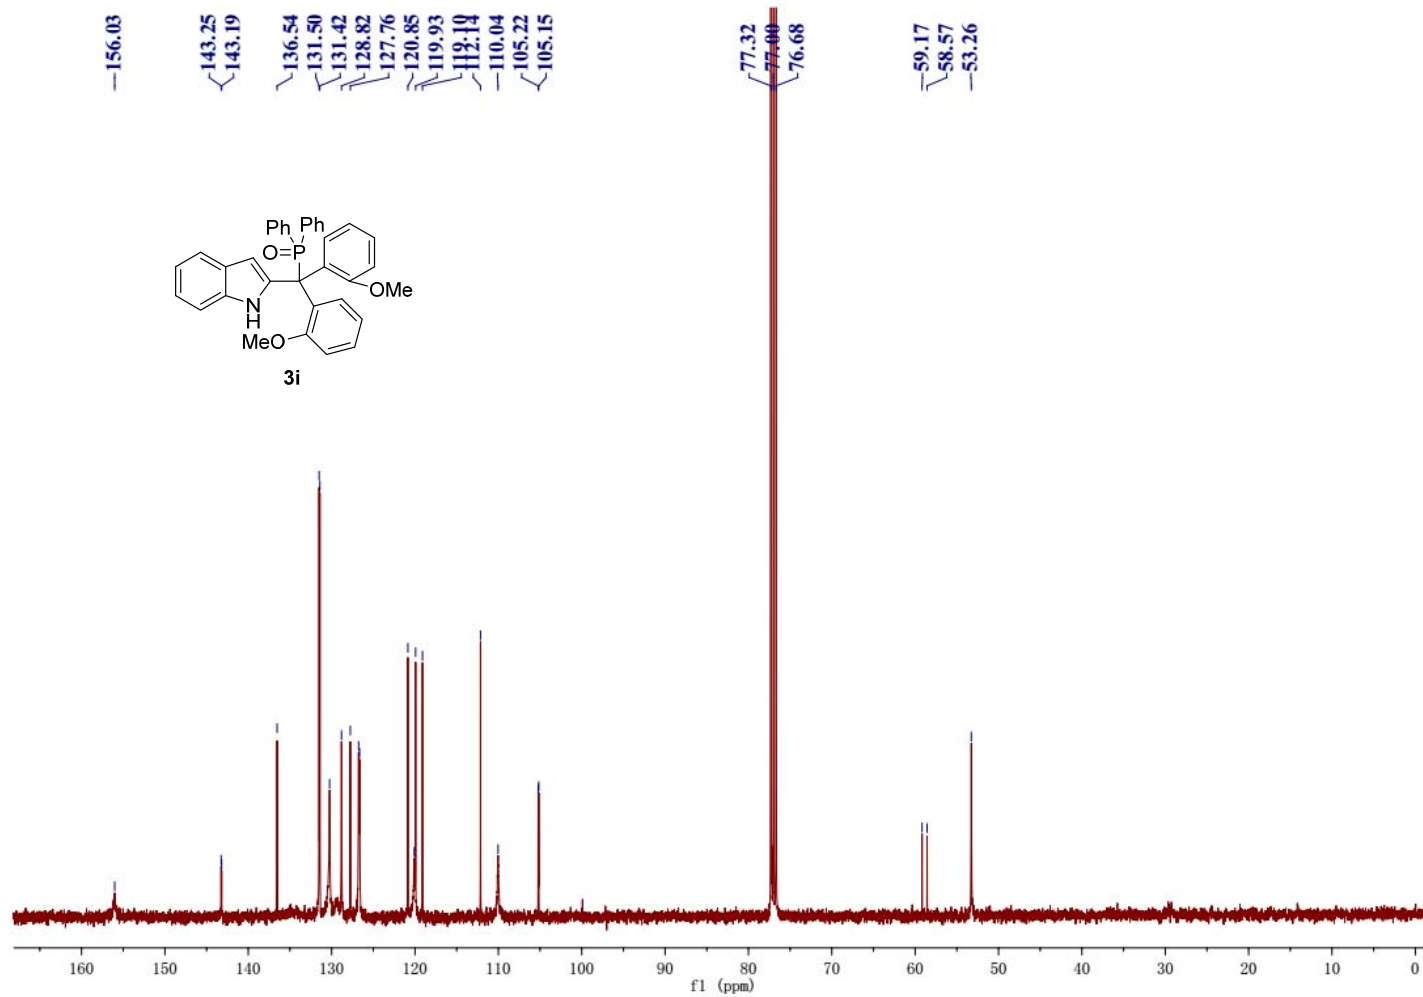

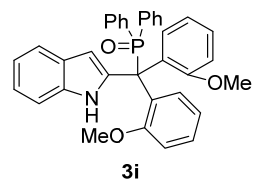

-51.64

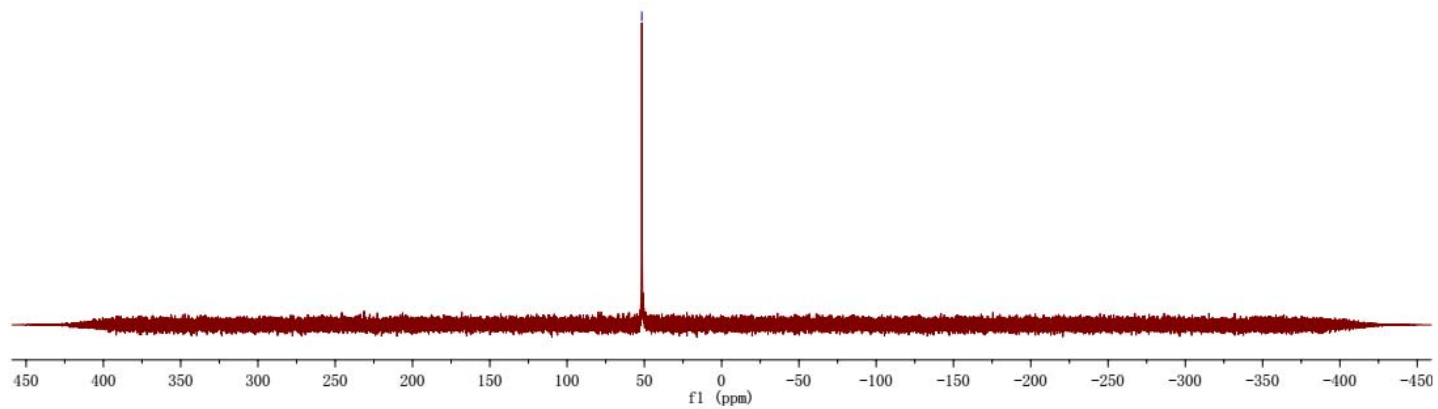

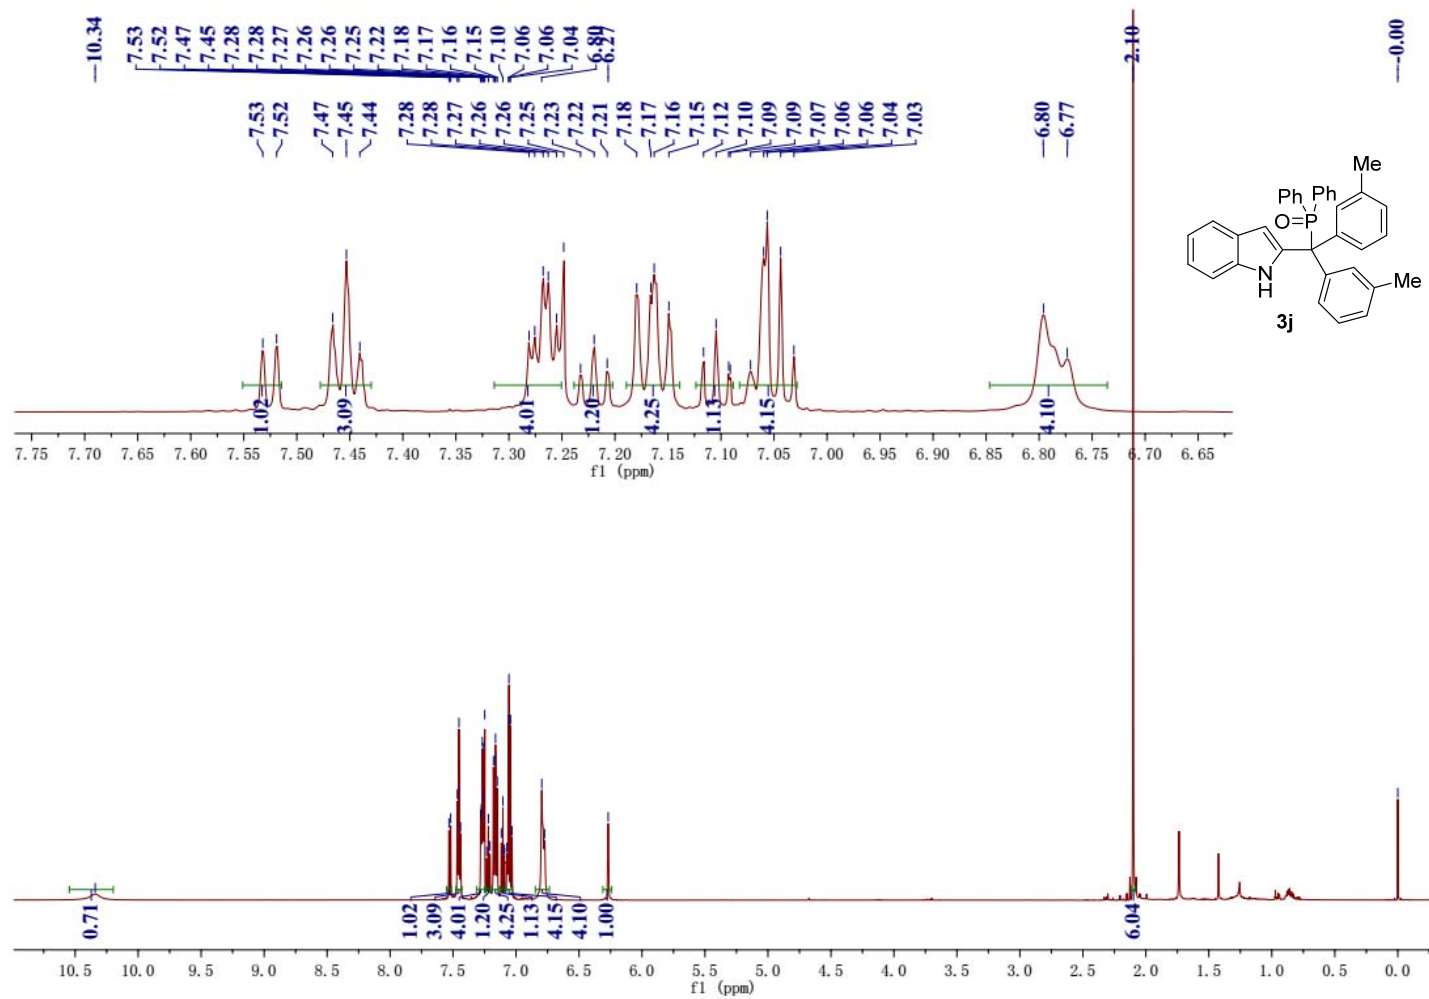

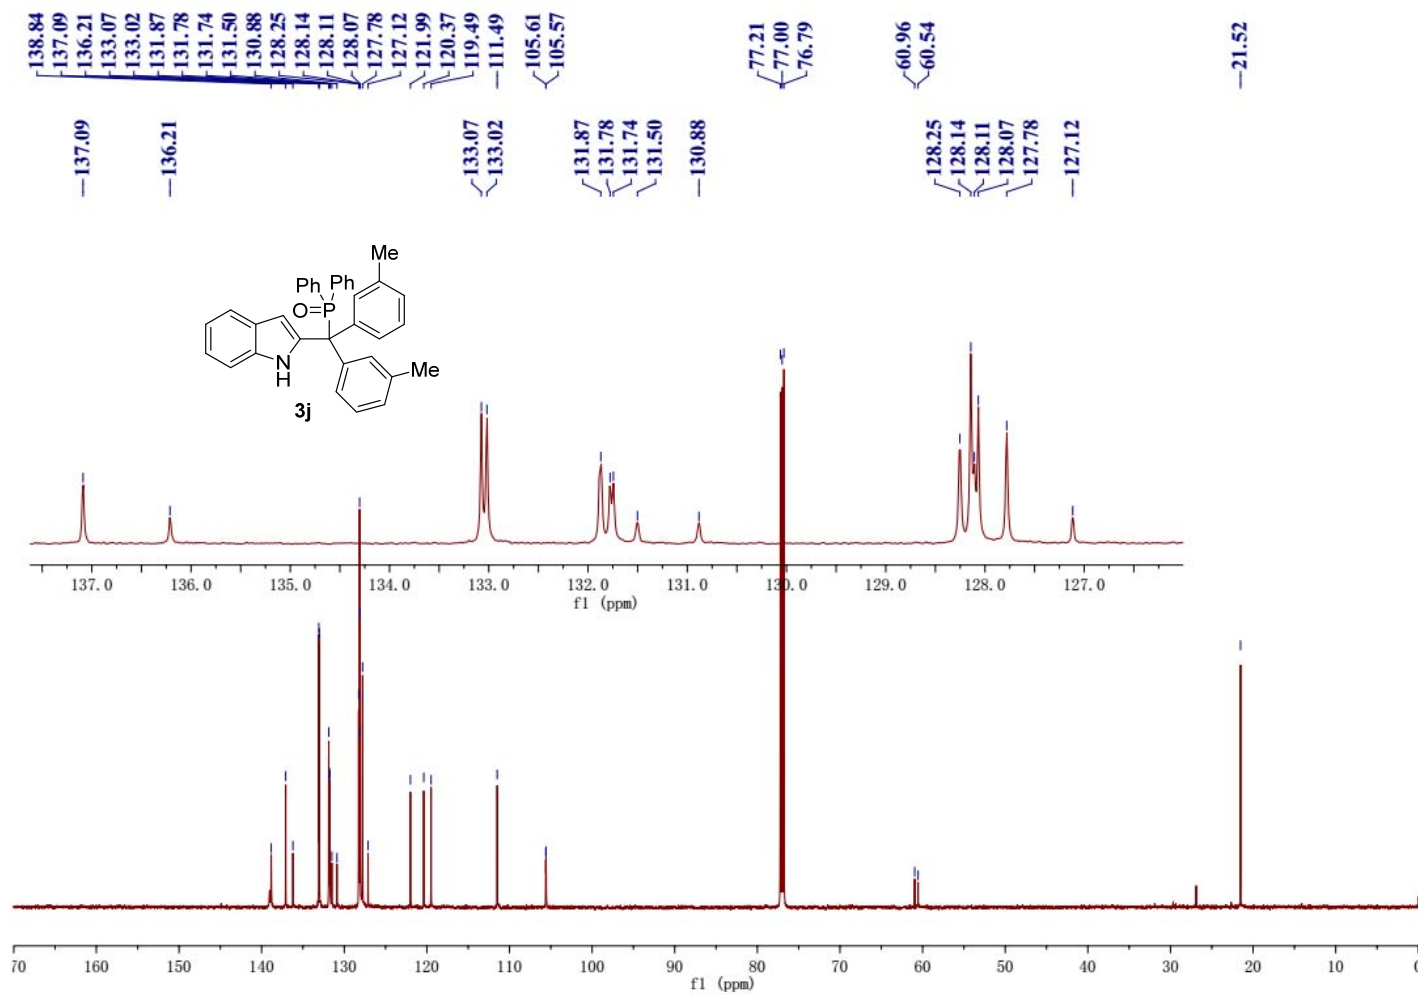

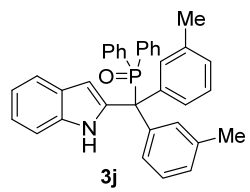

37.50

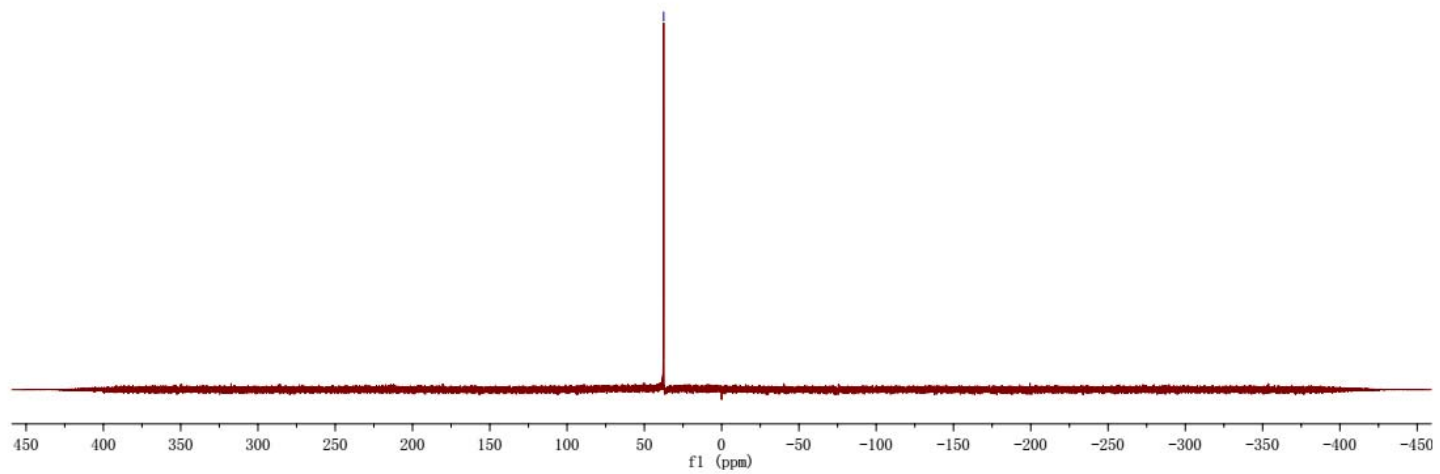

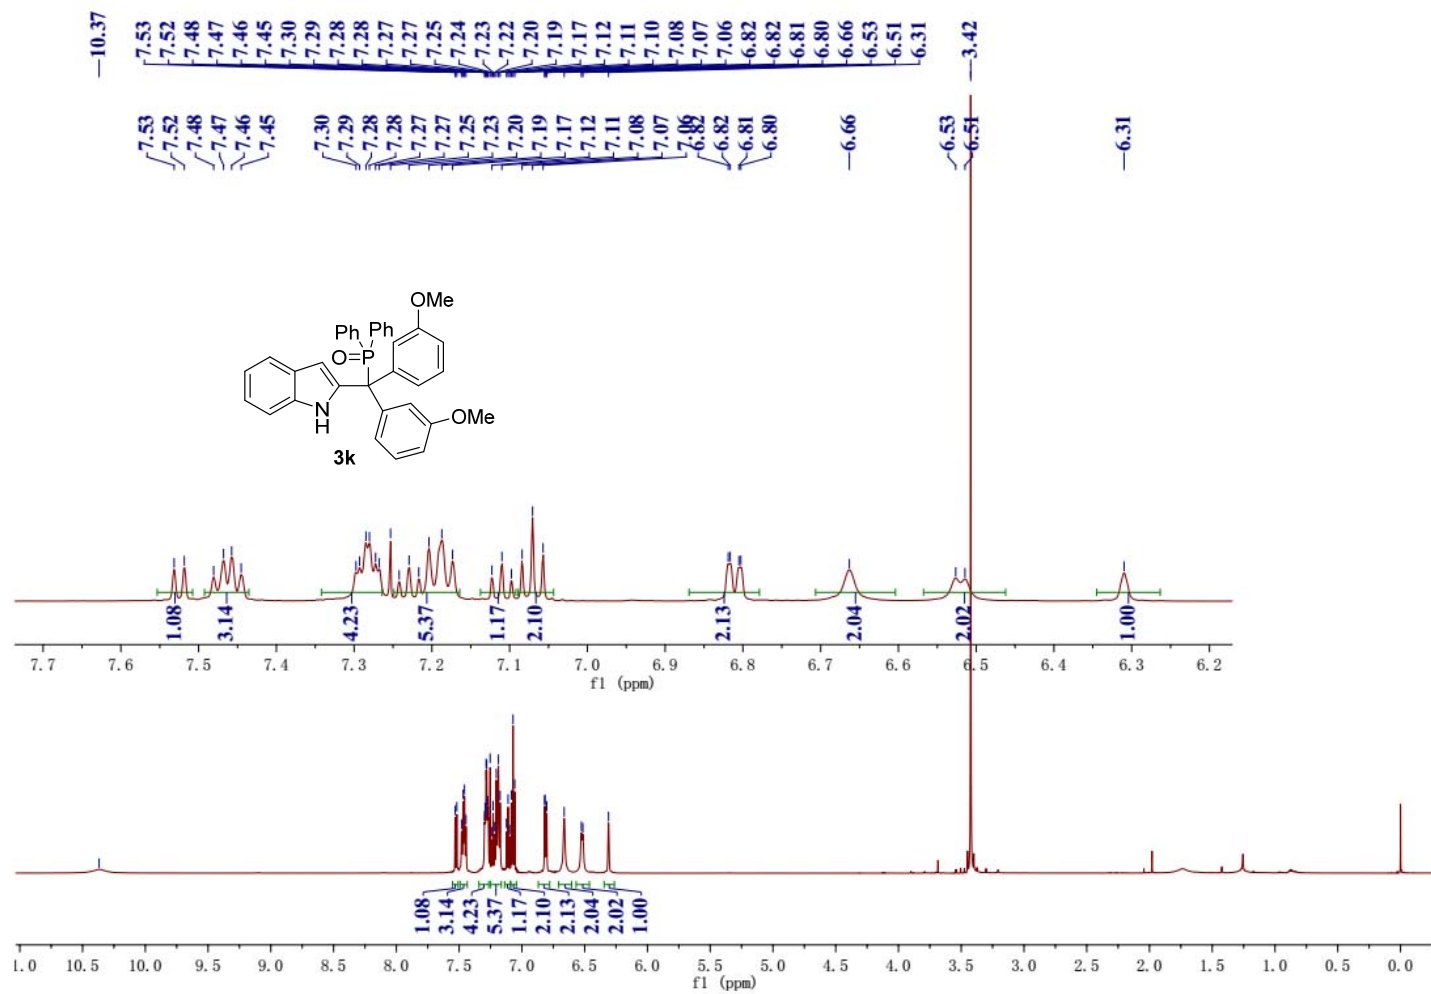



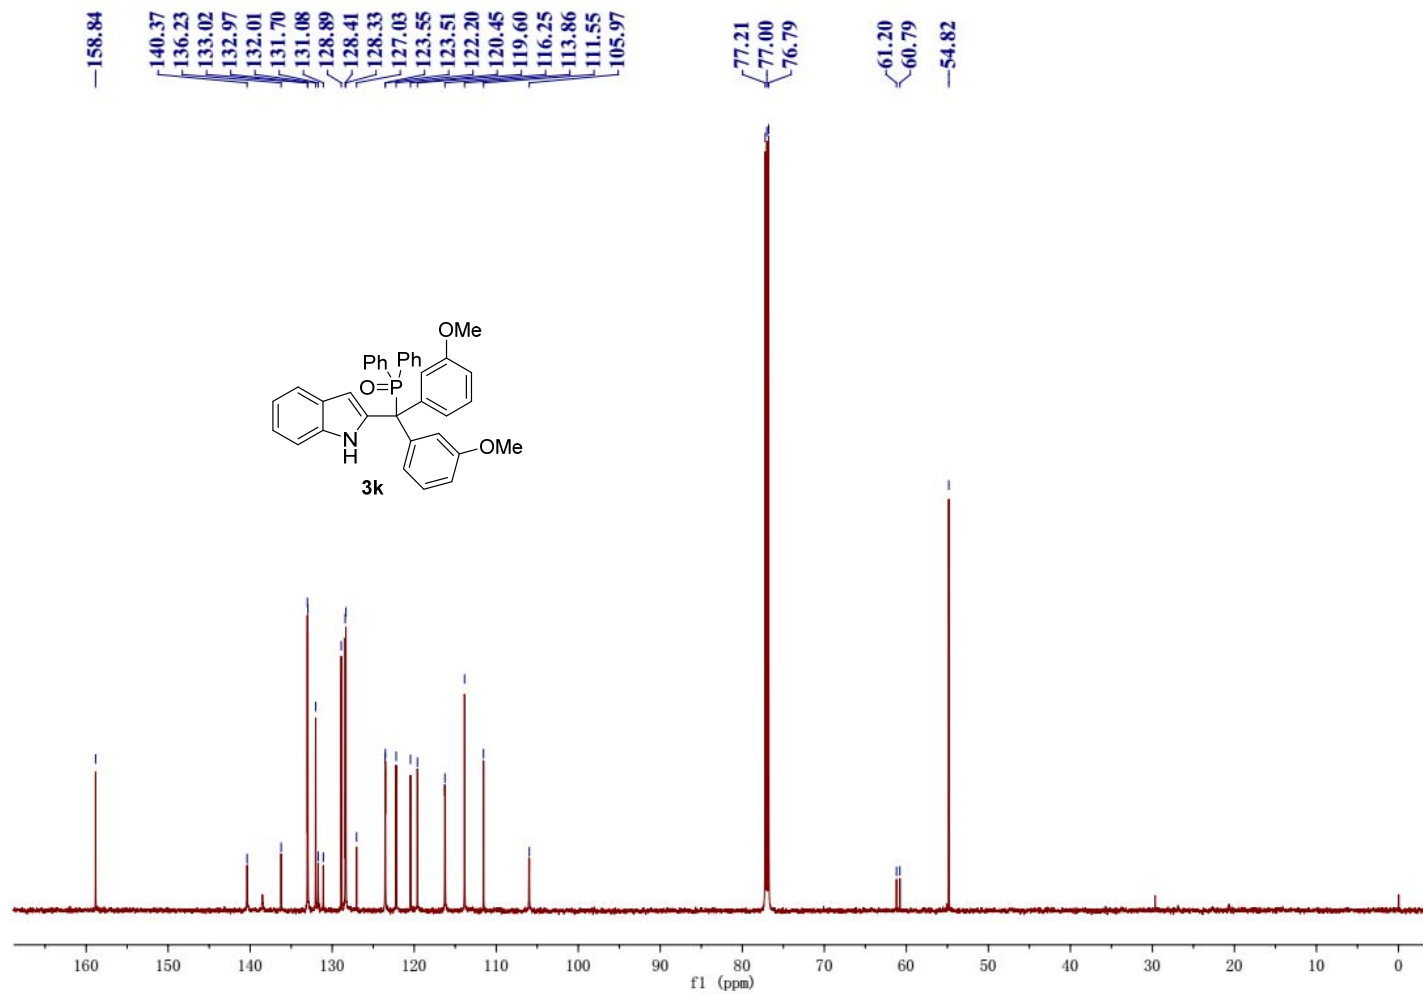

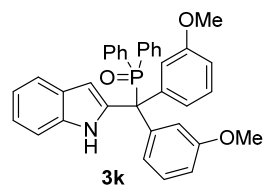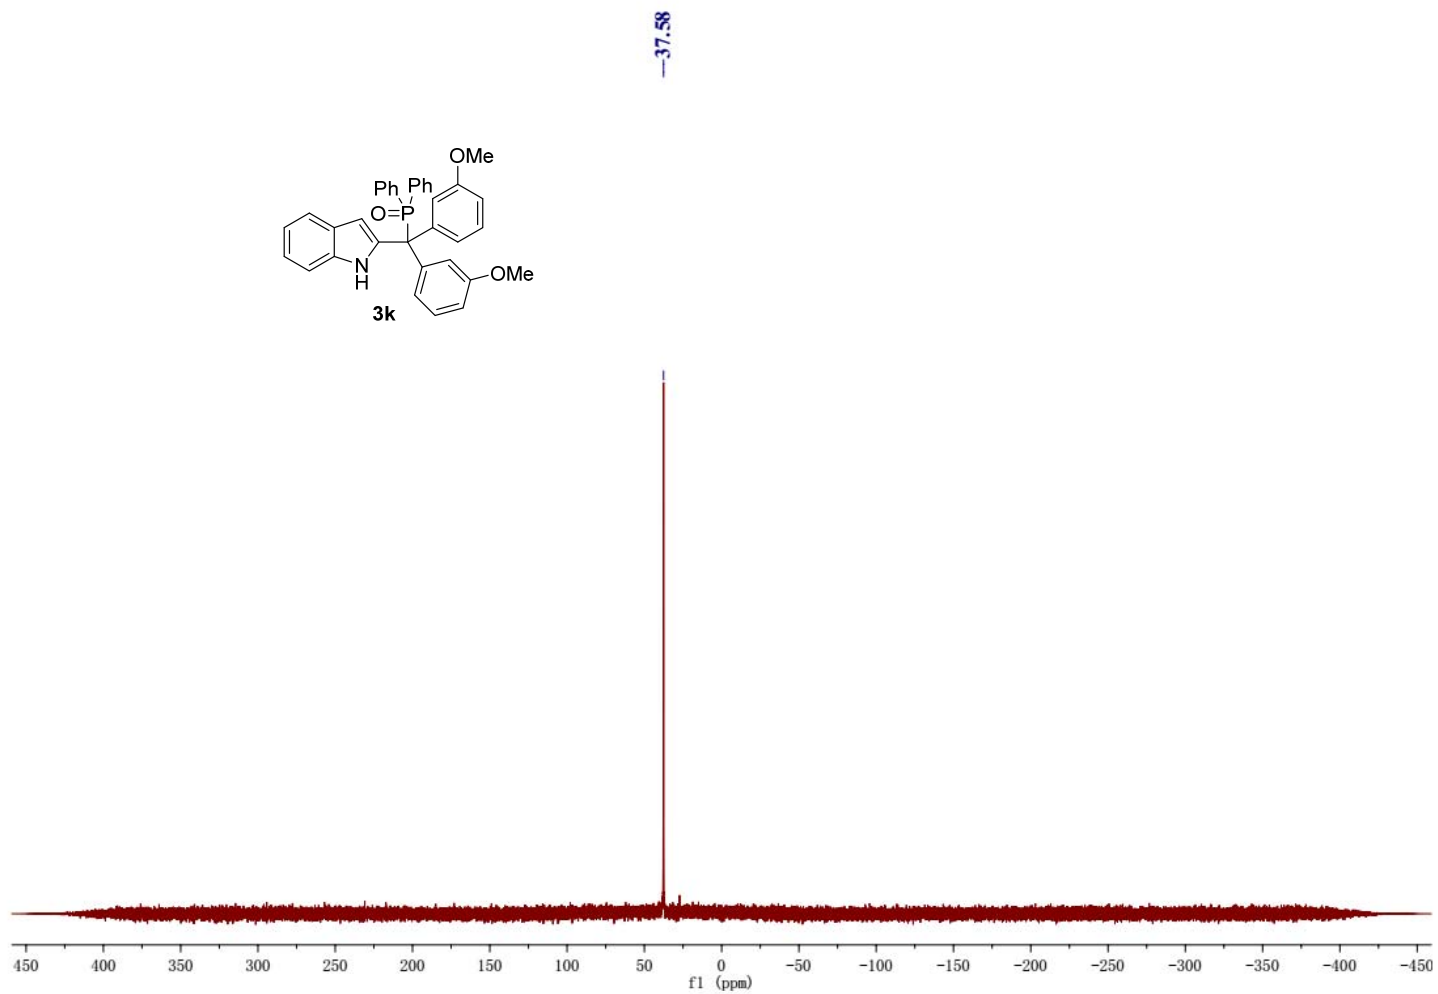

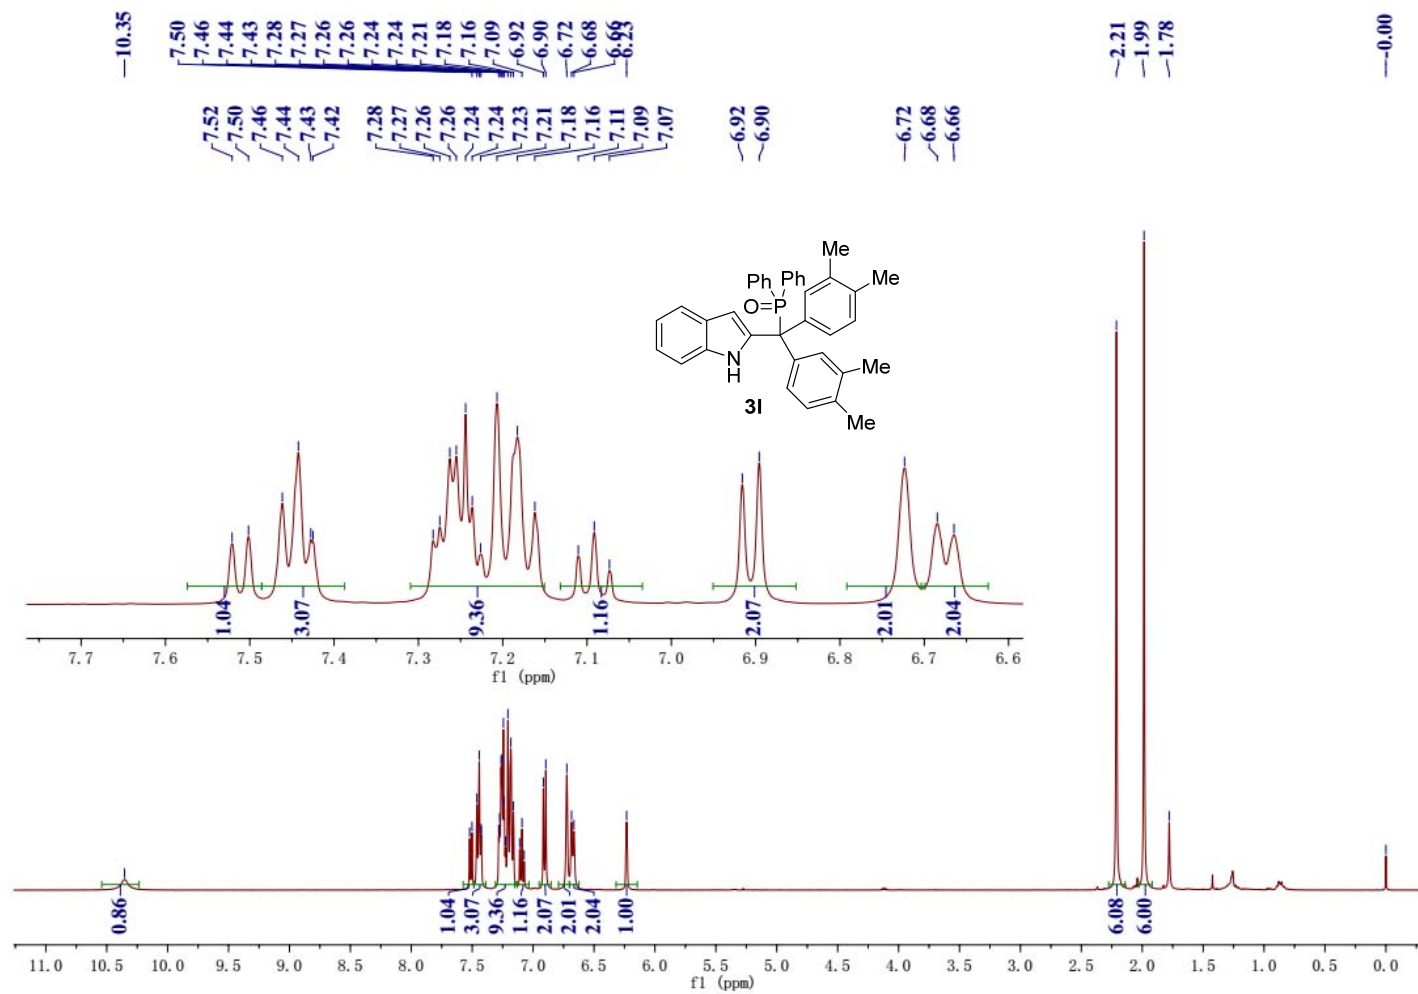

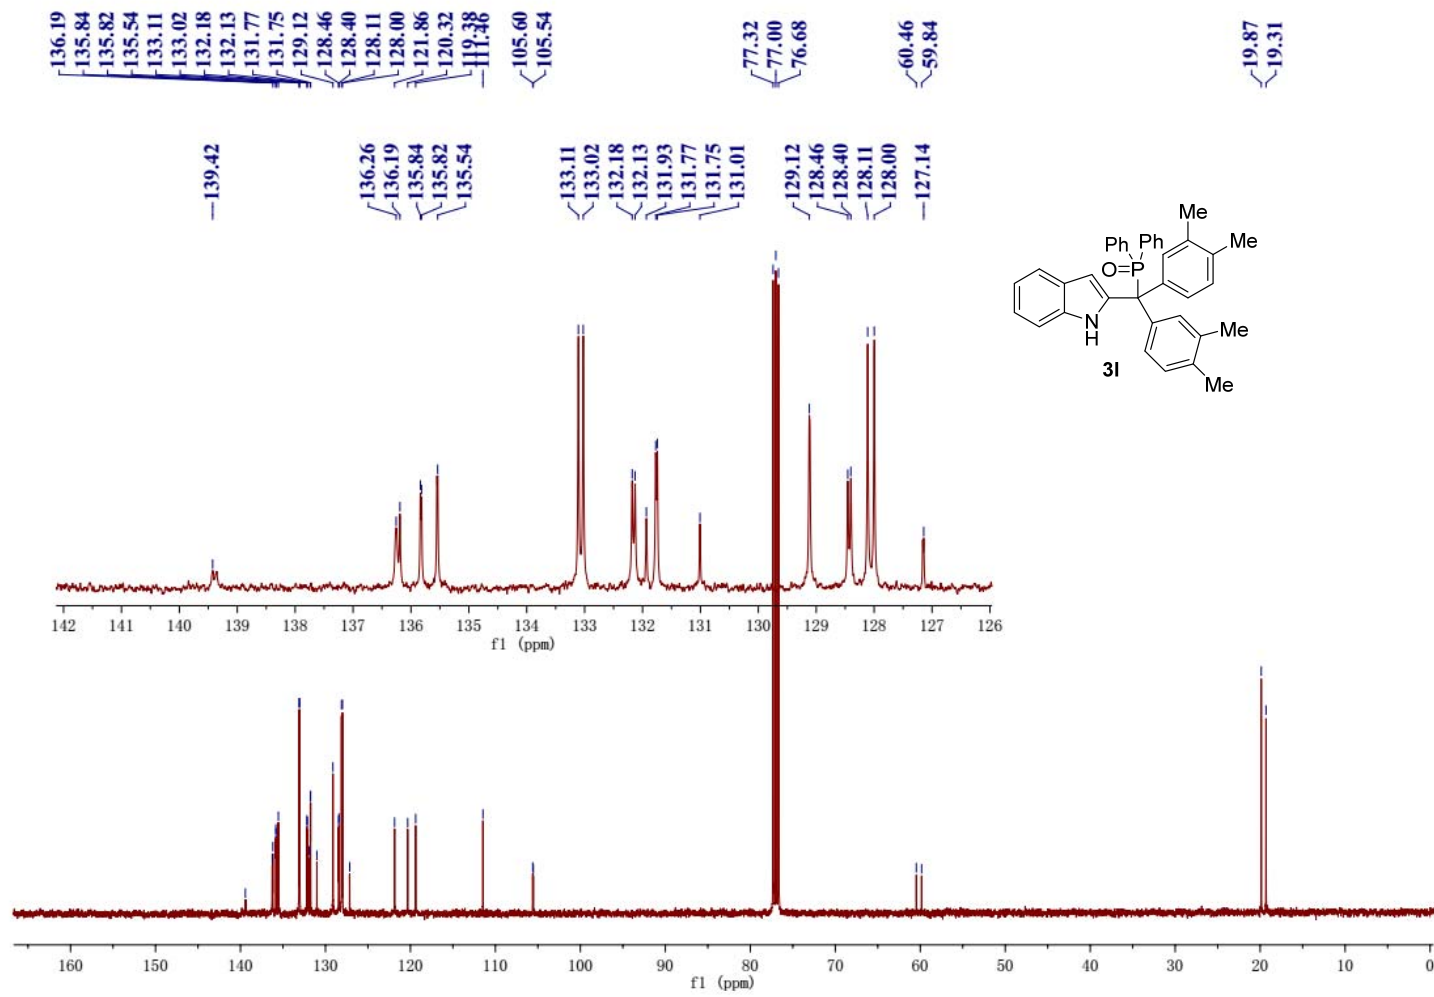

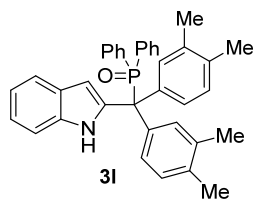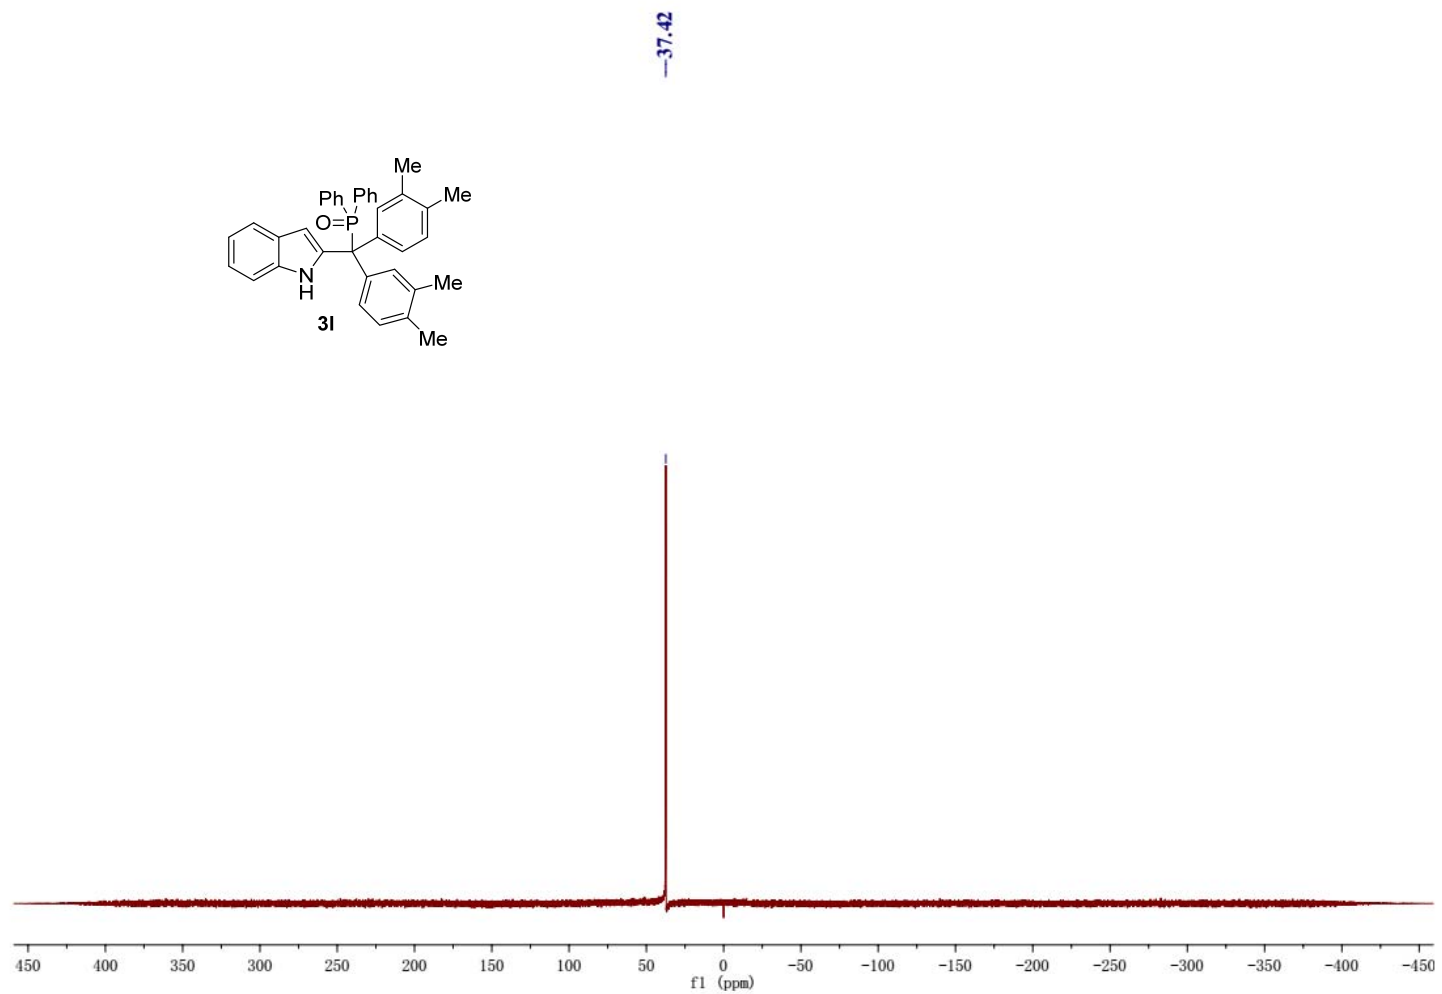

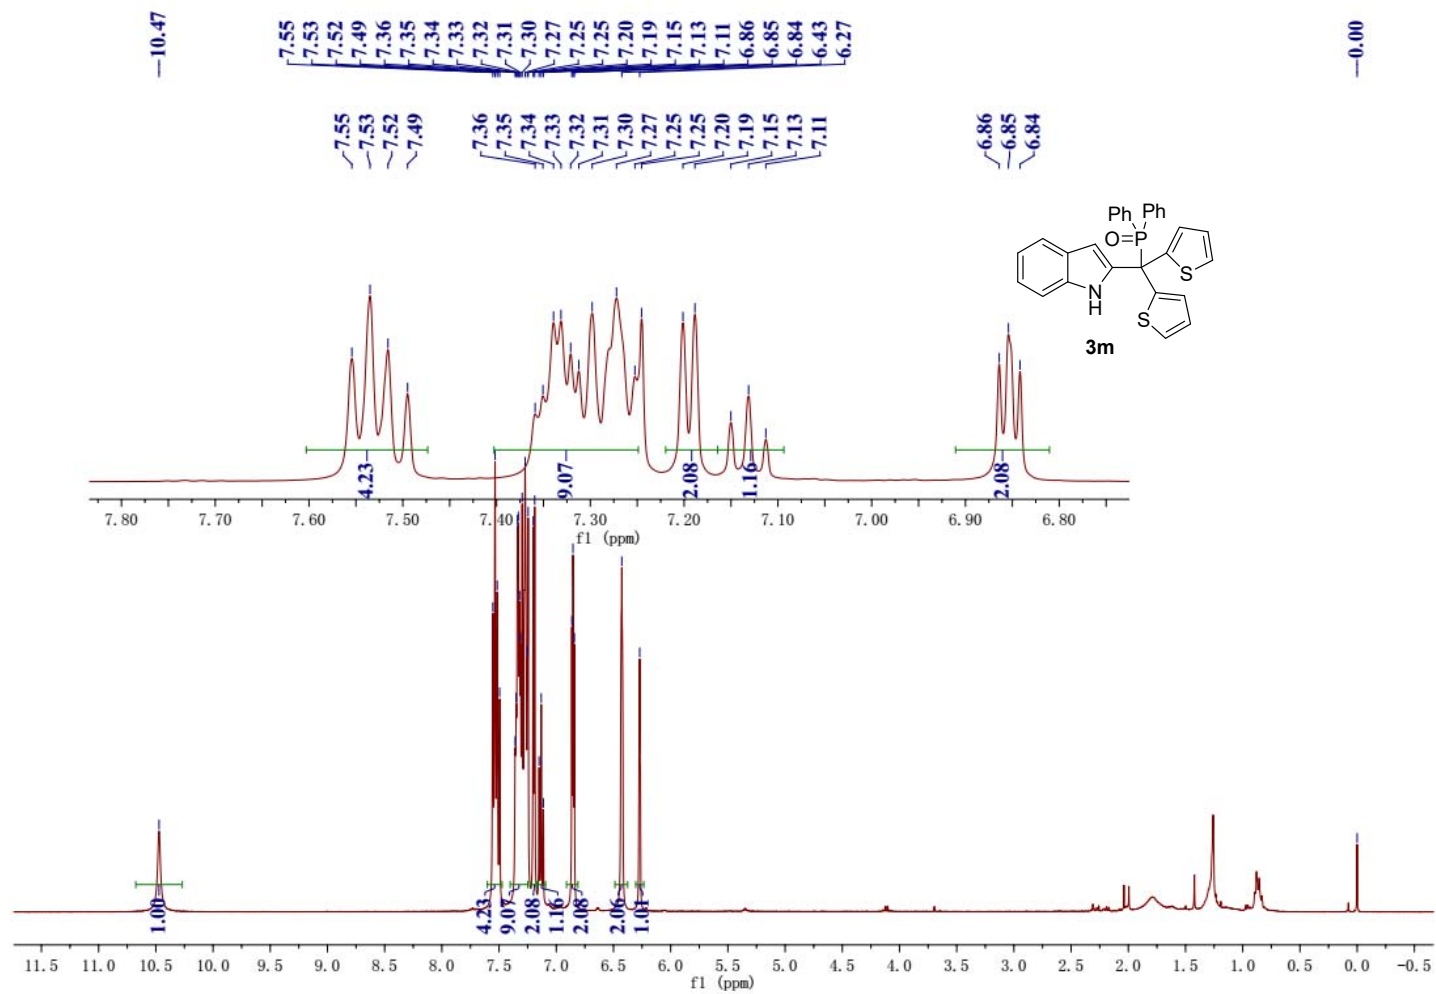

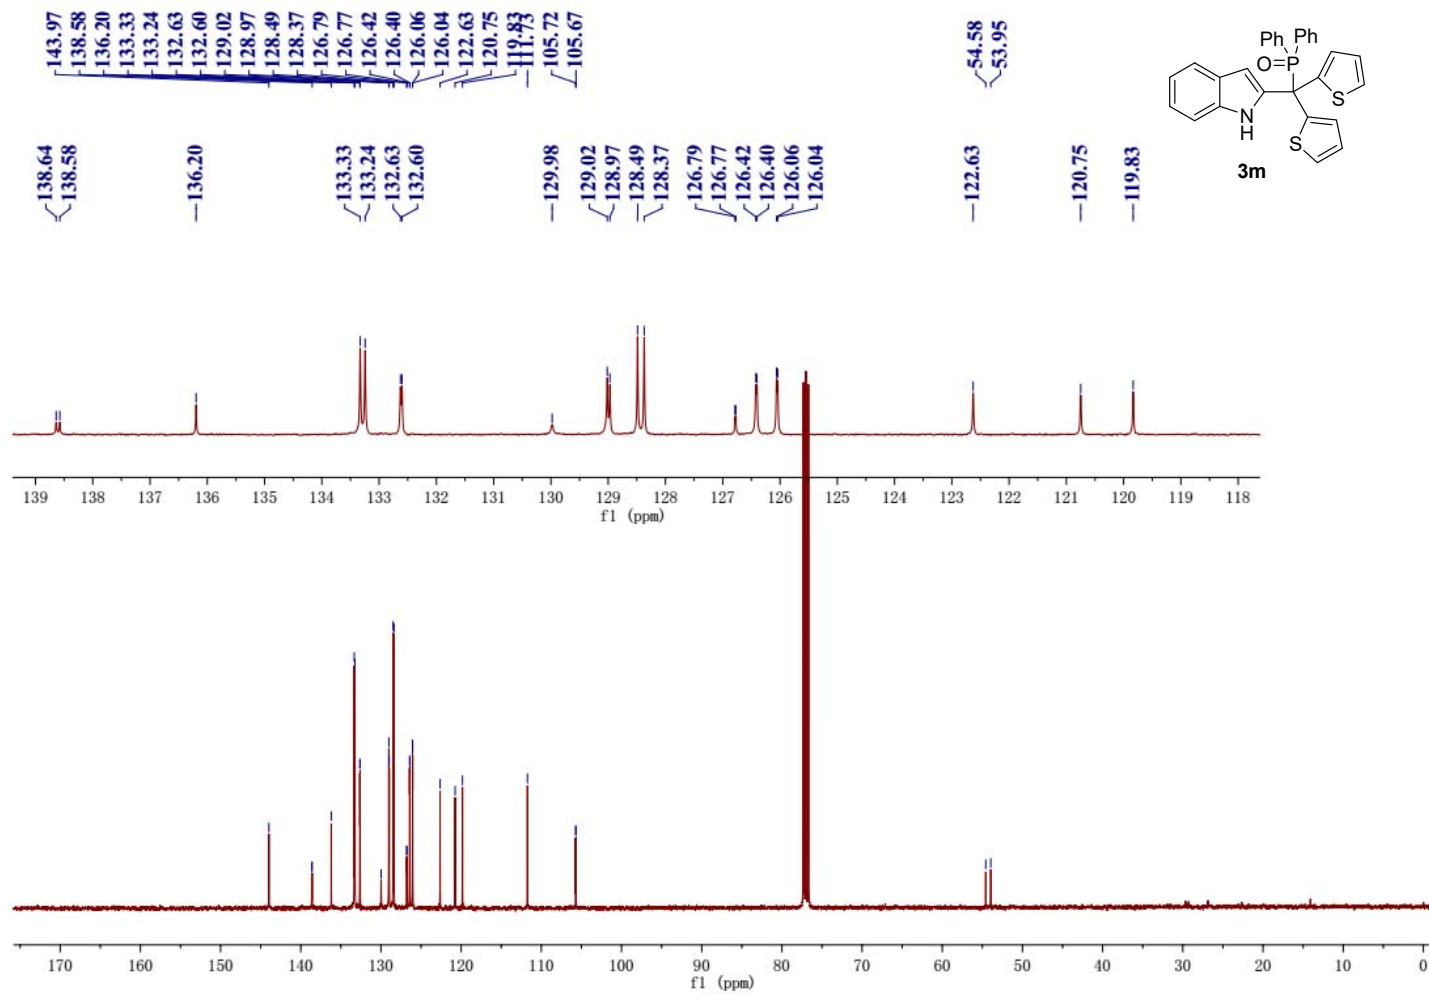

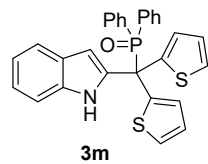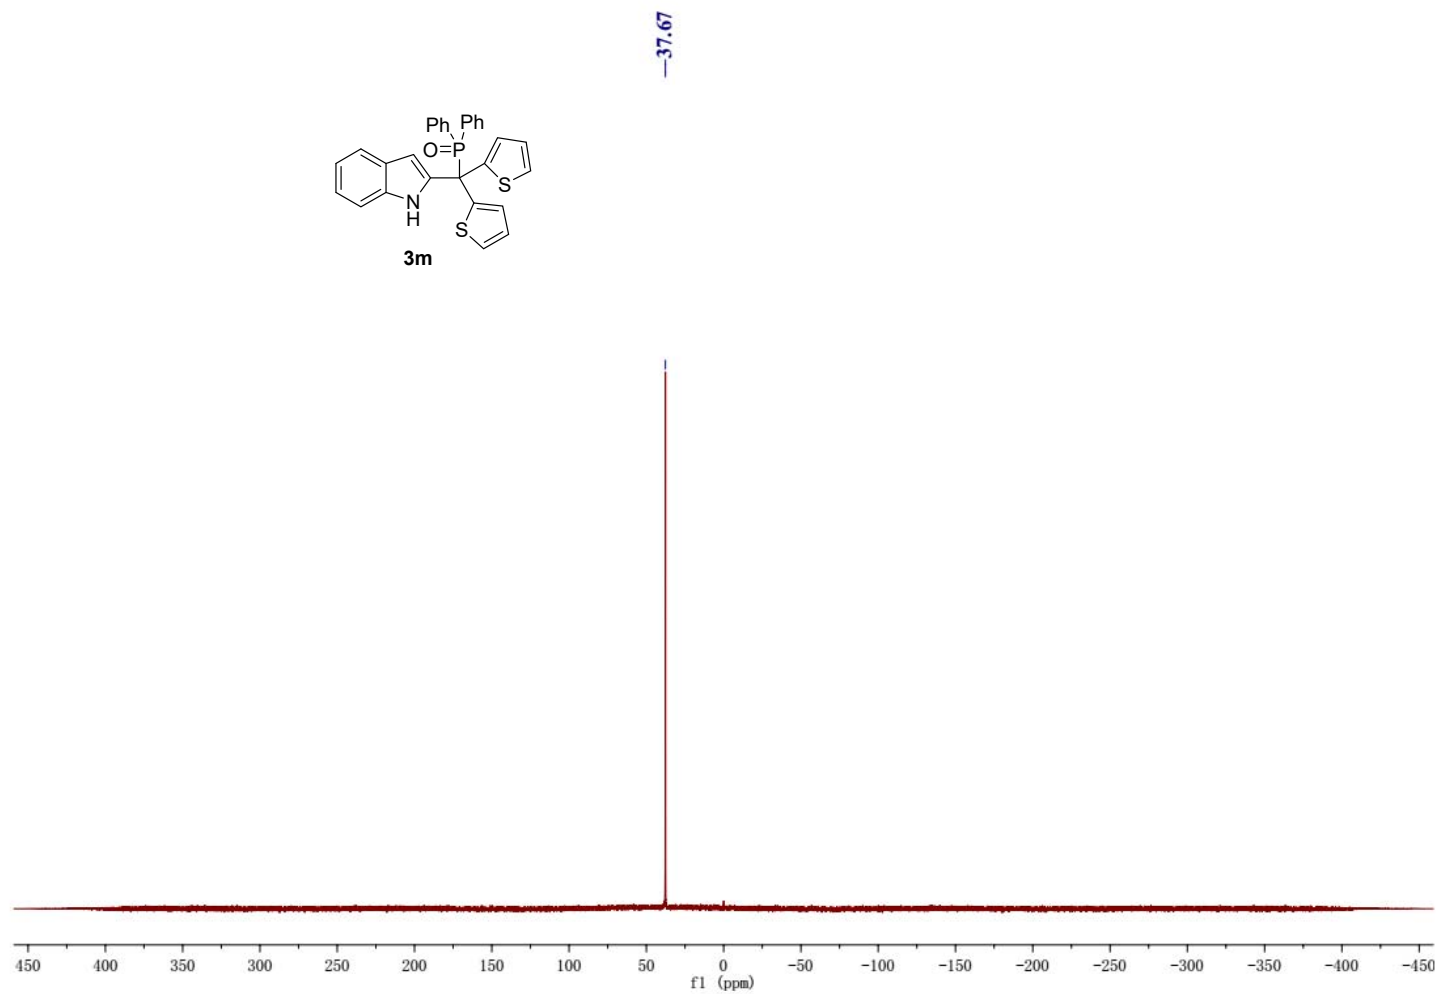



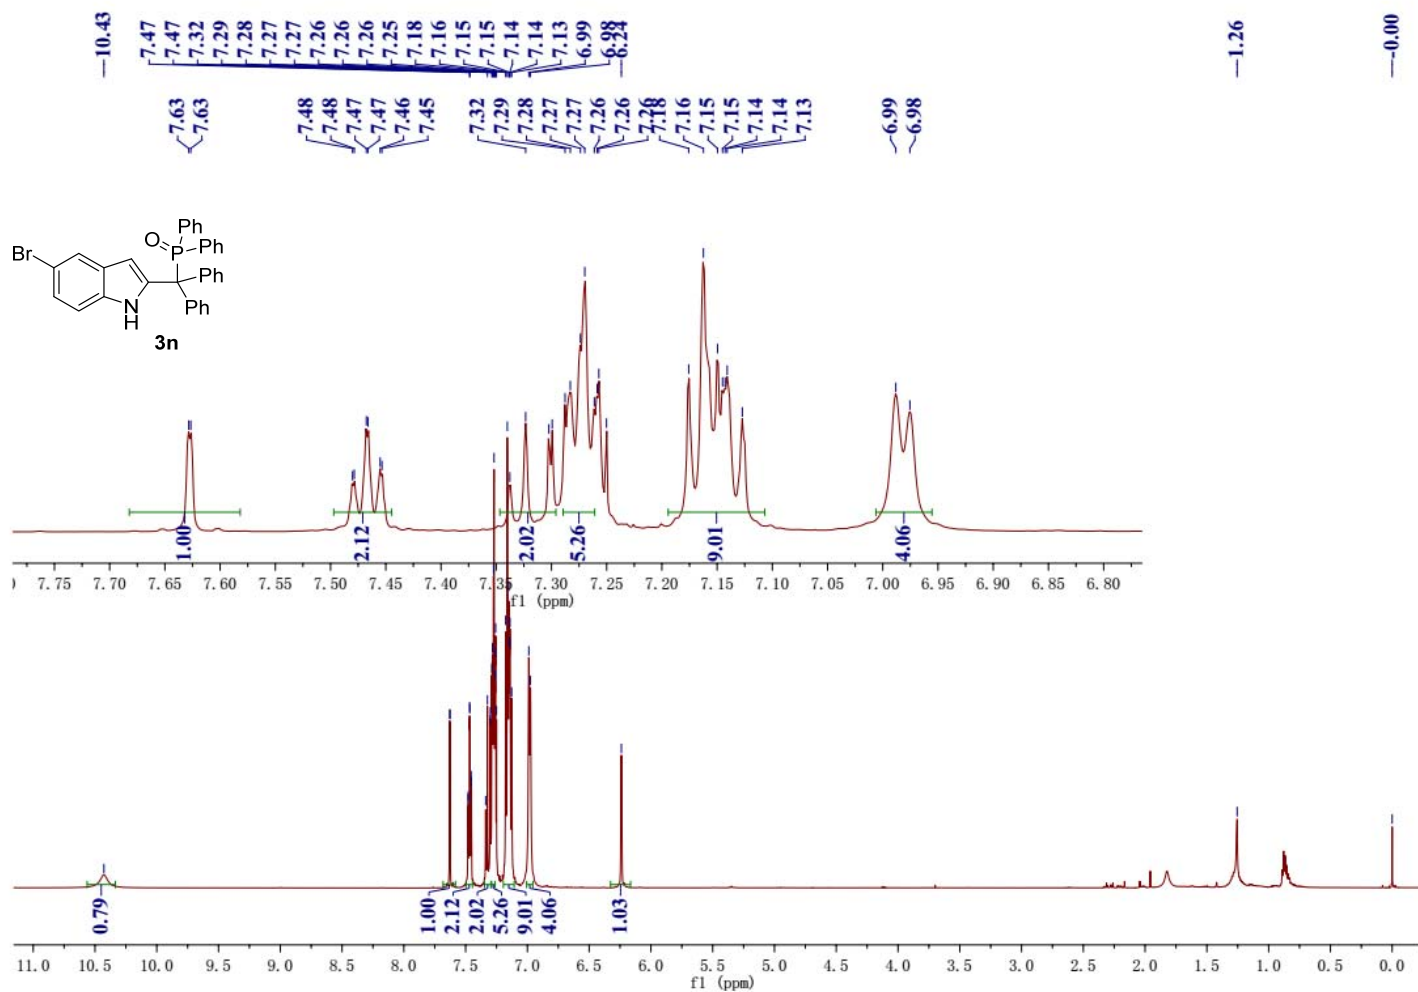

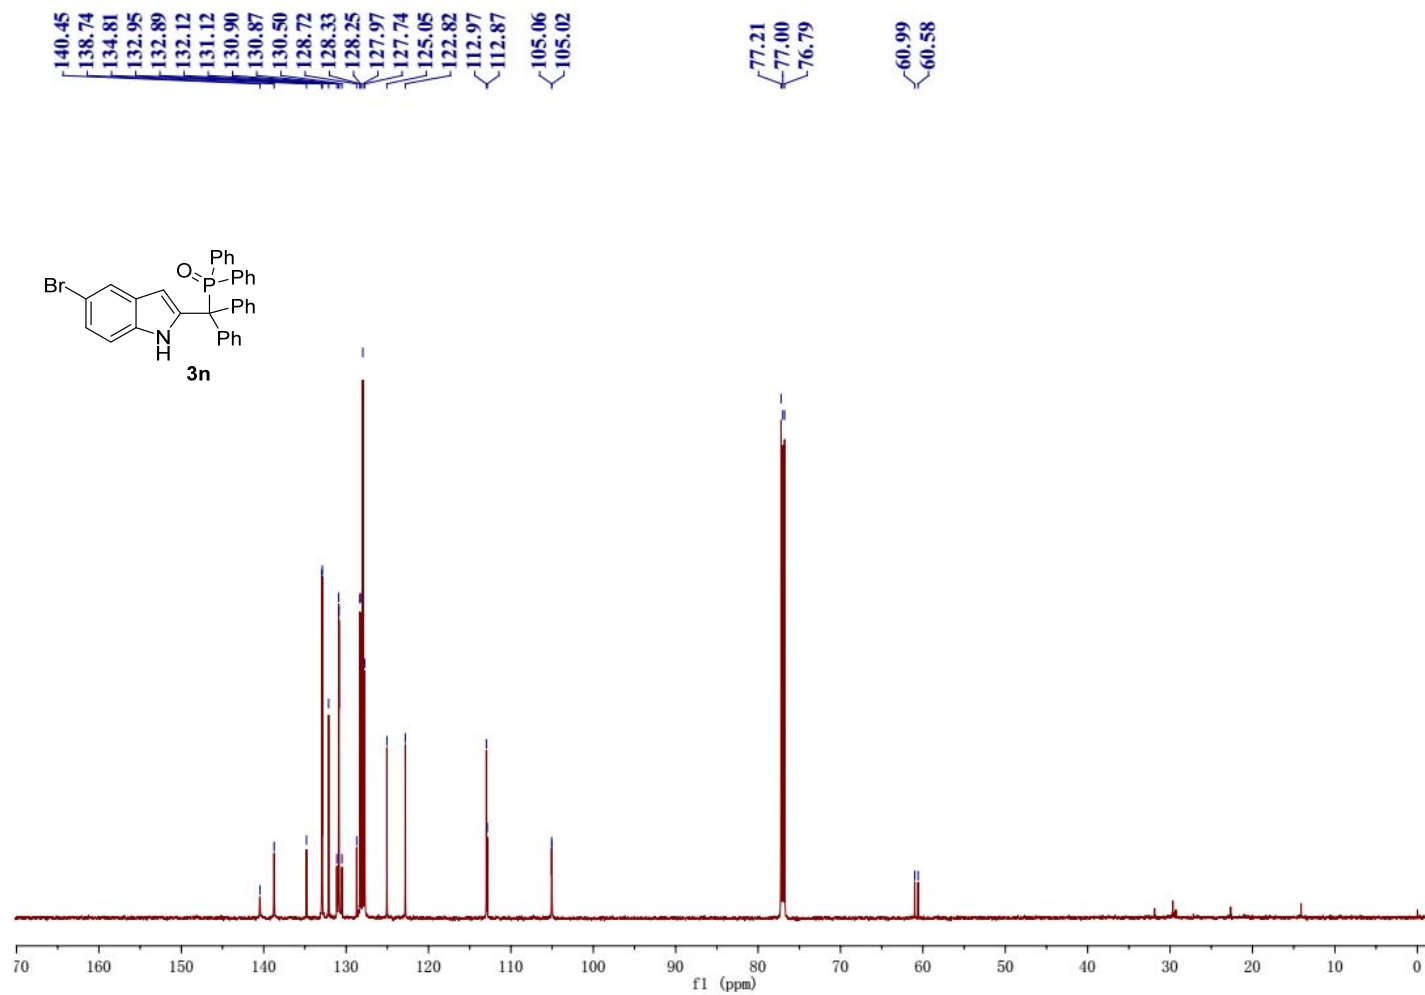

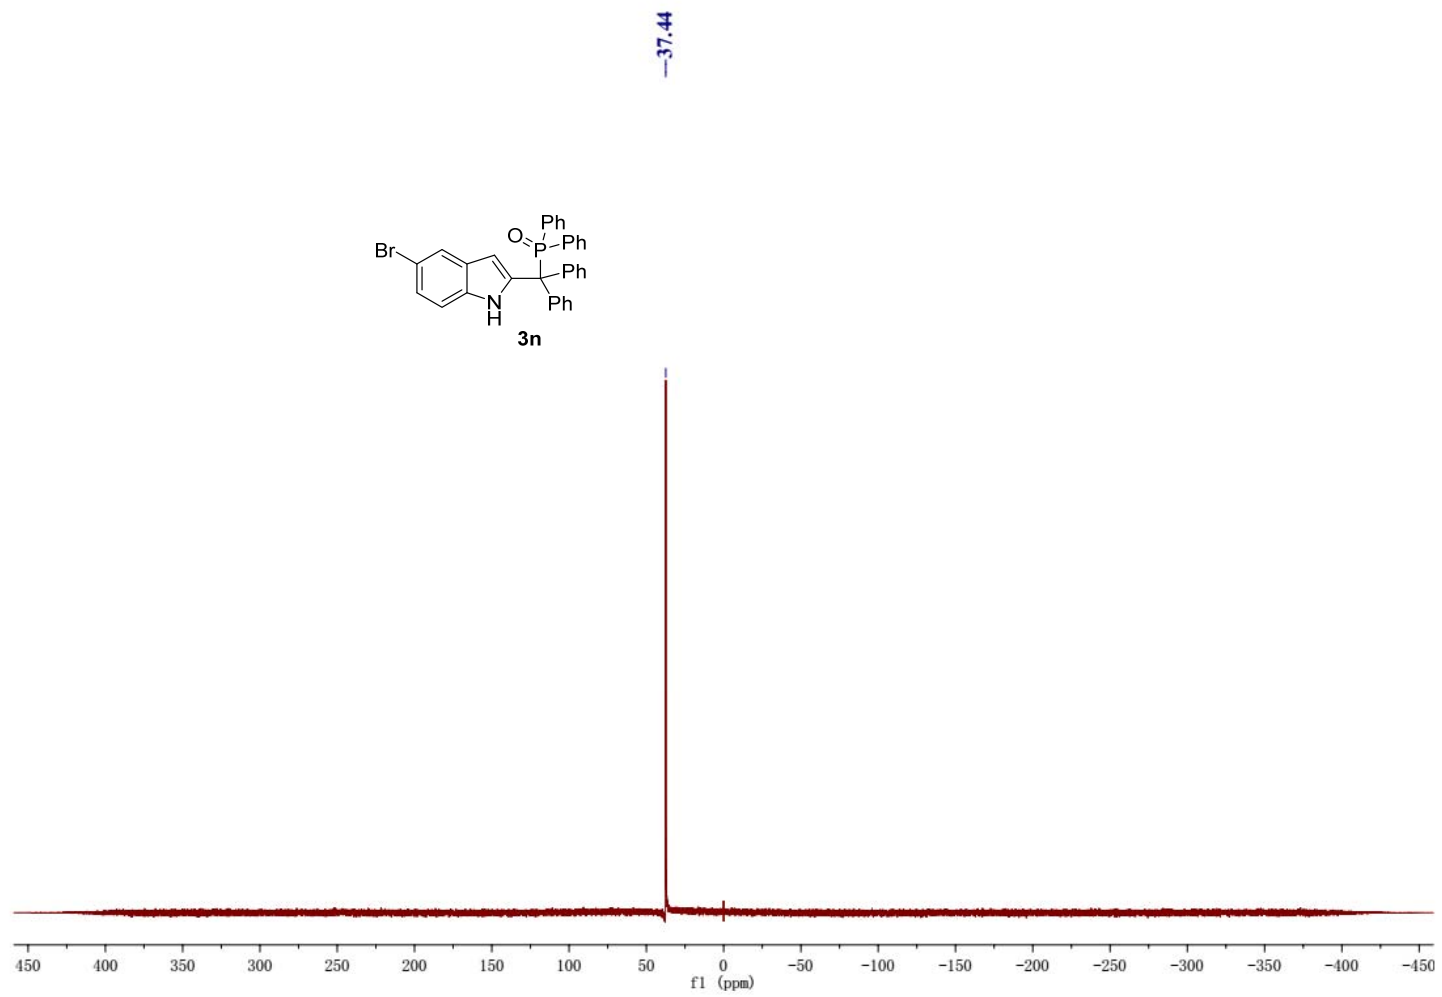

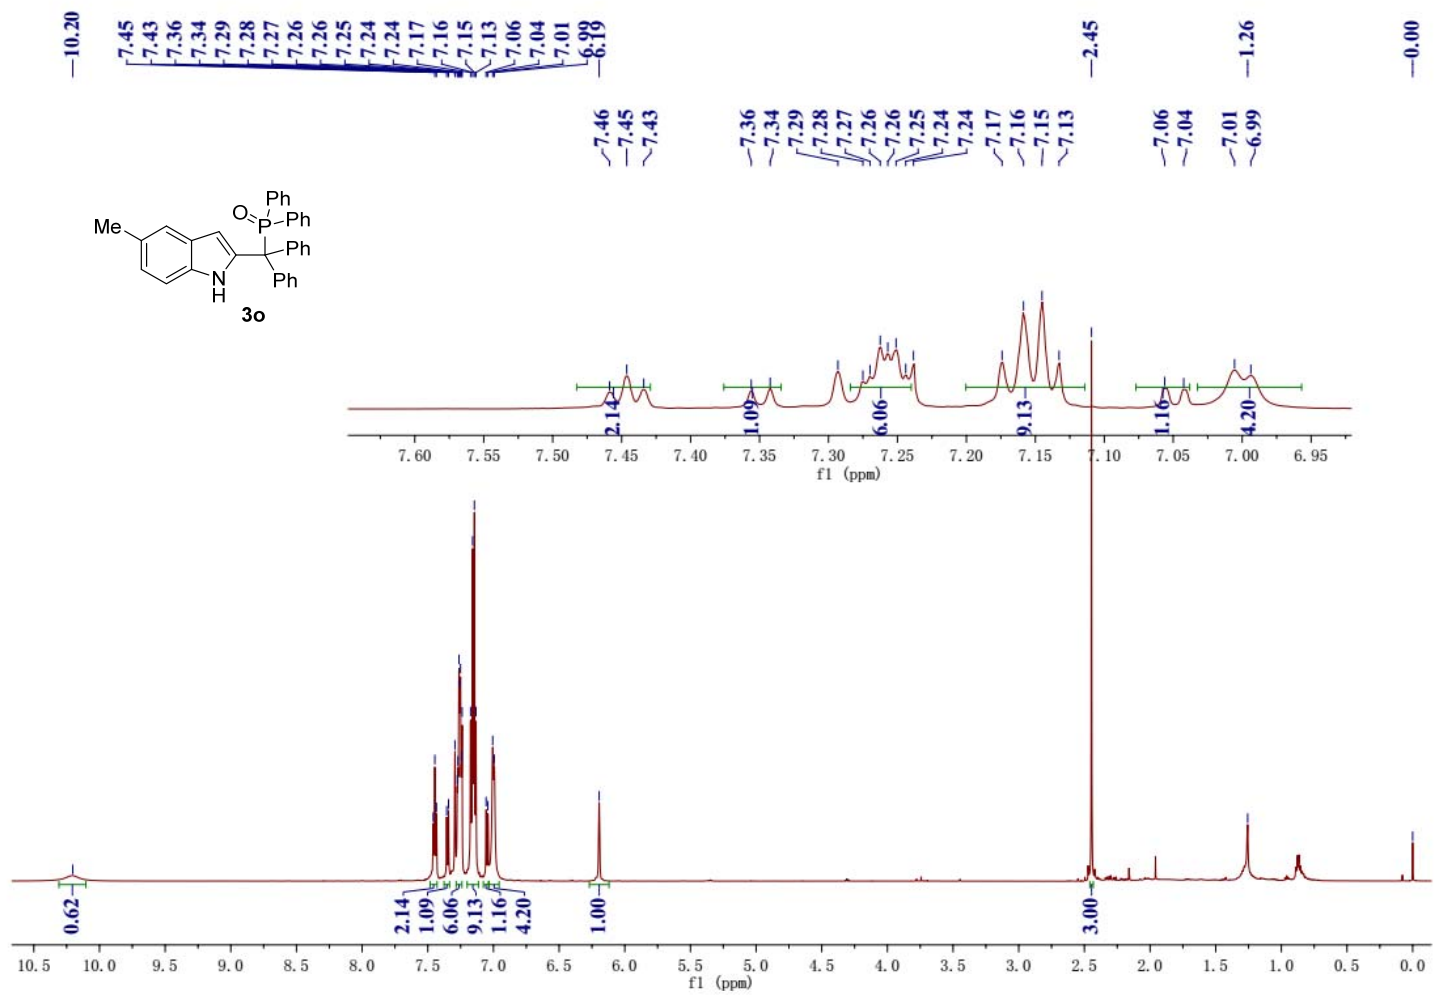

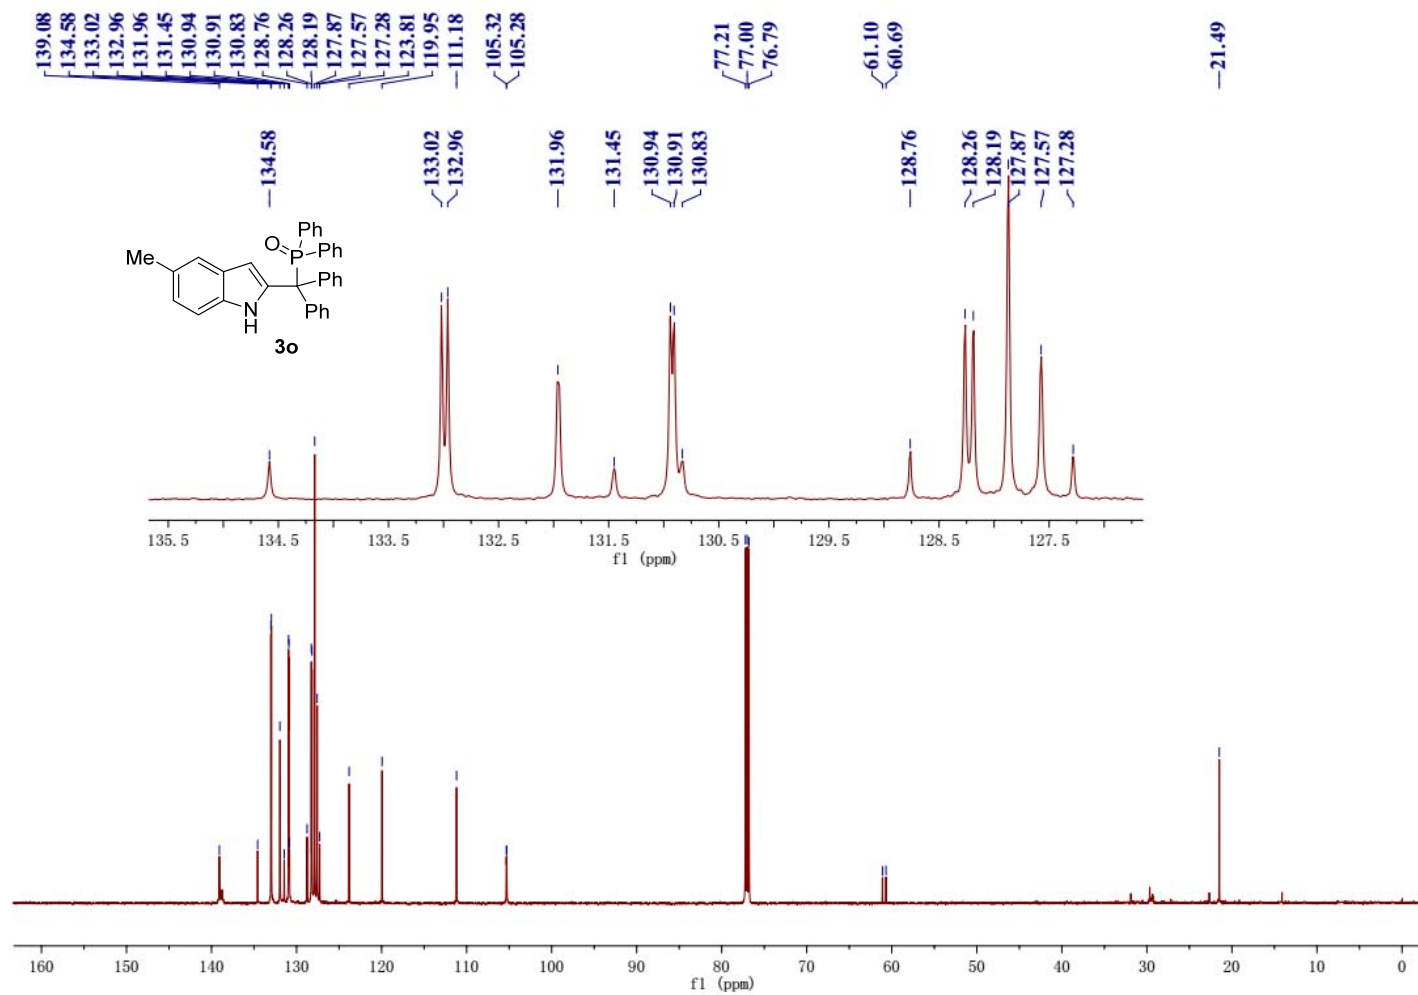

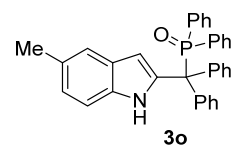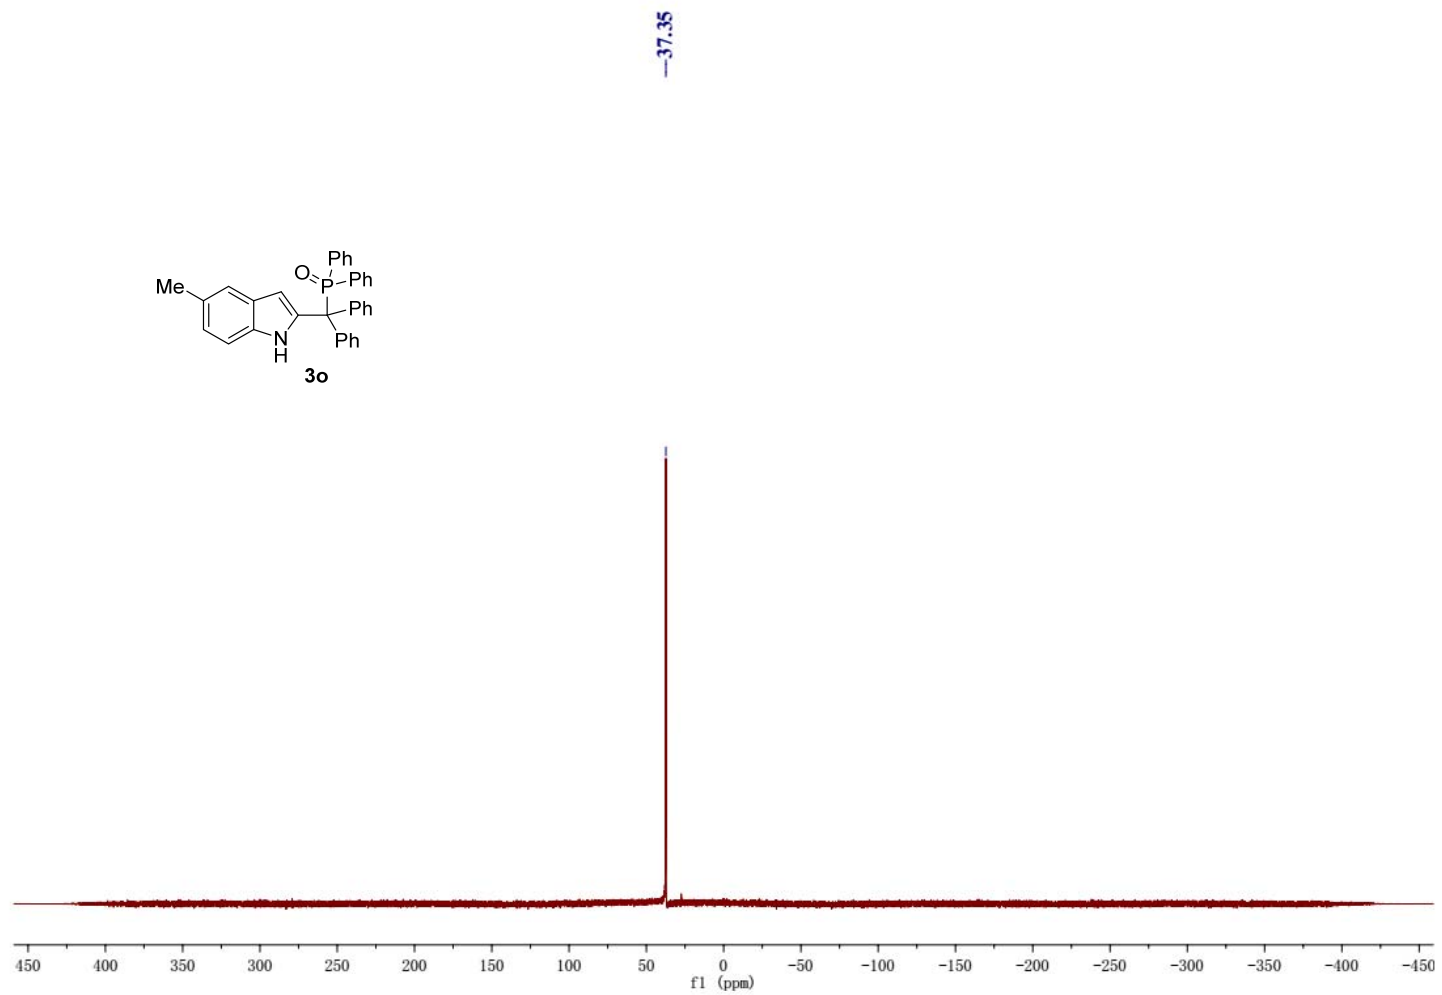

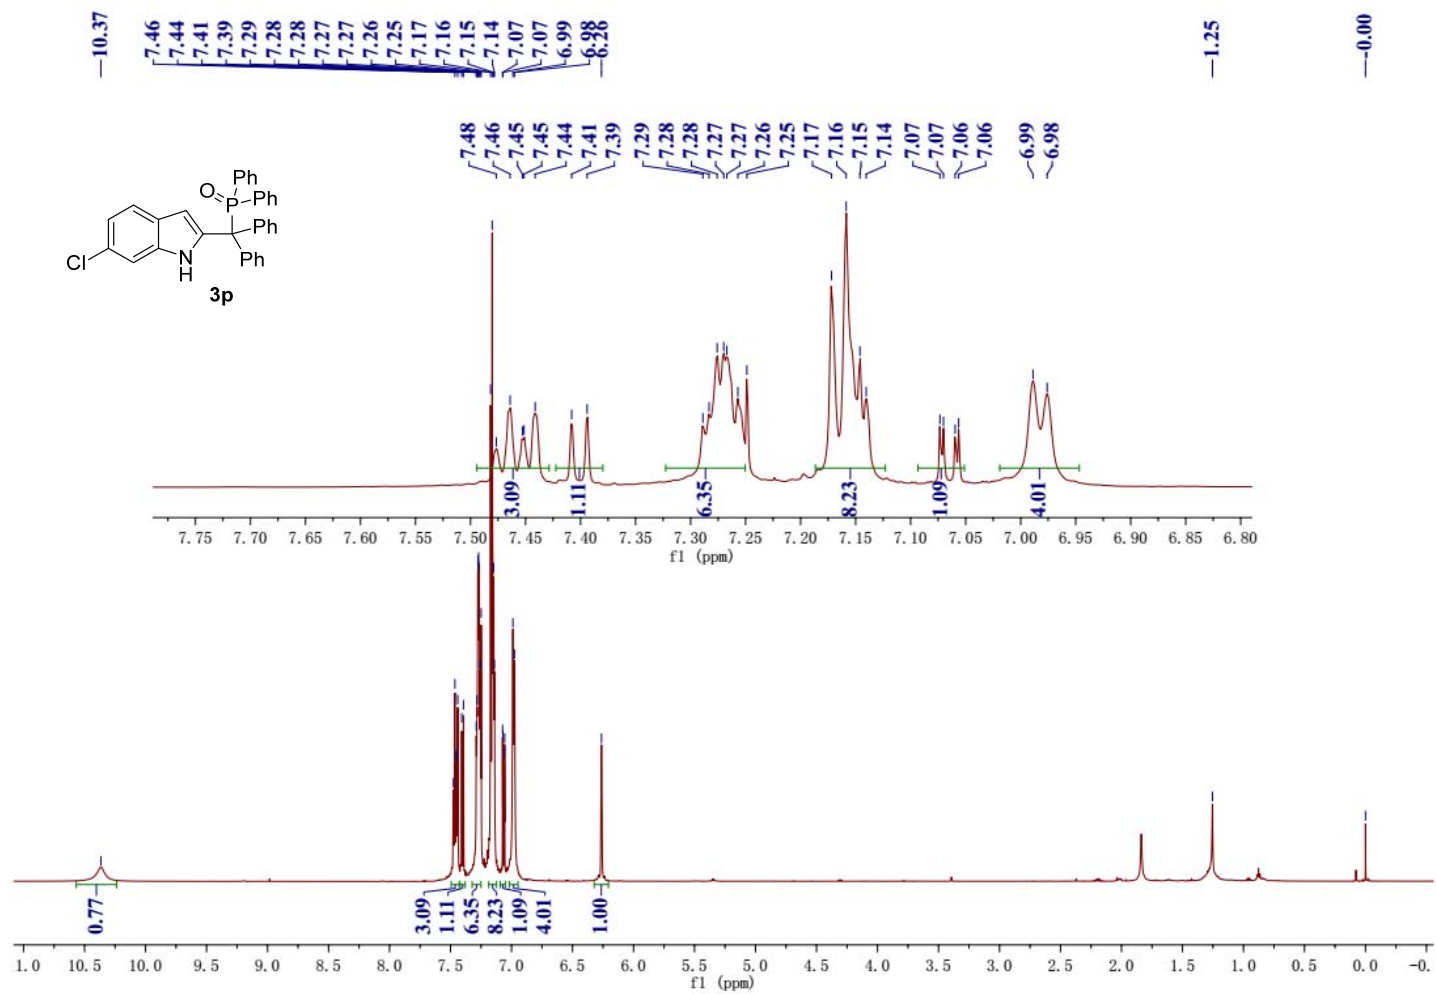

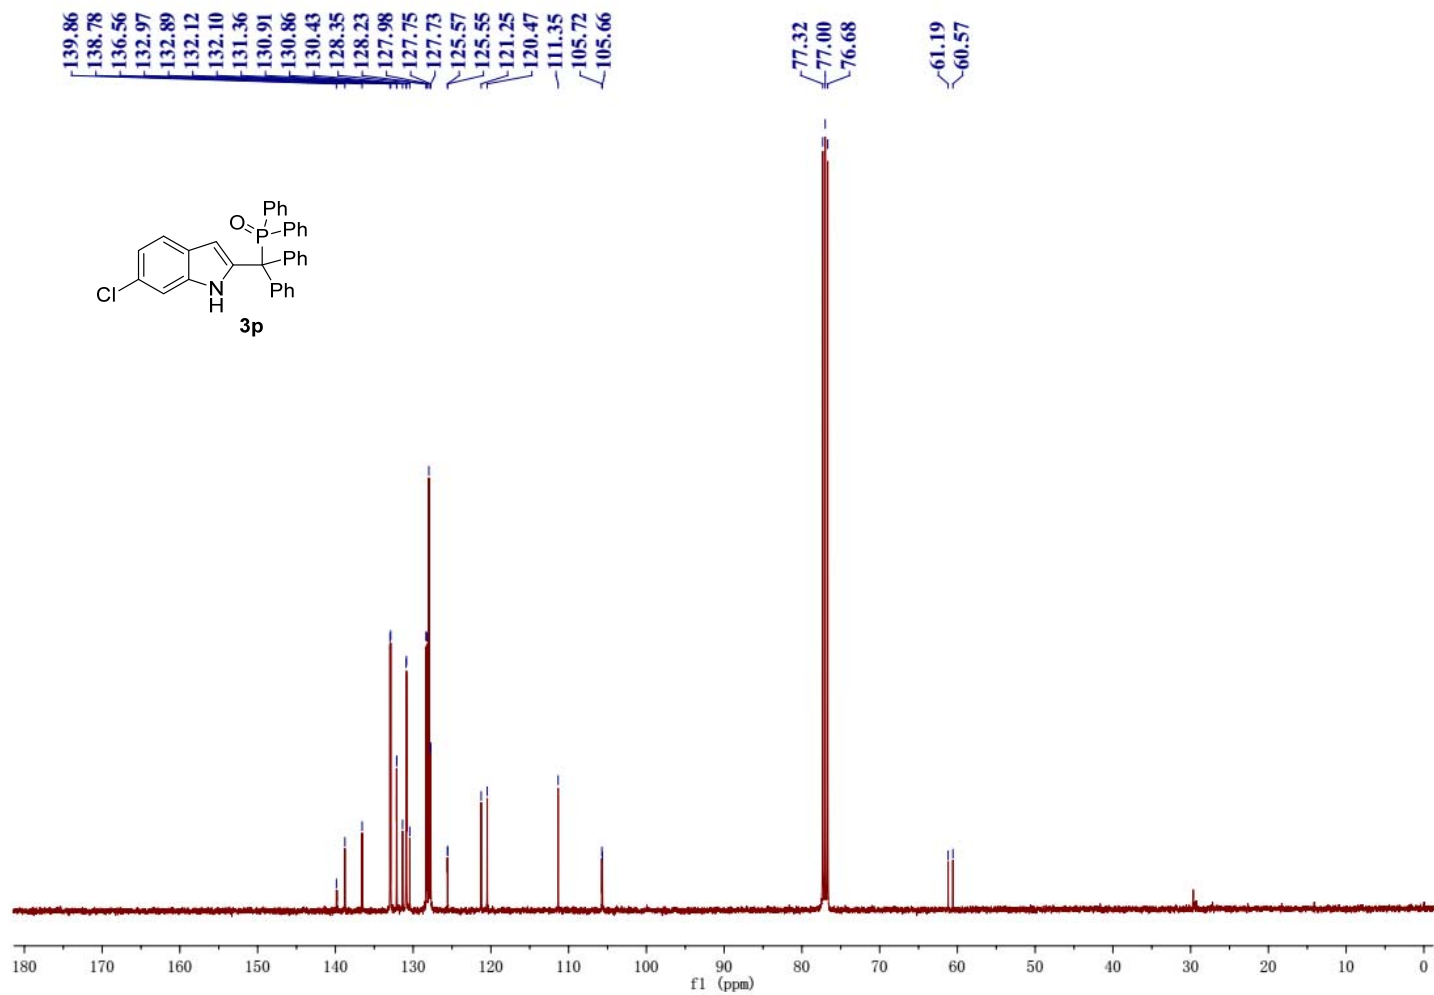



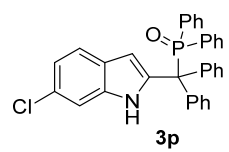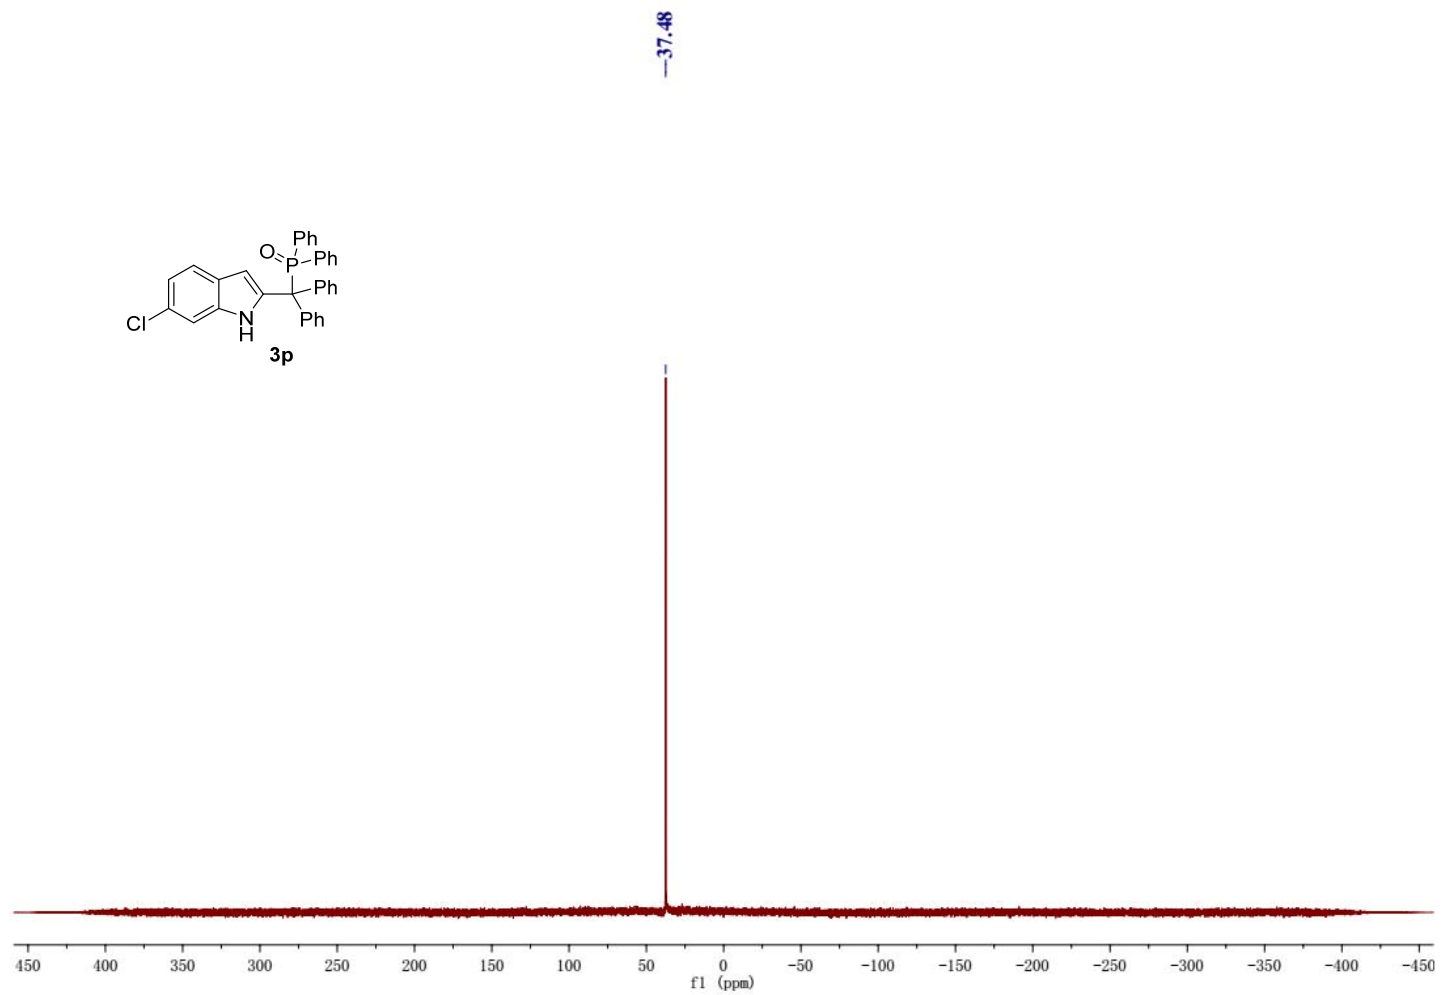

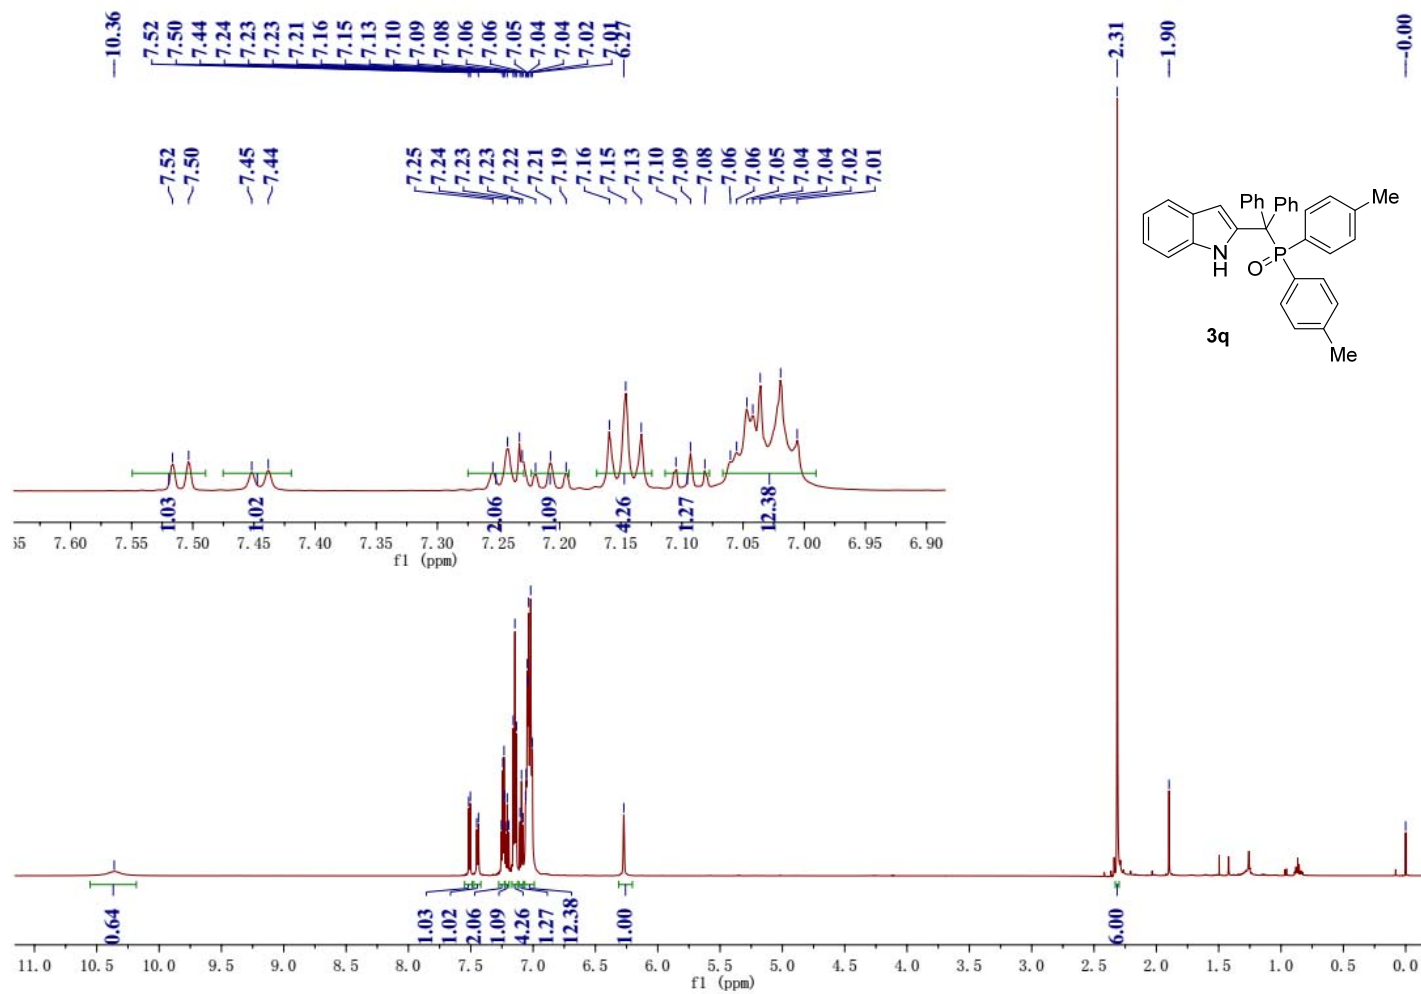

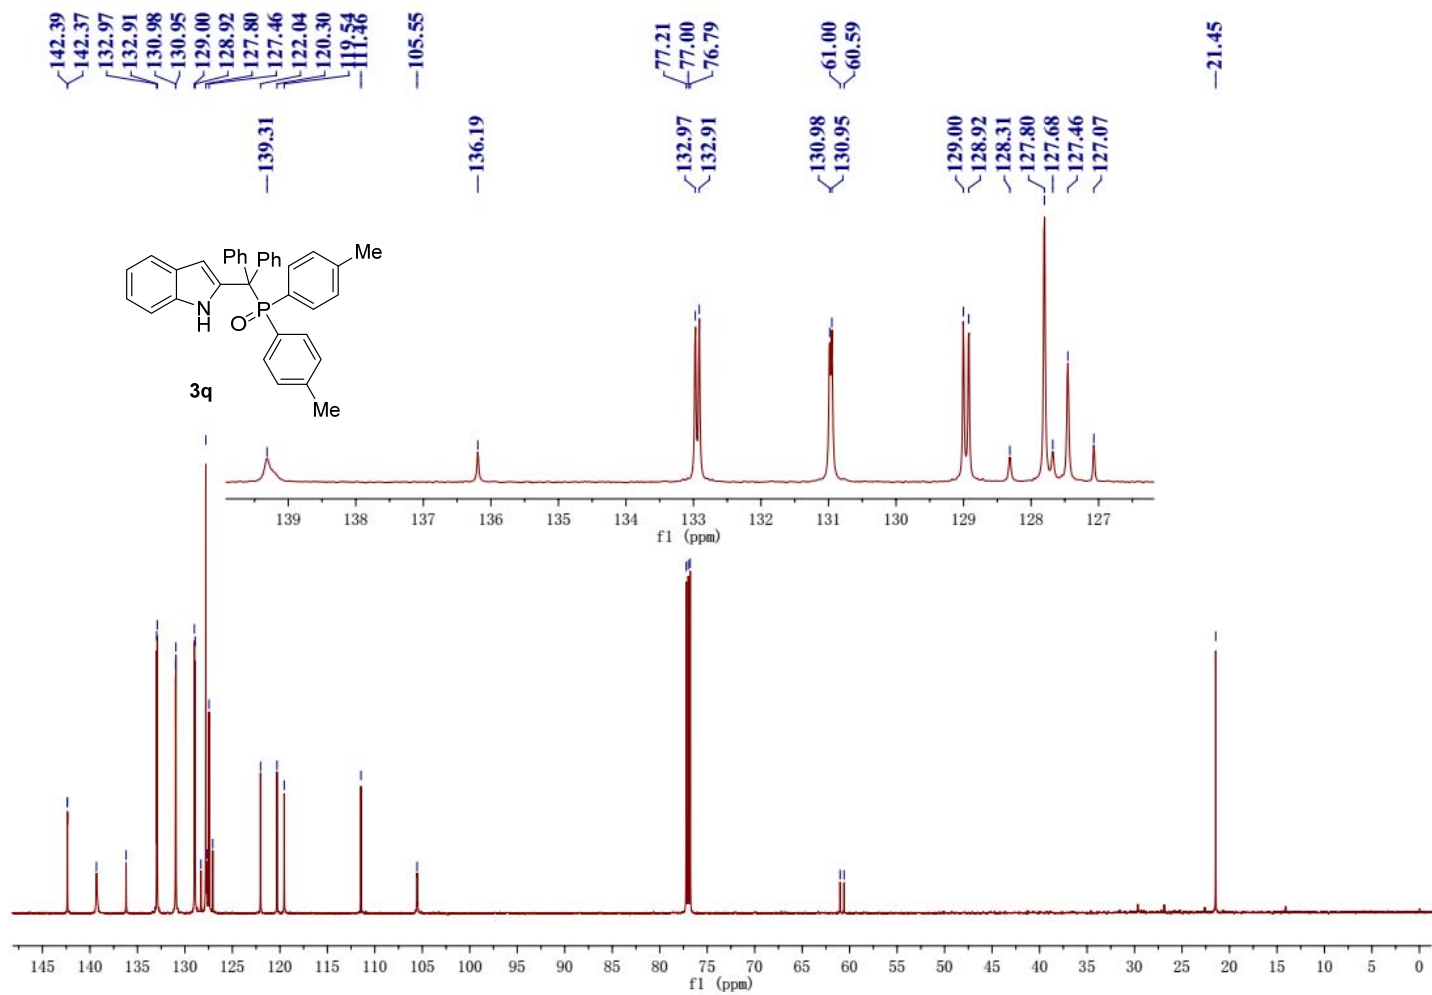

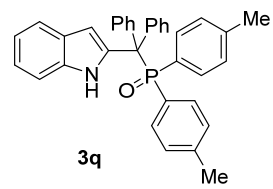

—37.80

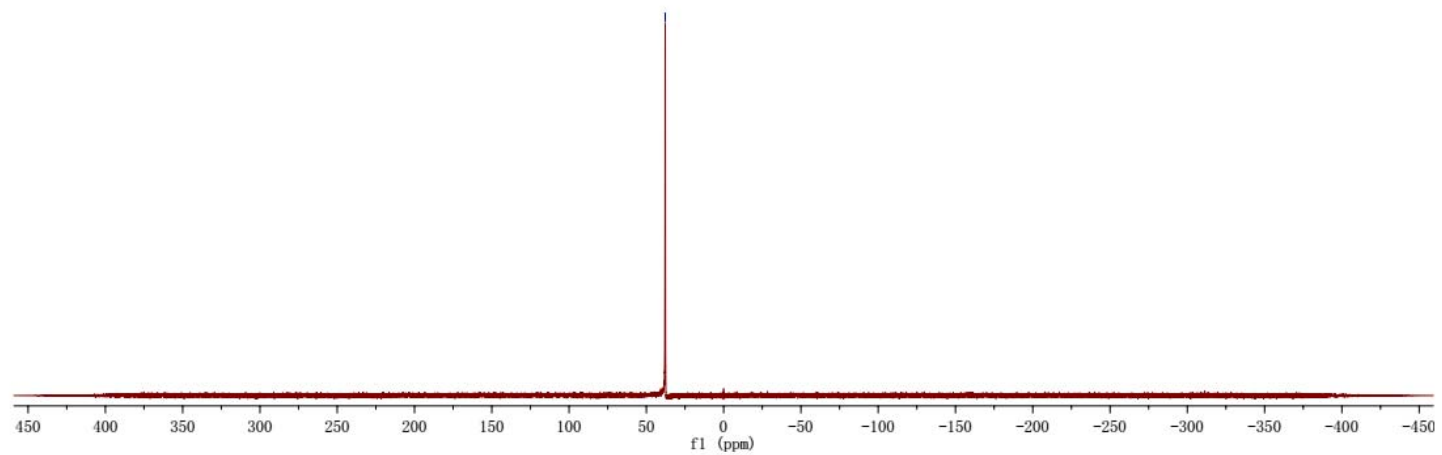

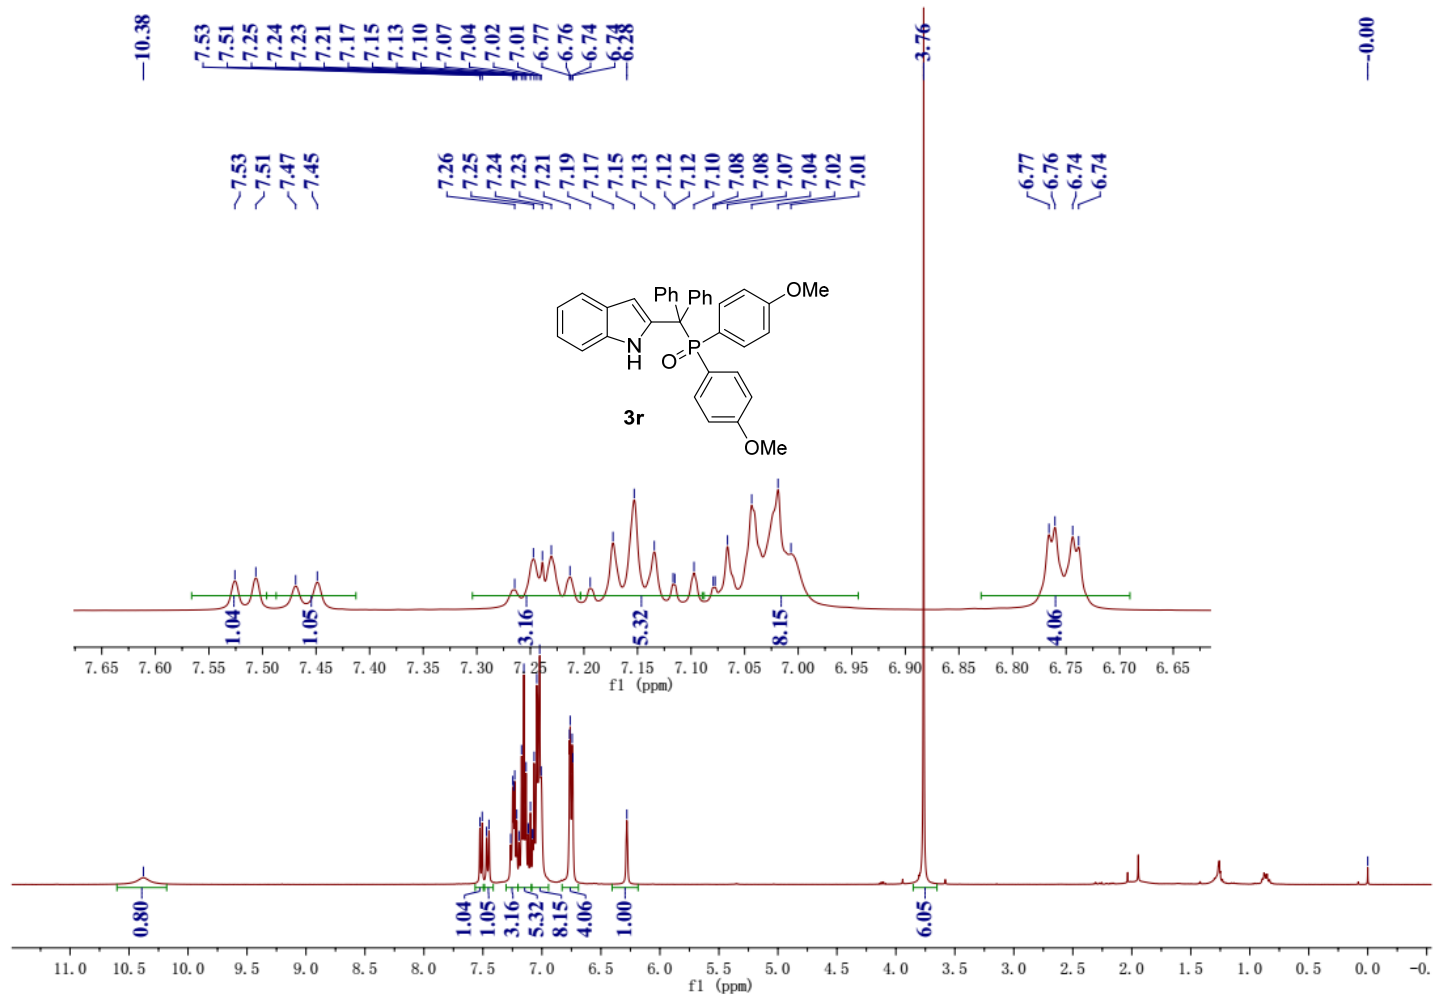

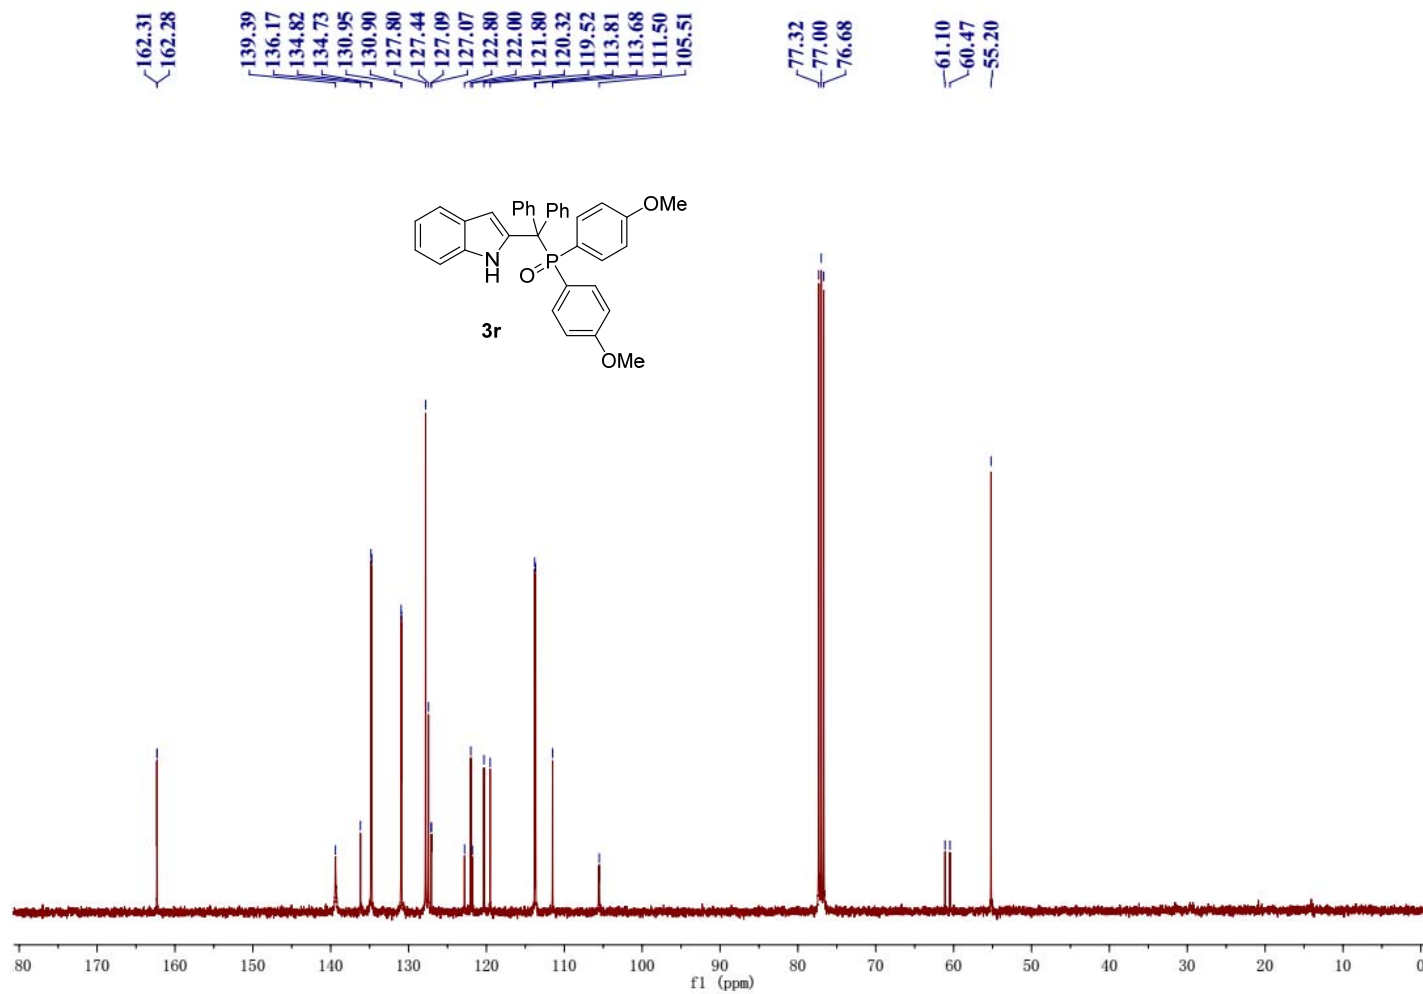

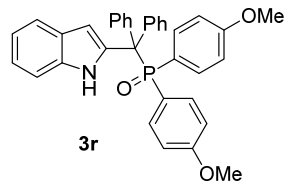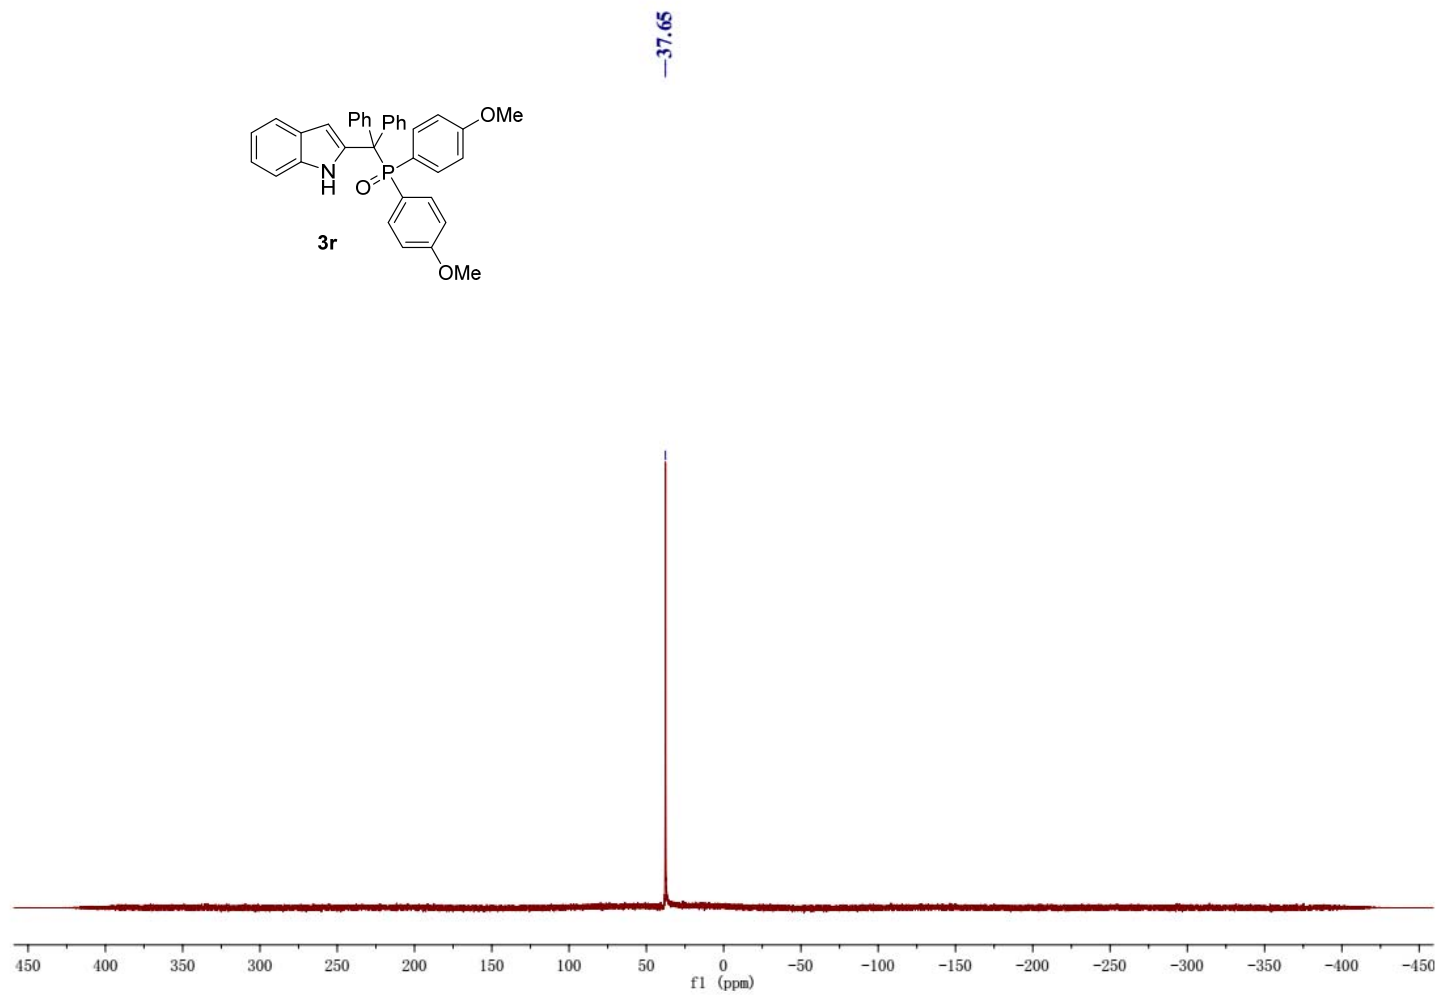

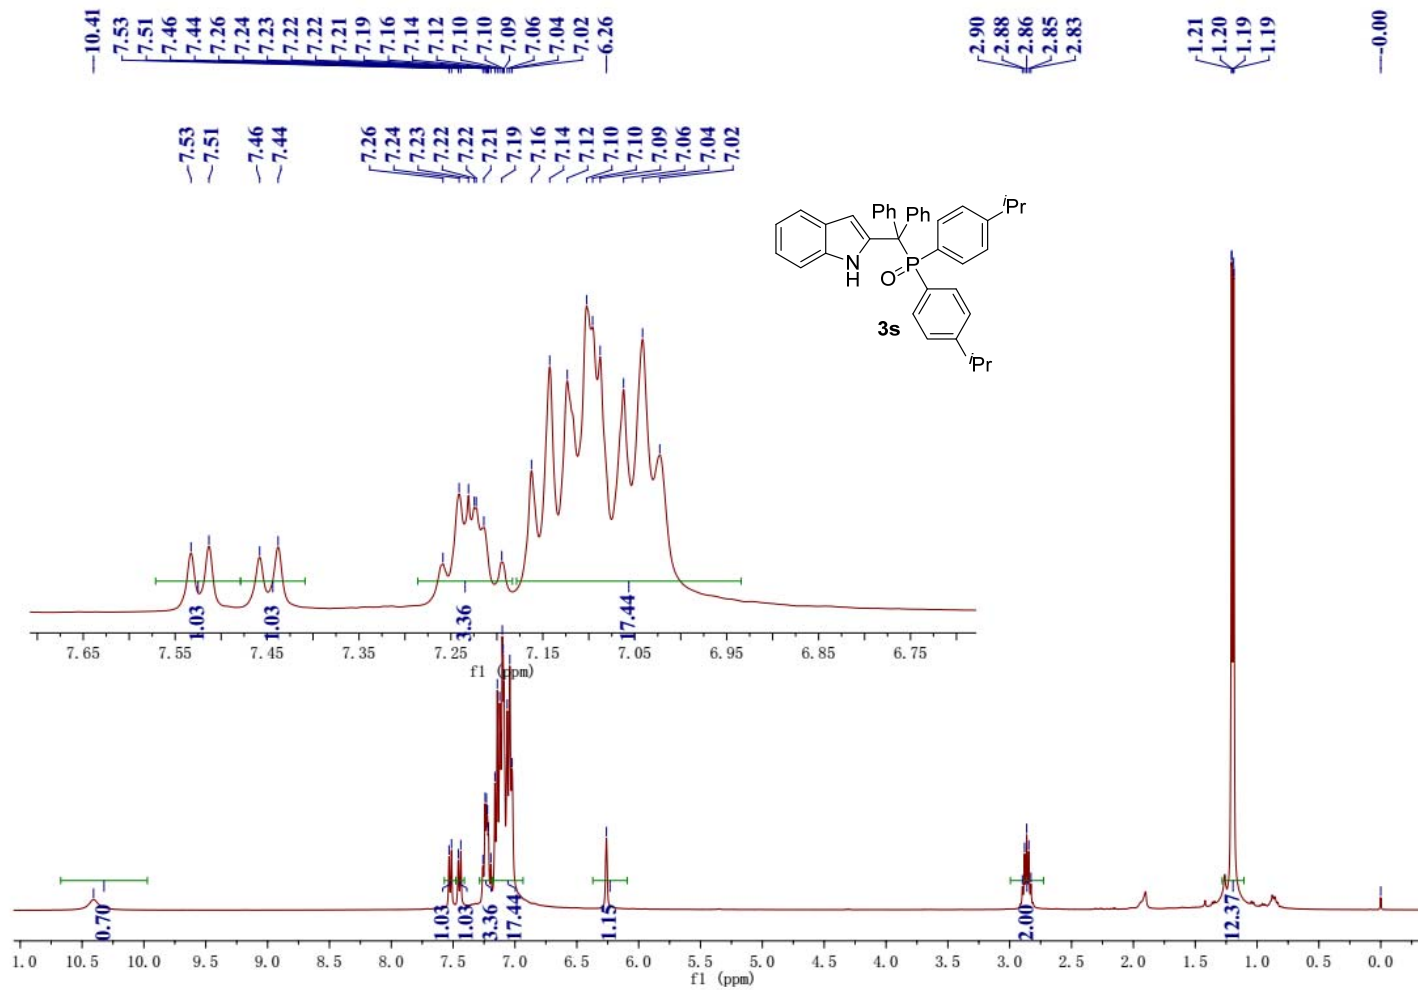



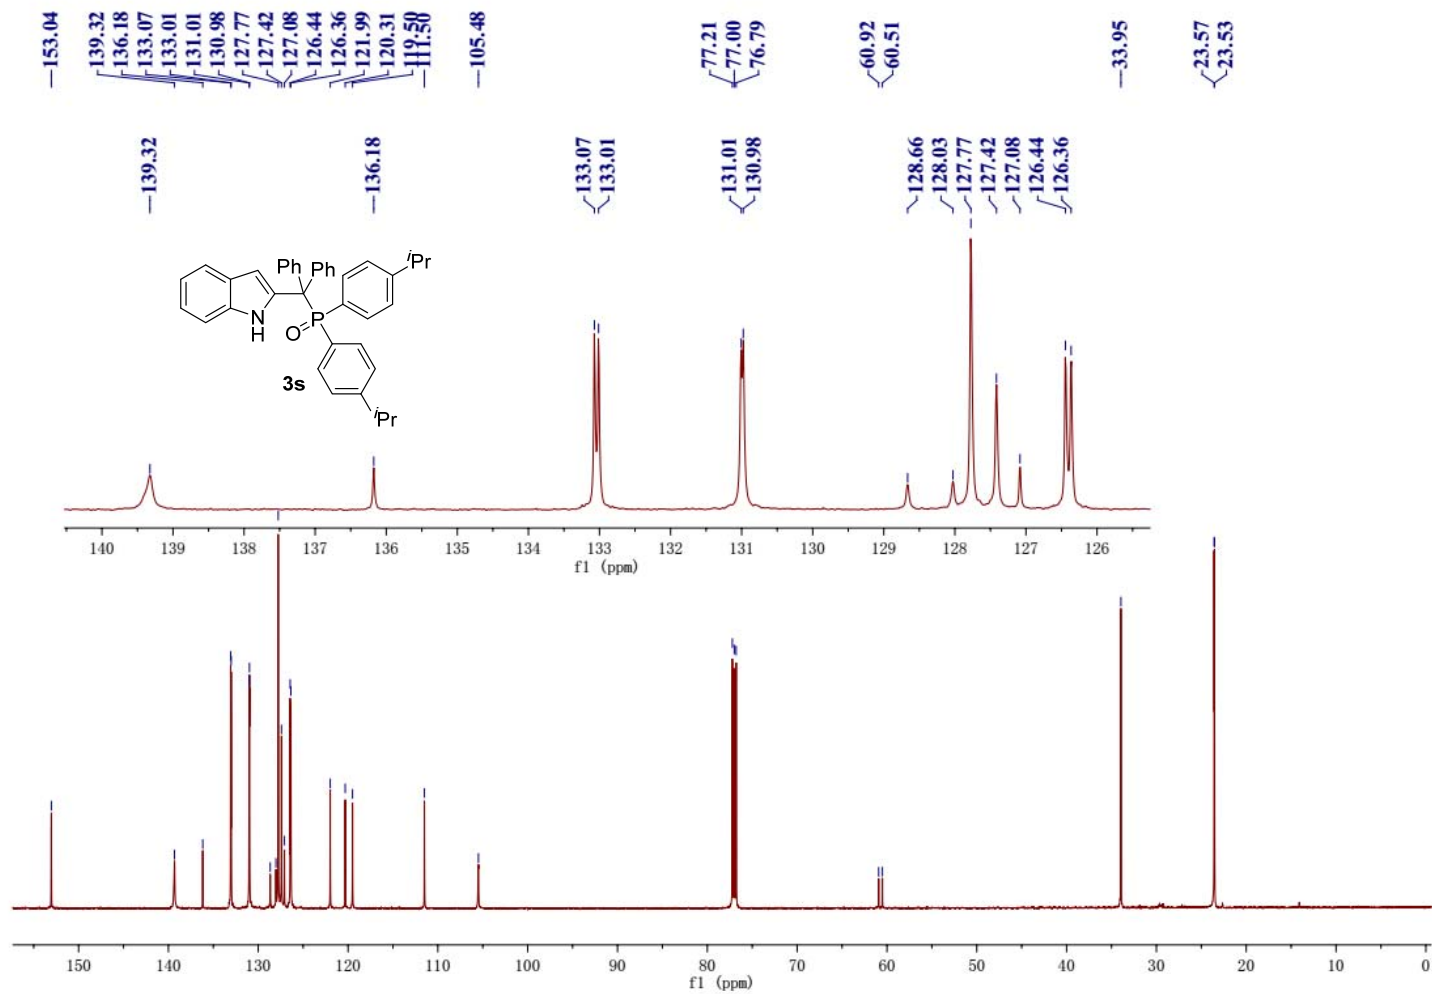

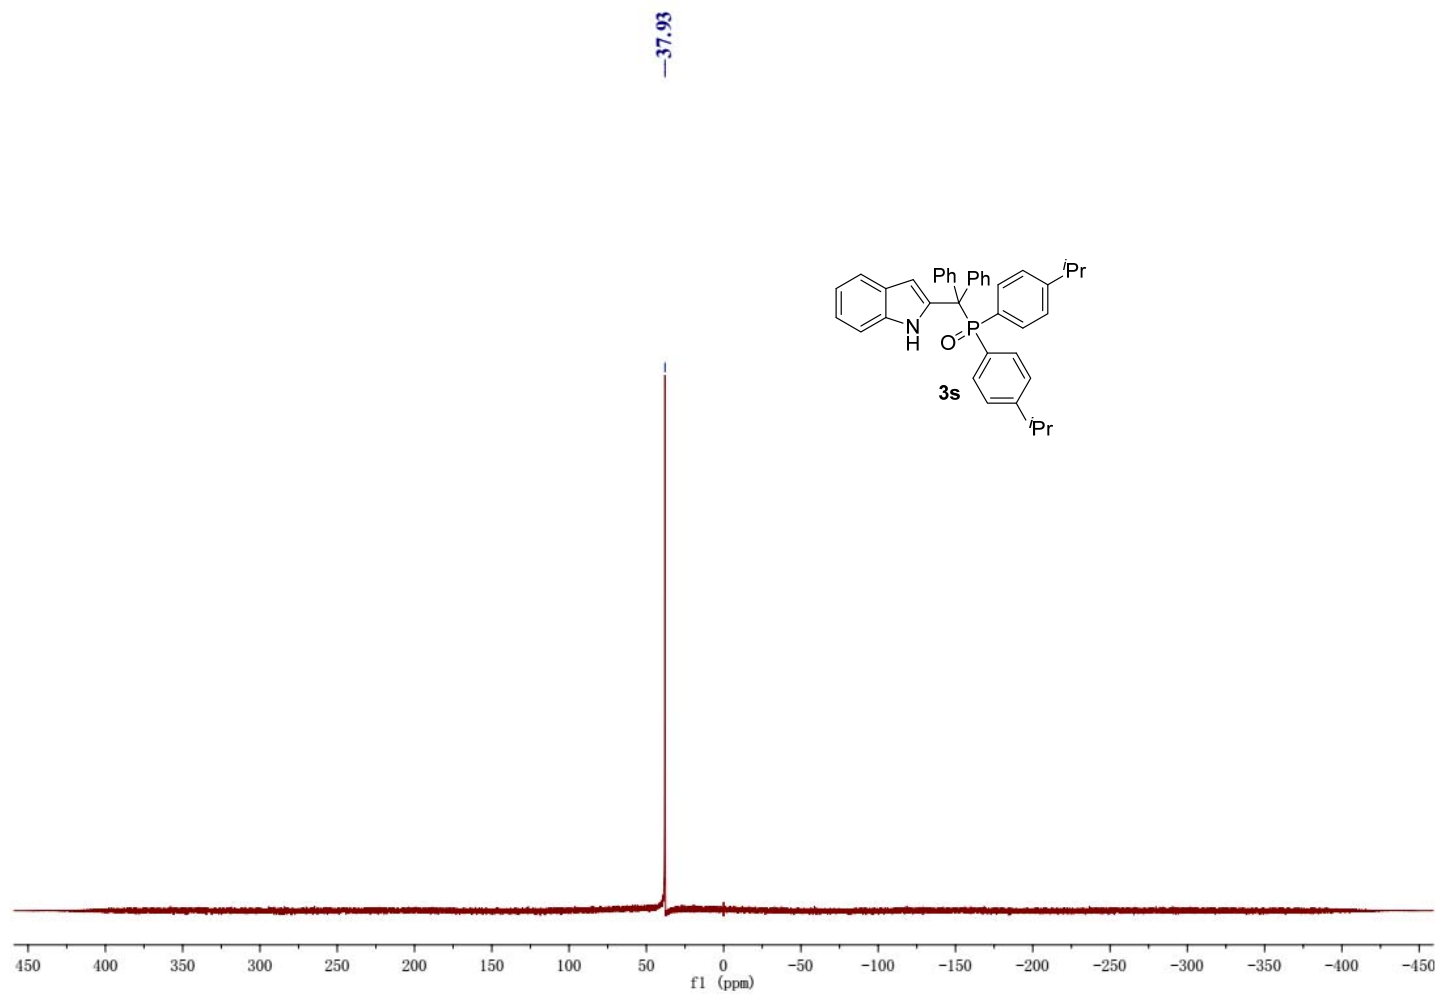

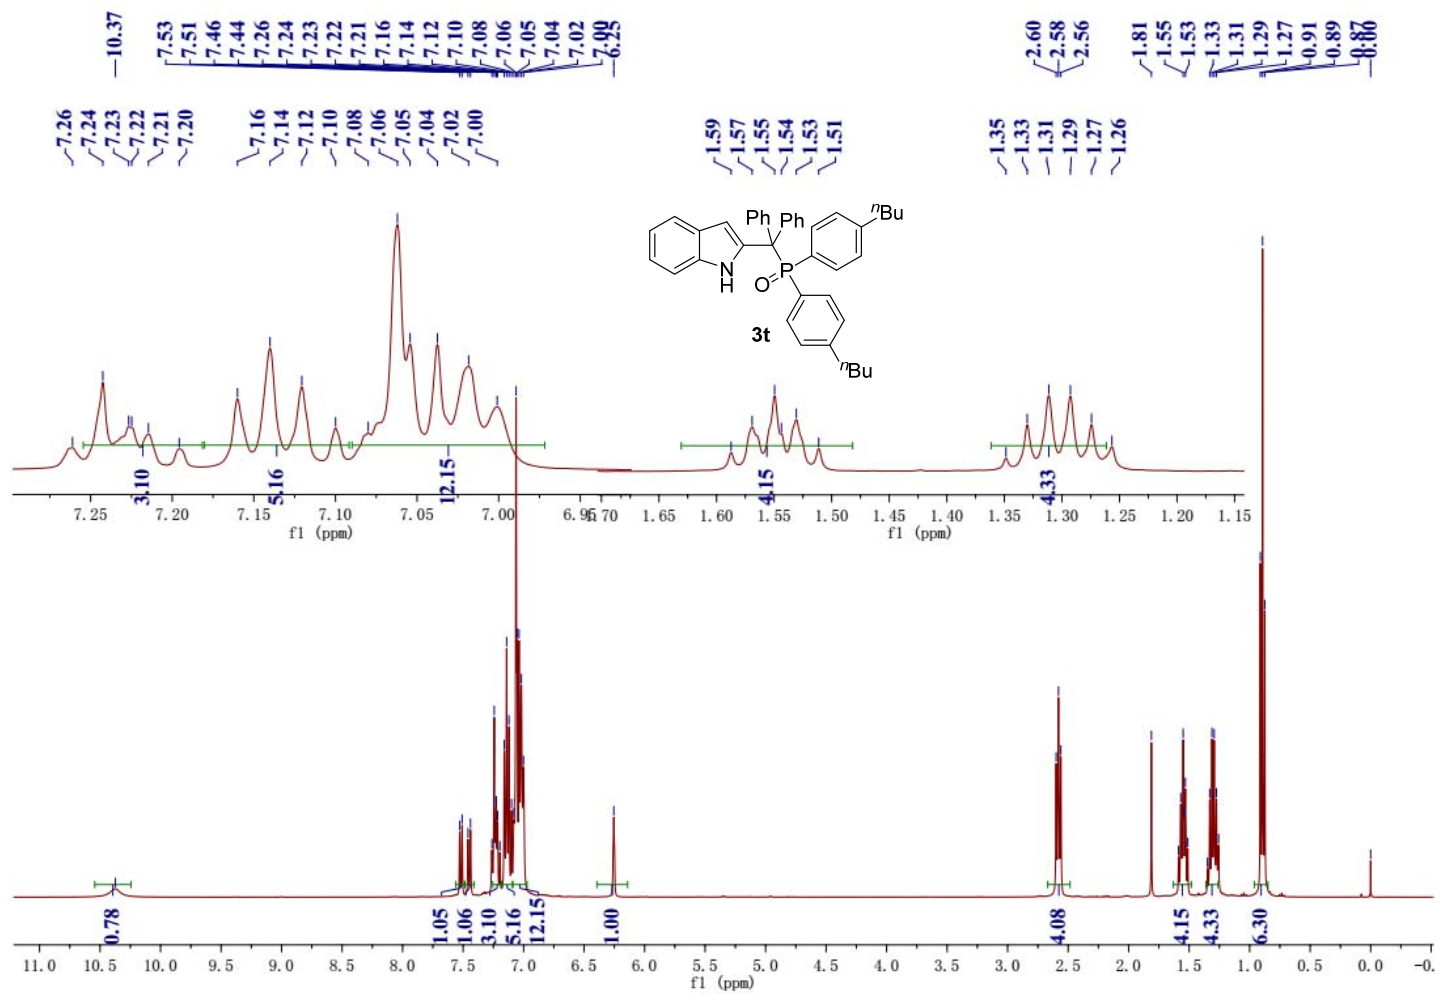

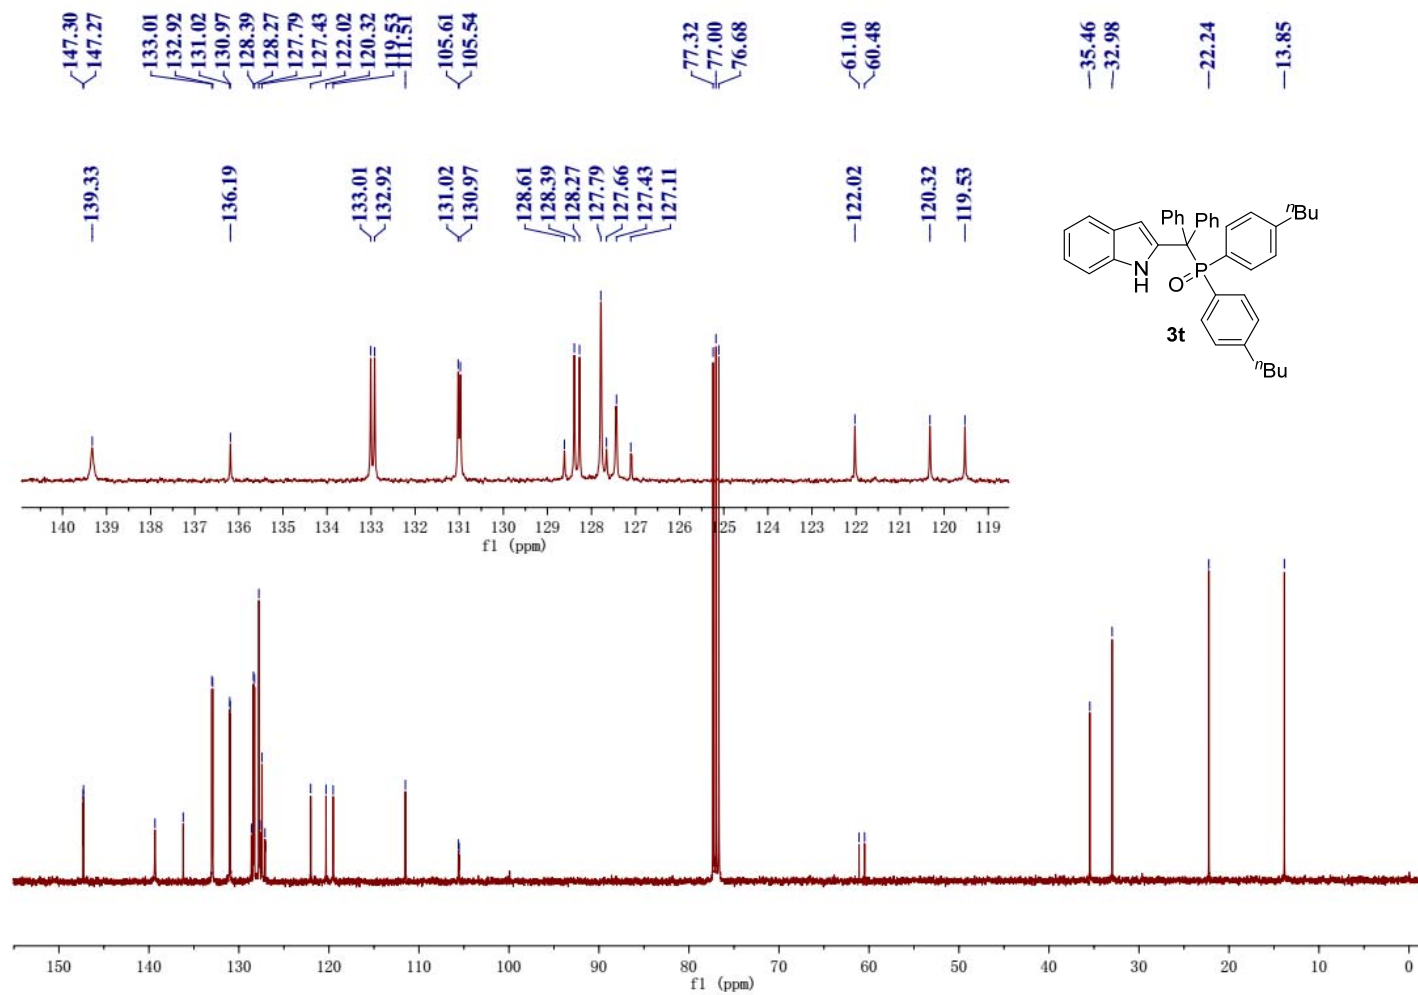

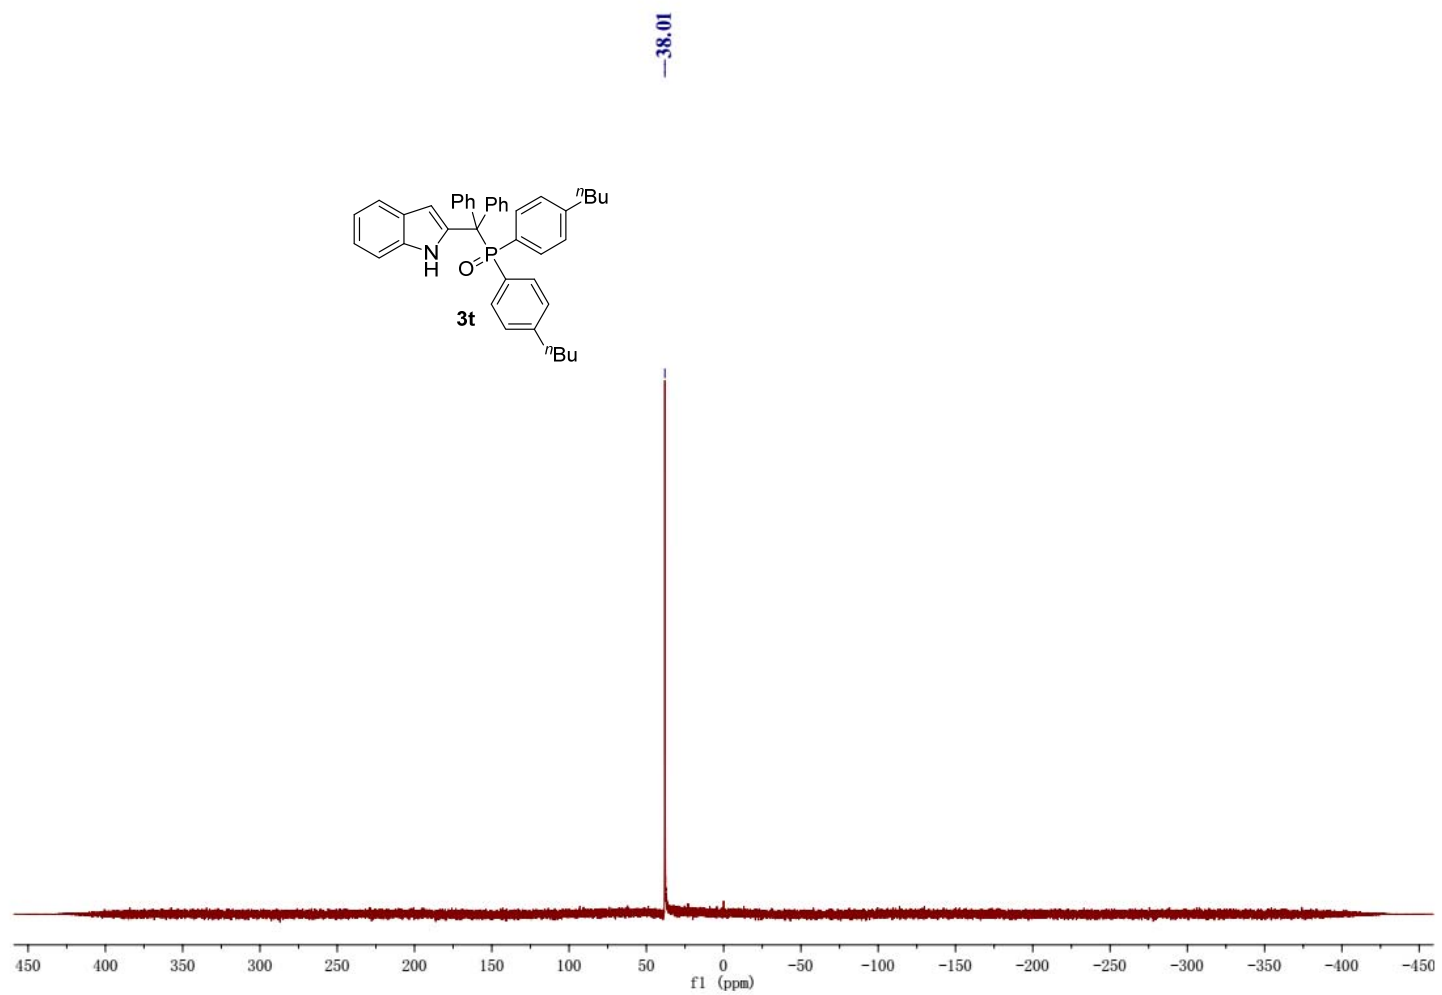

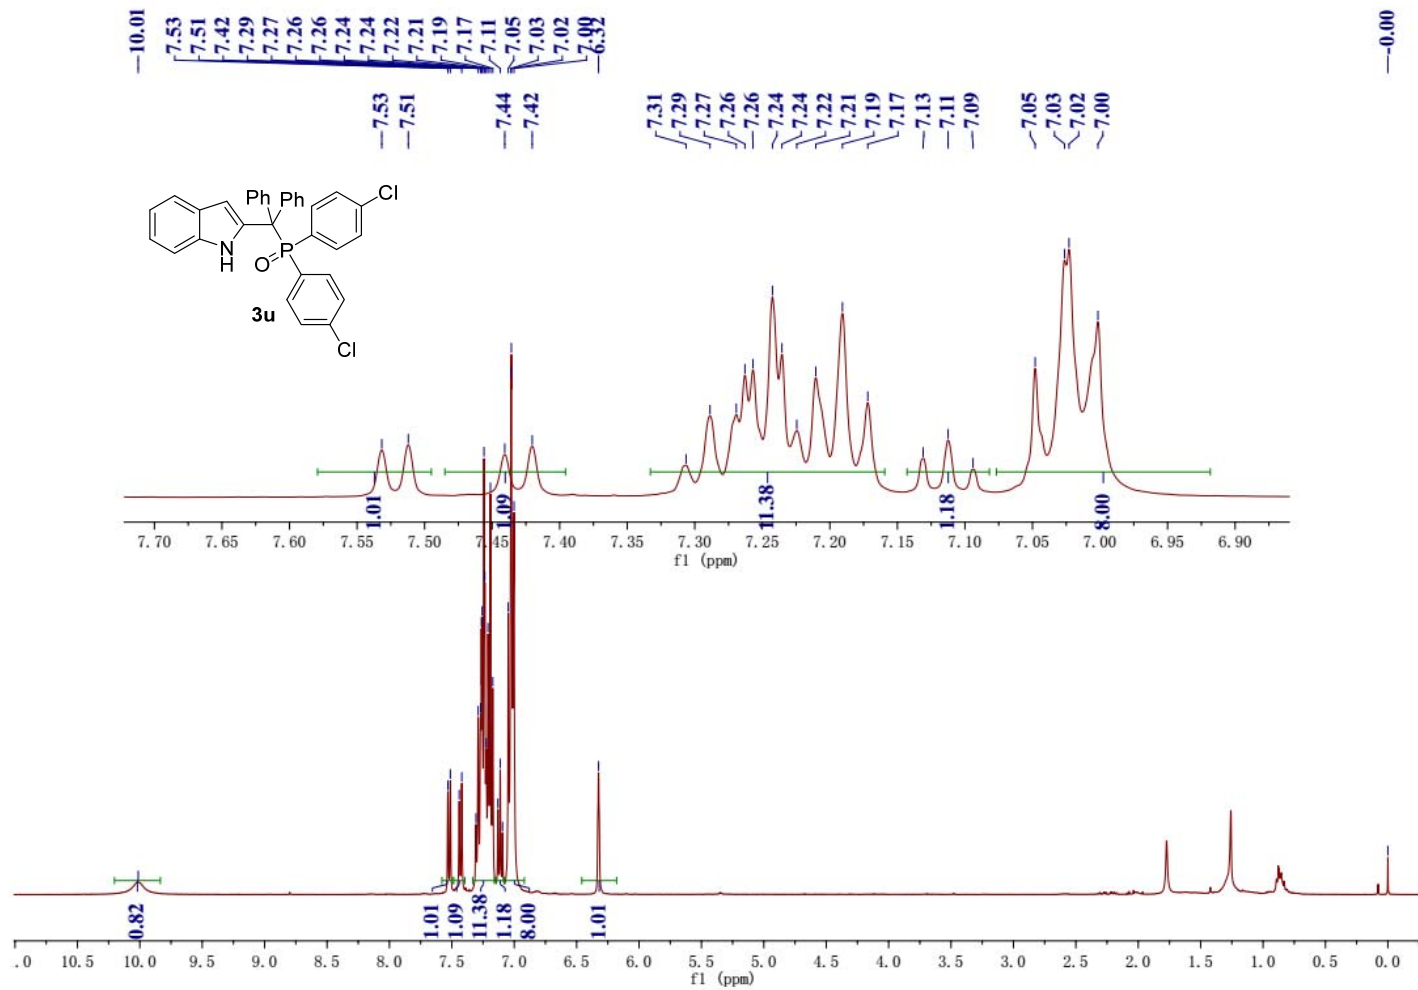

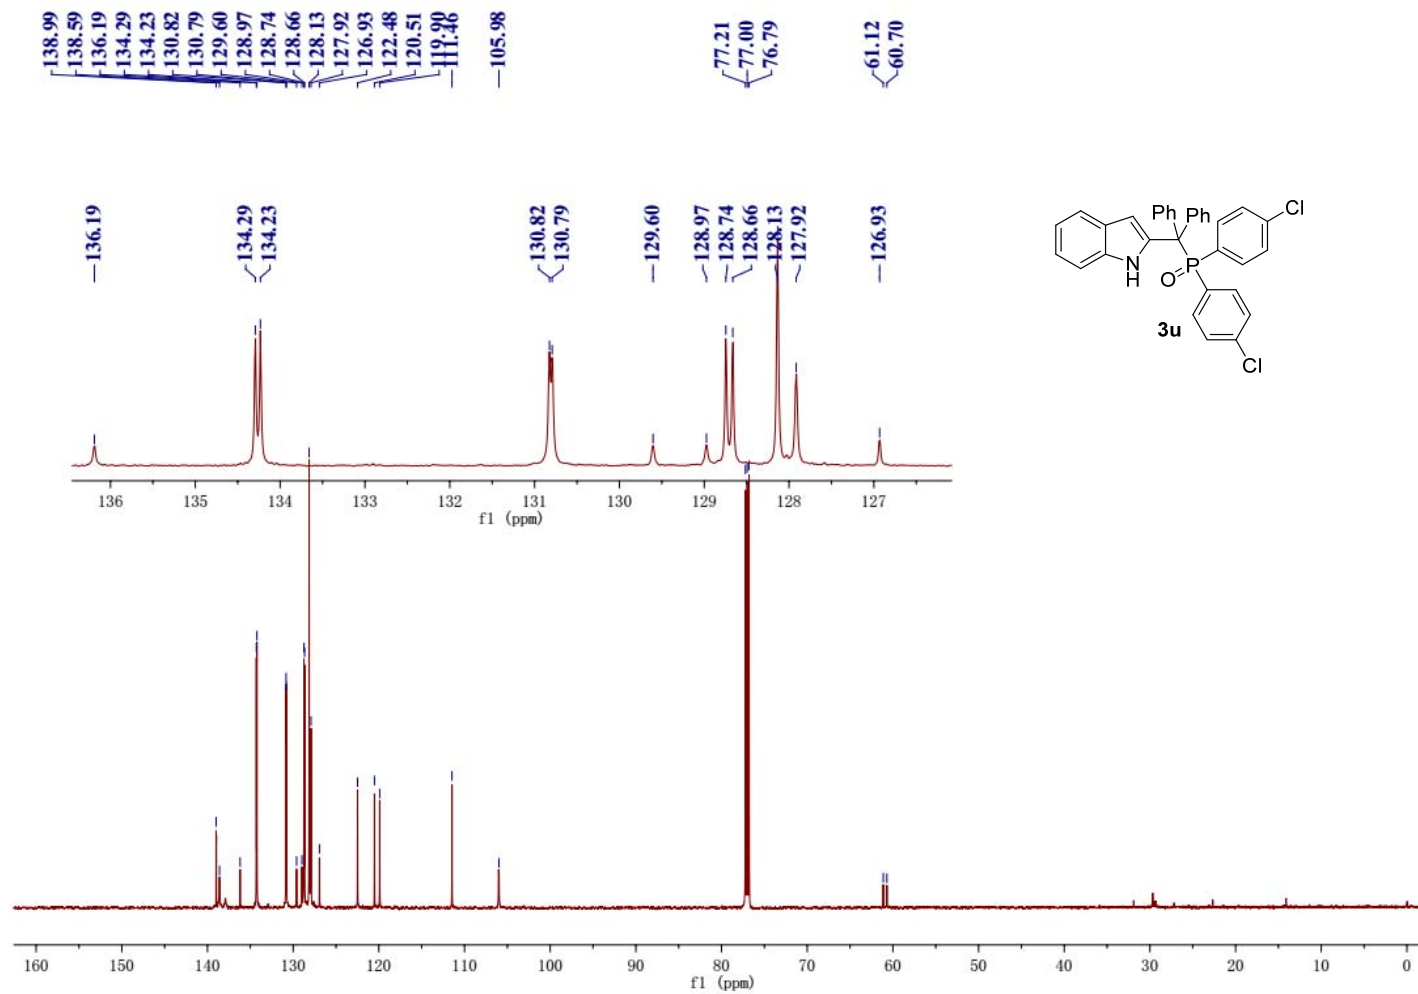

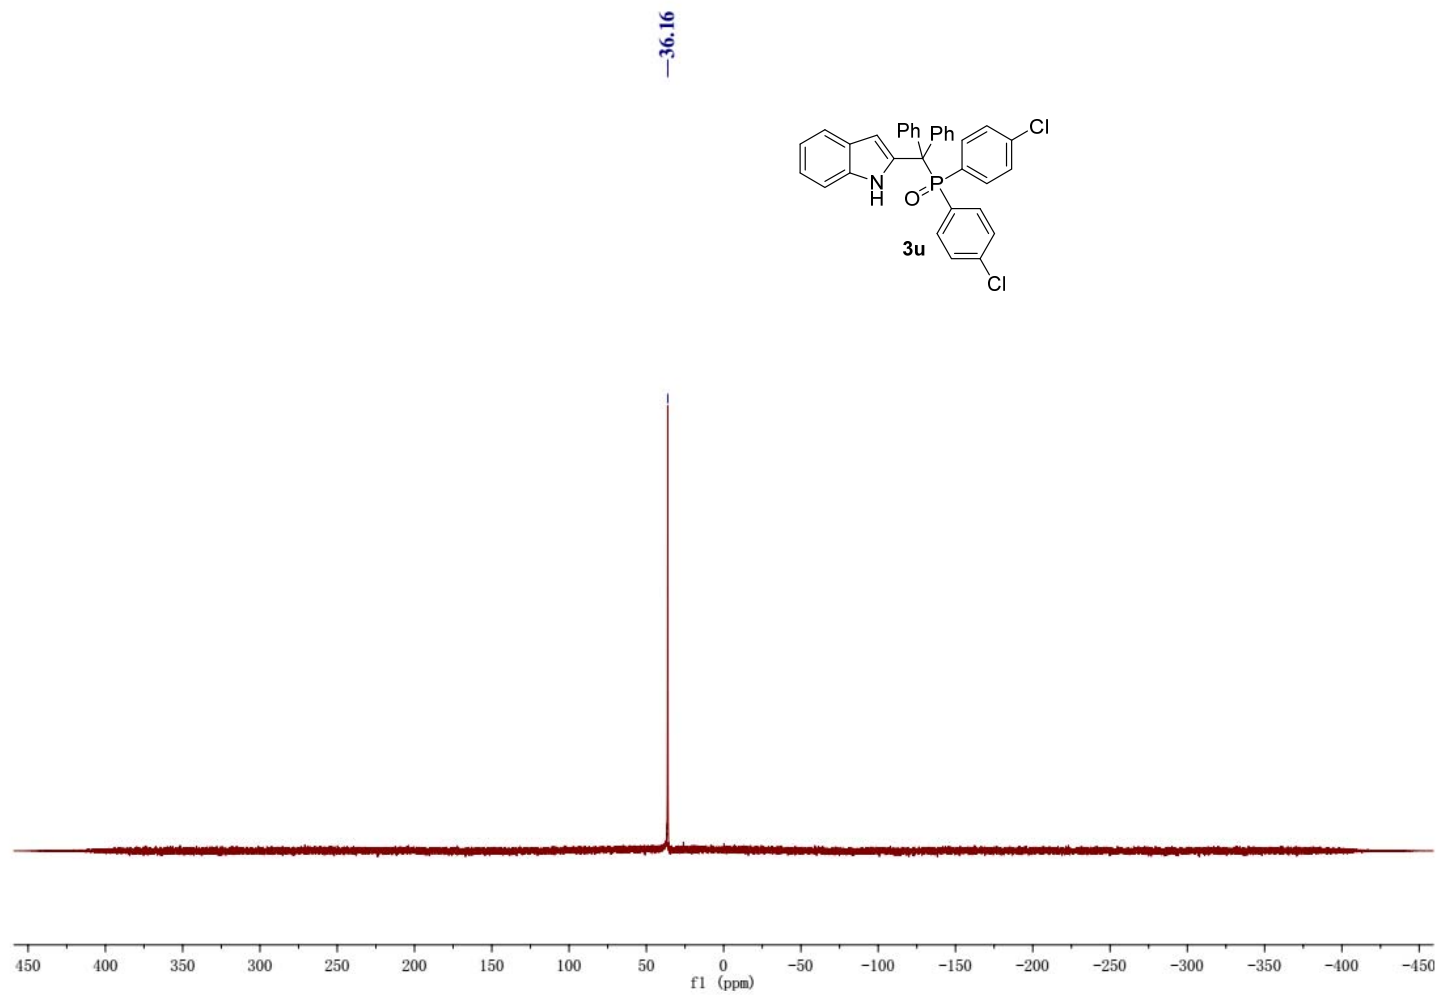



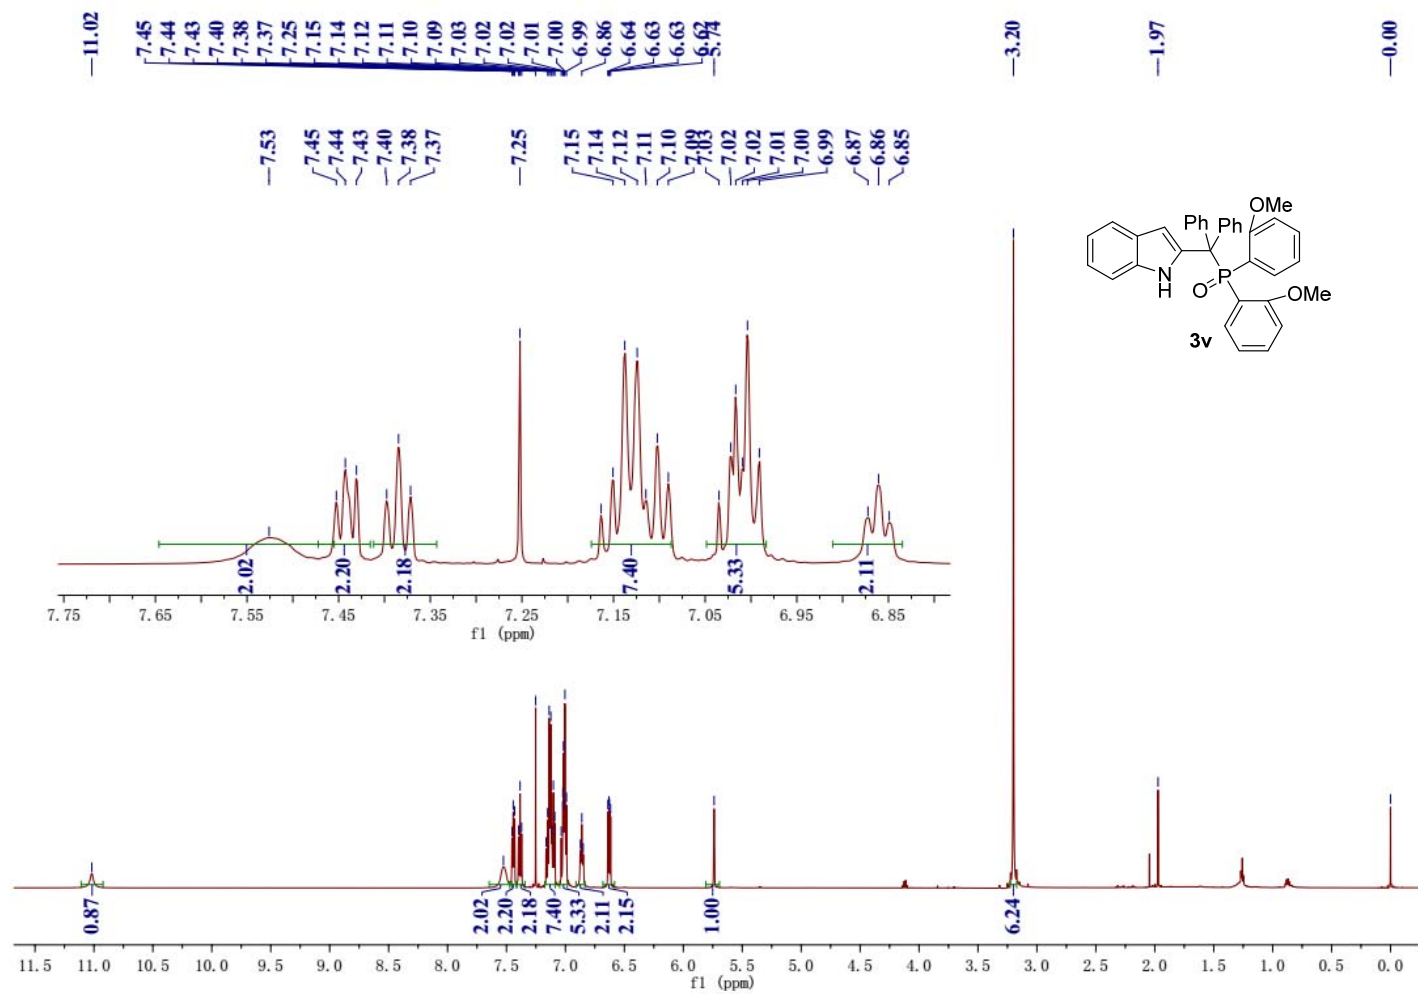

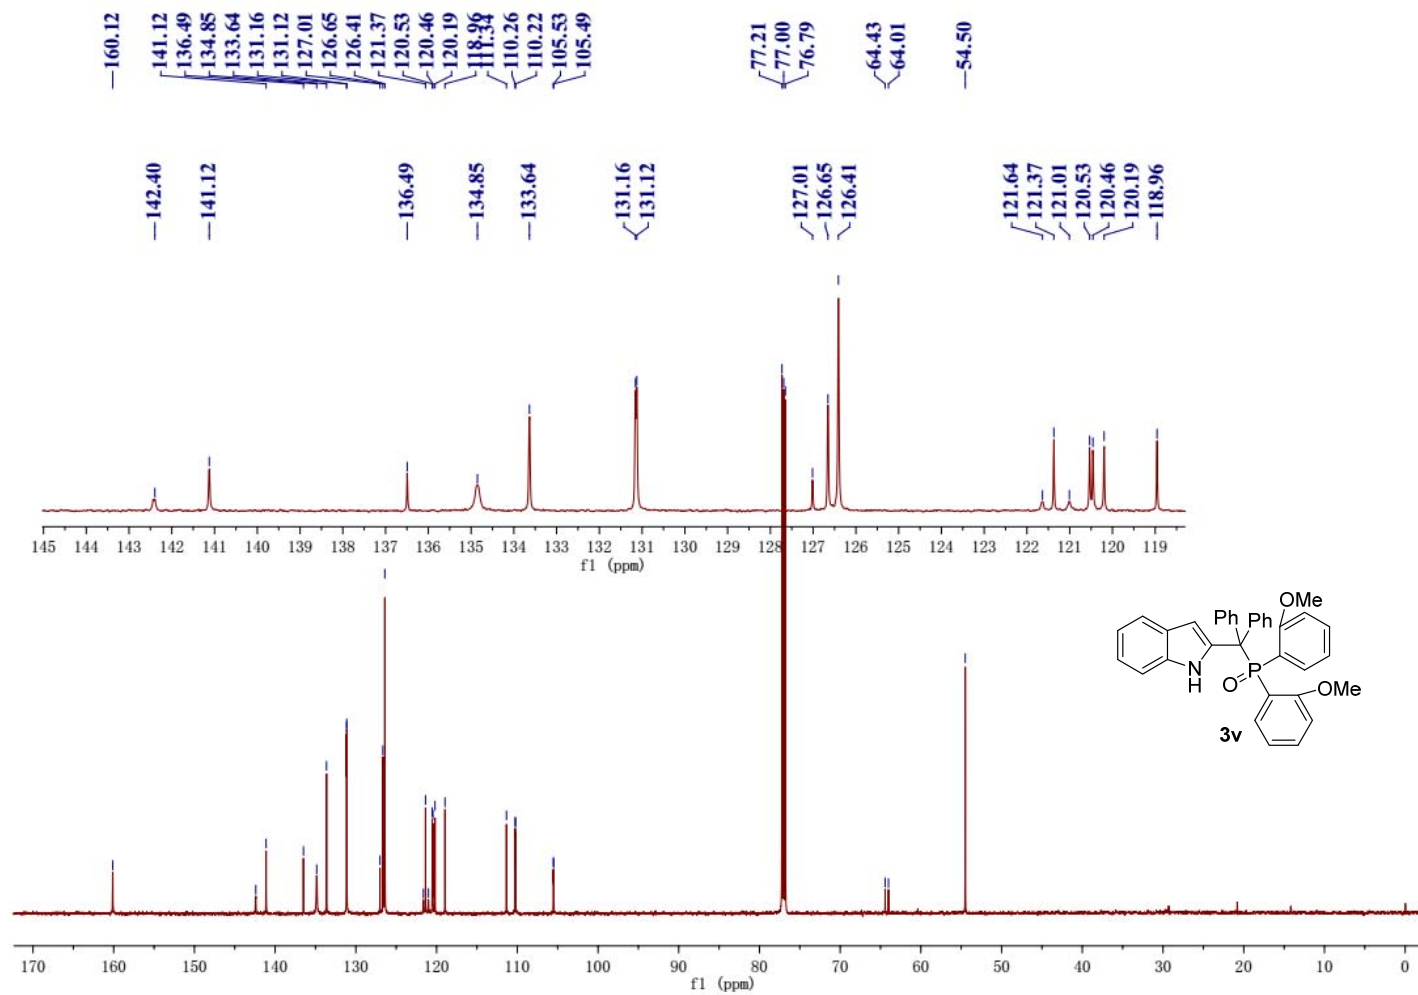

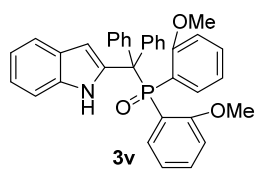

47.48

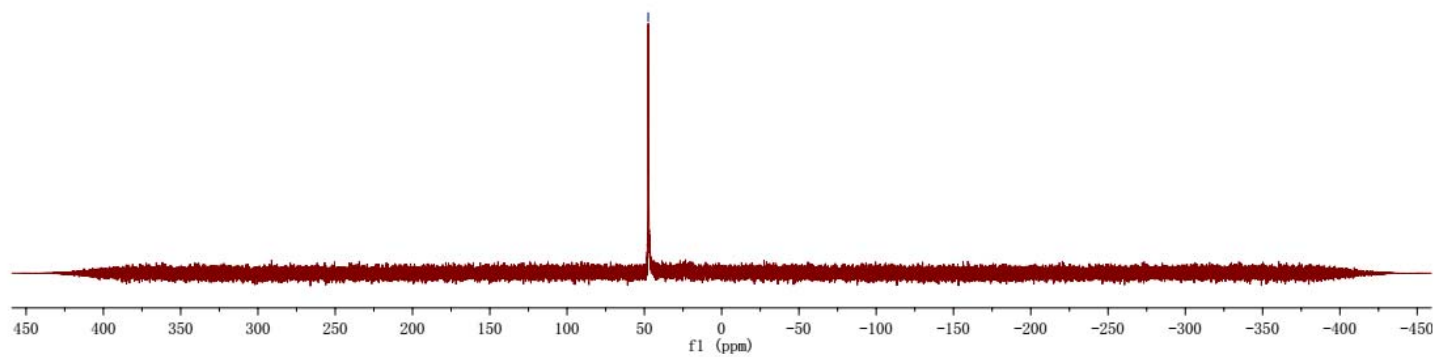

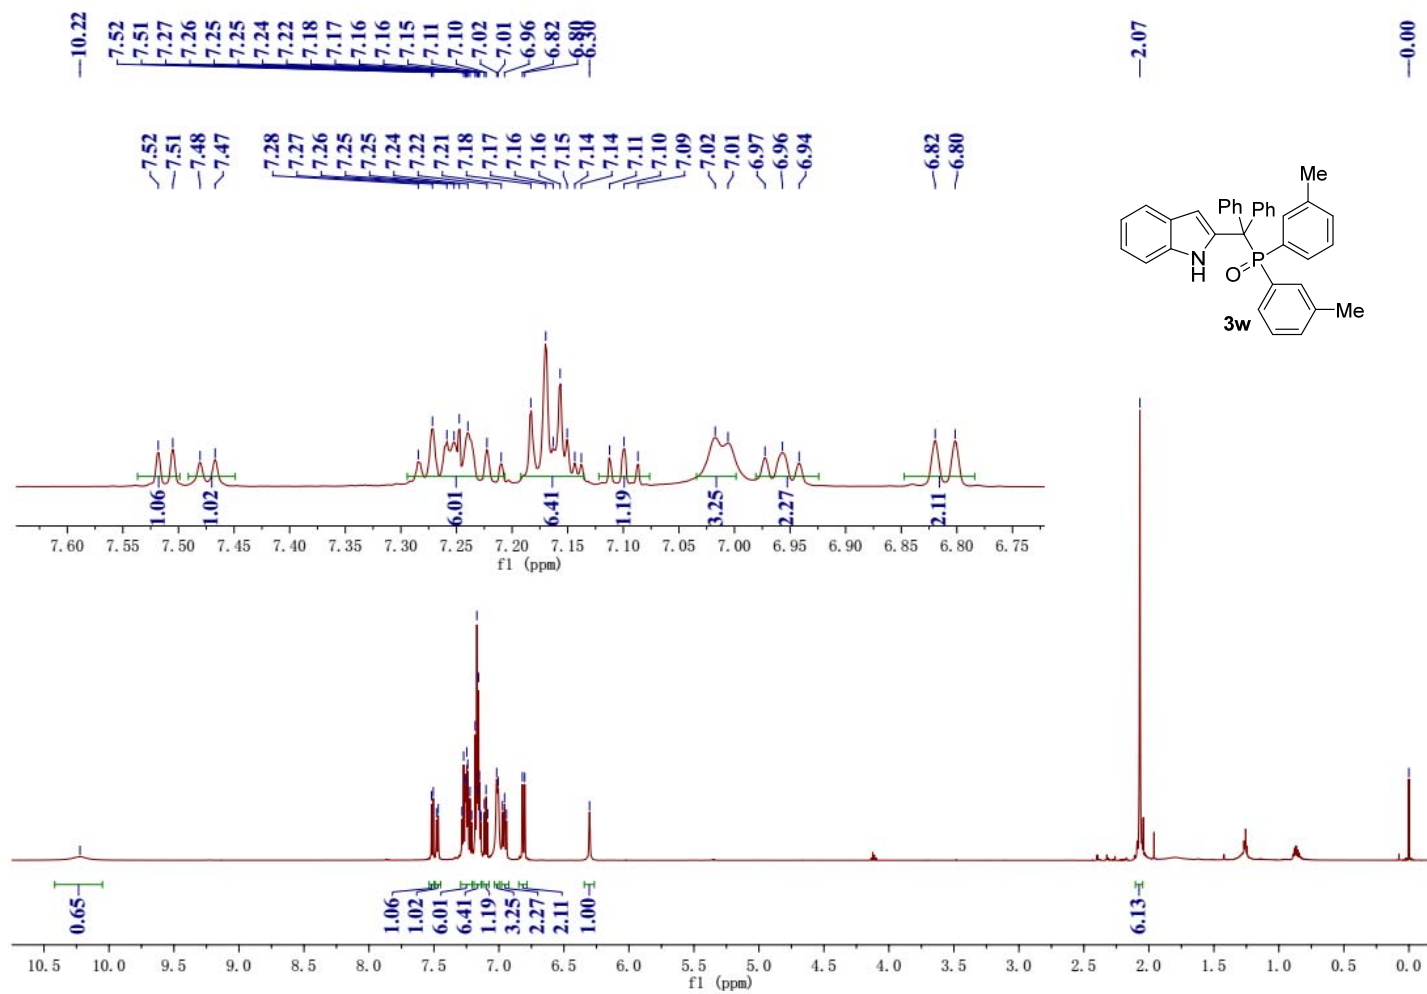

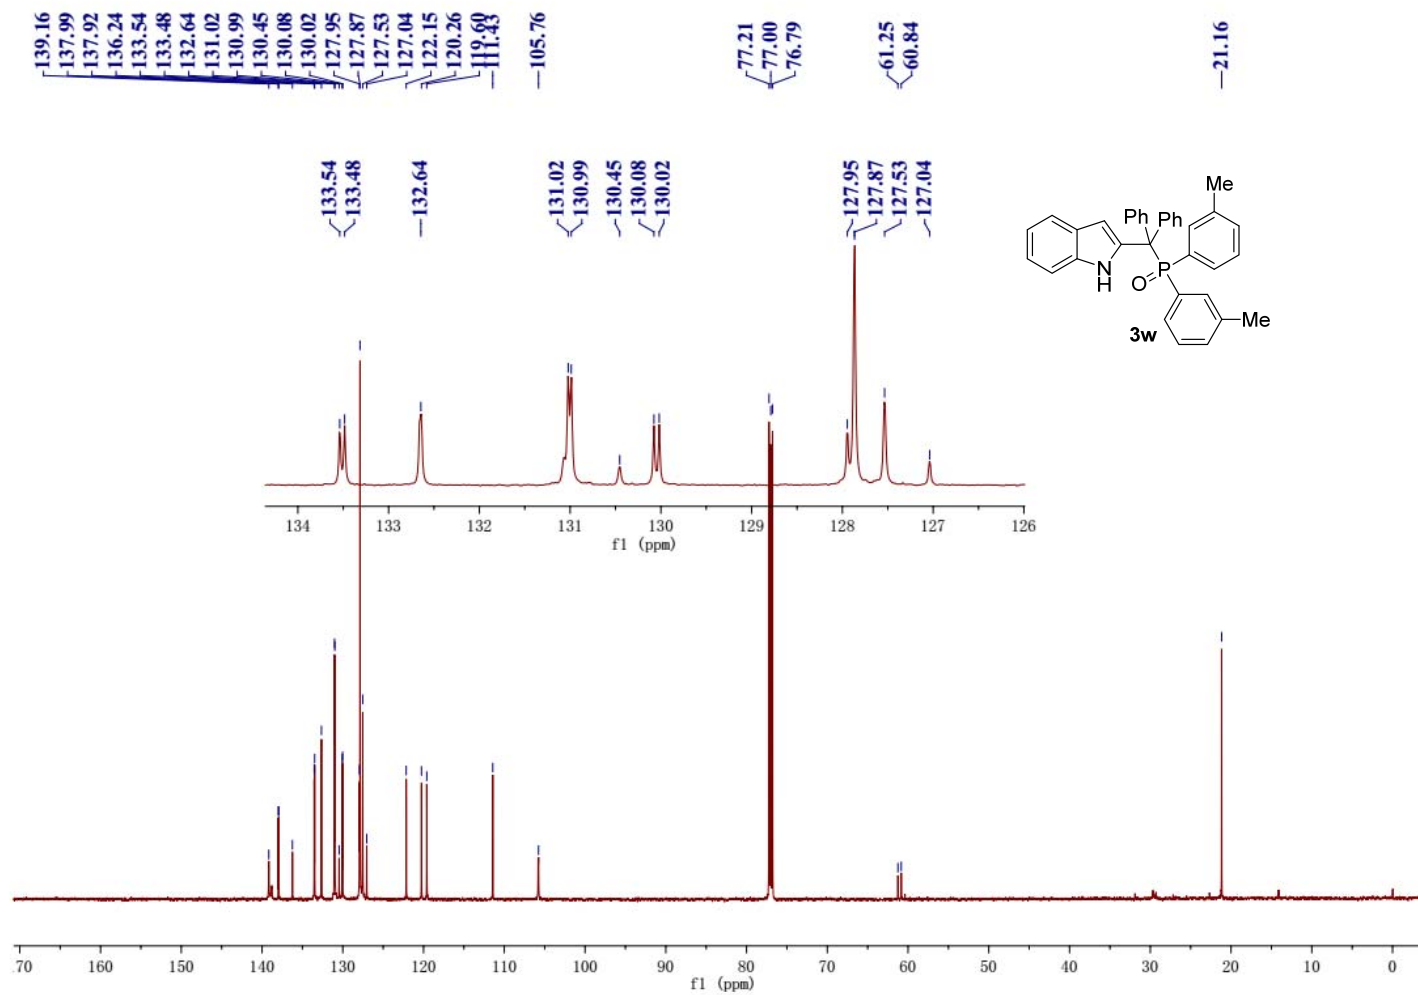

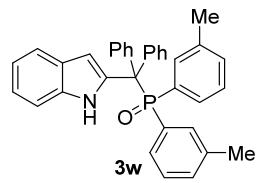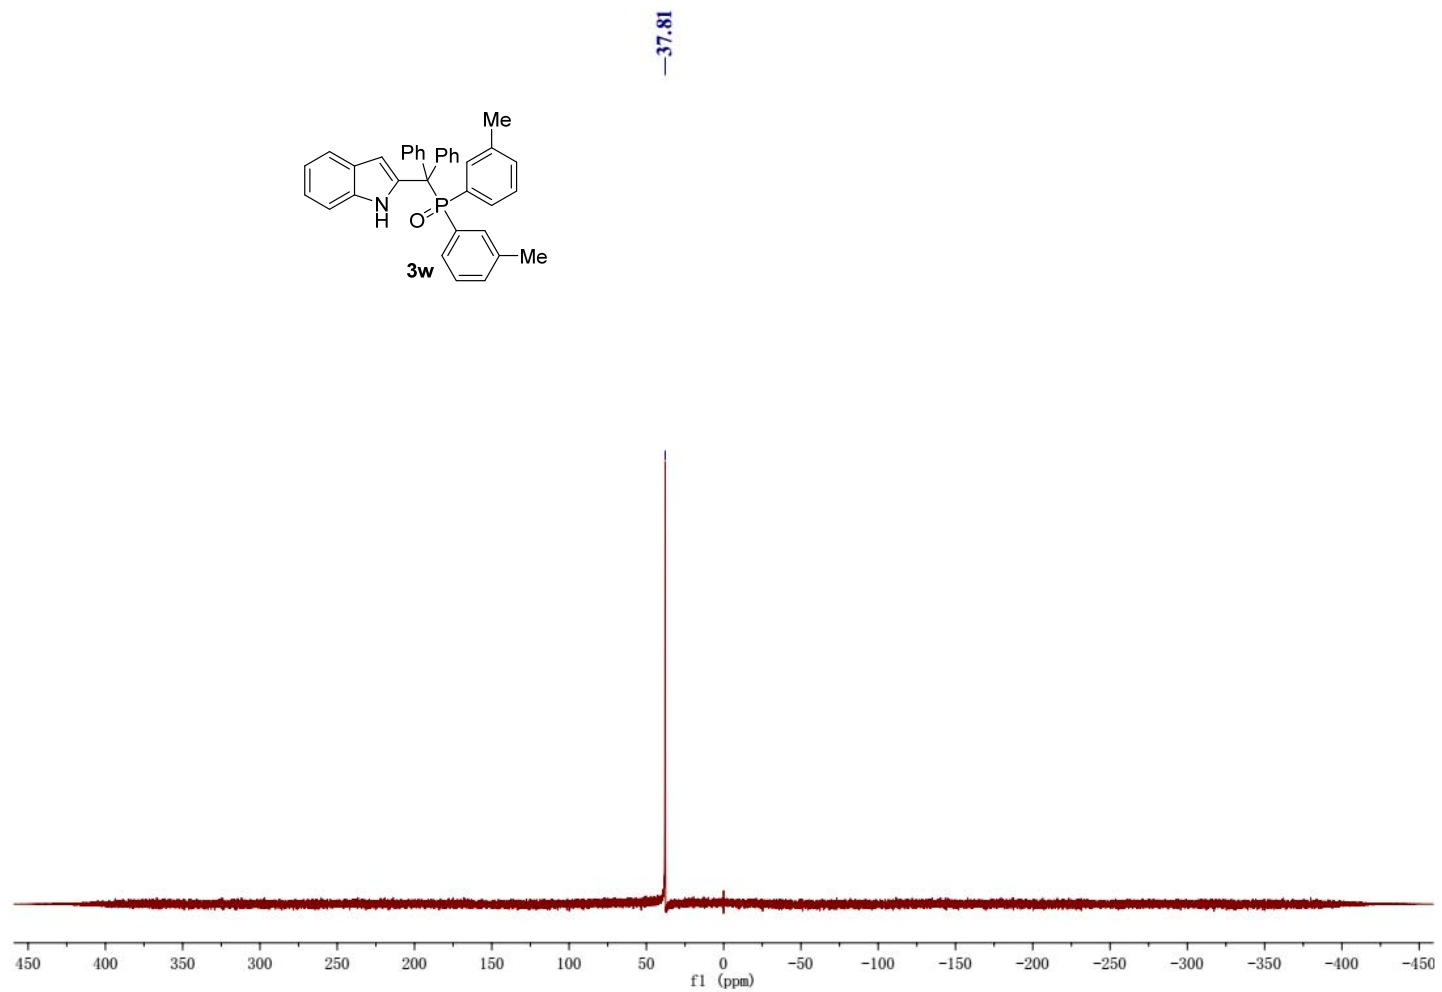

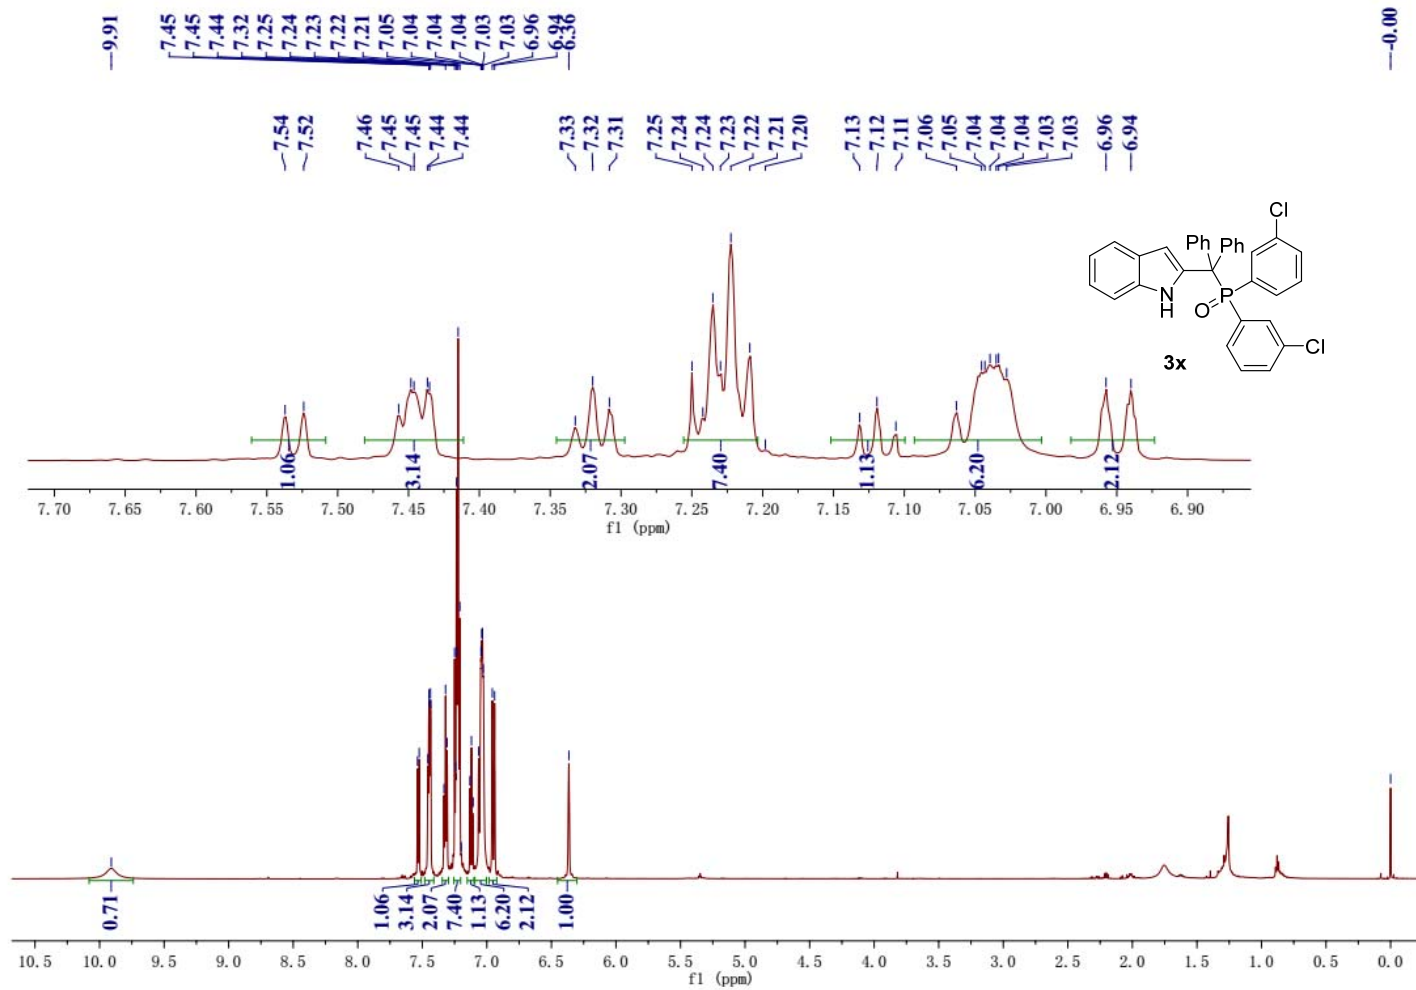

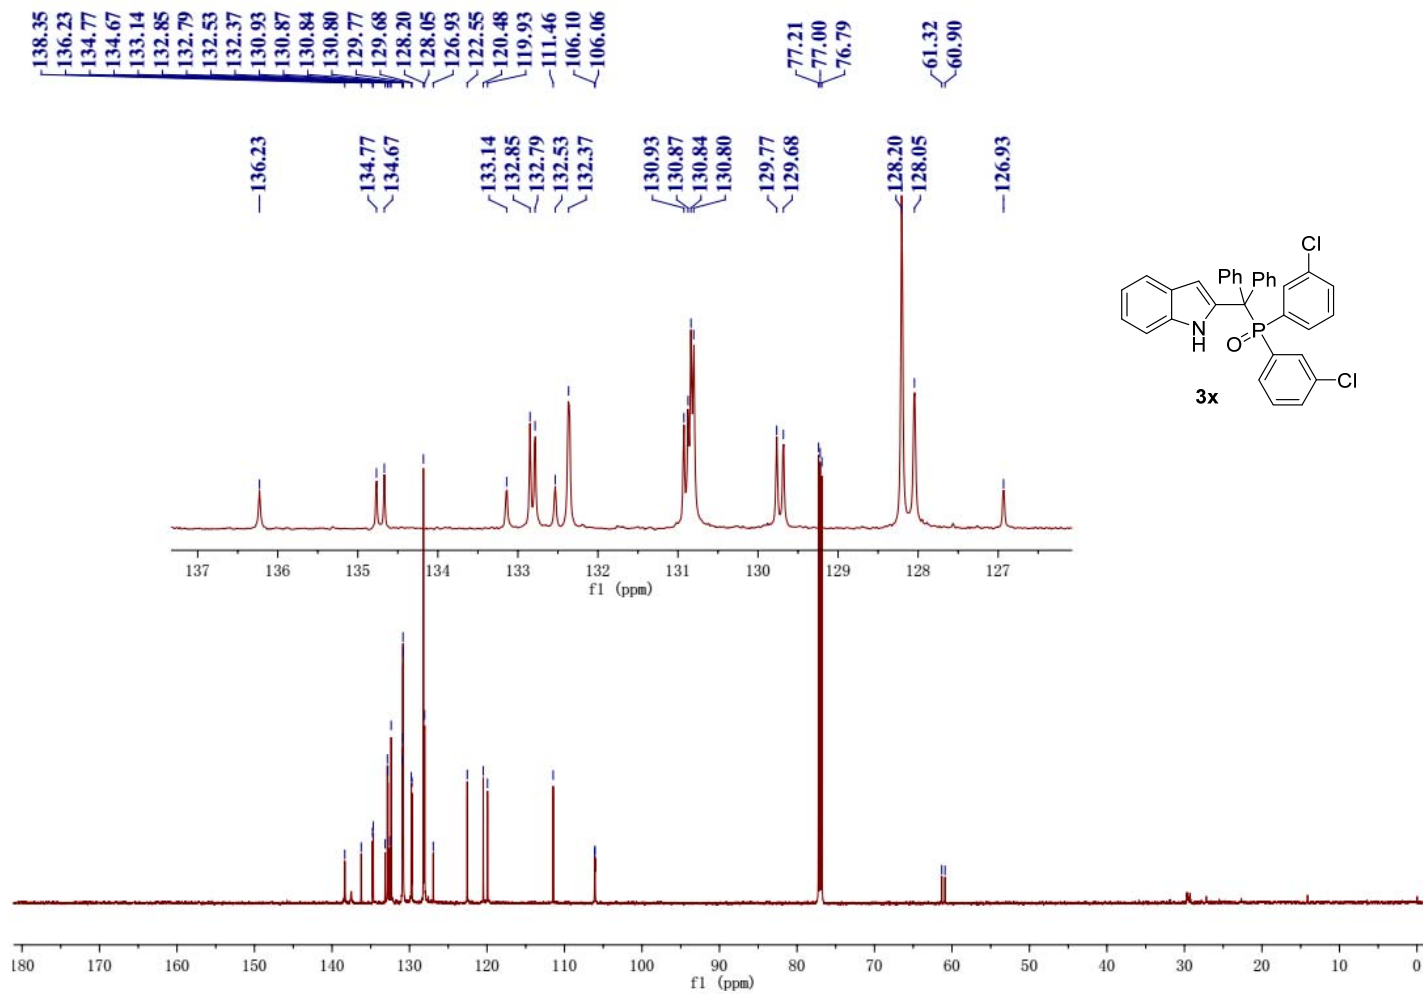



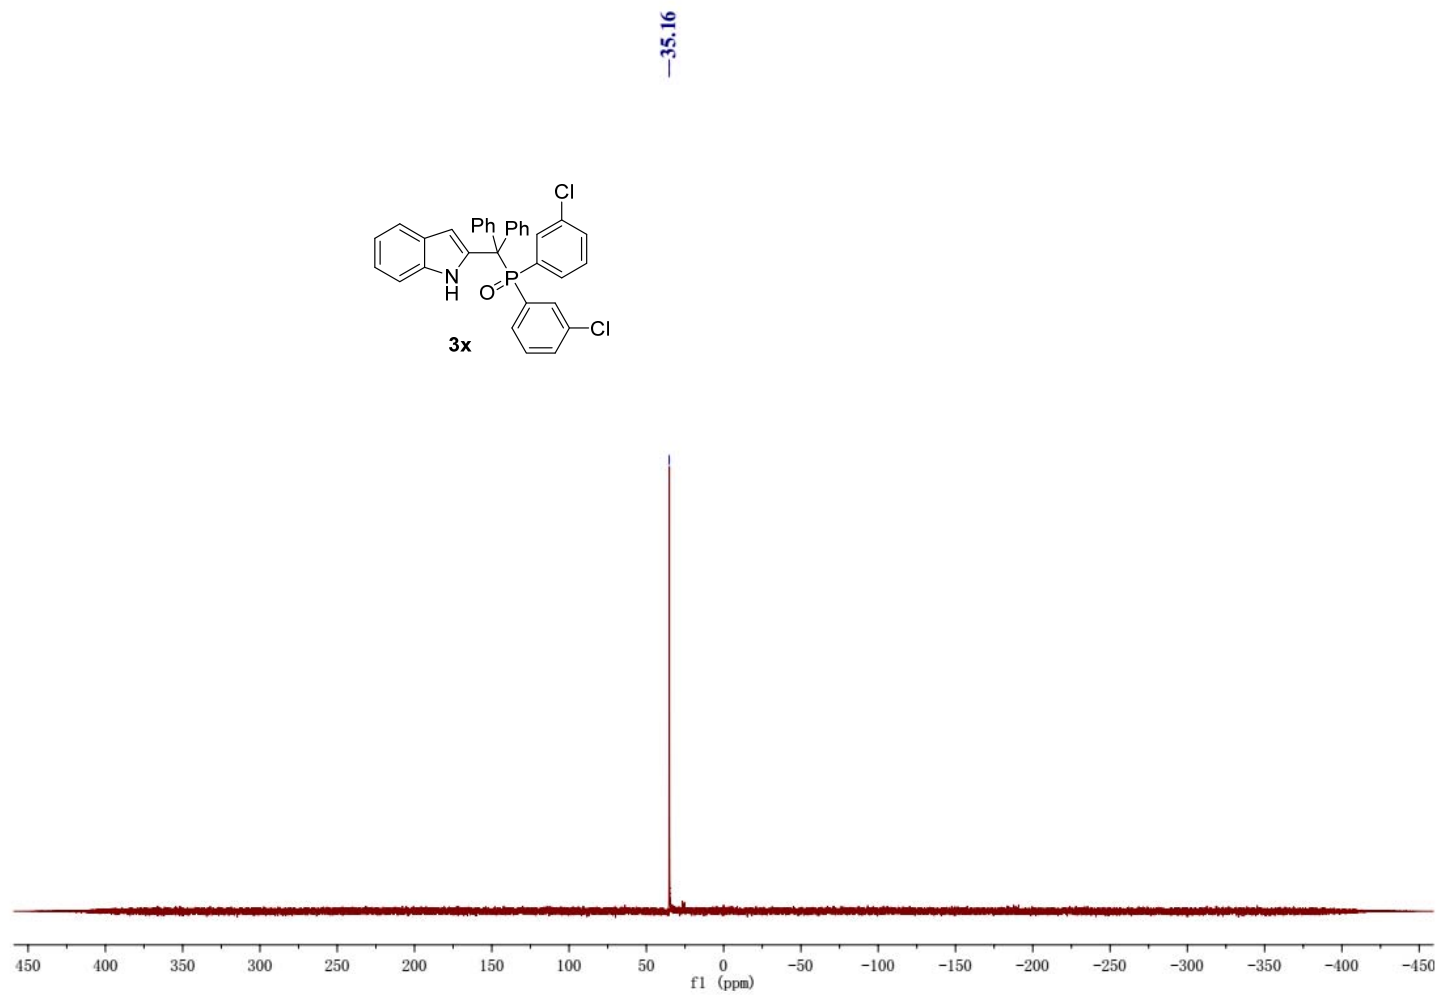

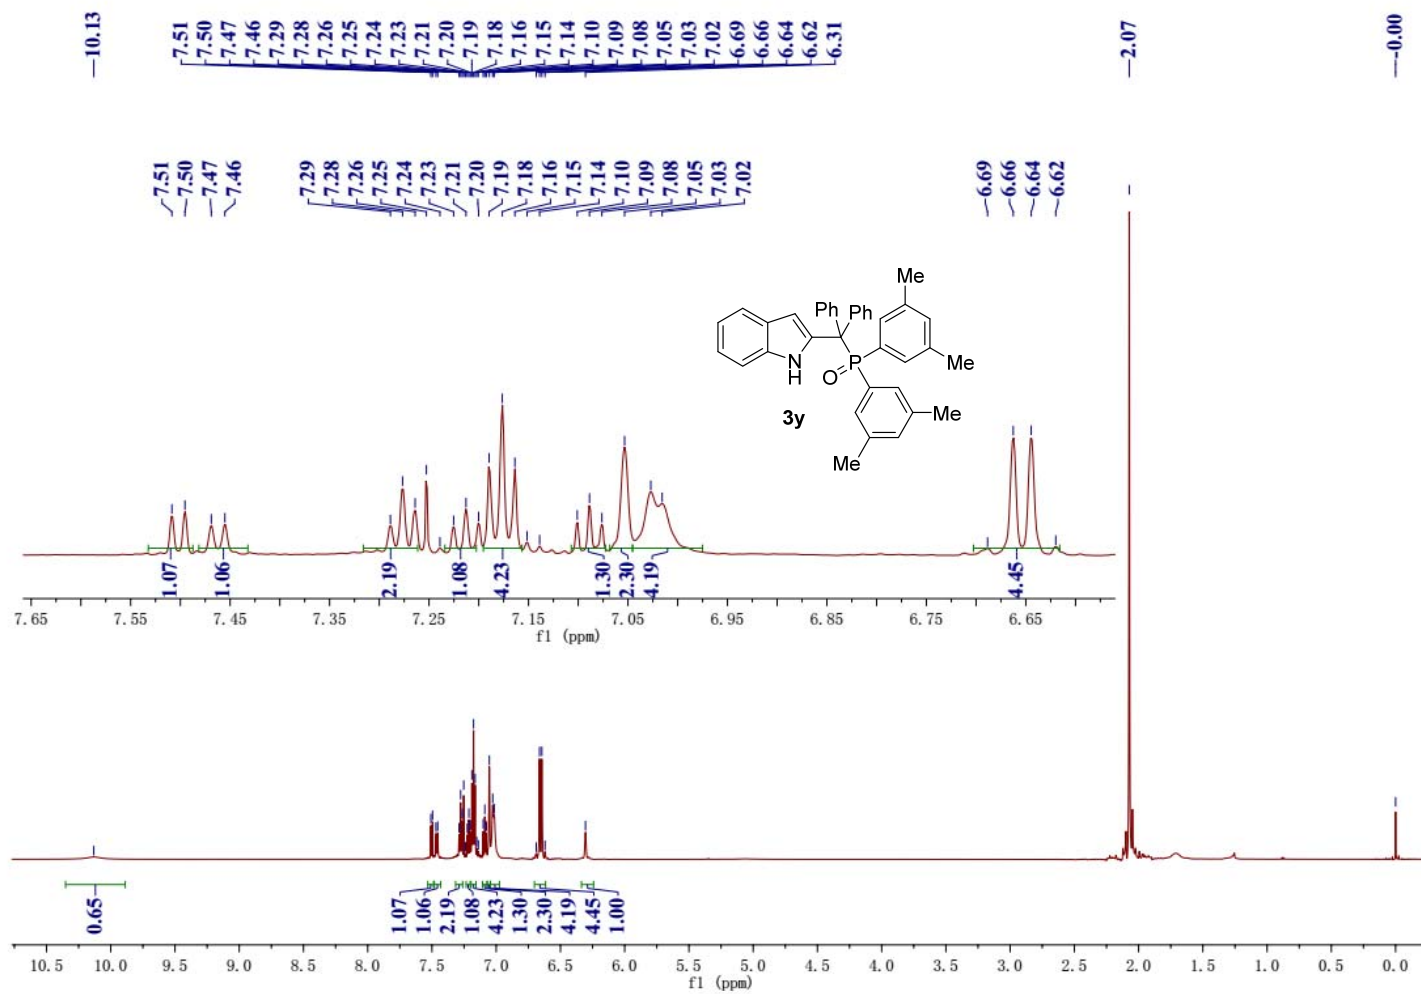

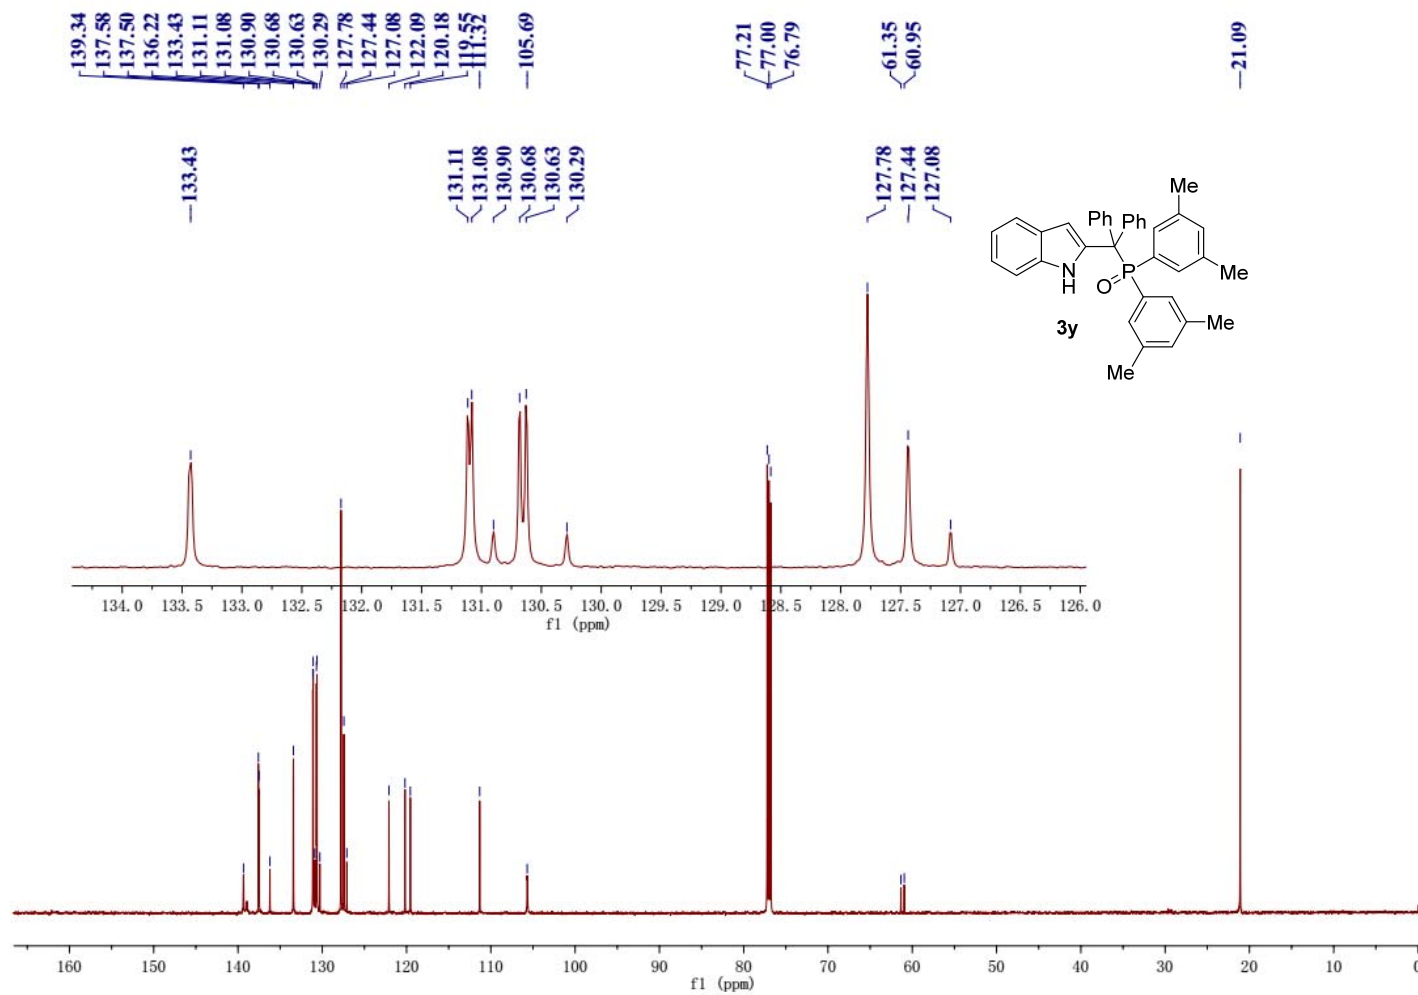

—37.97

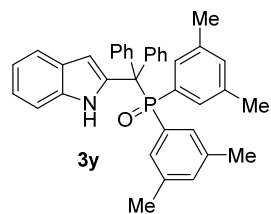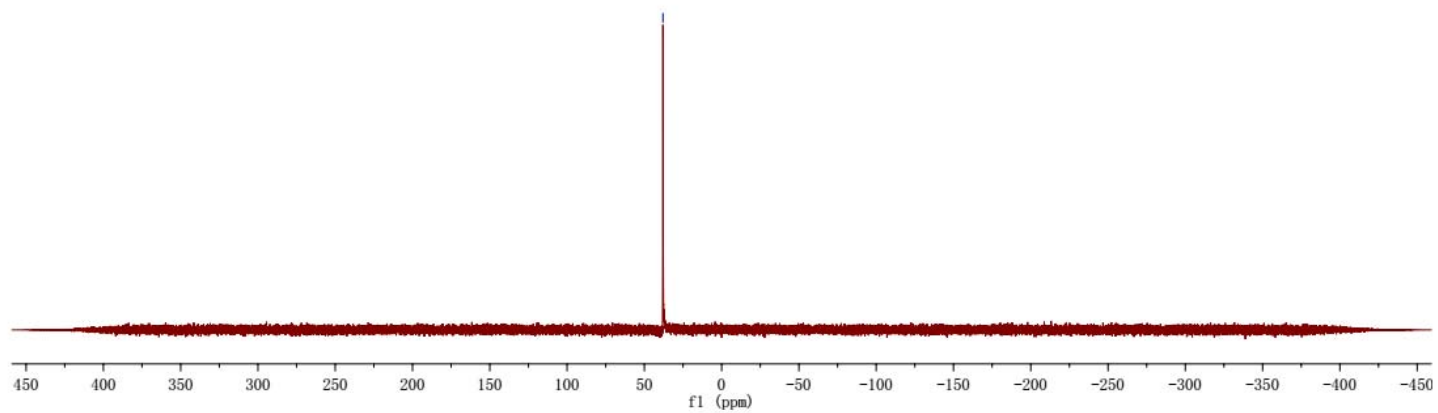

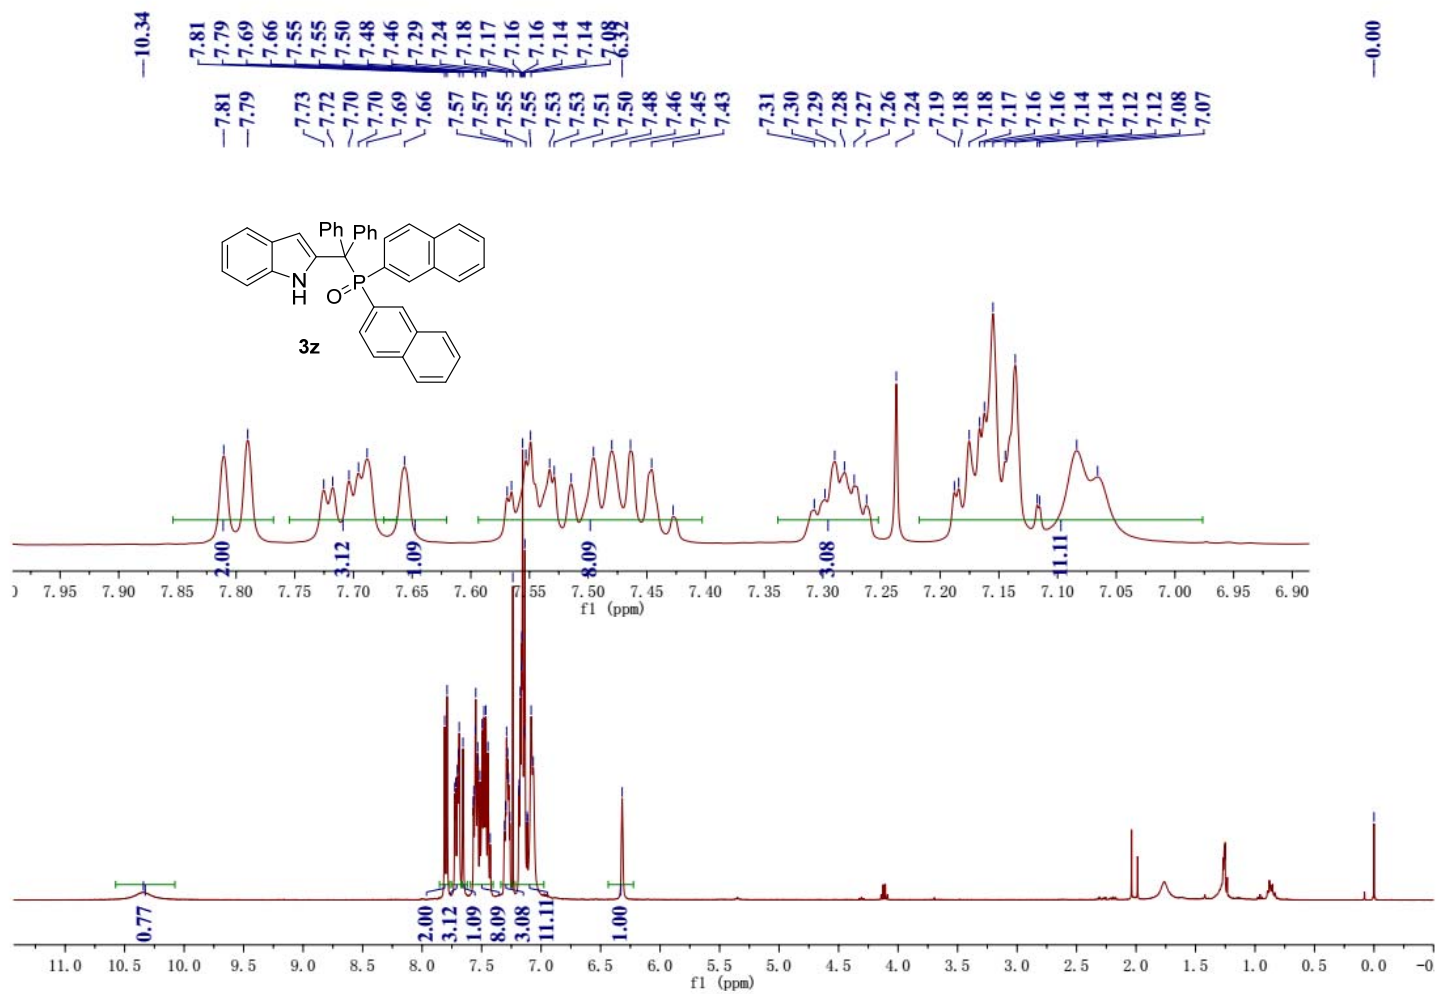

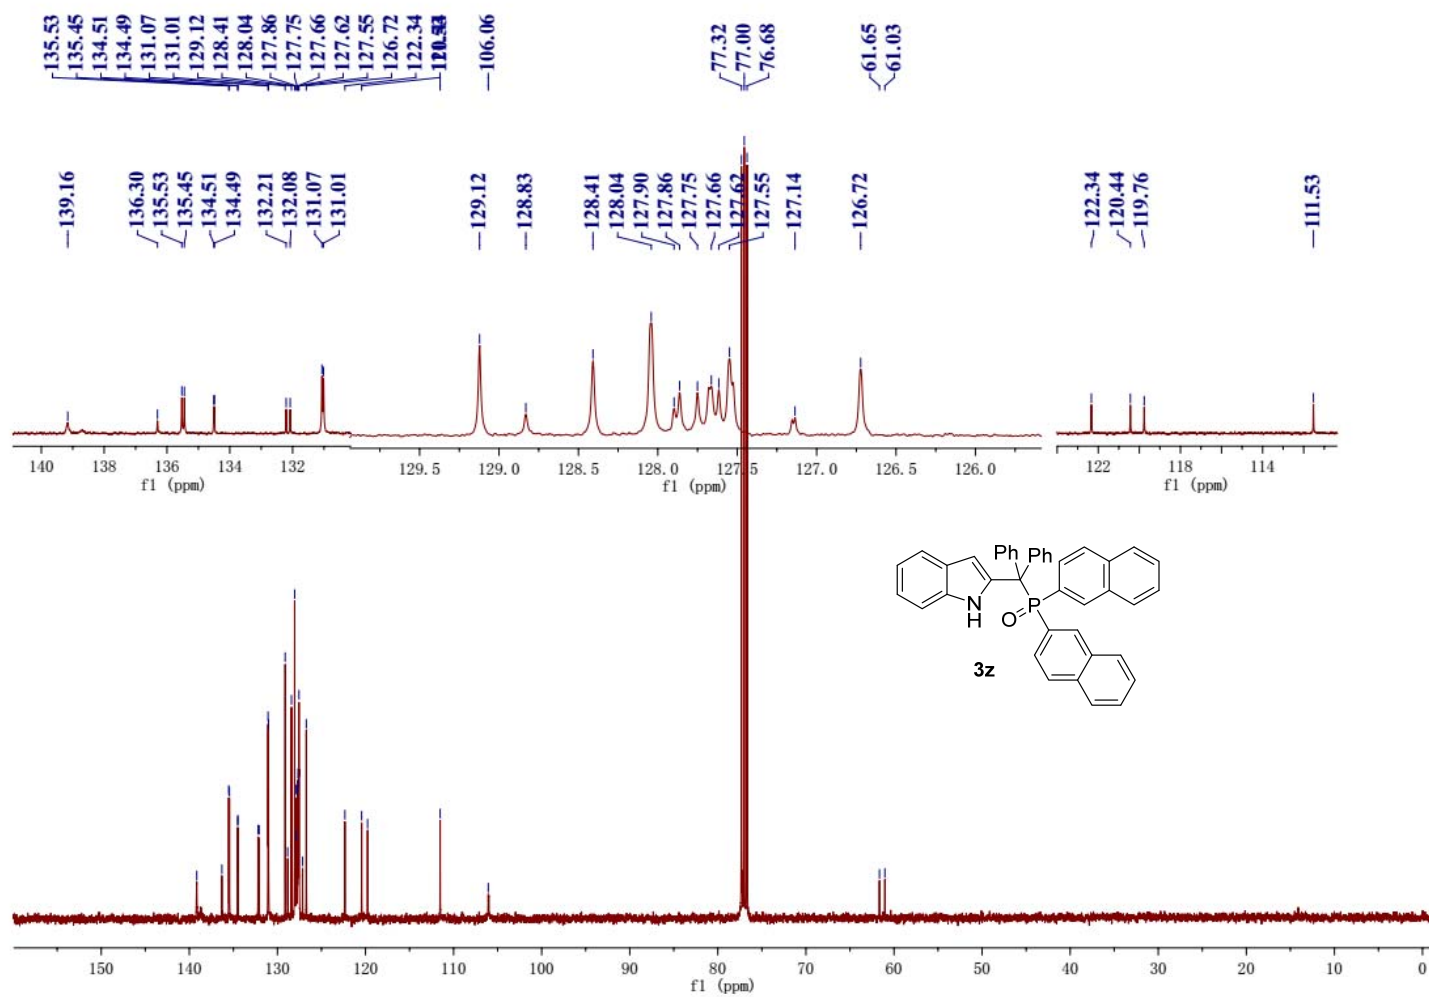

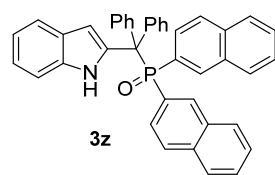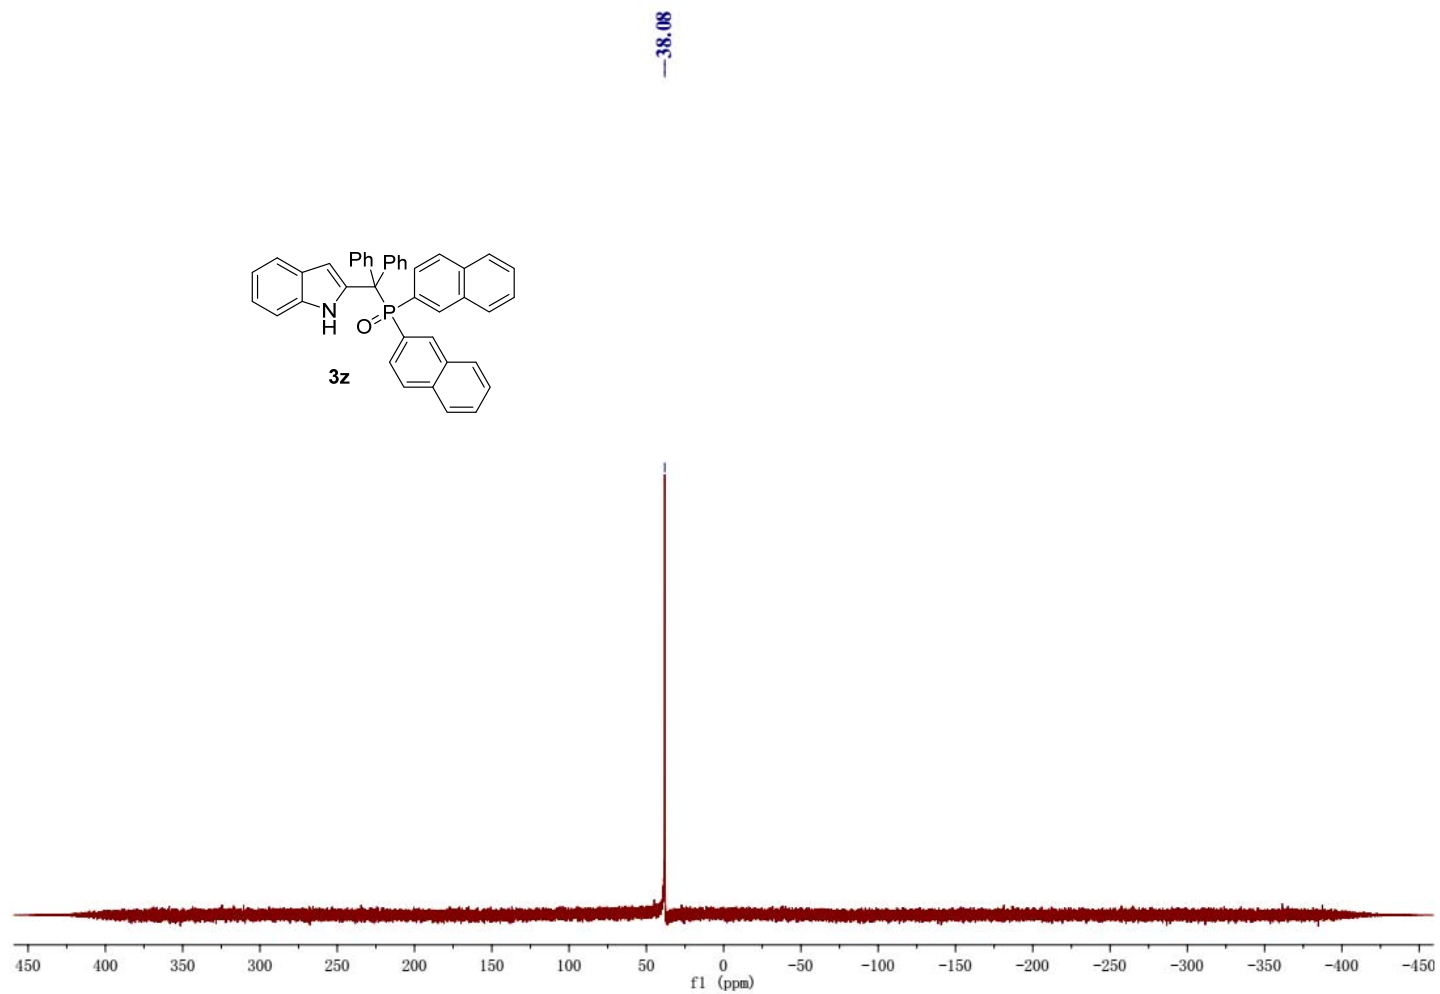

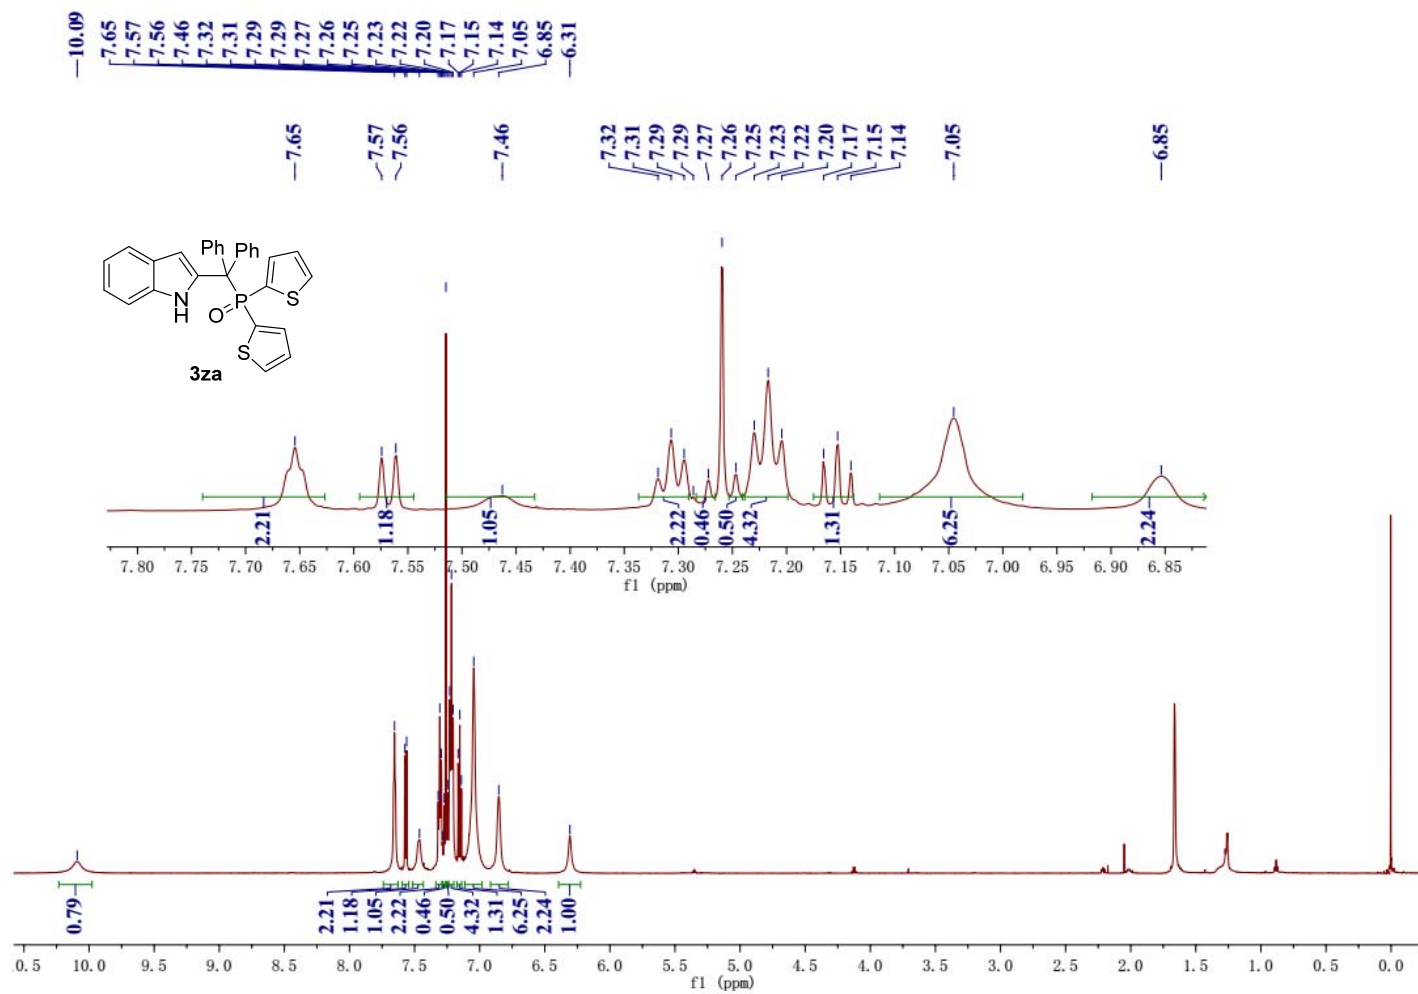



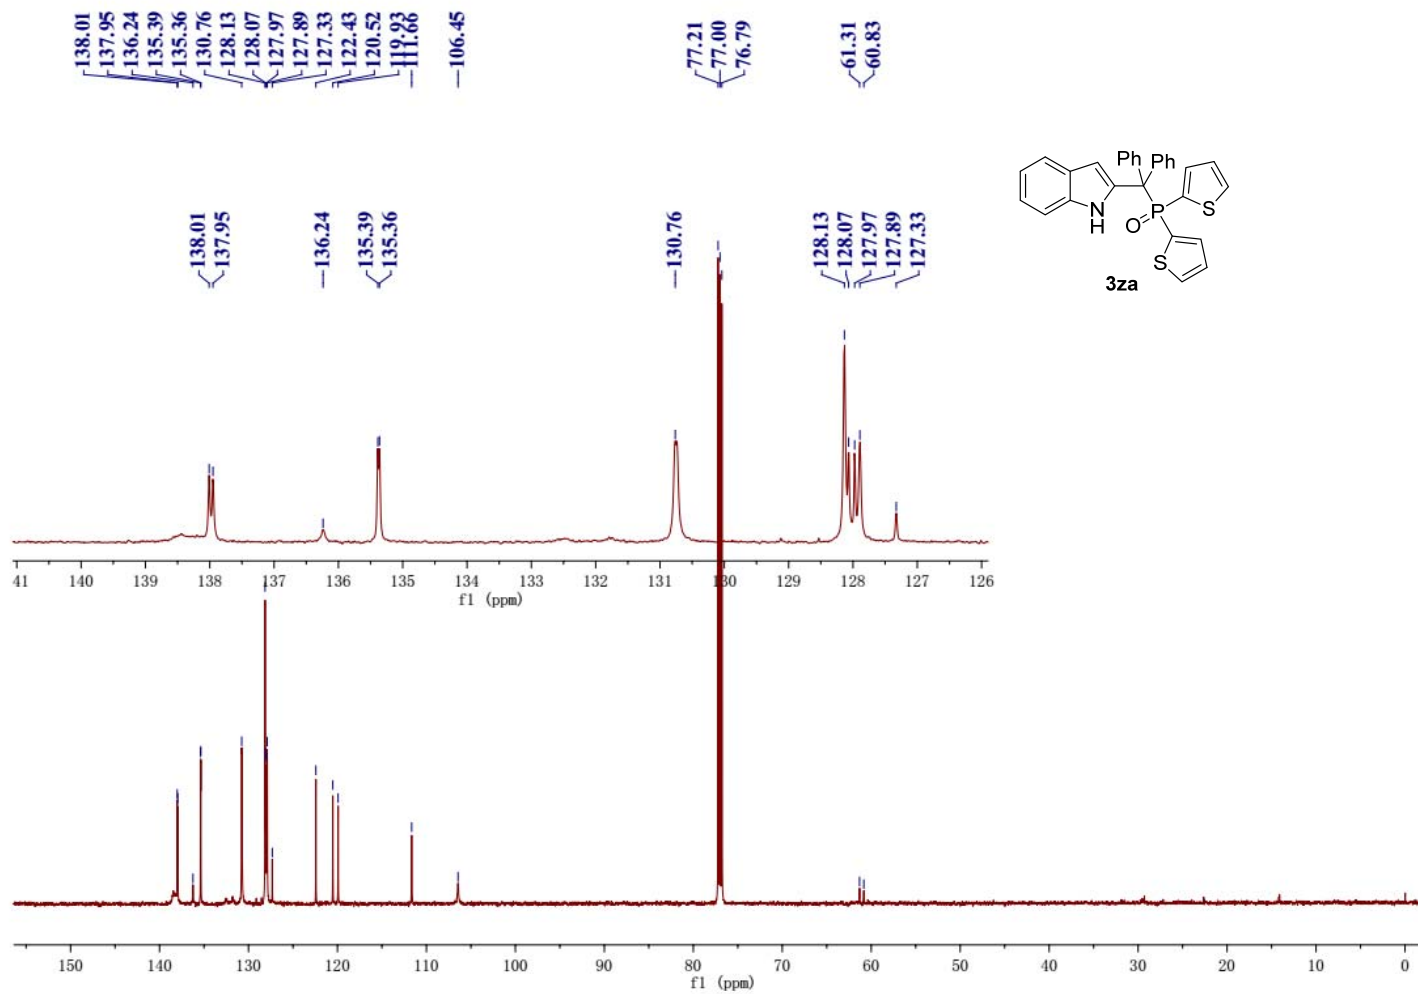

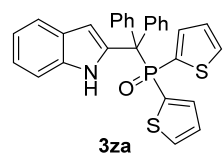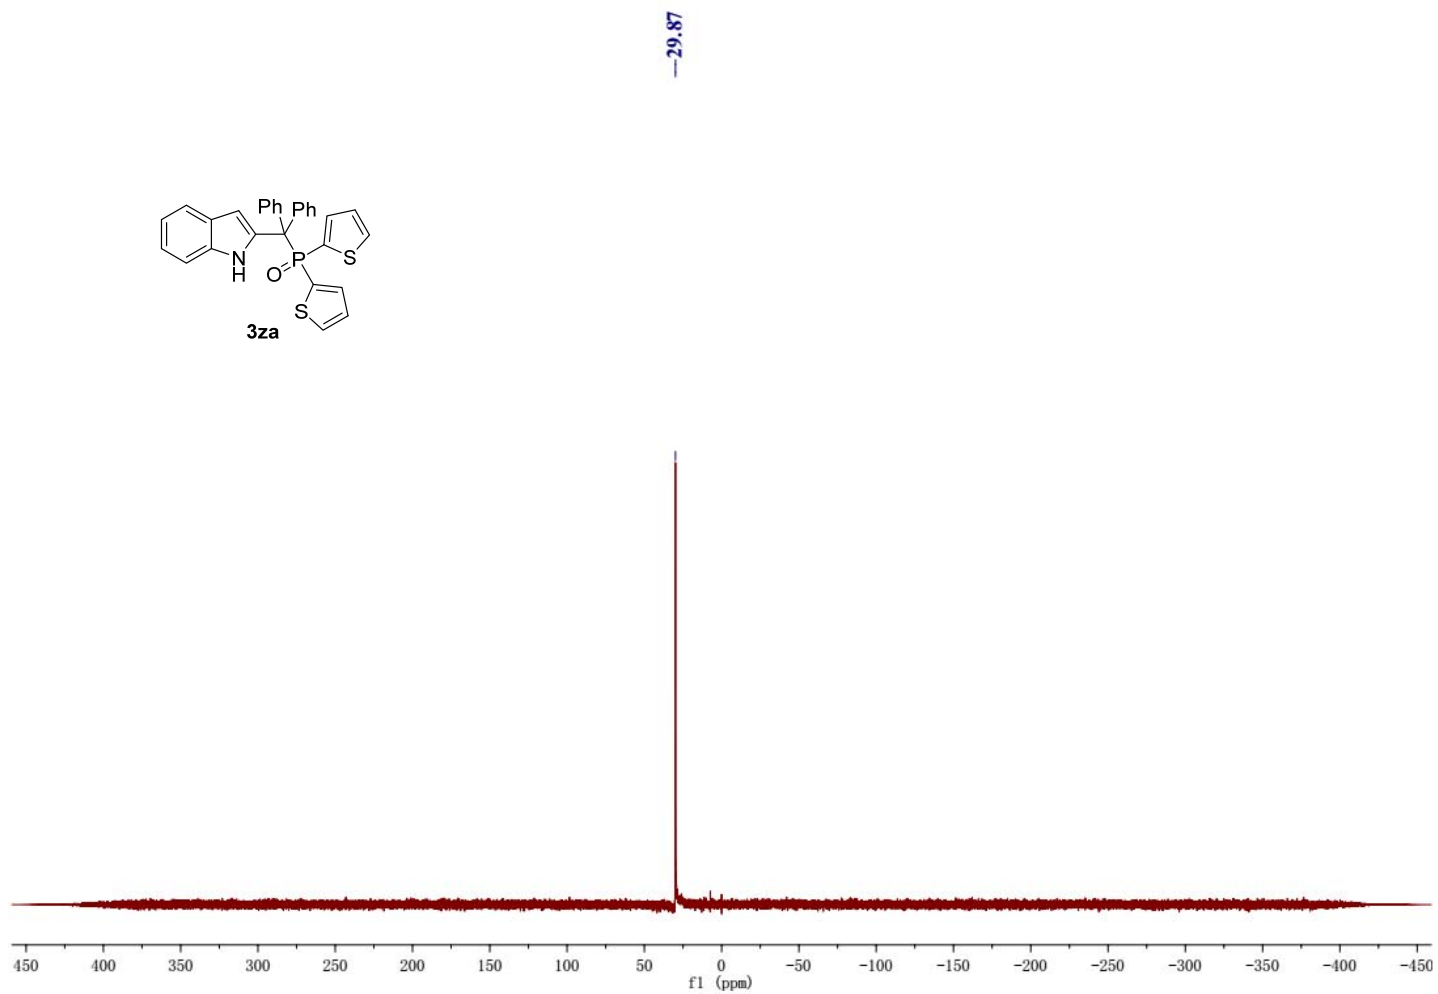

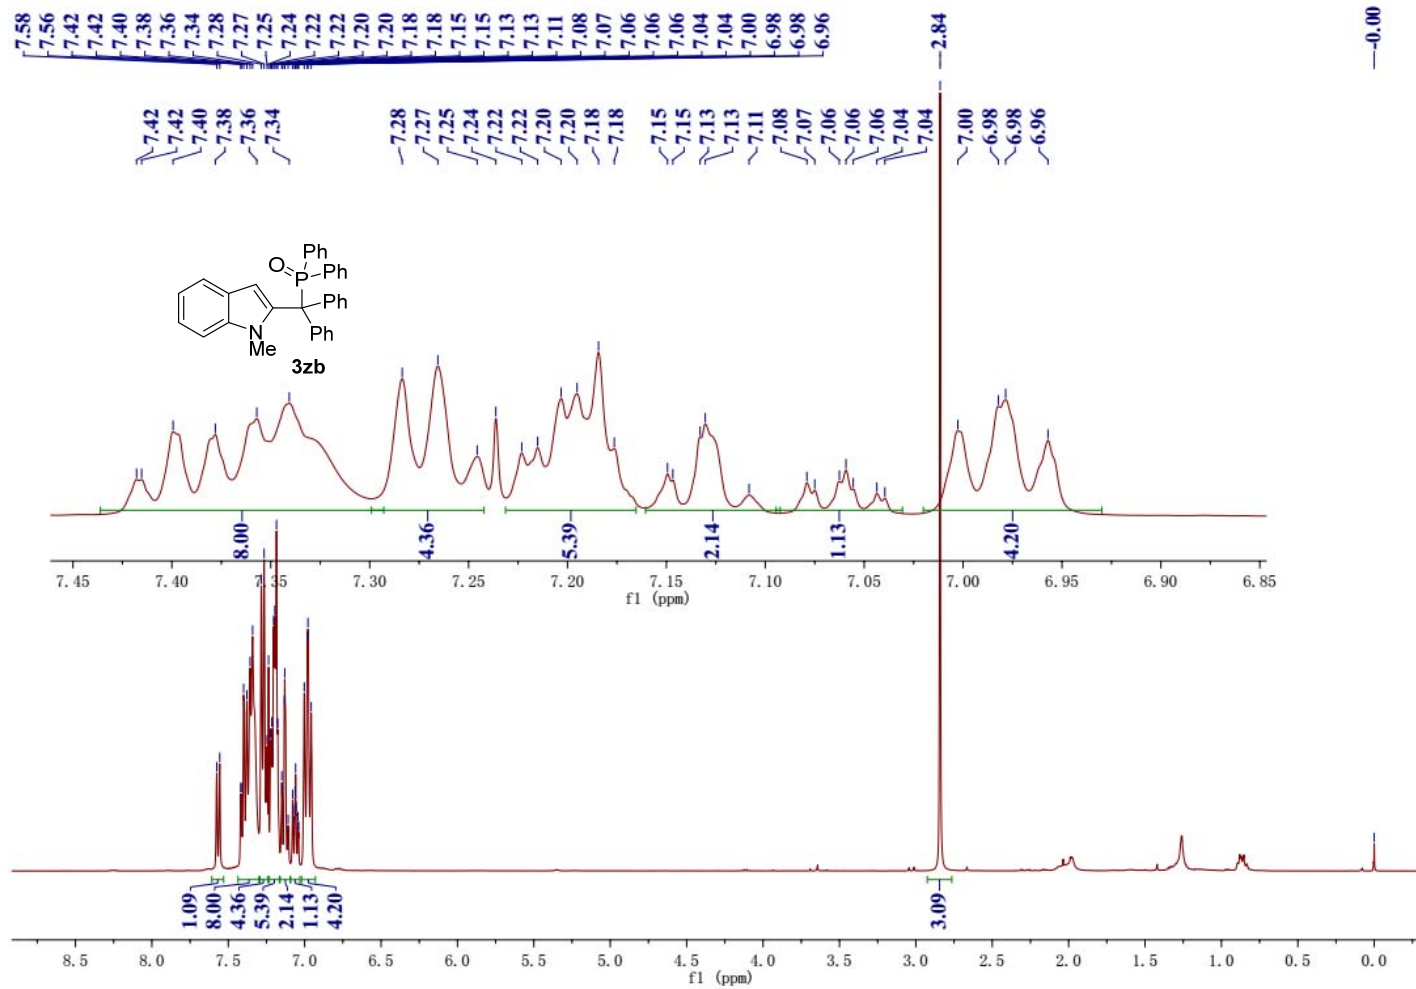

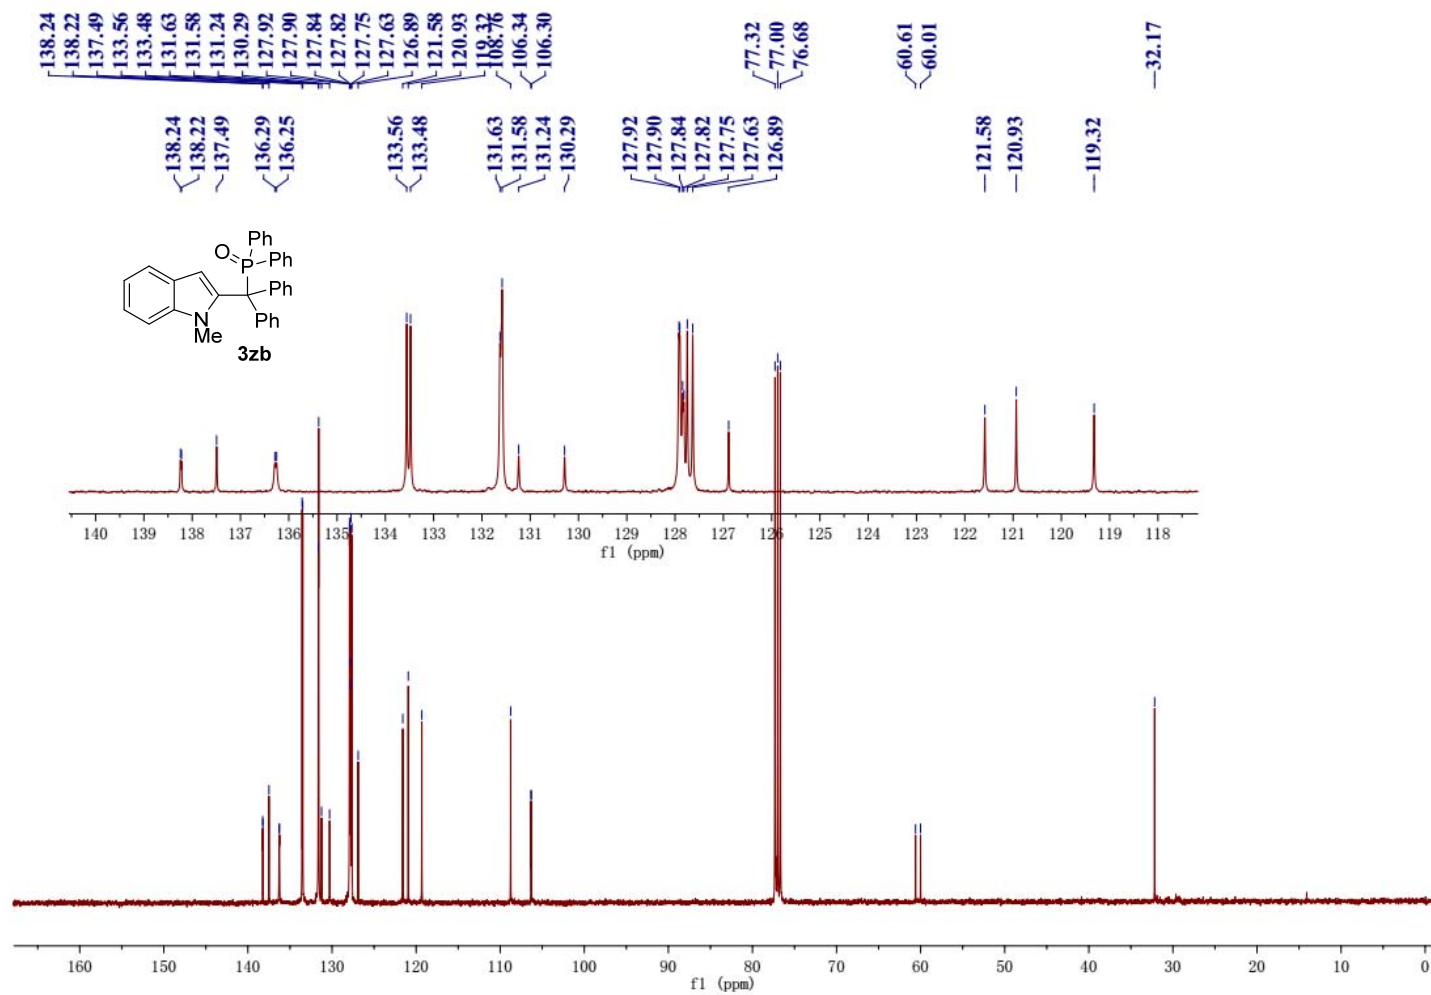

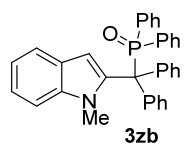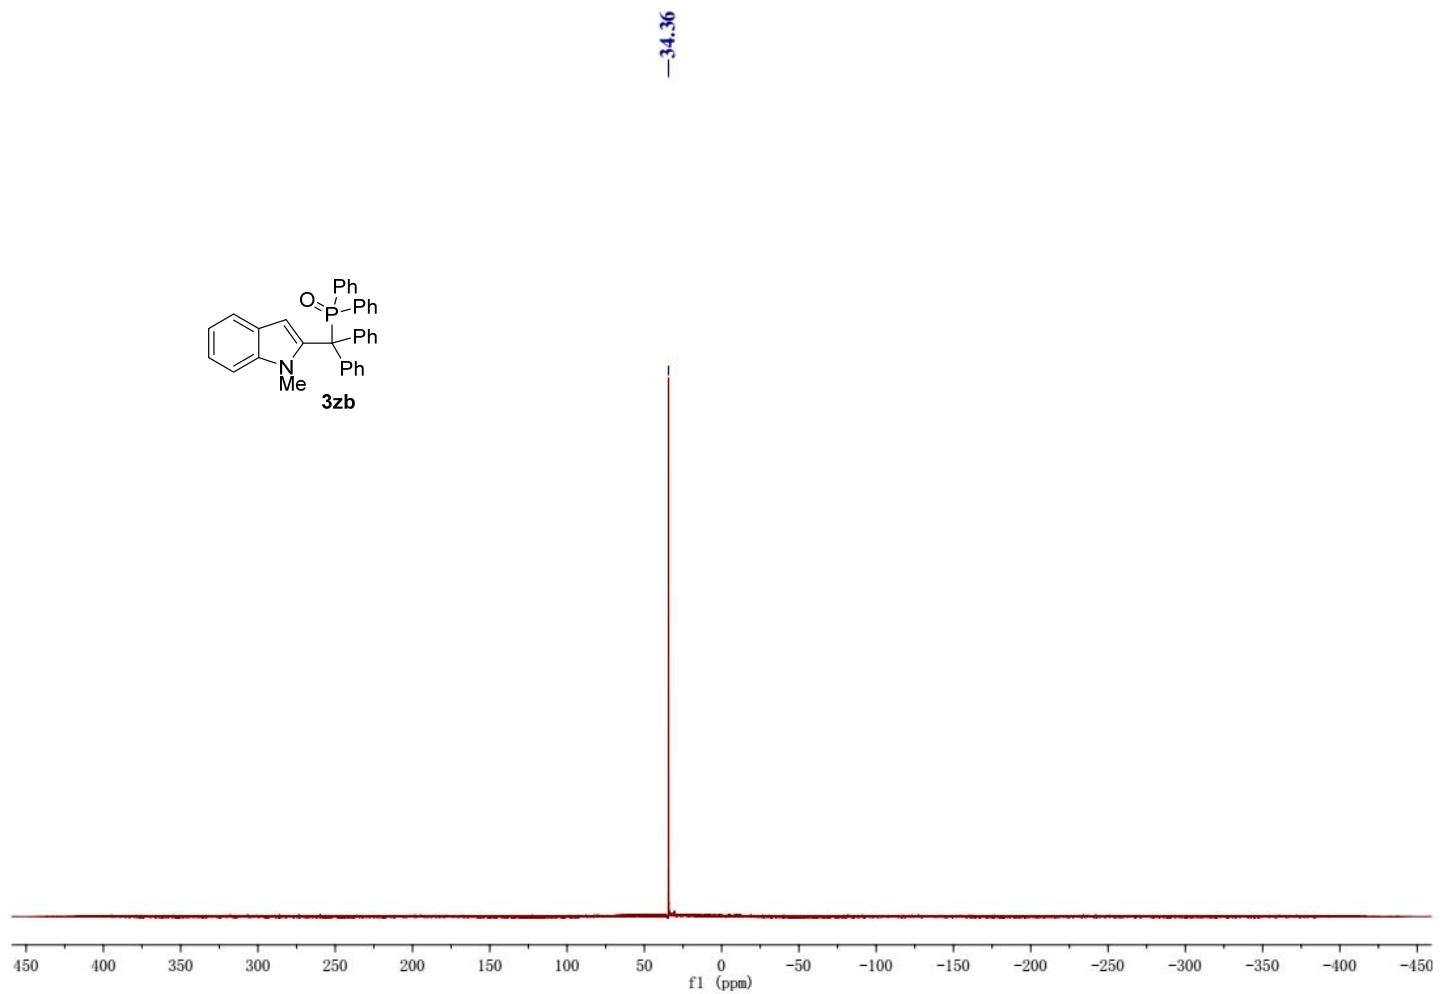

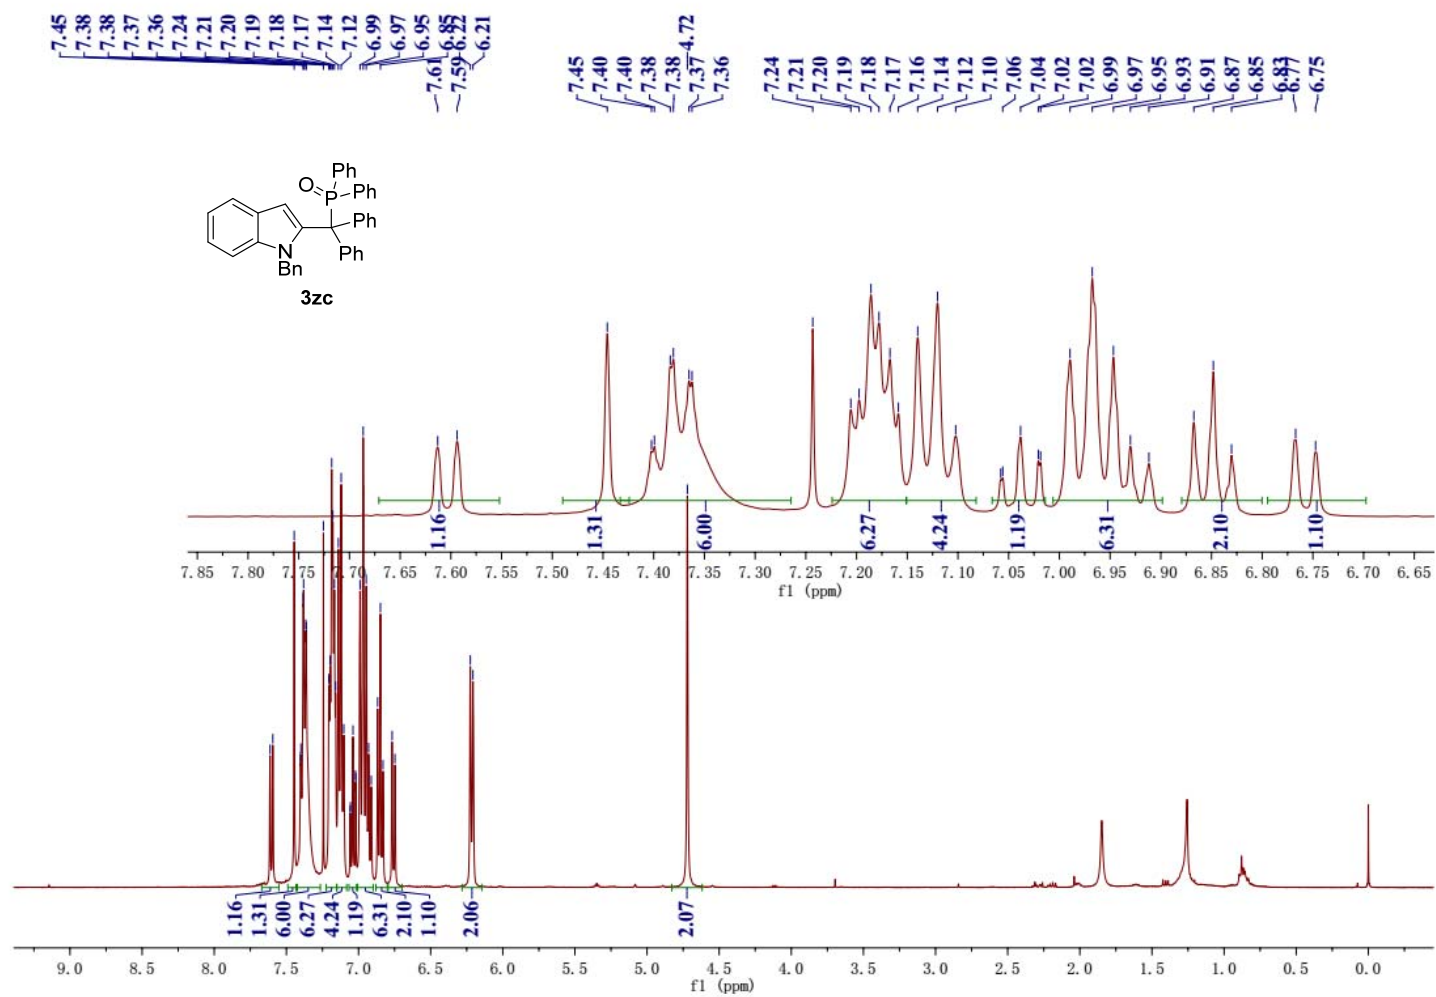

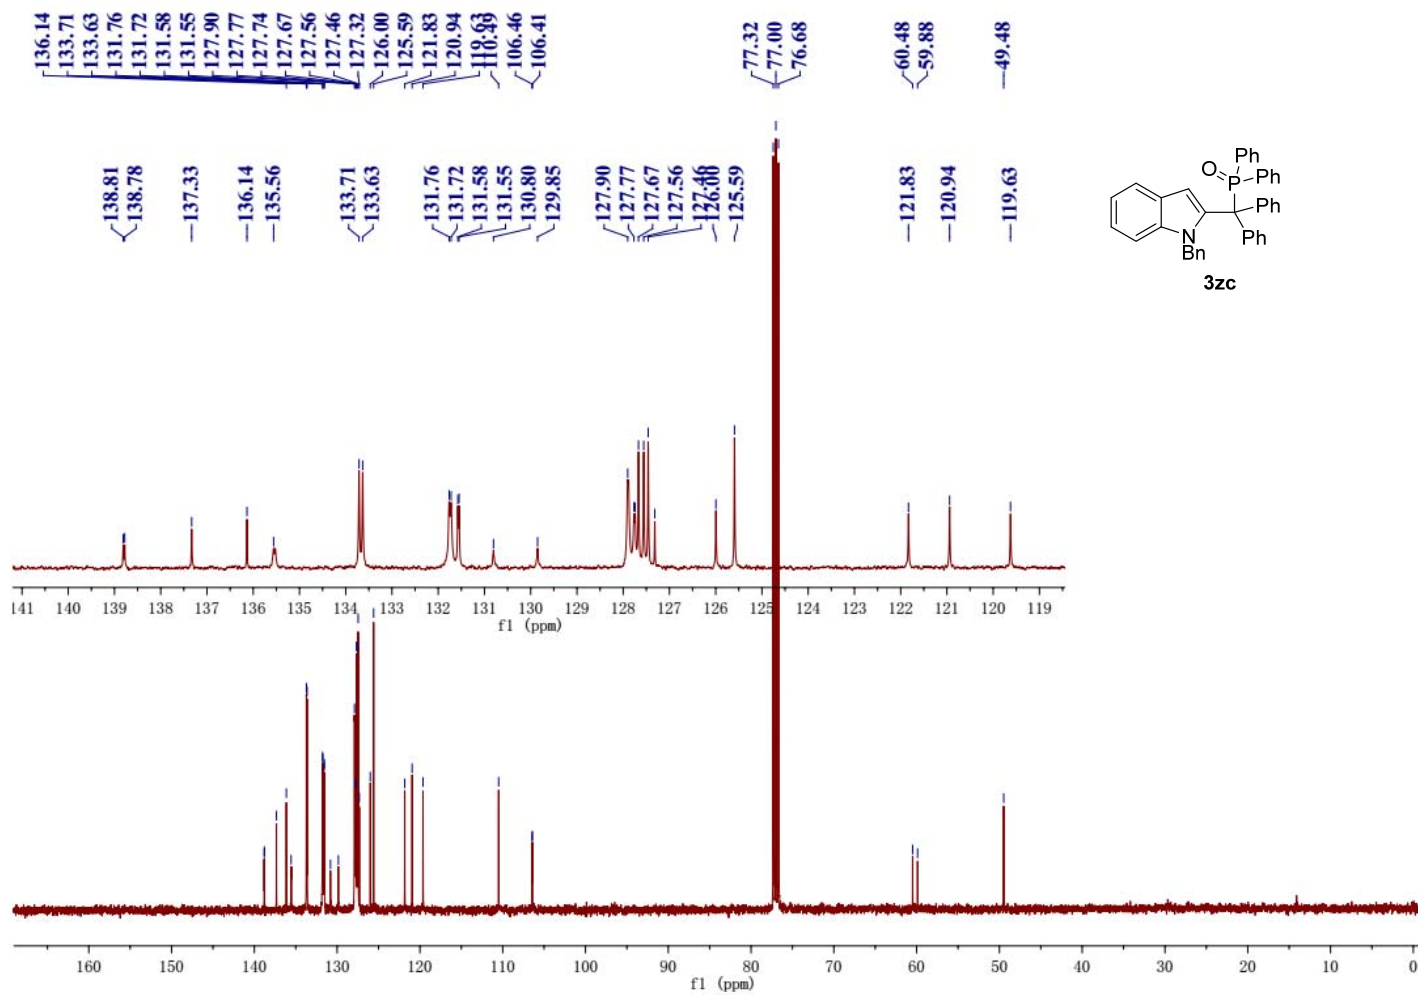

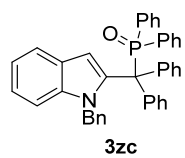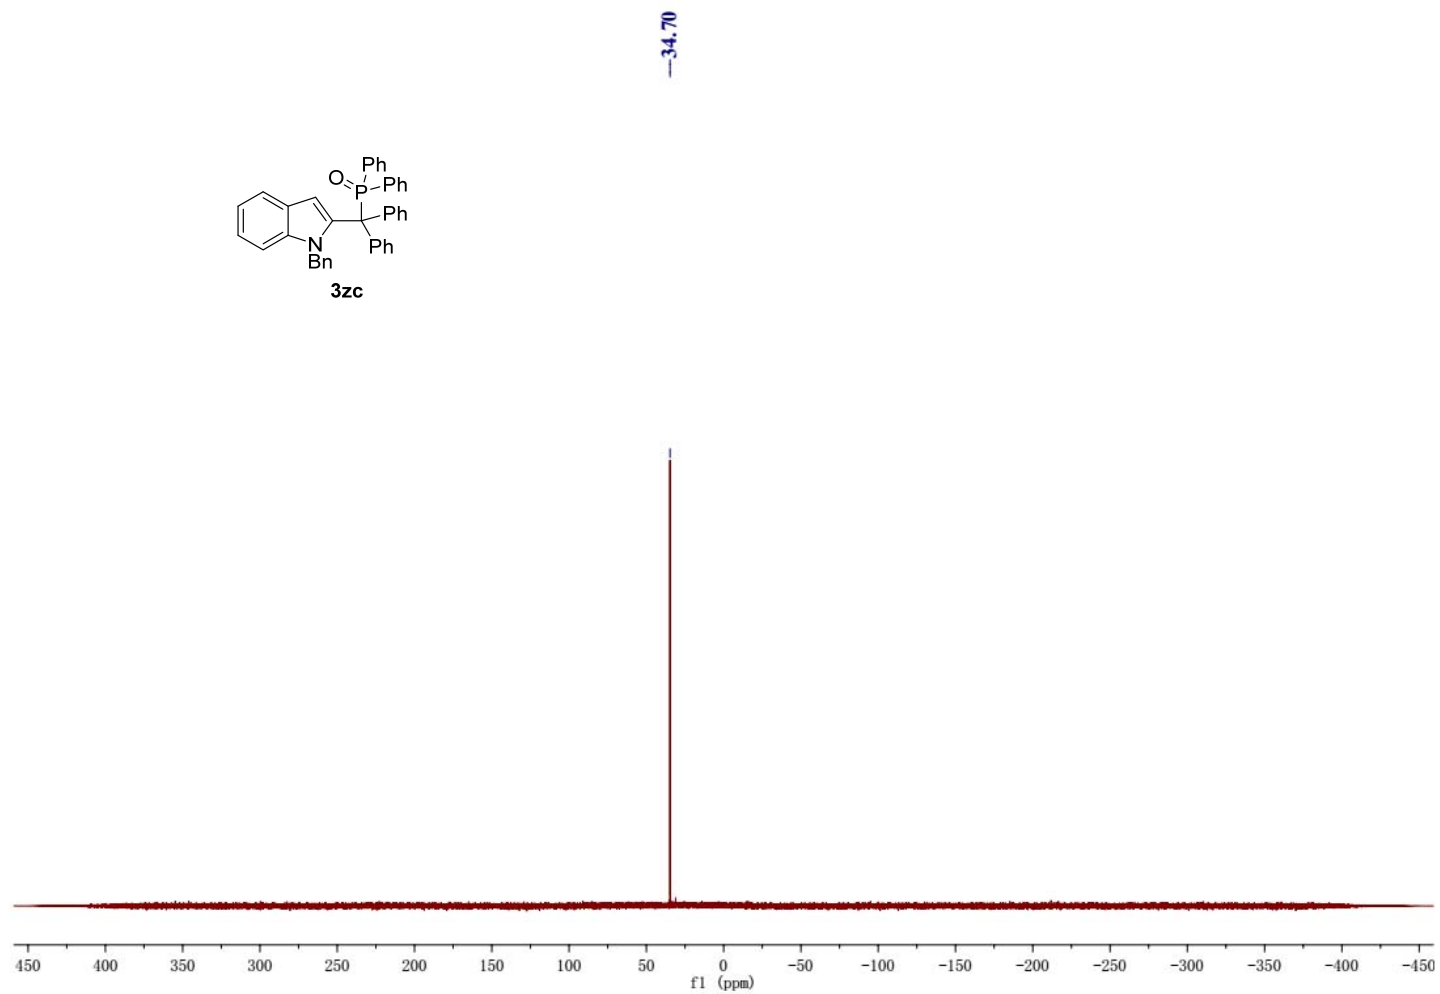



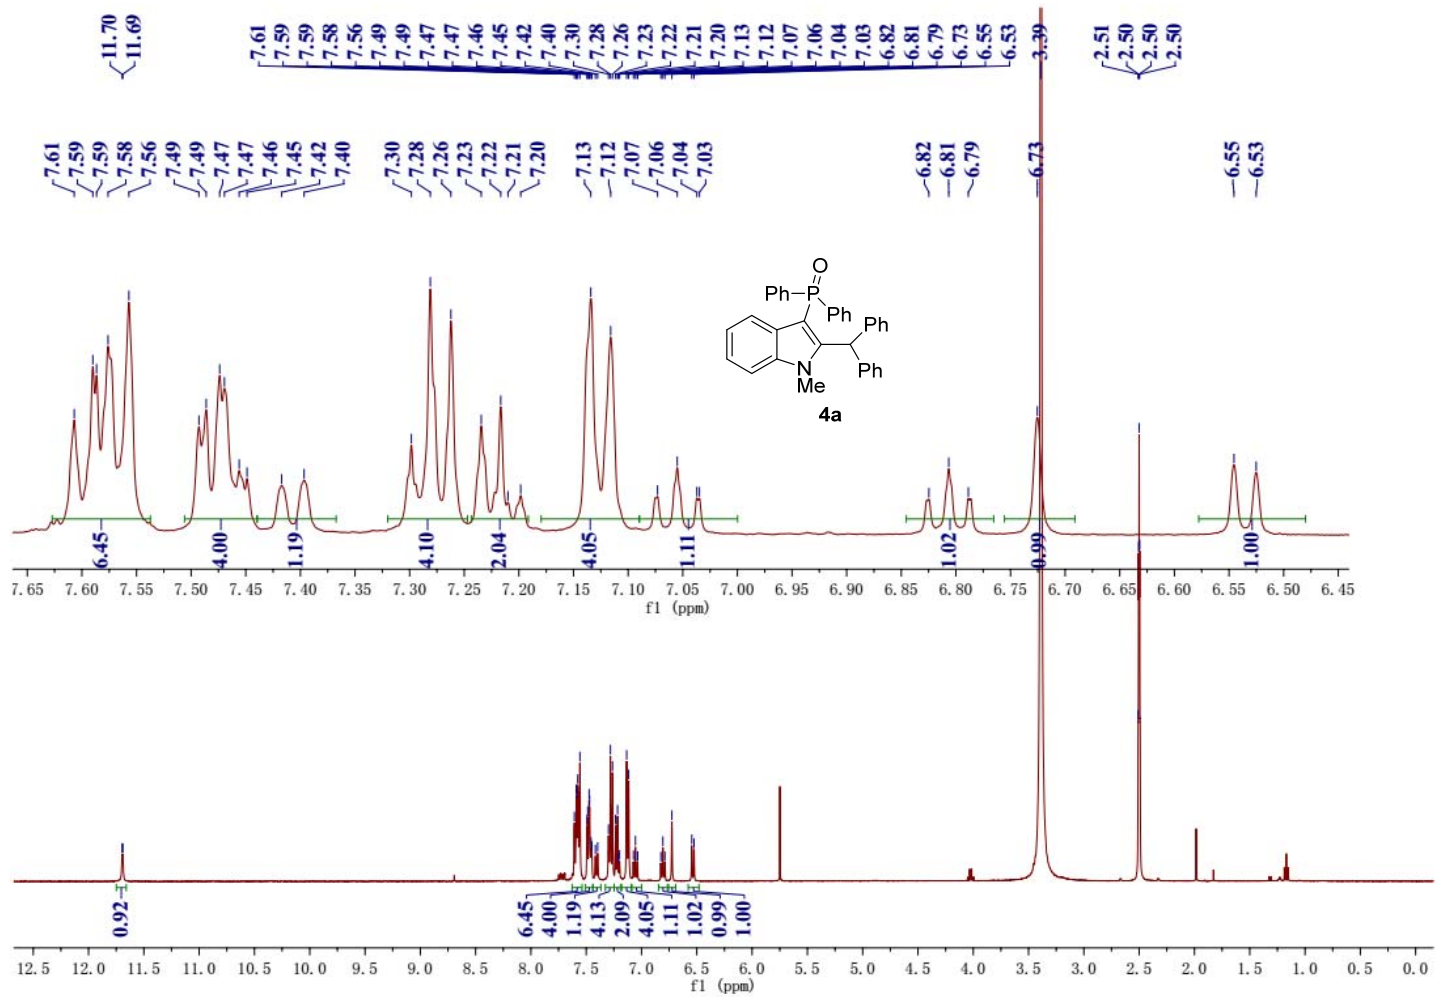

-22.12

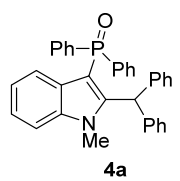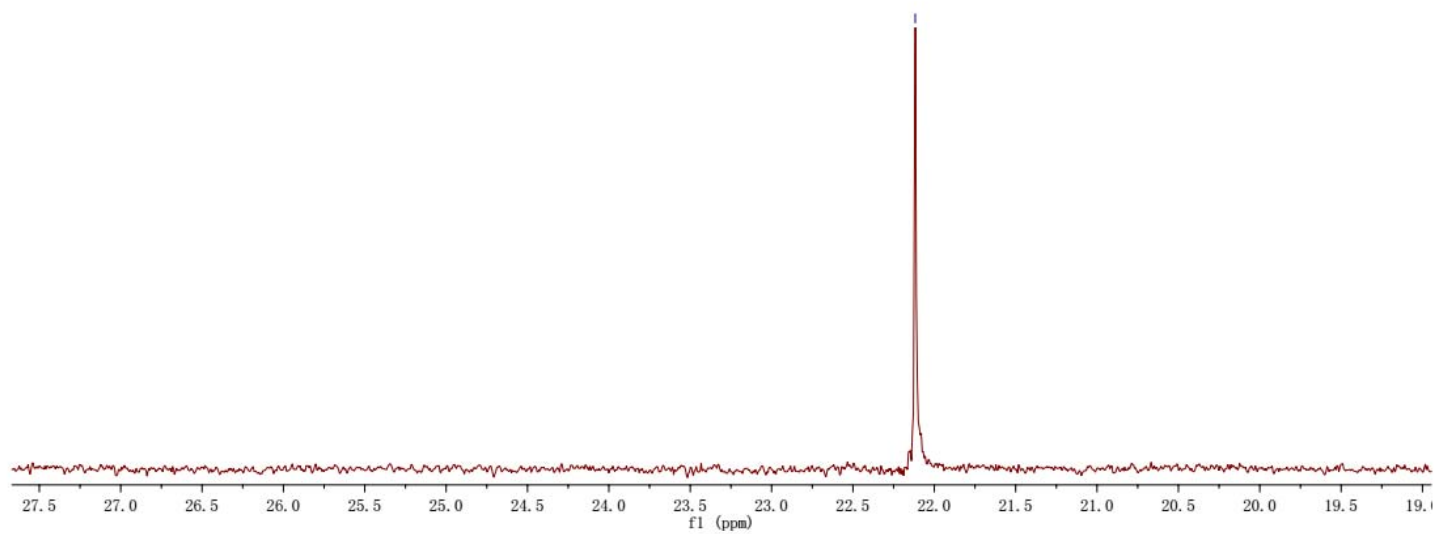

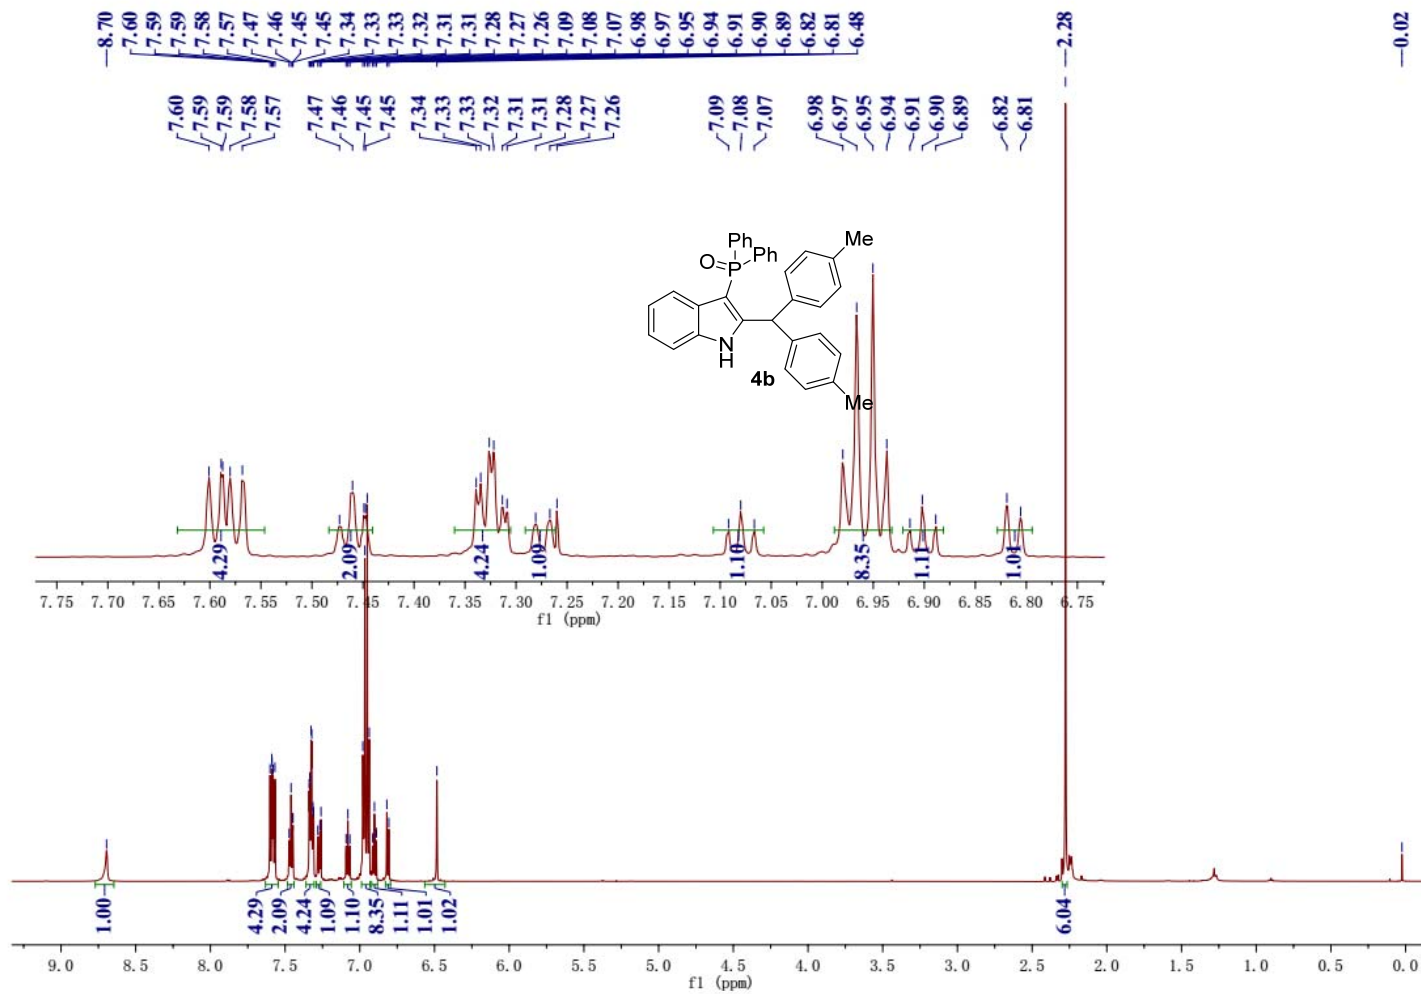

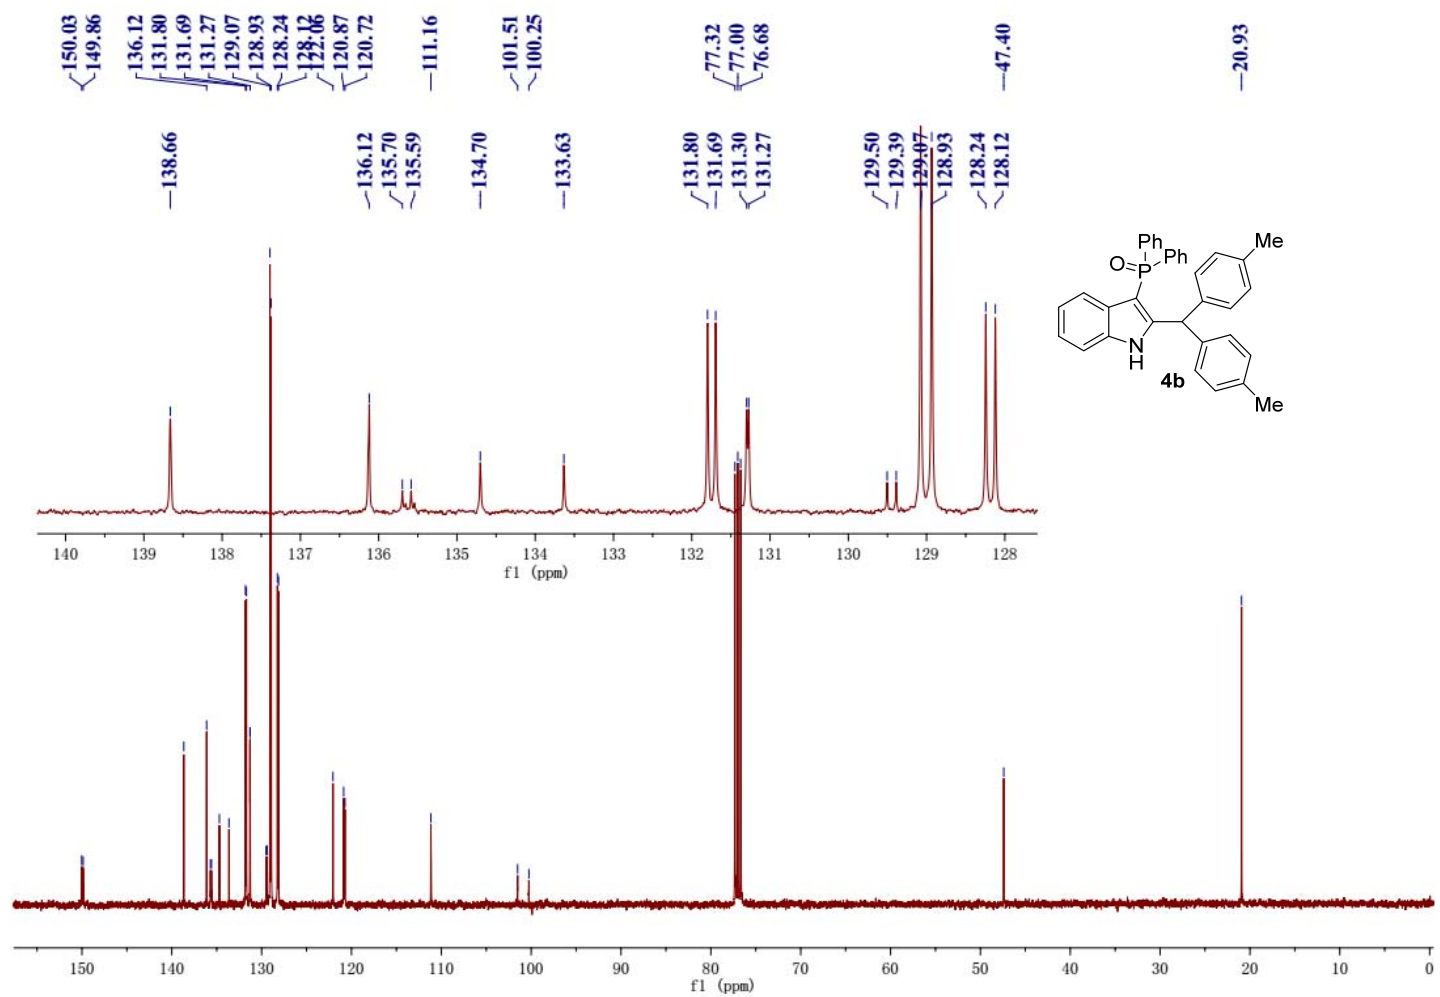

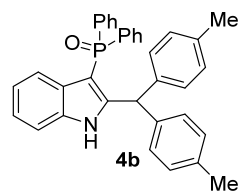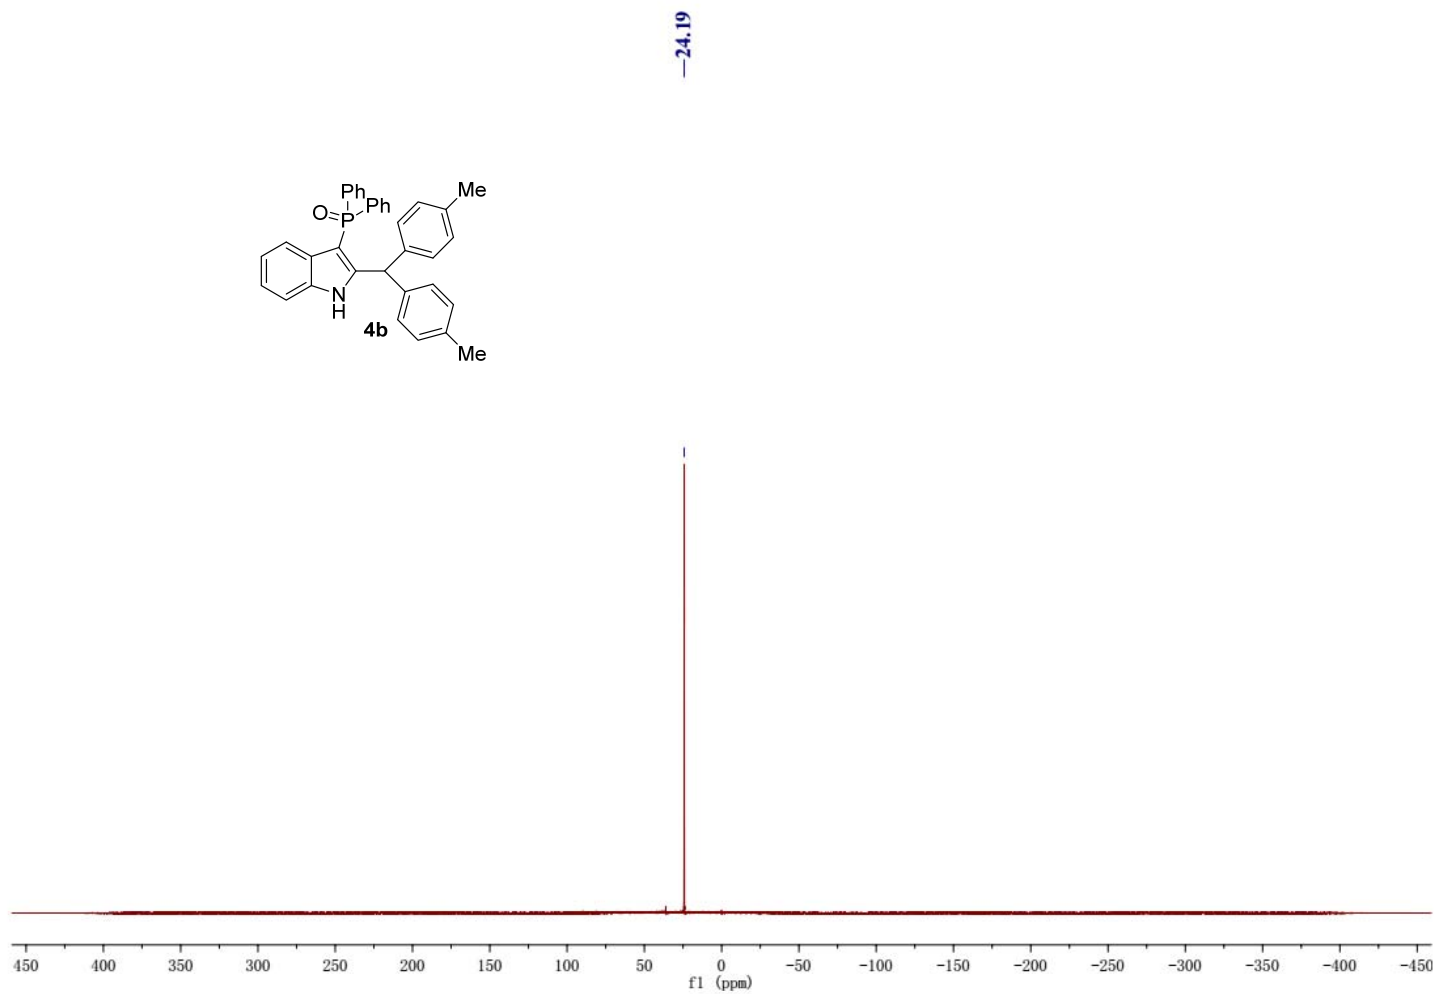

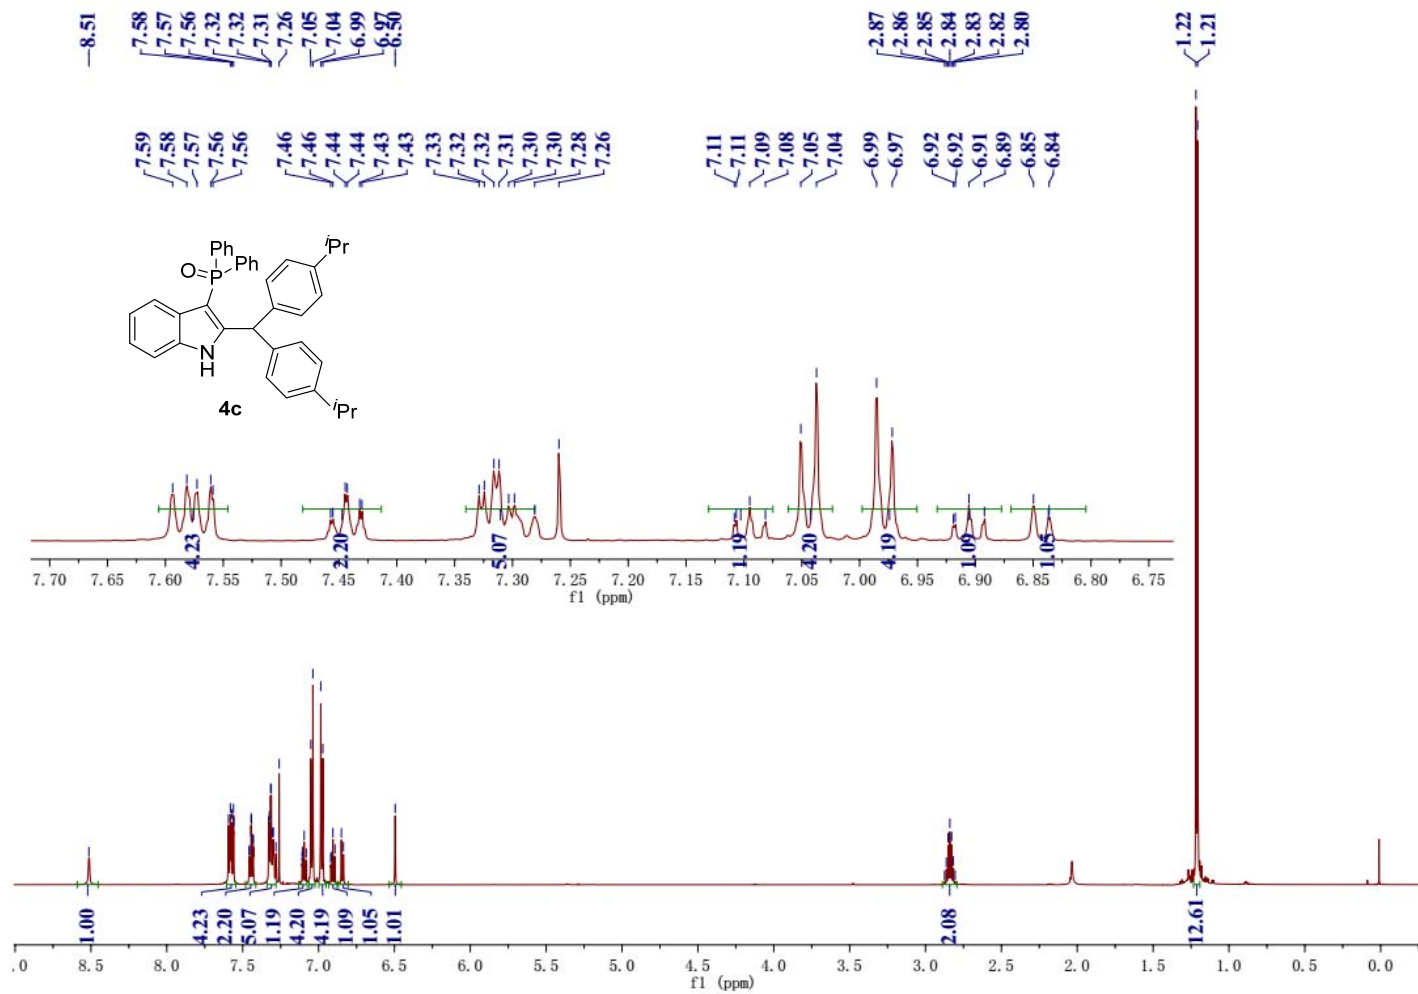

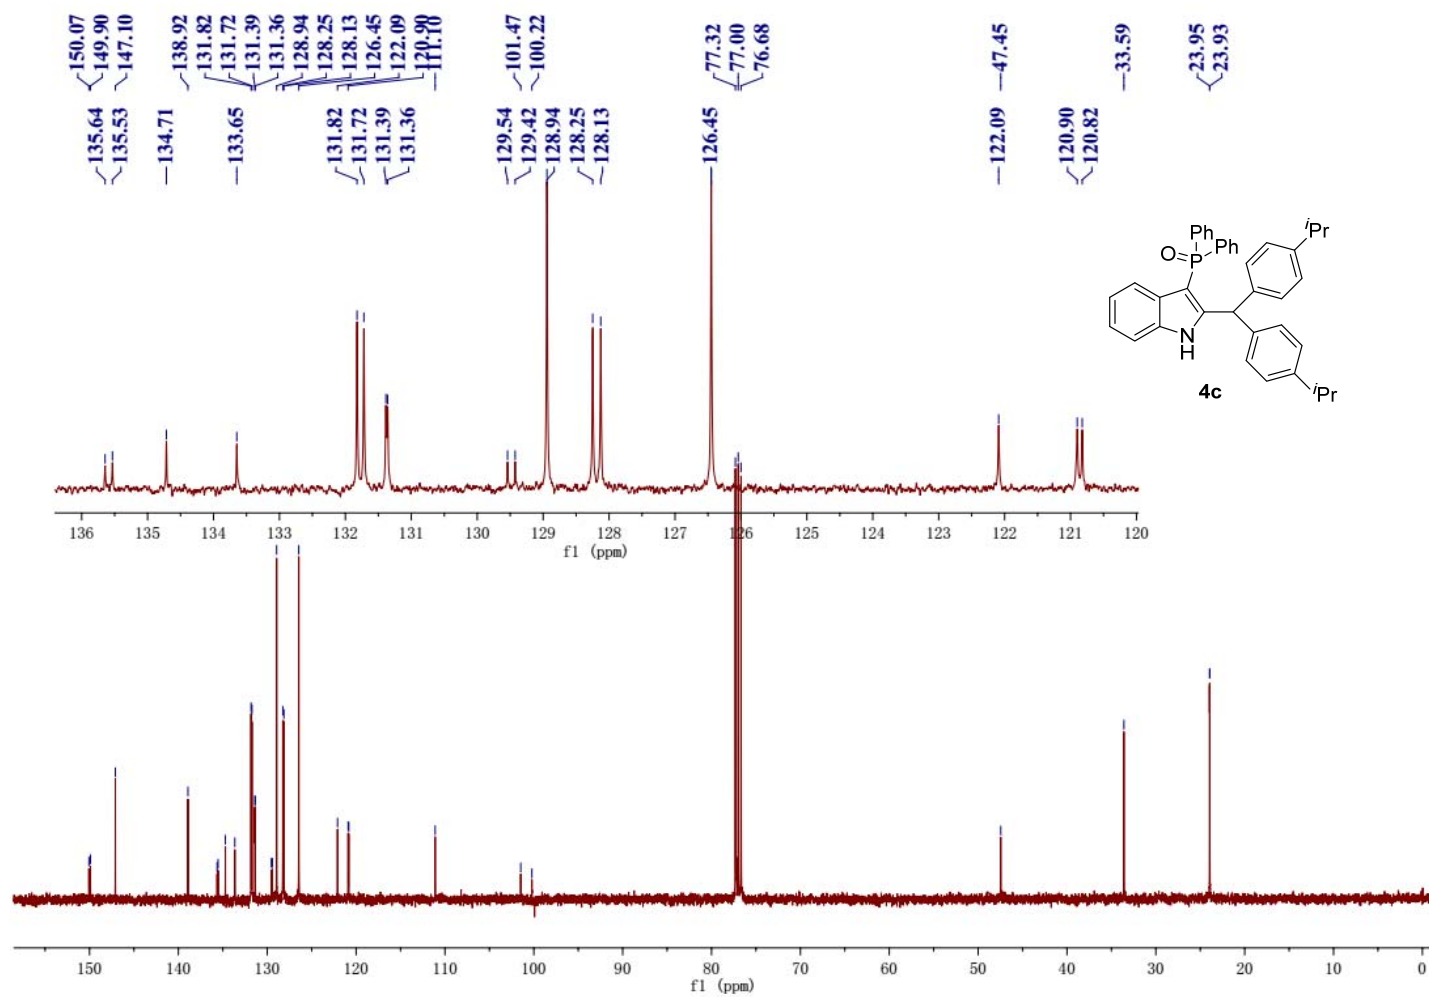

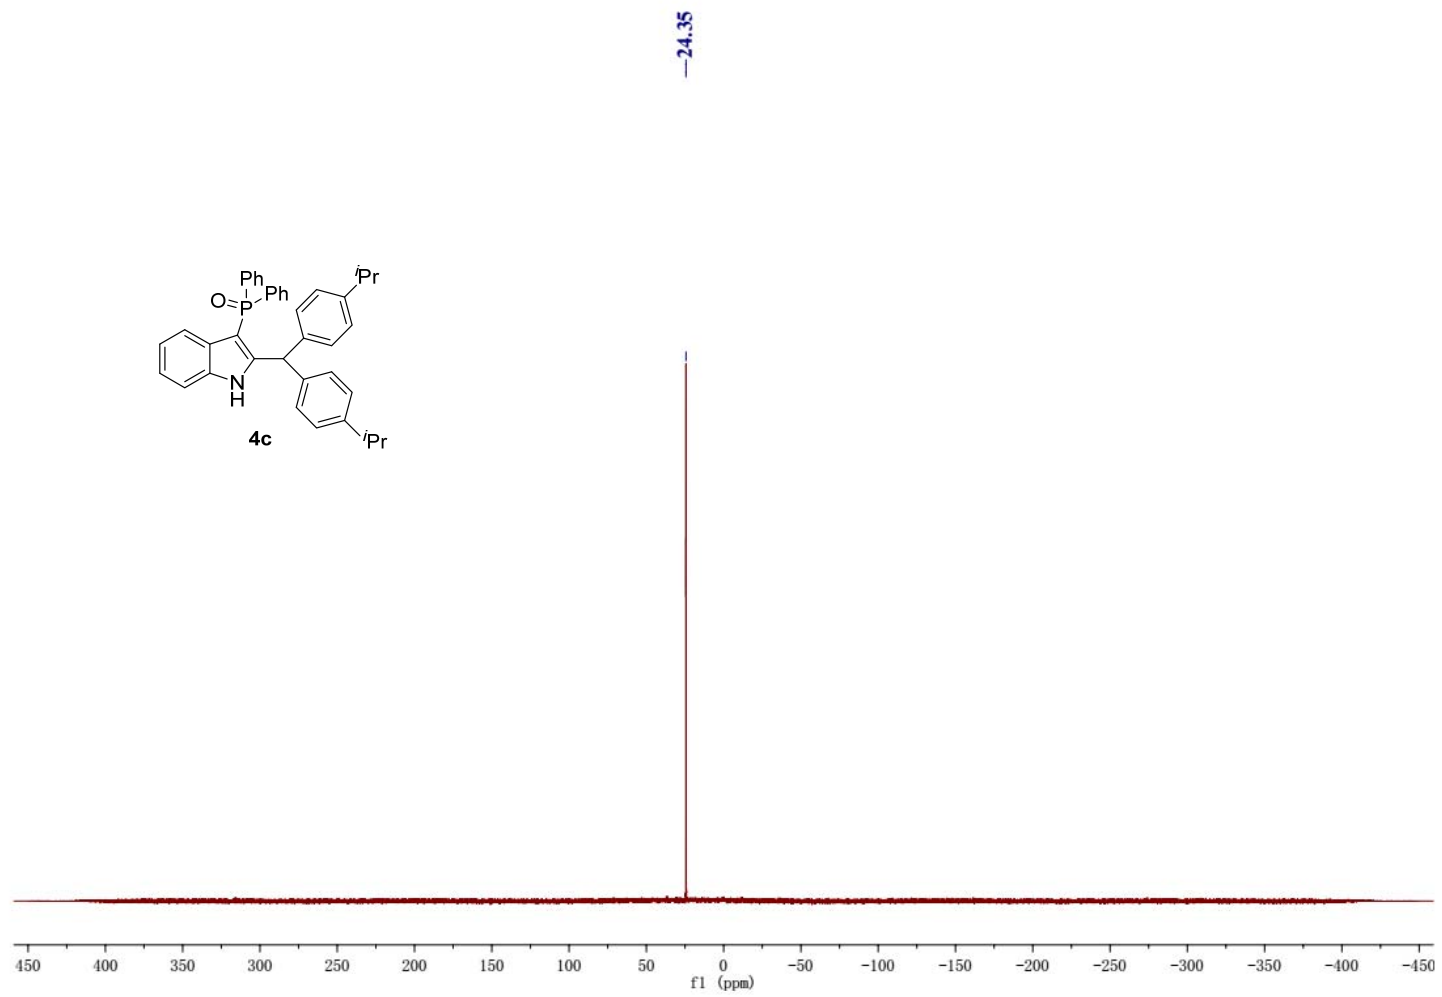



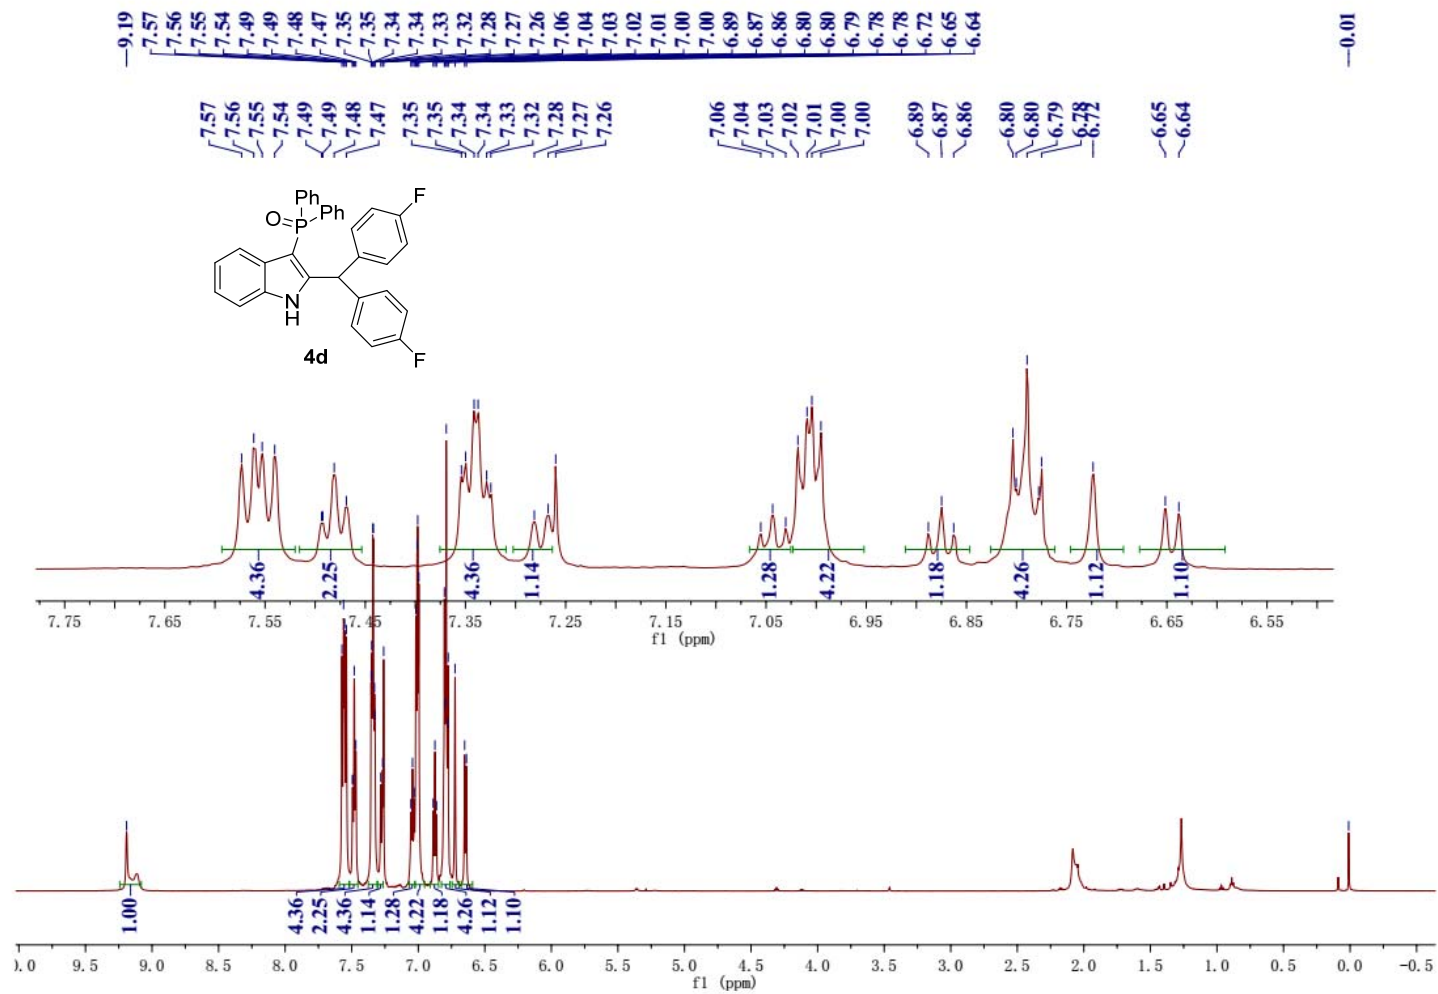

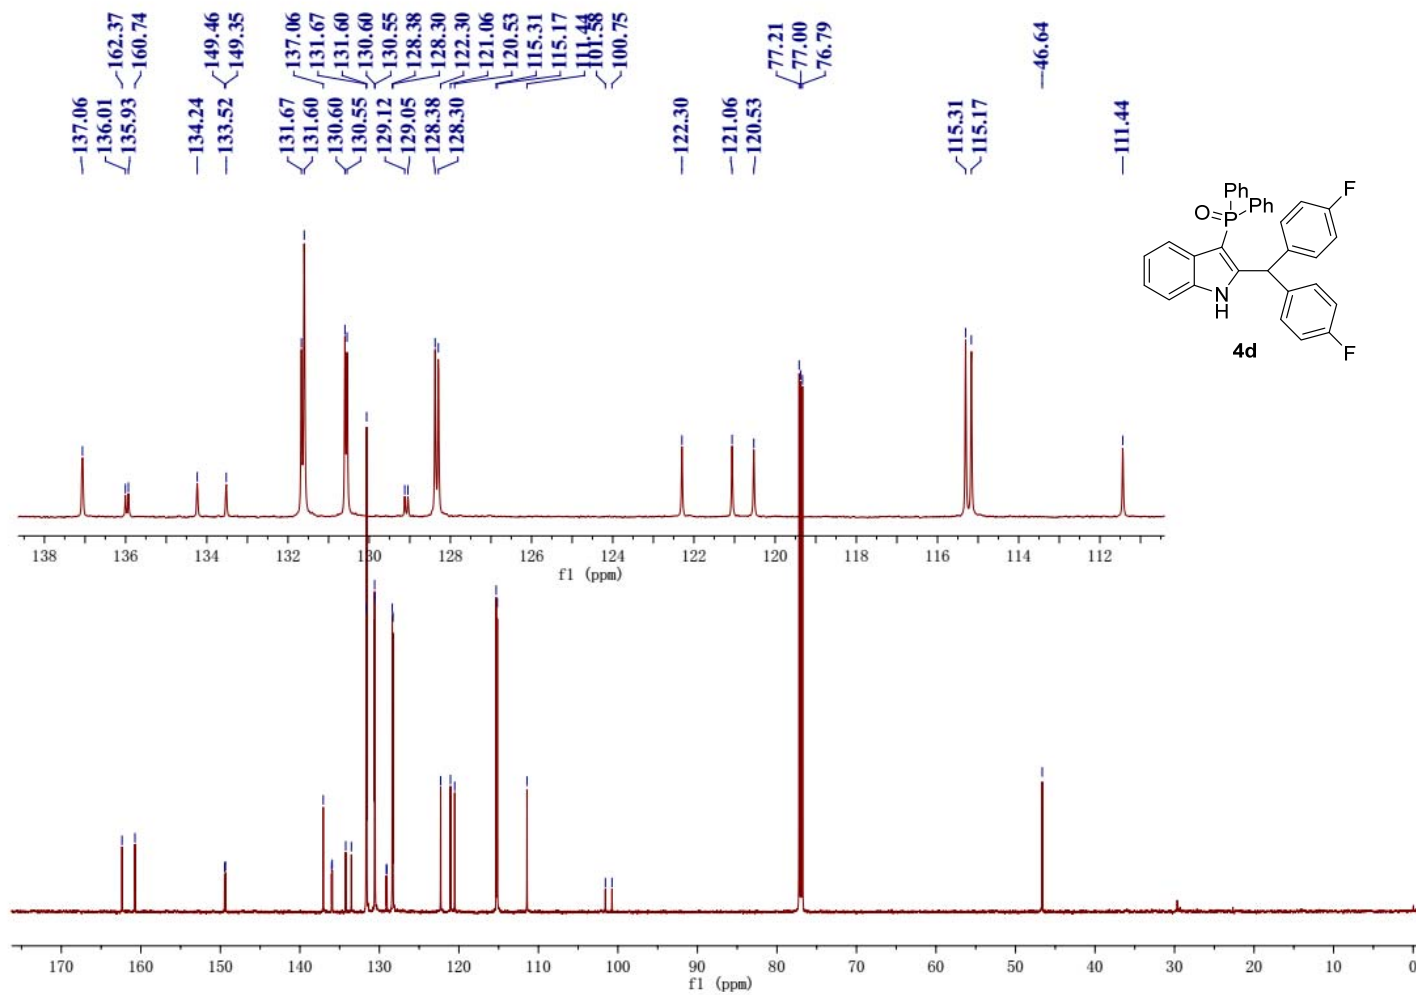

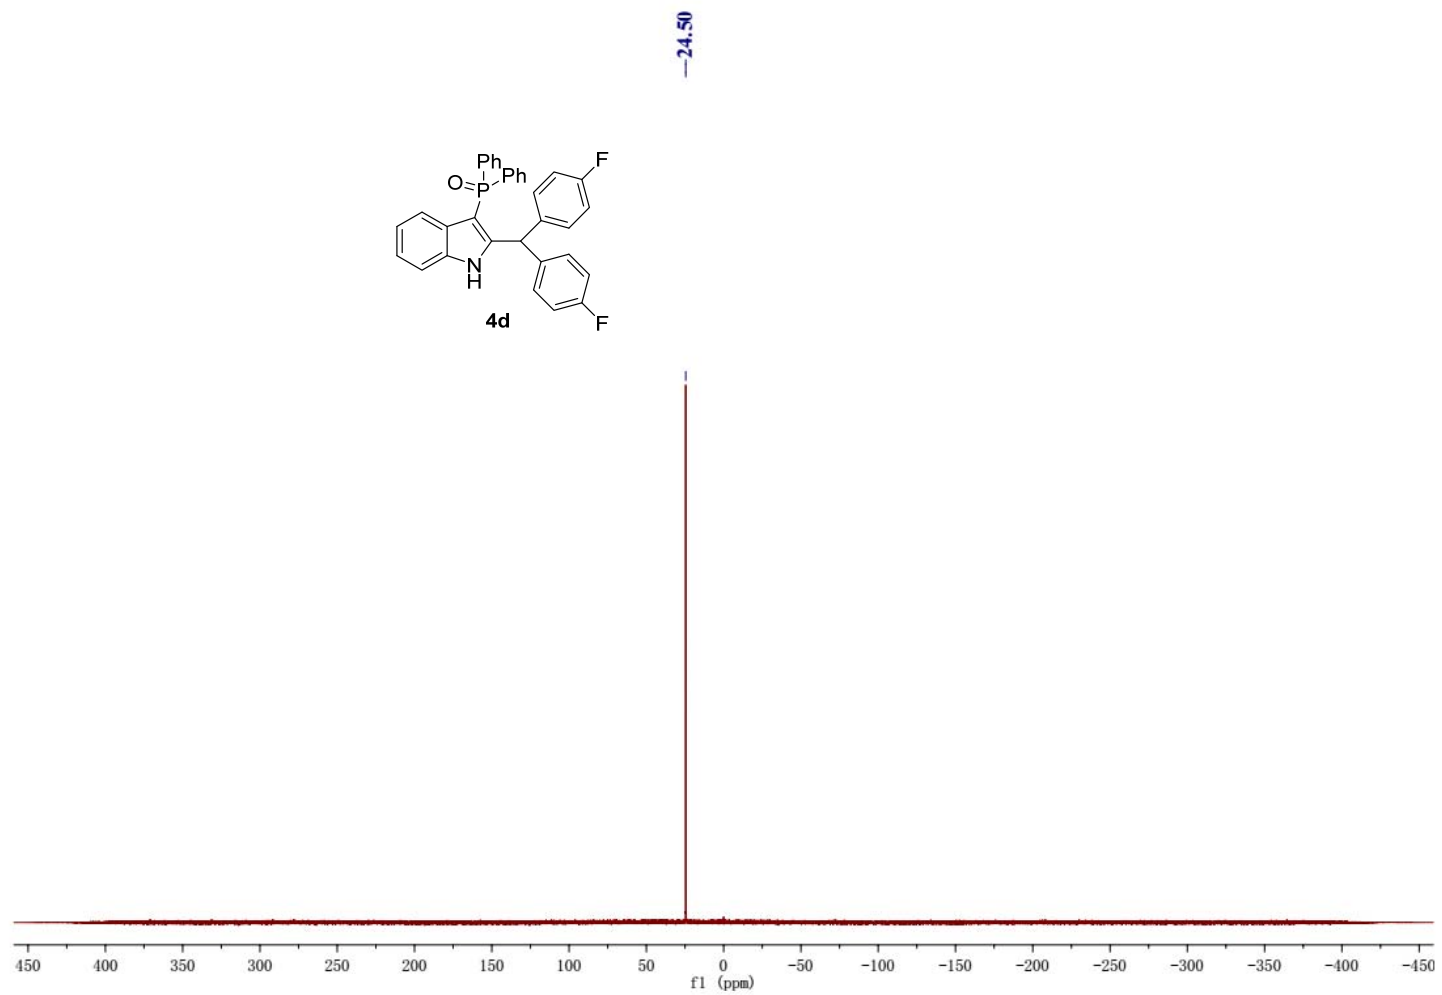

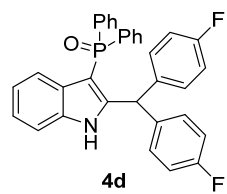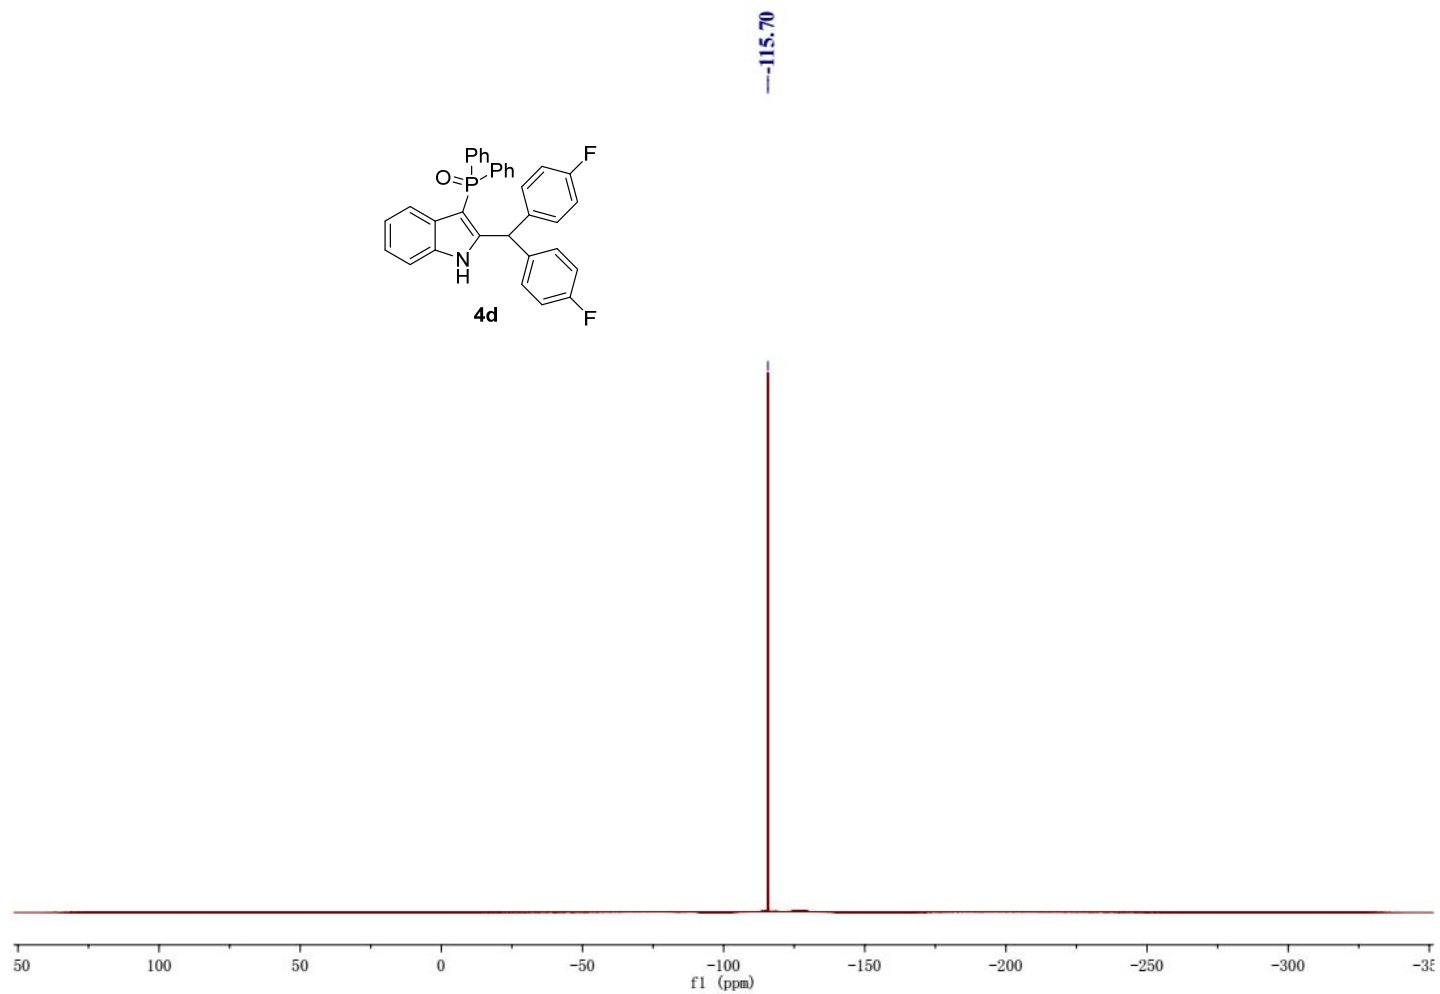



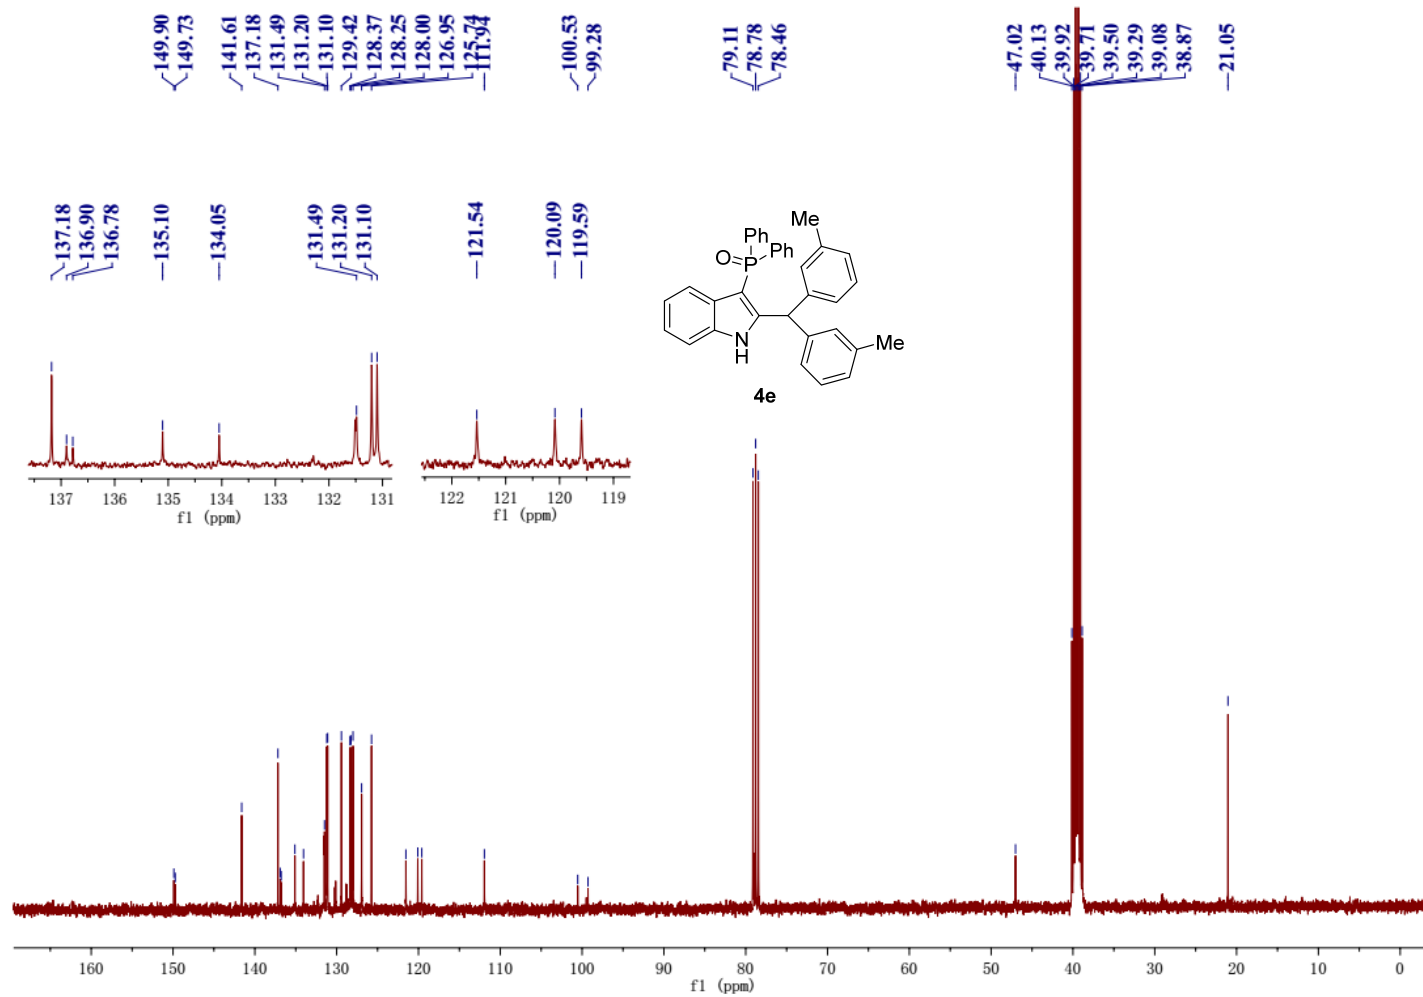

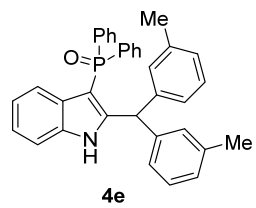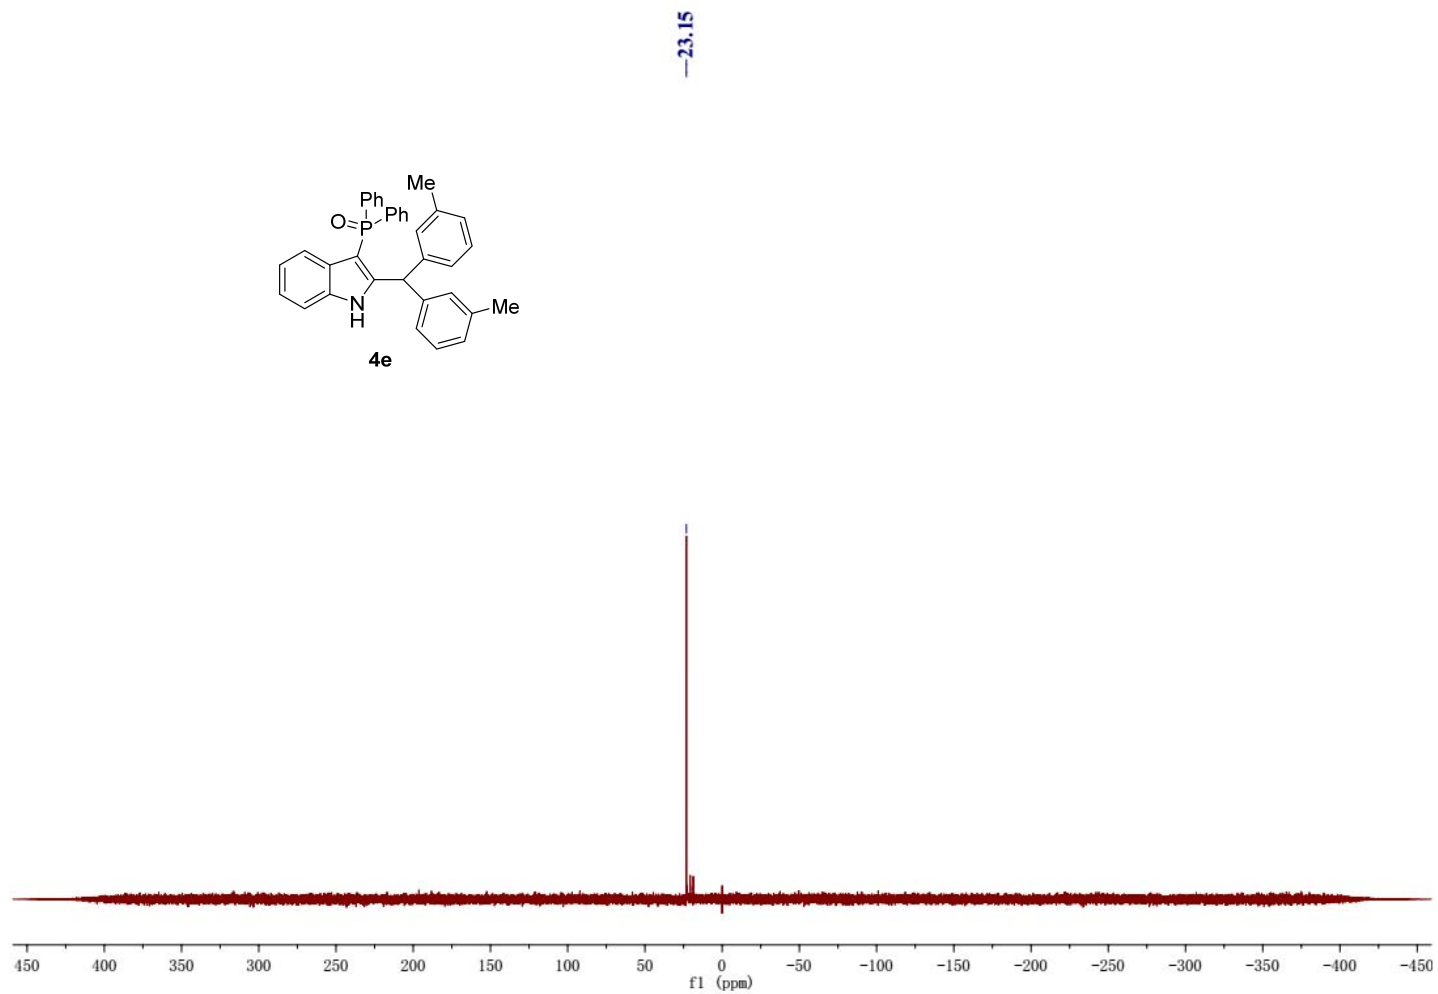

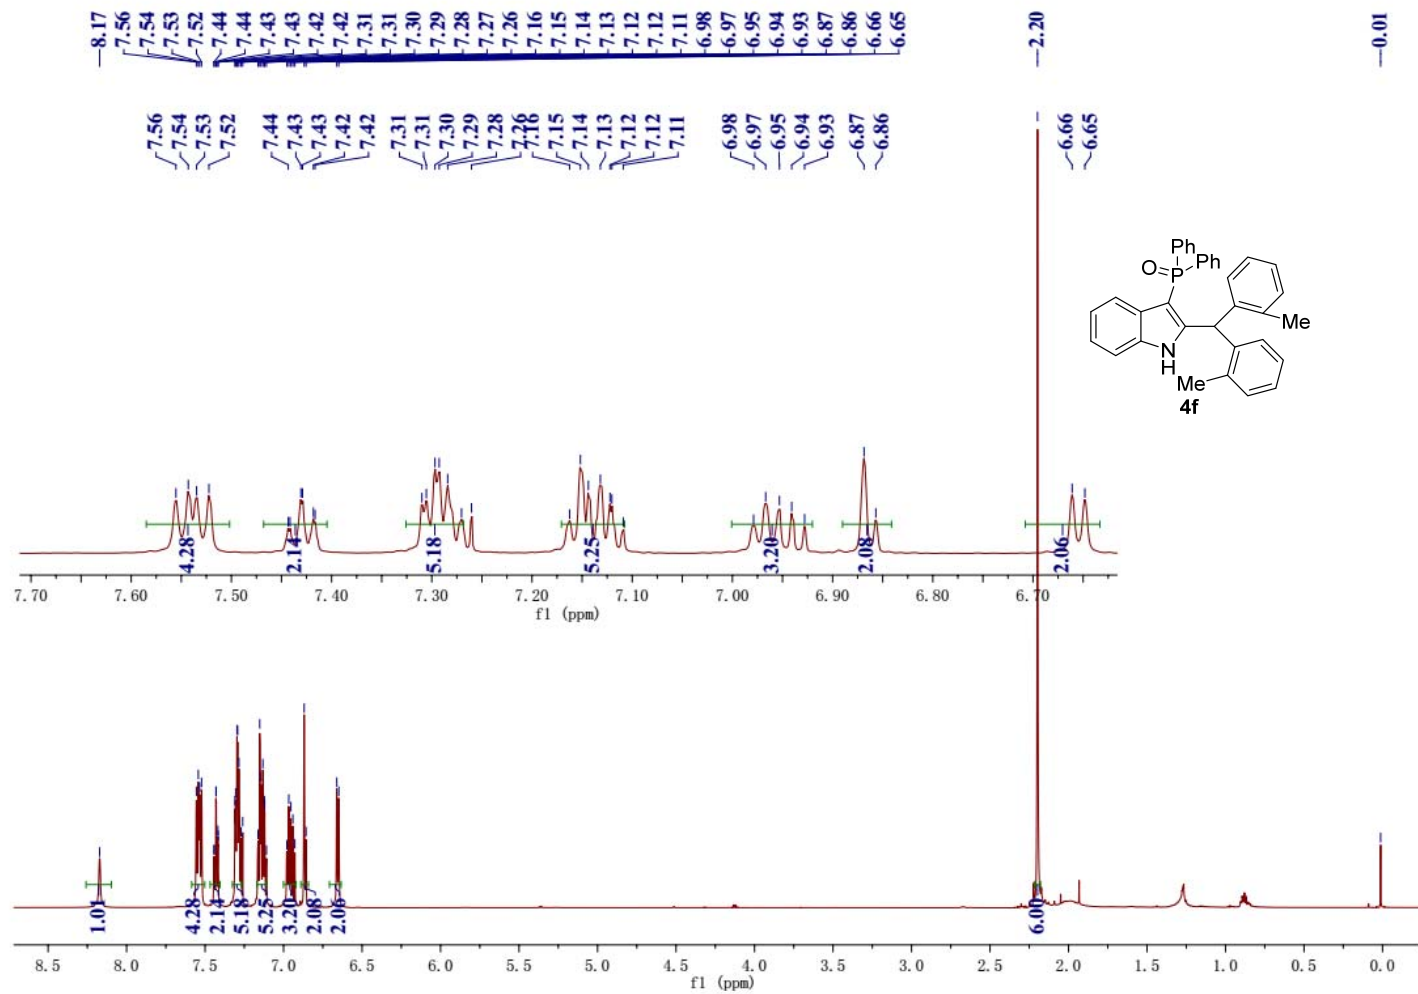



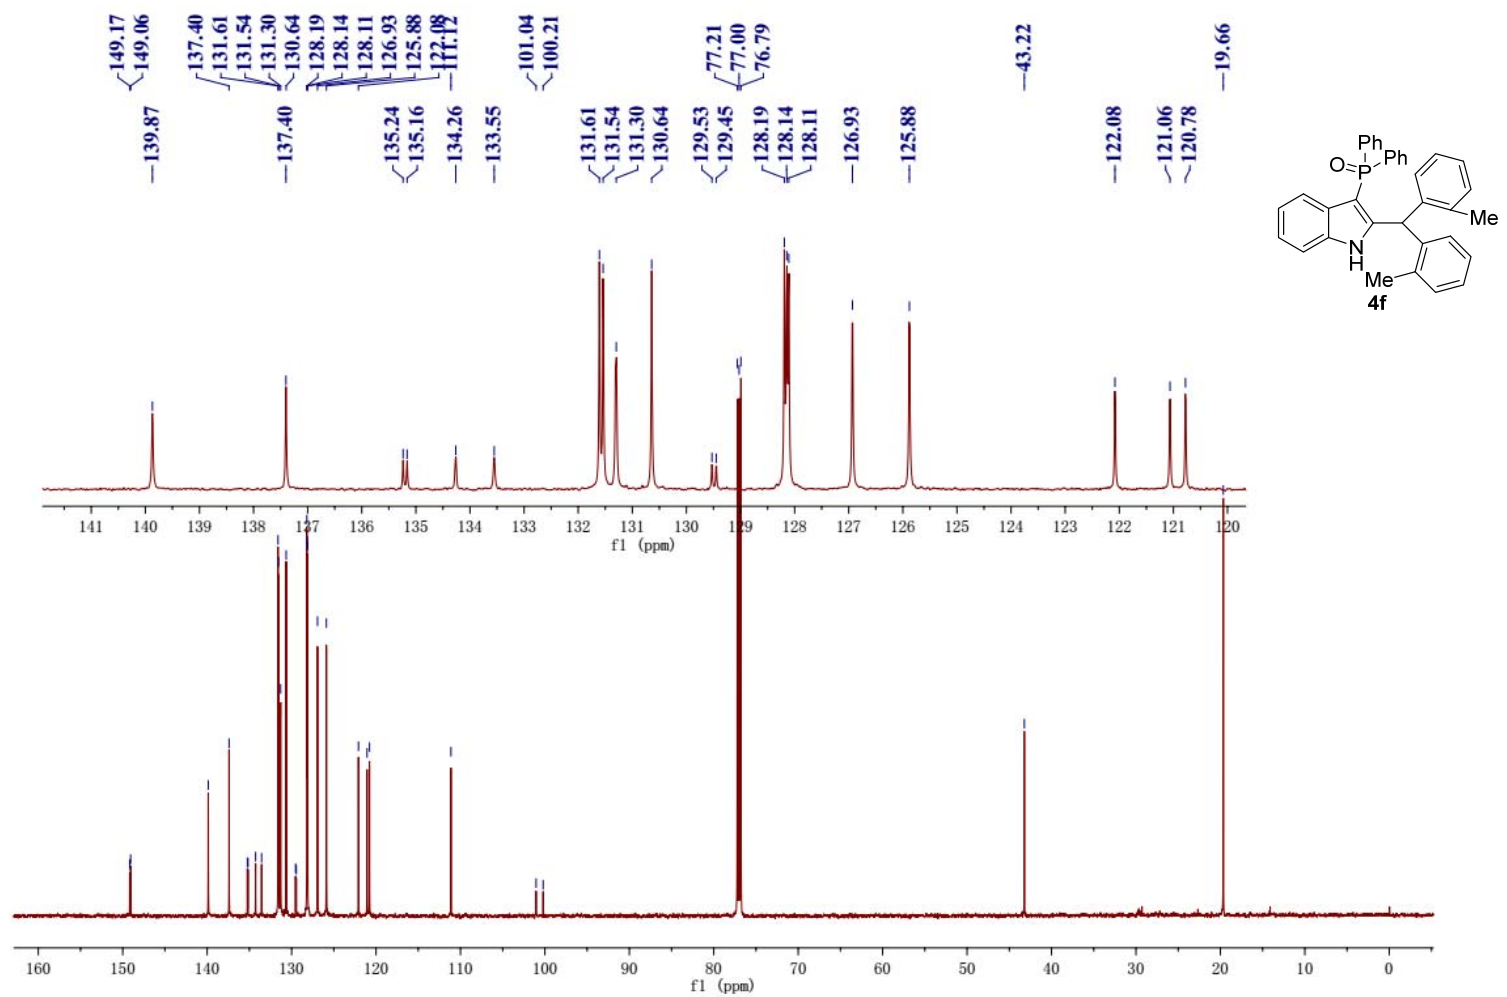

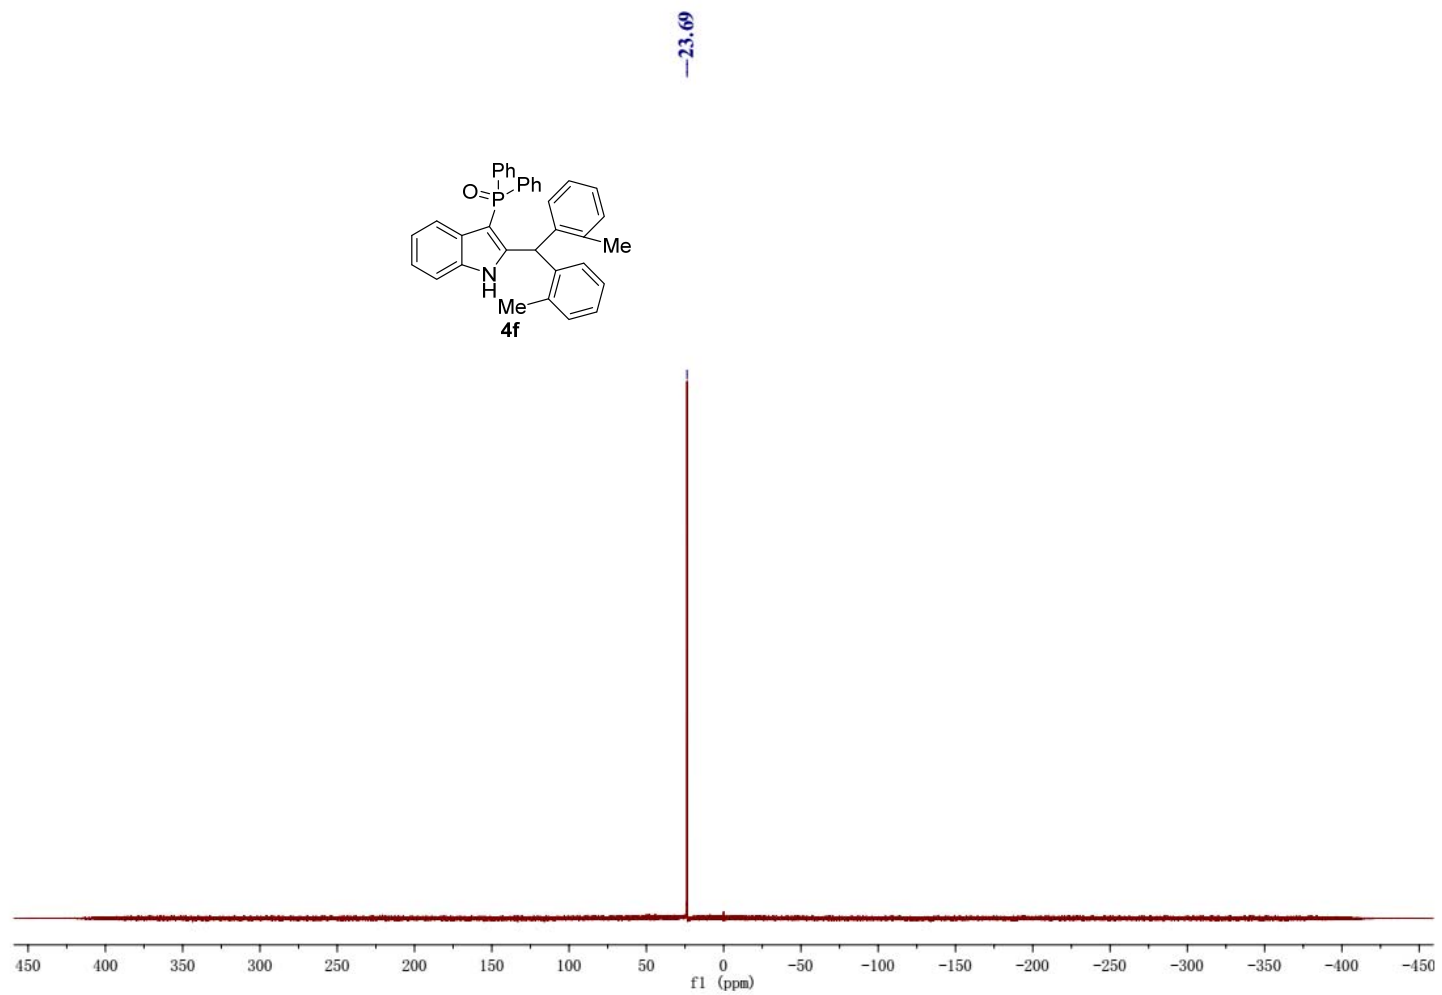

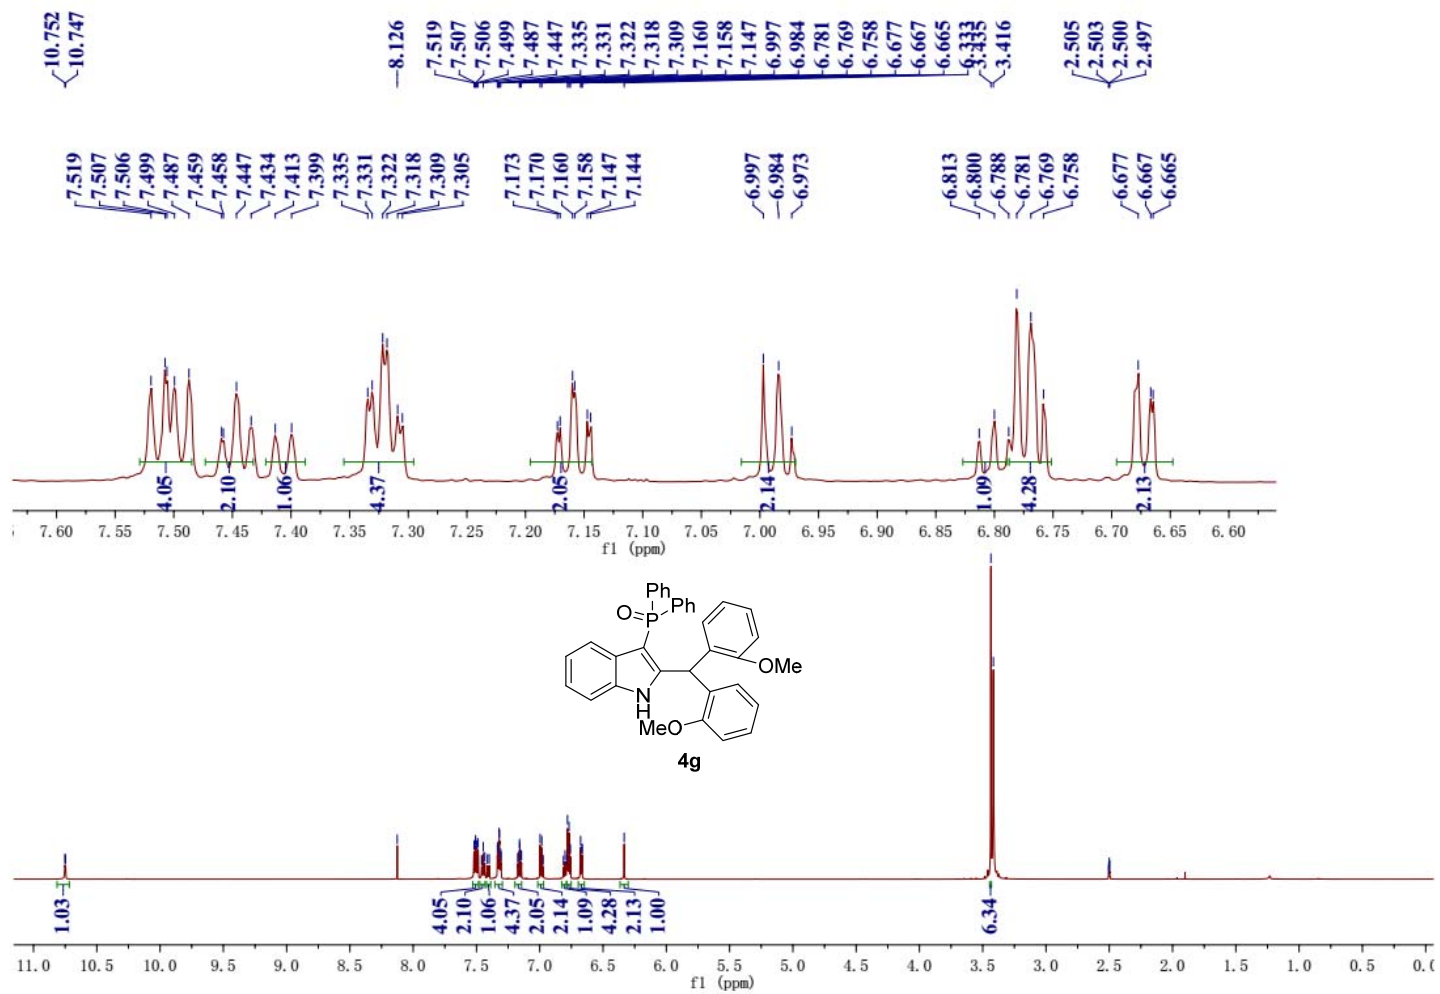

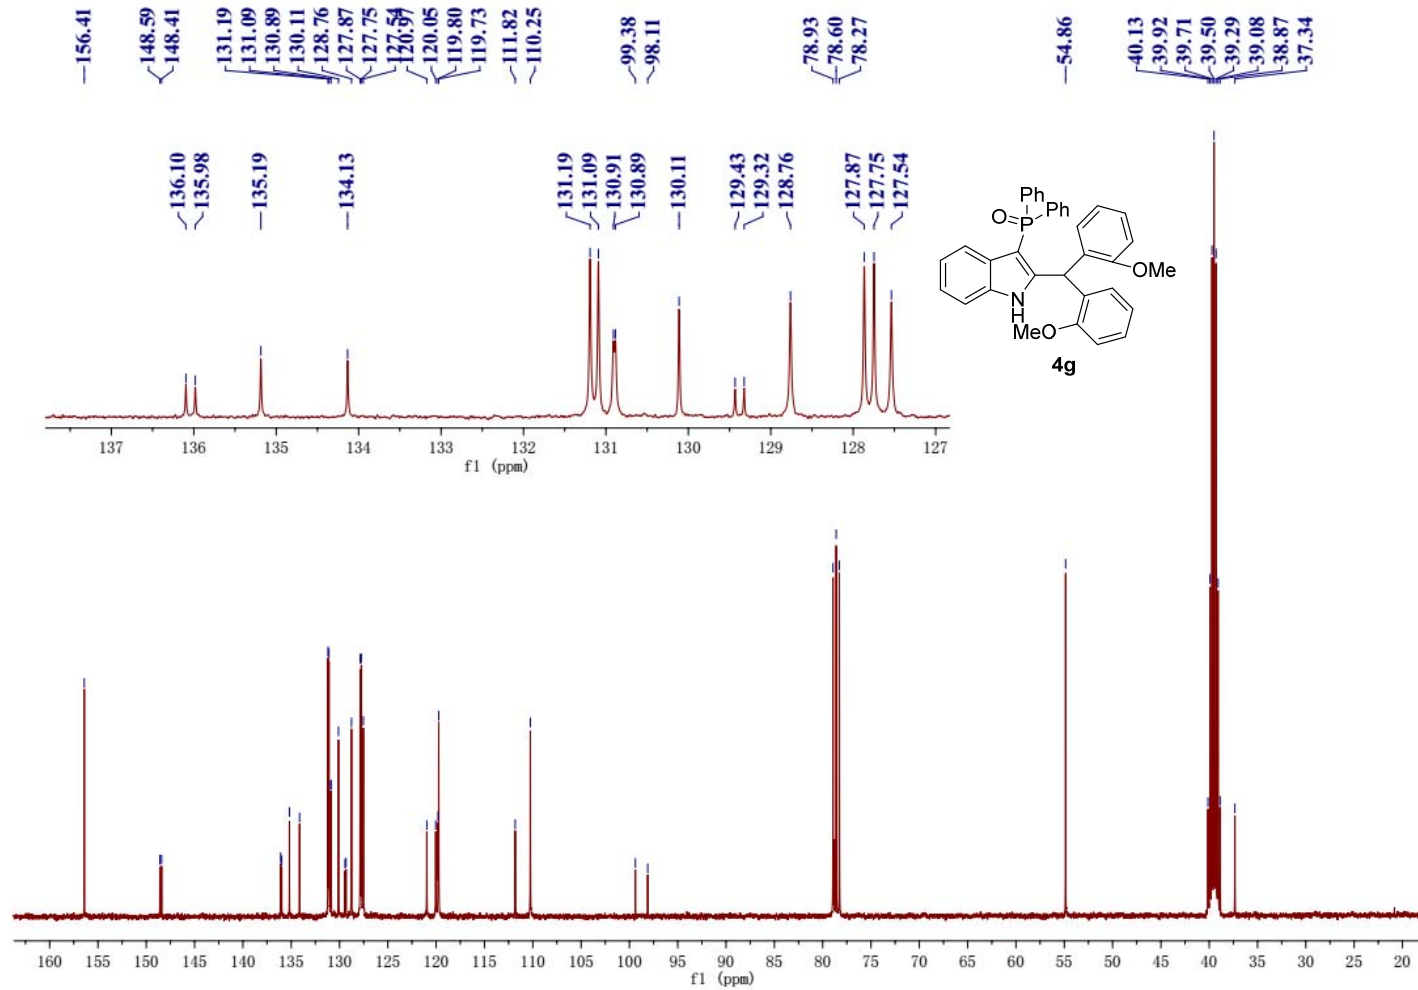

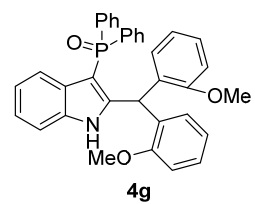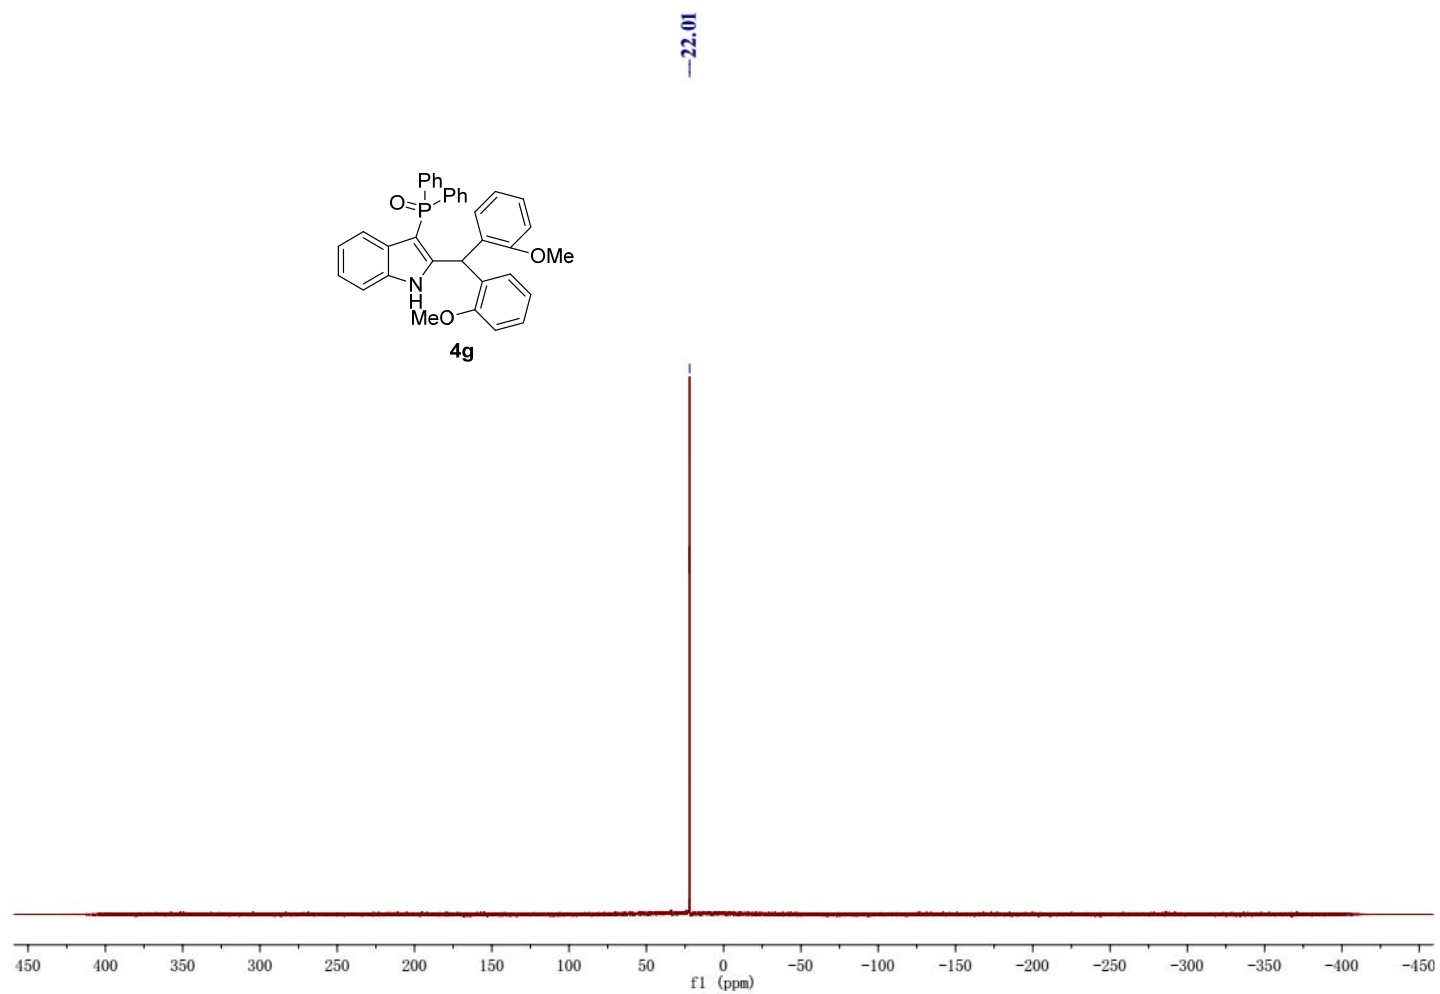

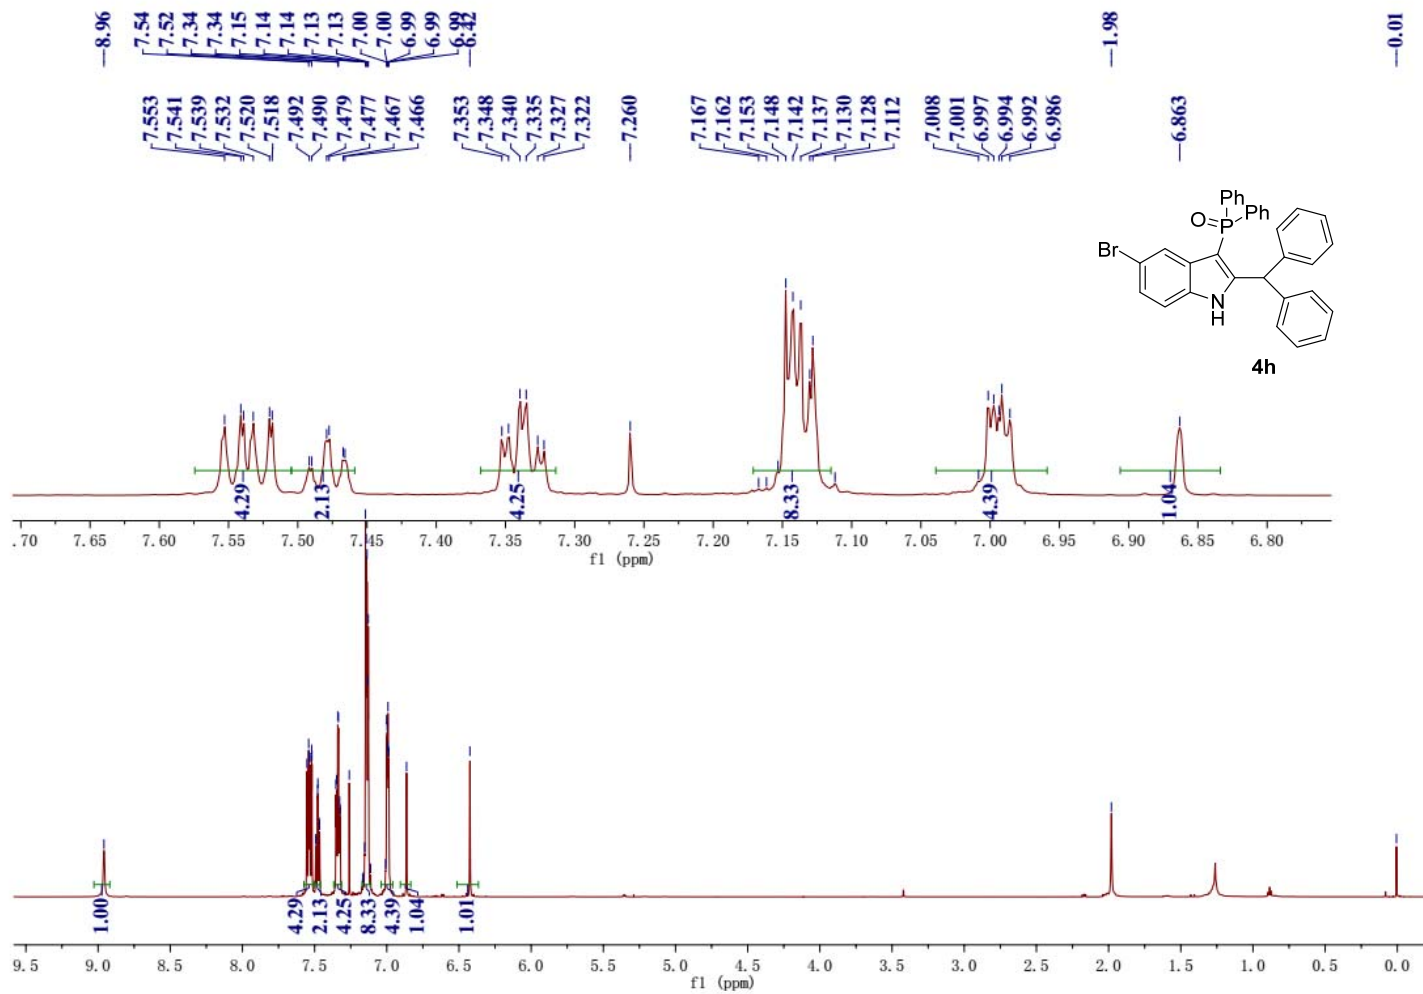

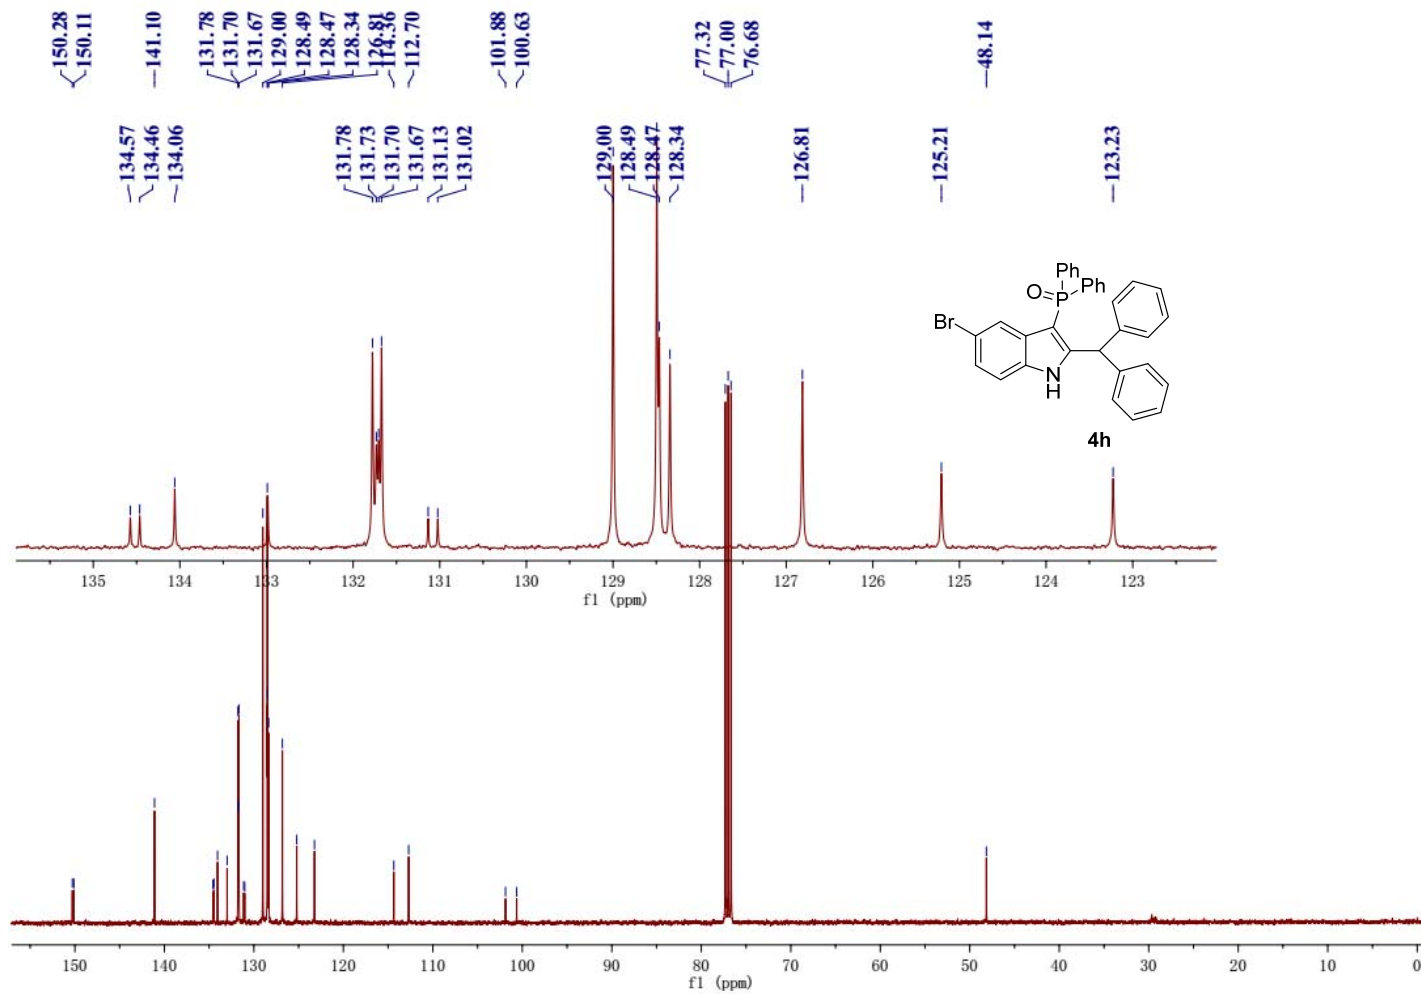

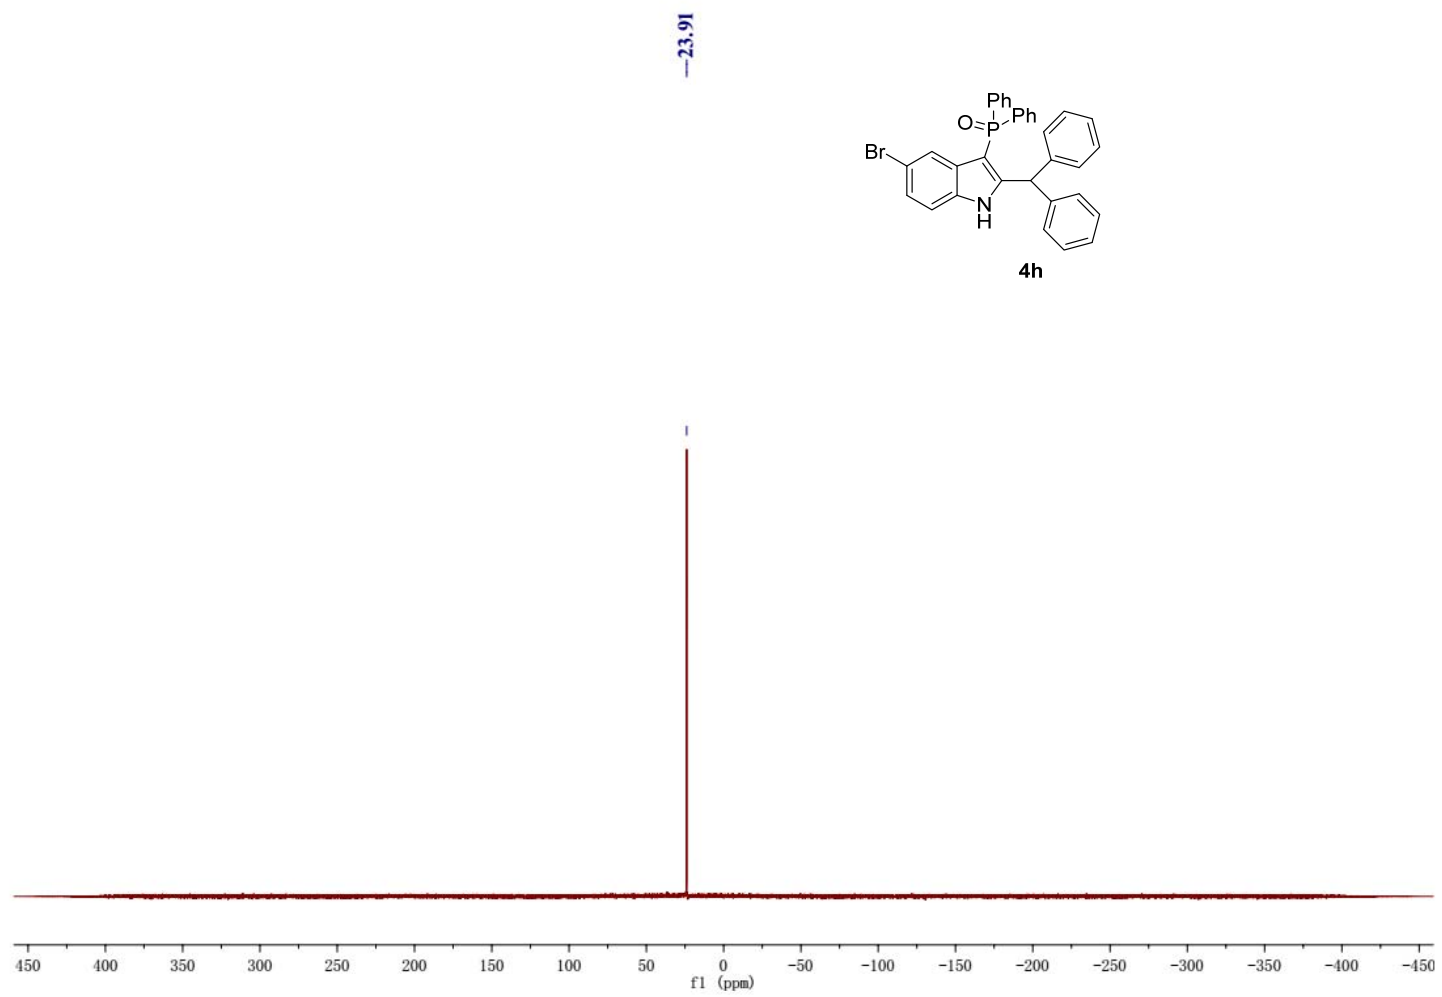



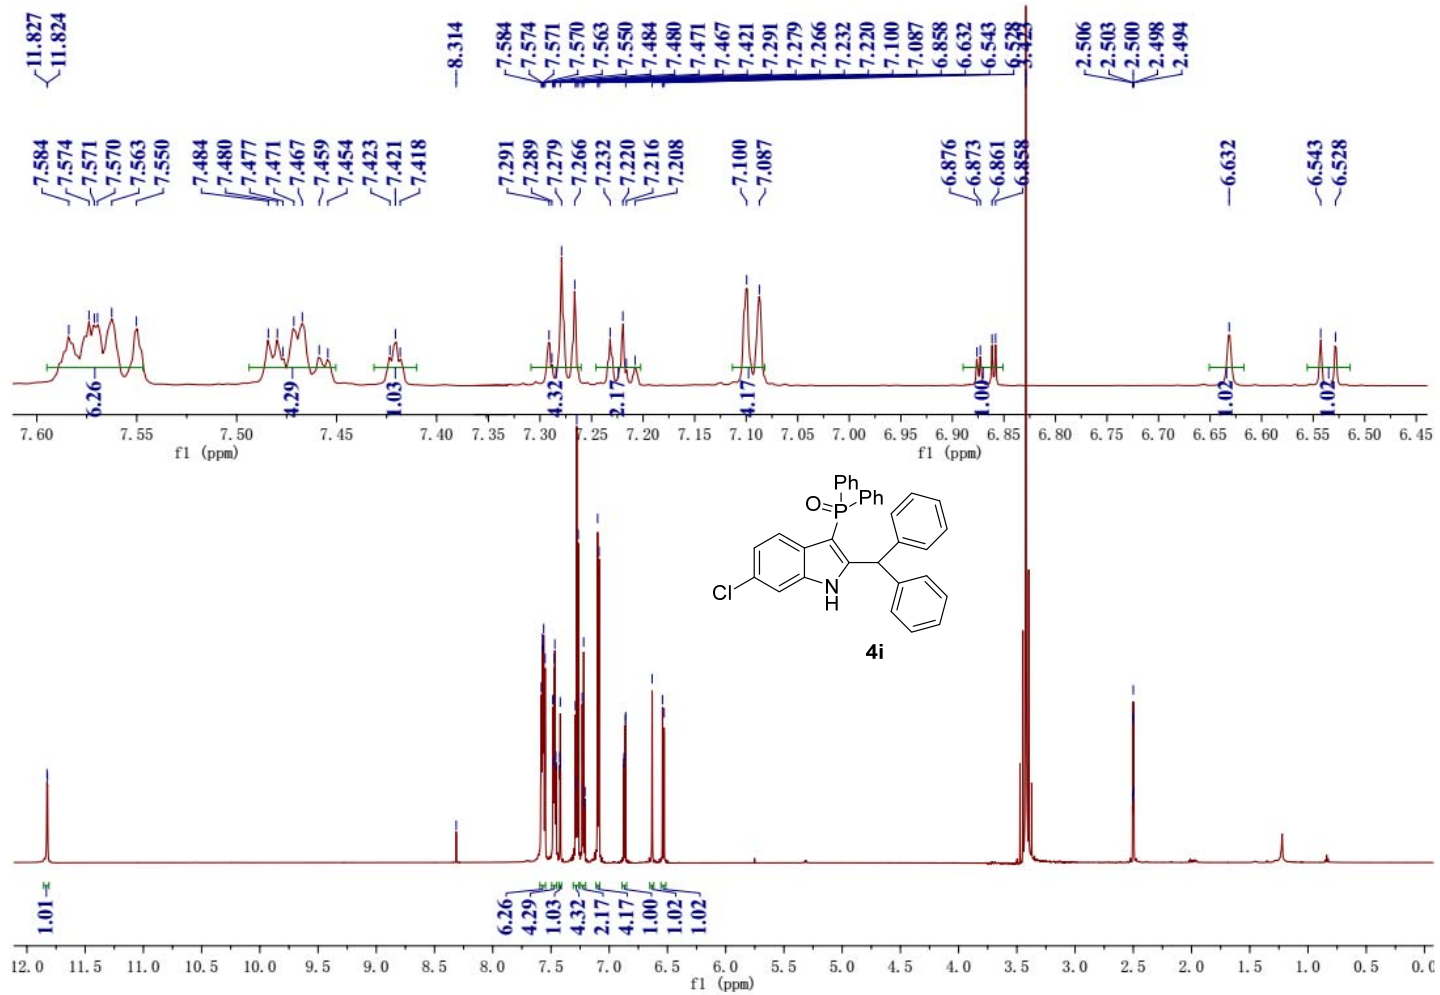

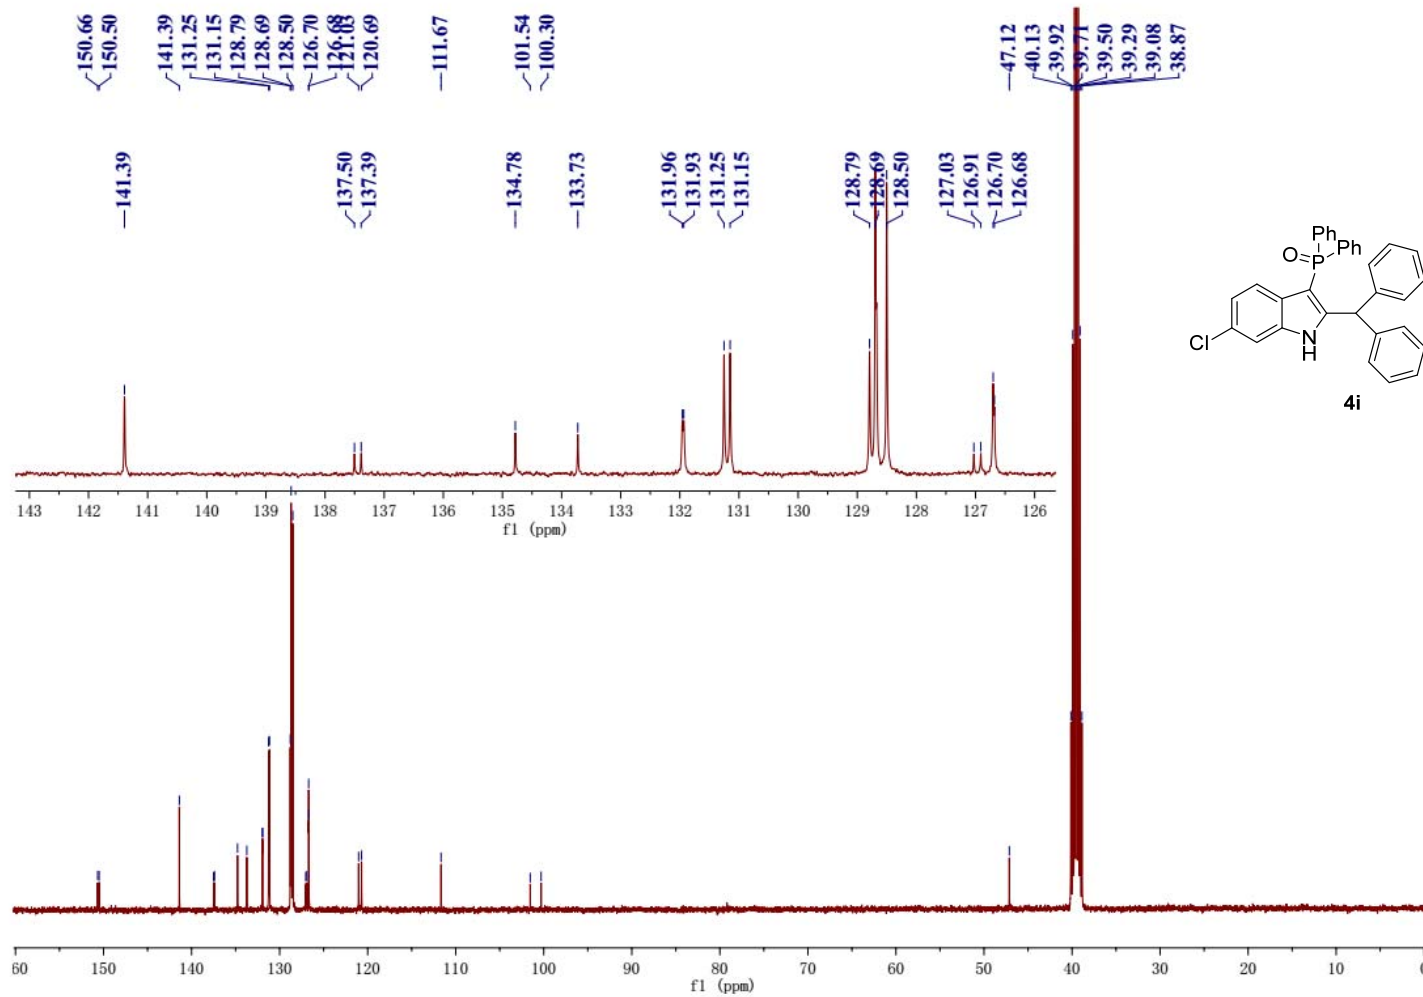

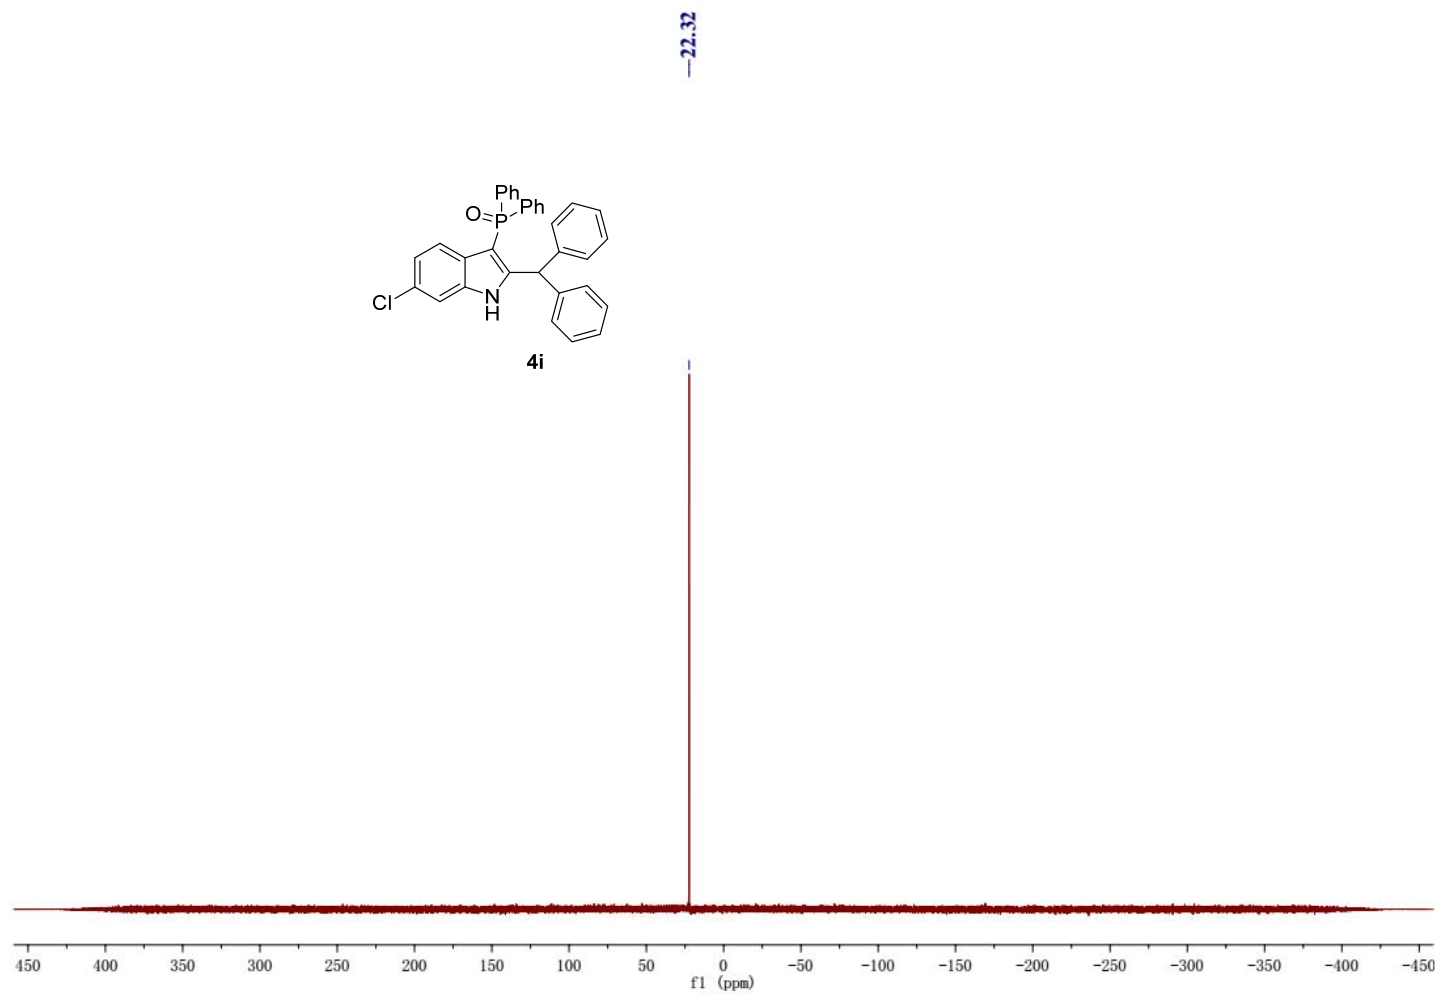

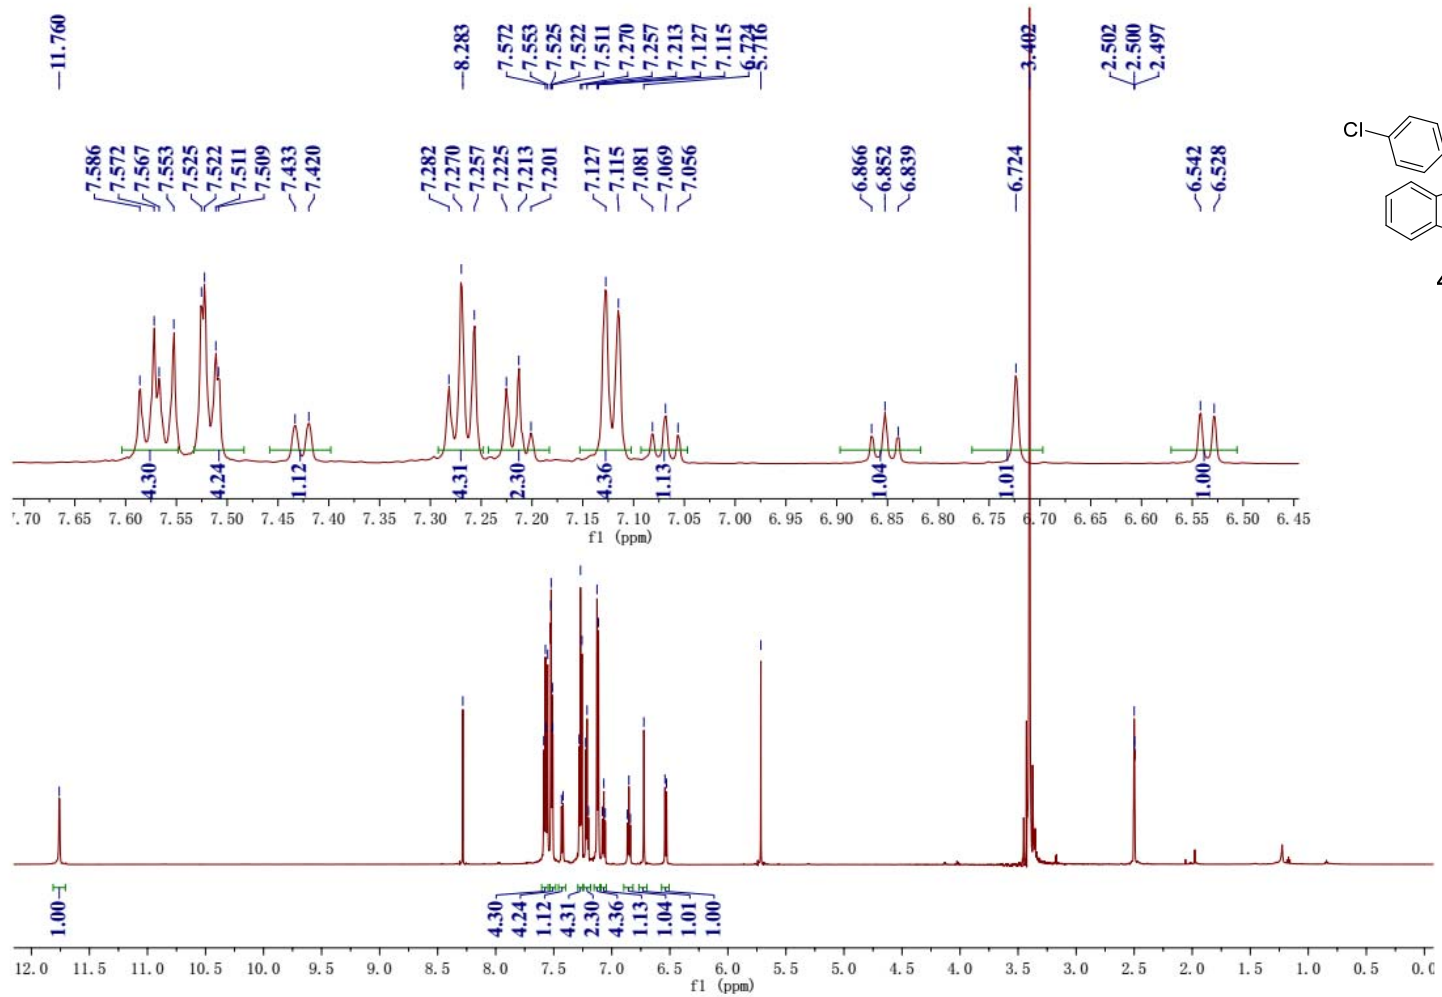

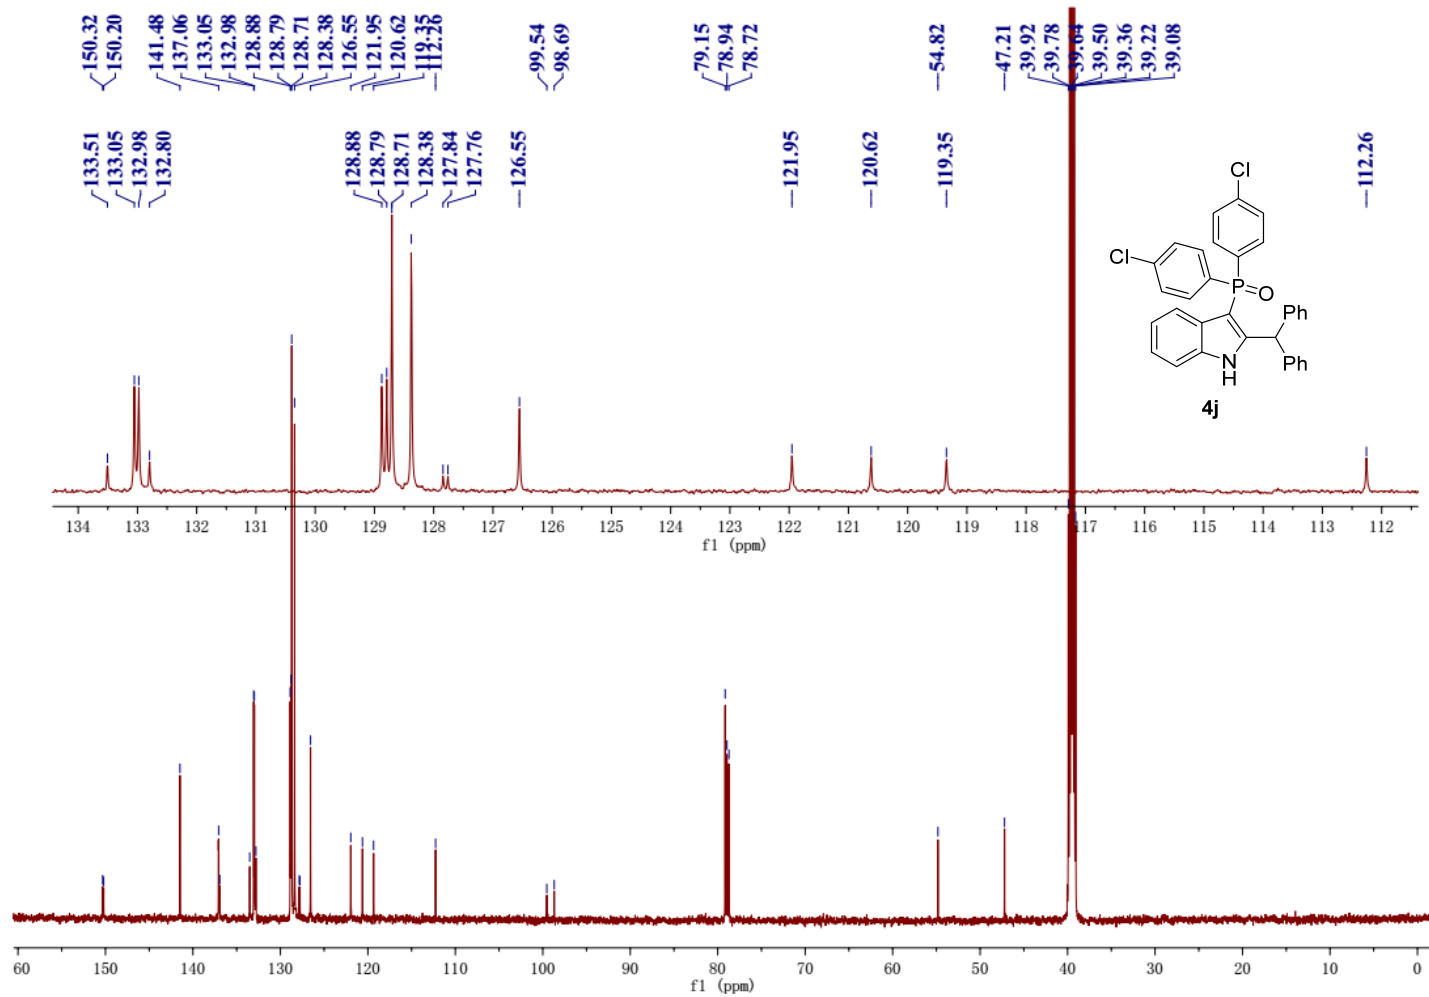

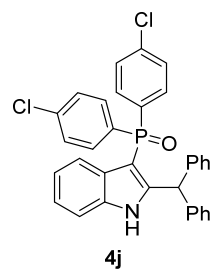

—22.56

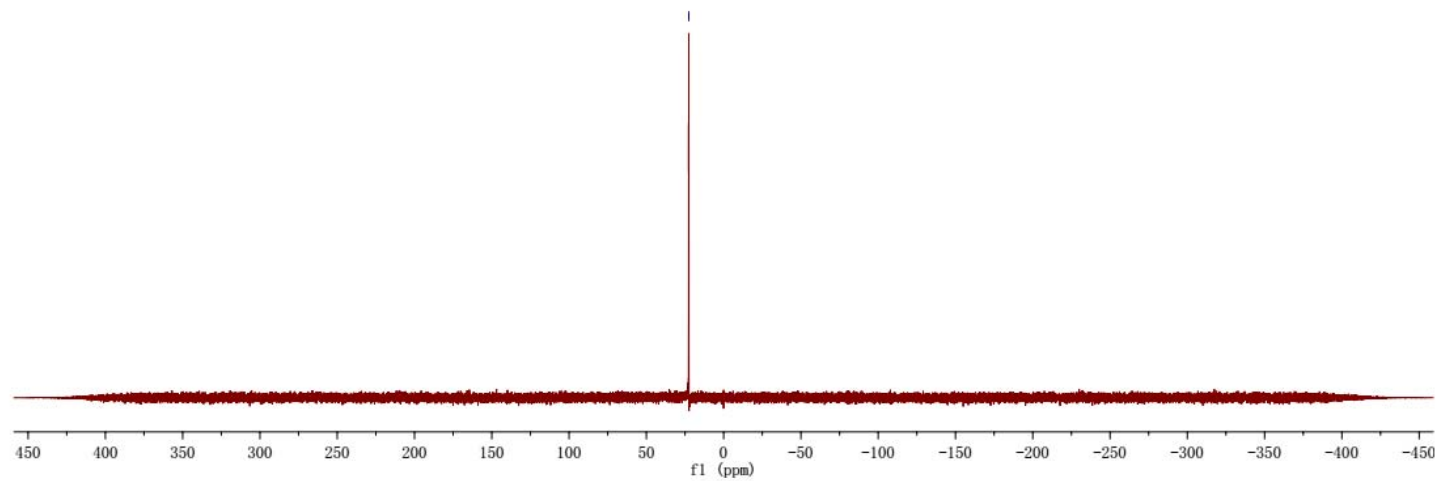

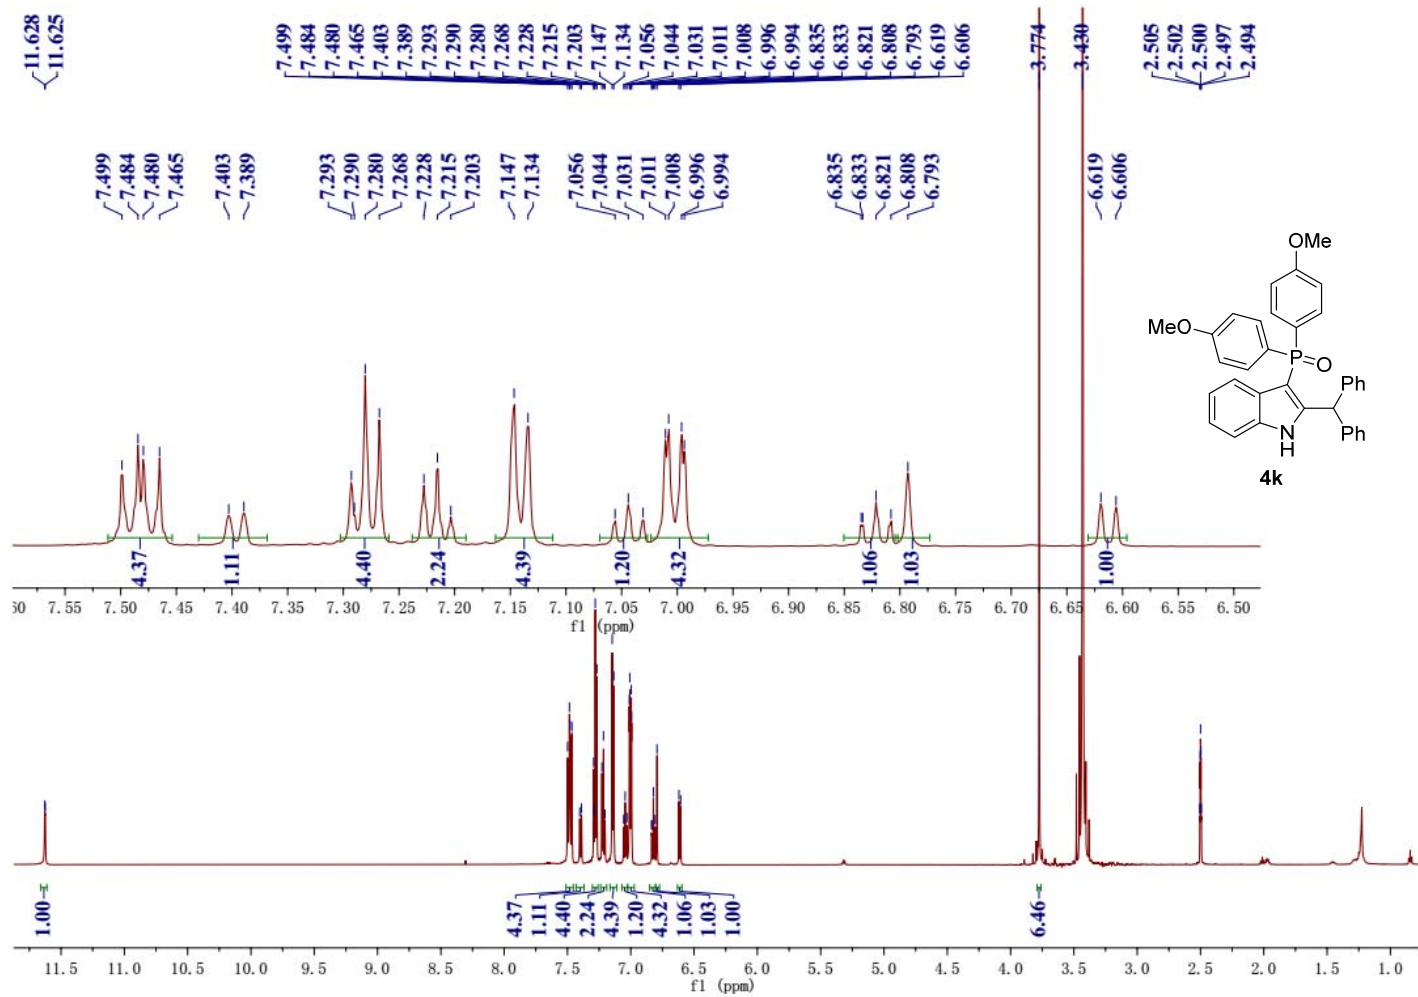

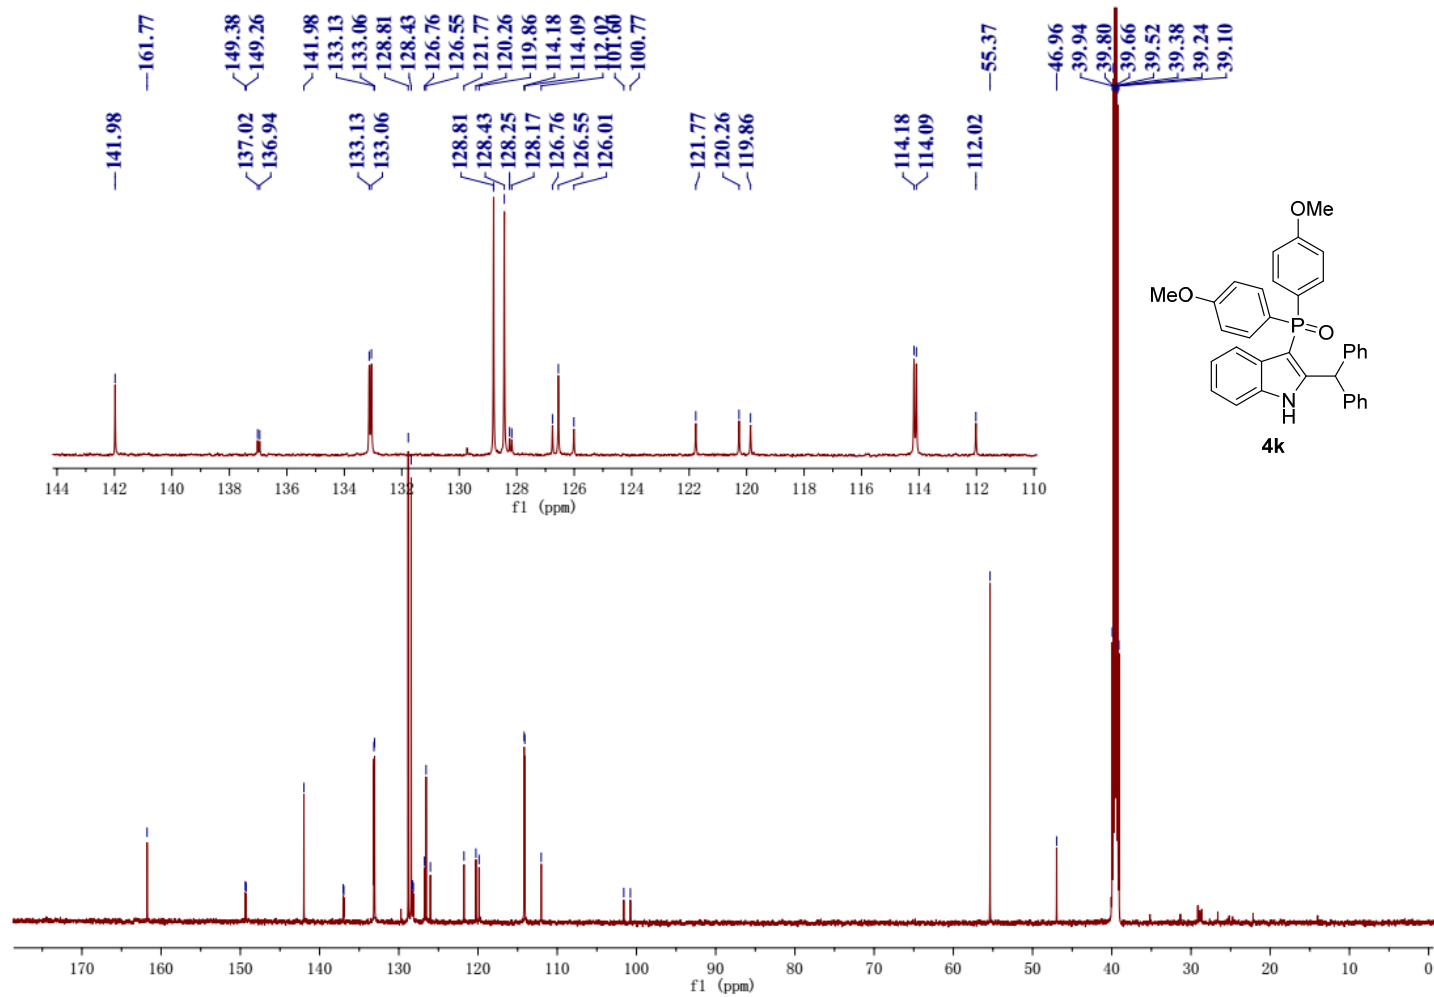



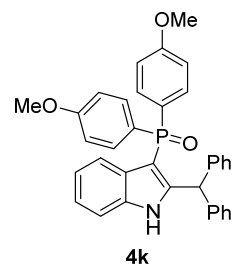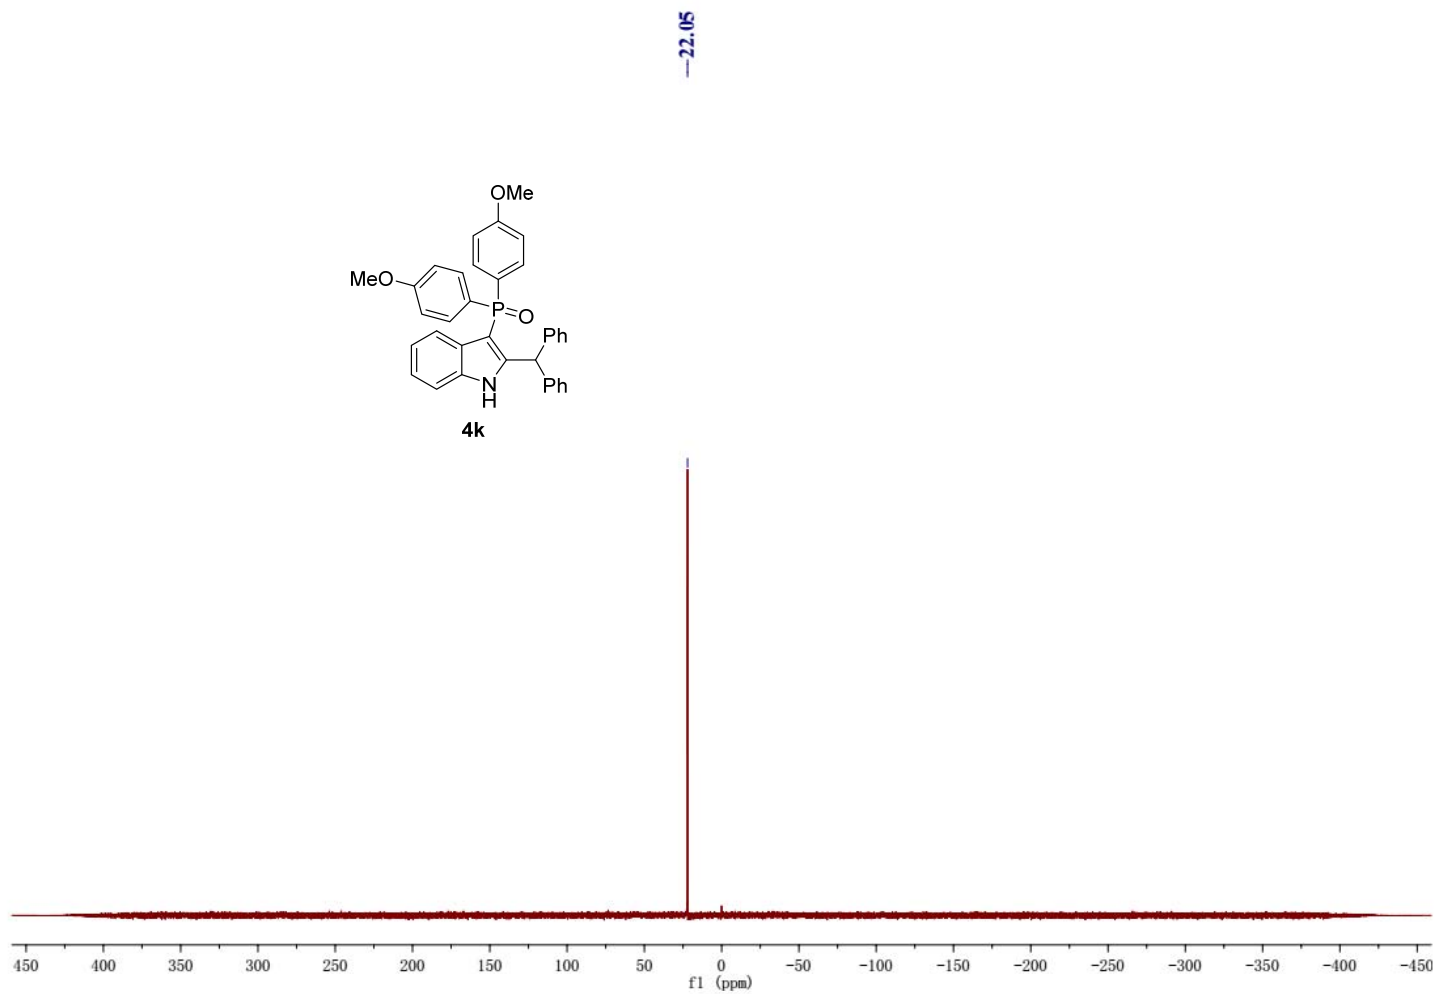

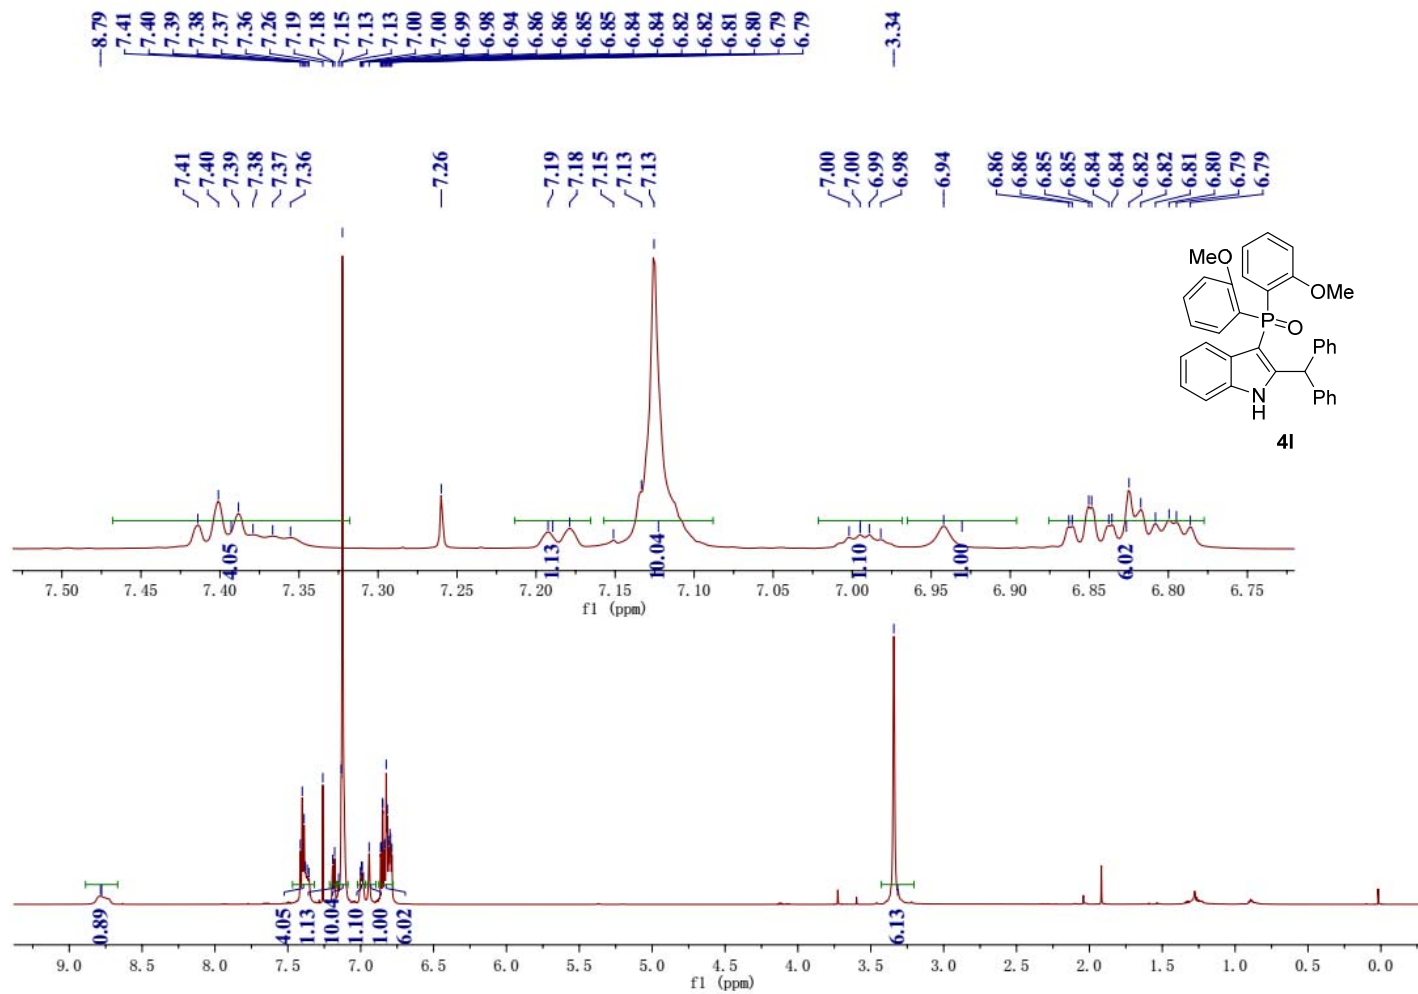

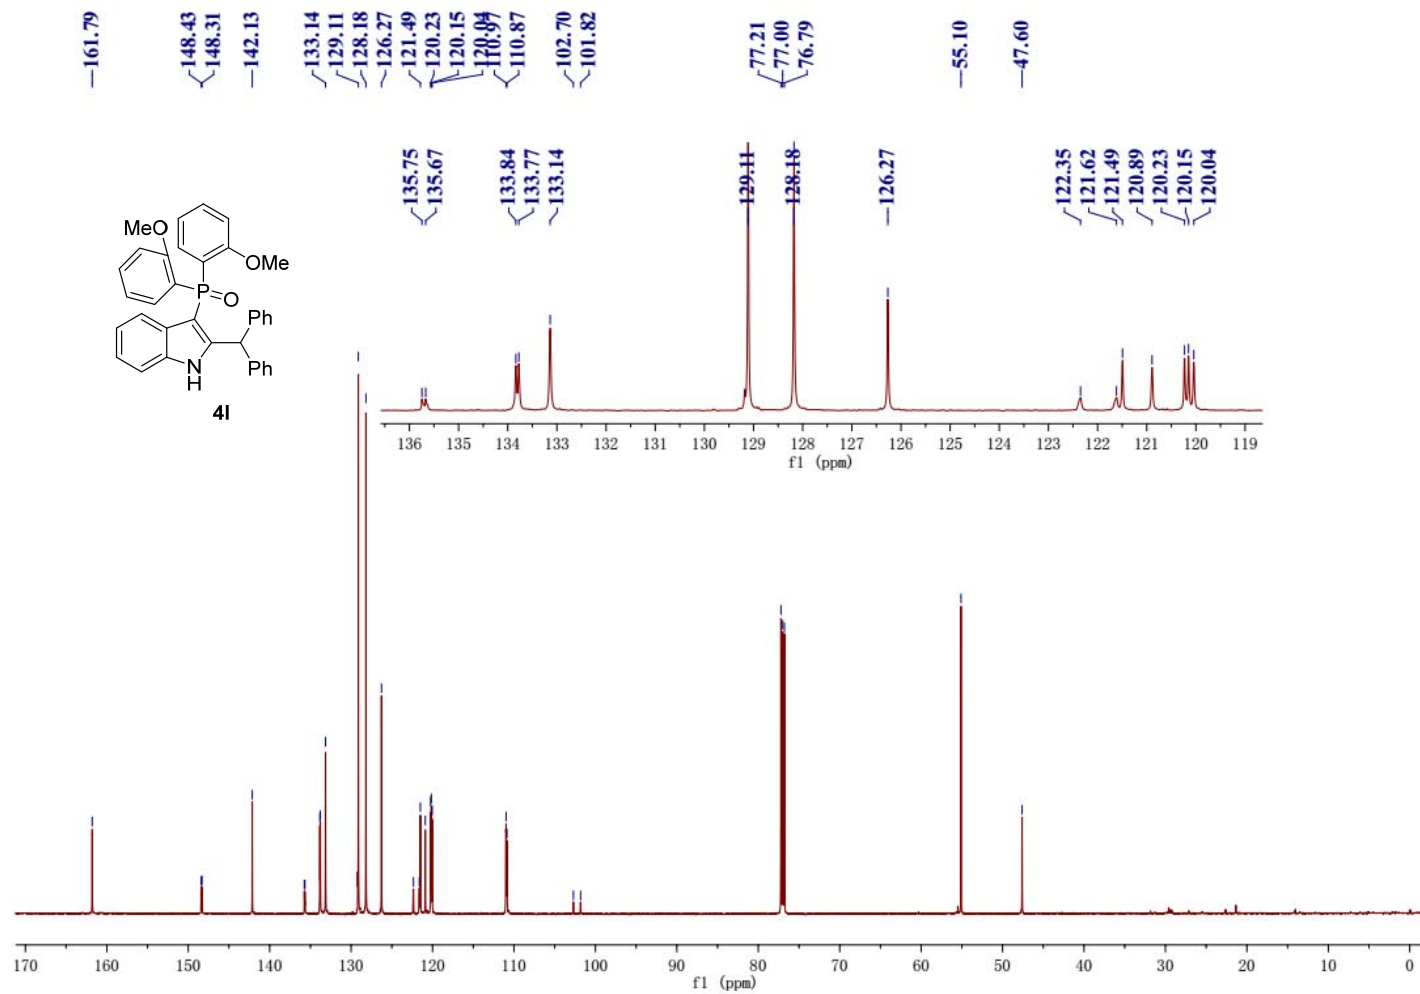

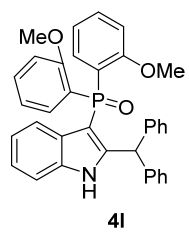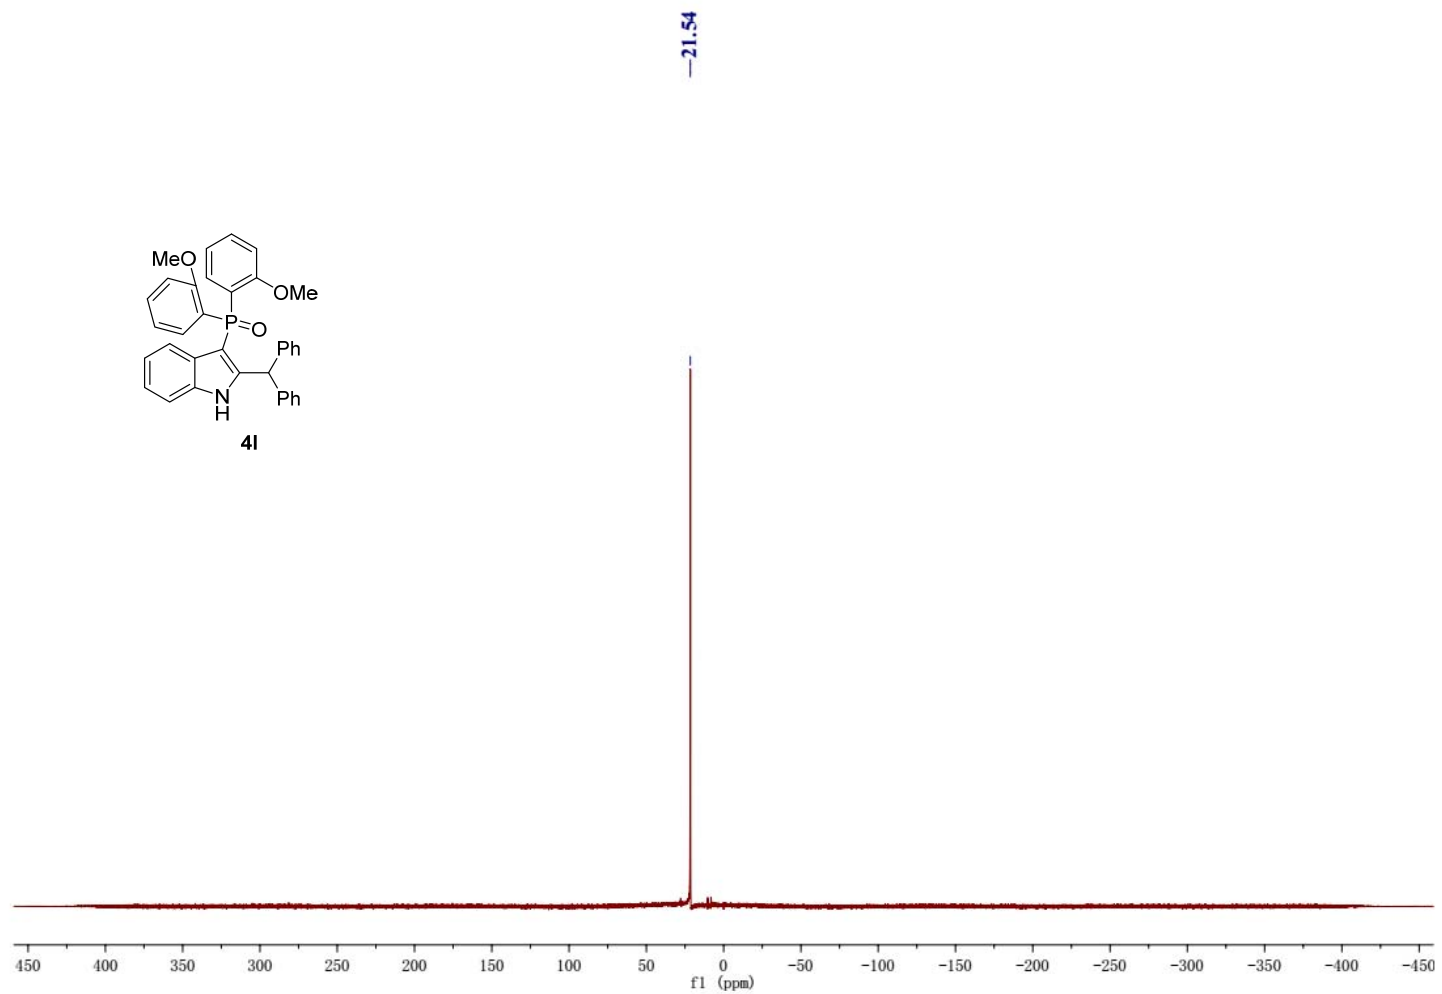

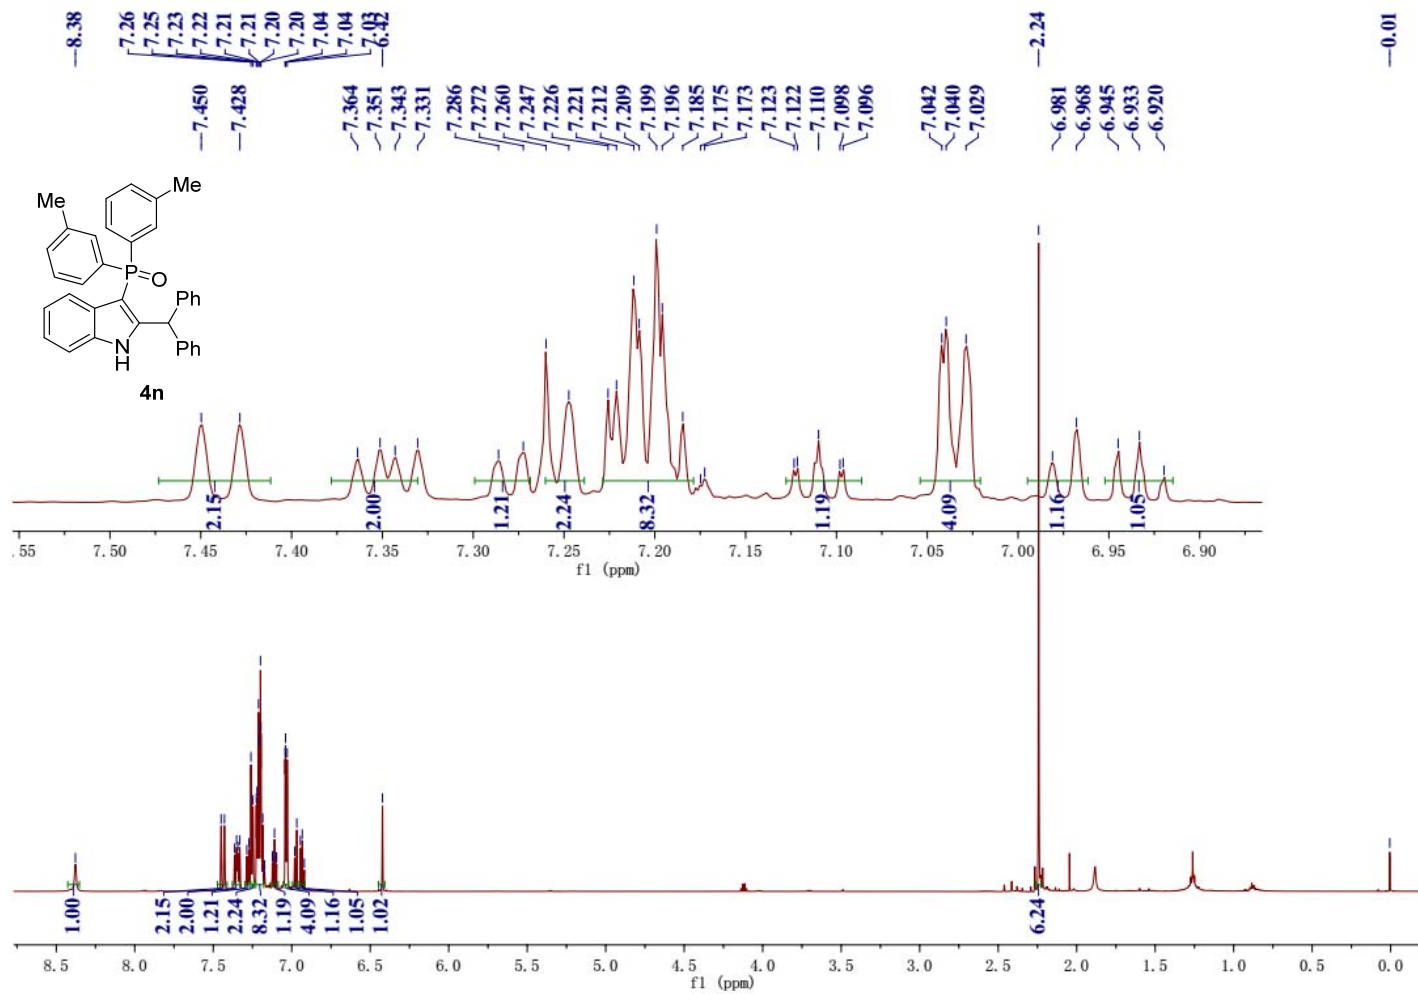

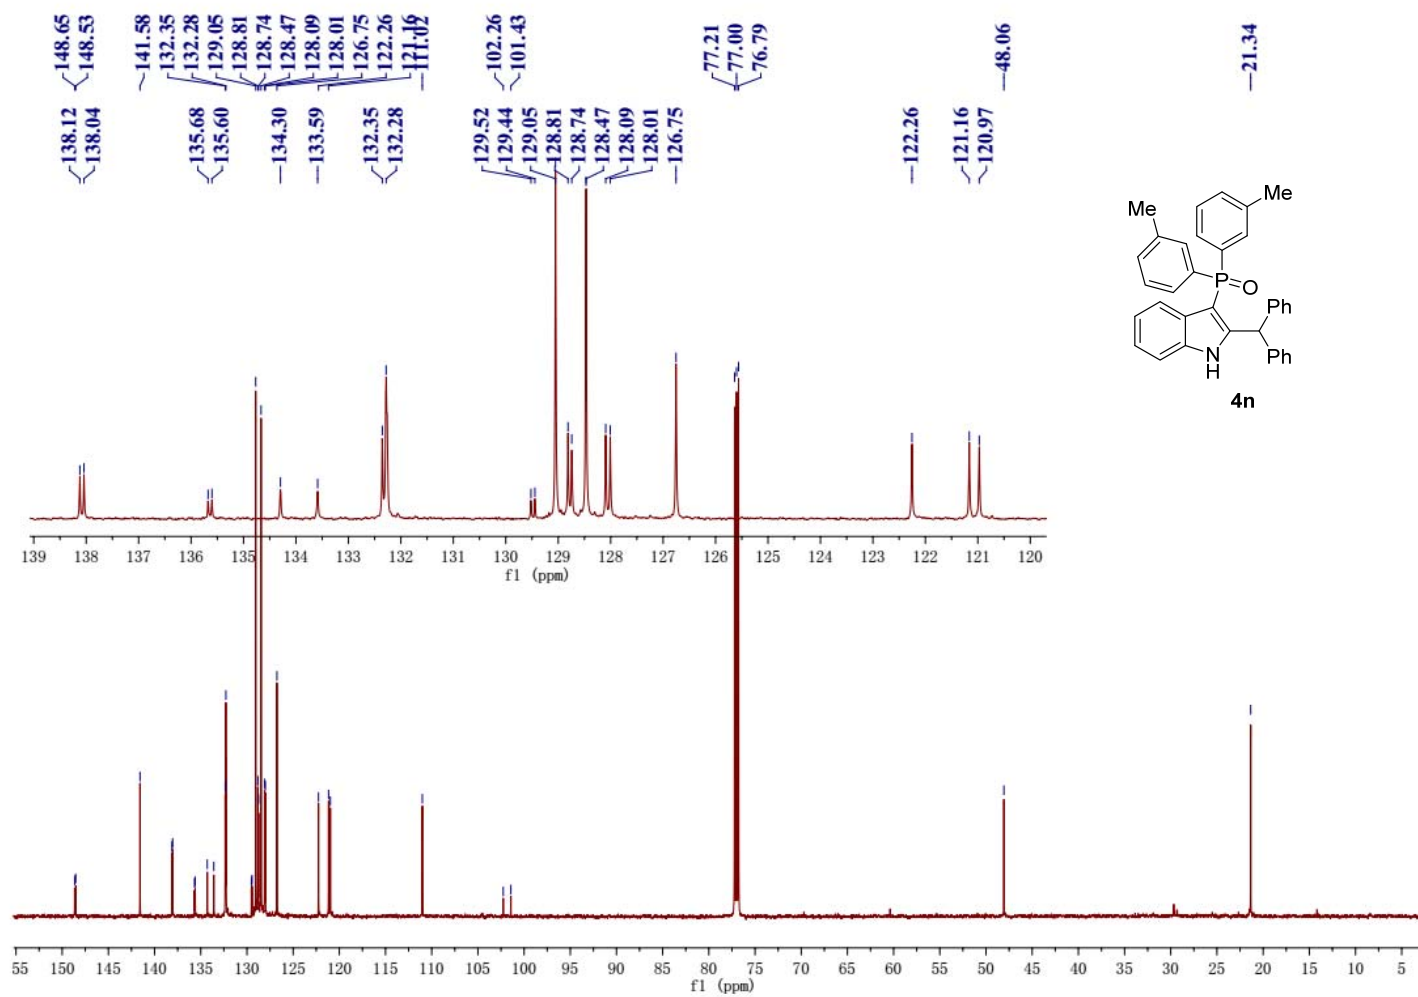

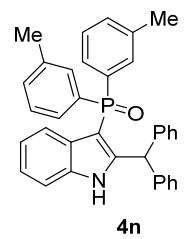

—24.31

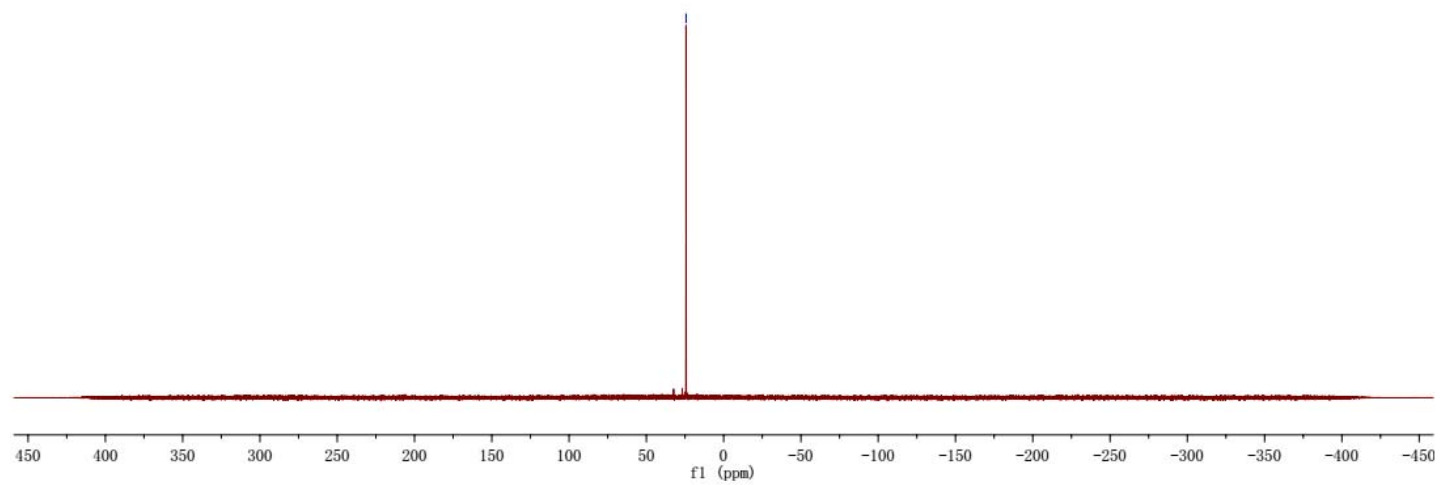

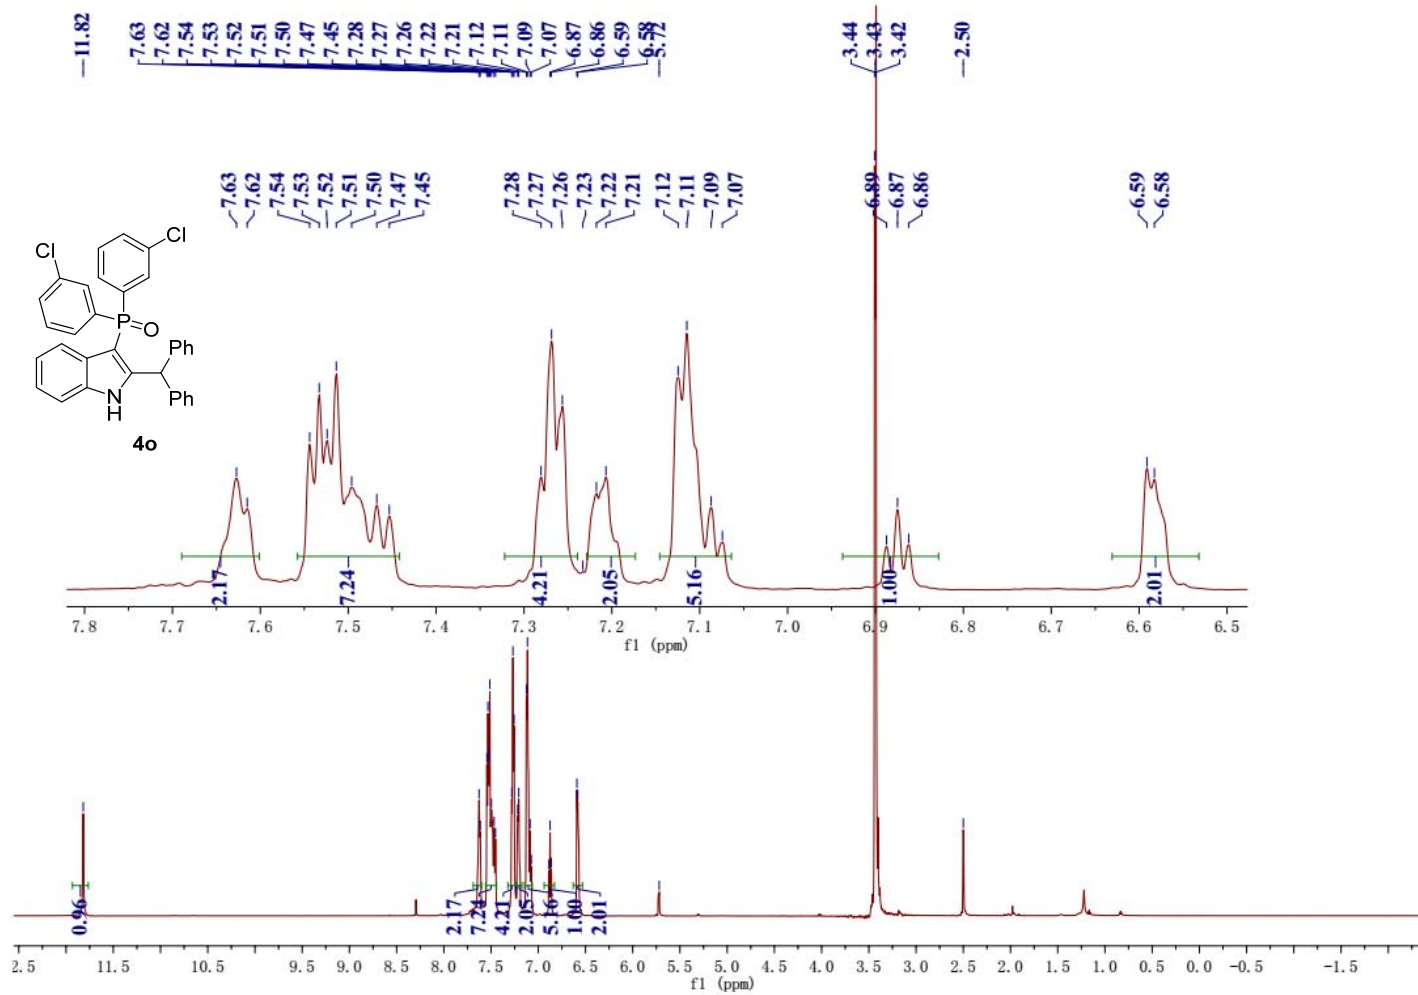



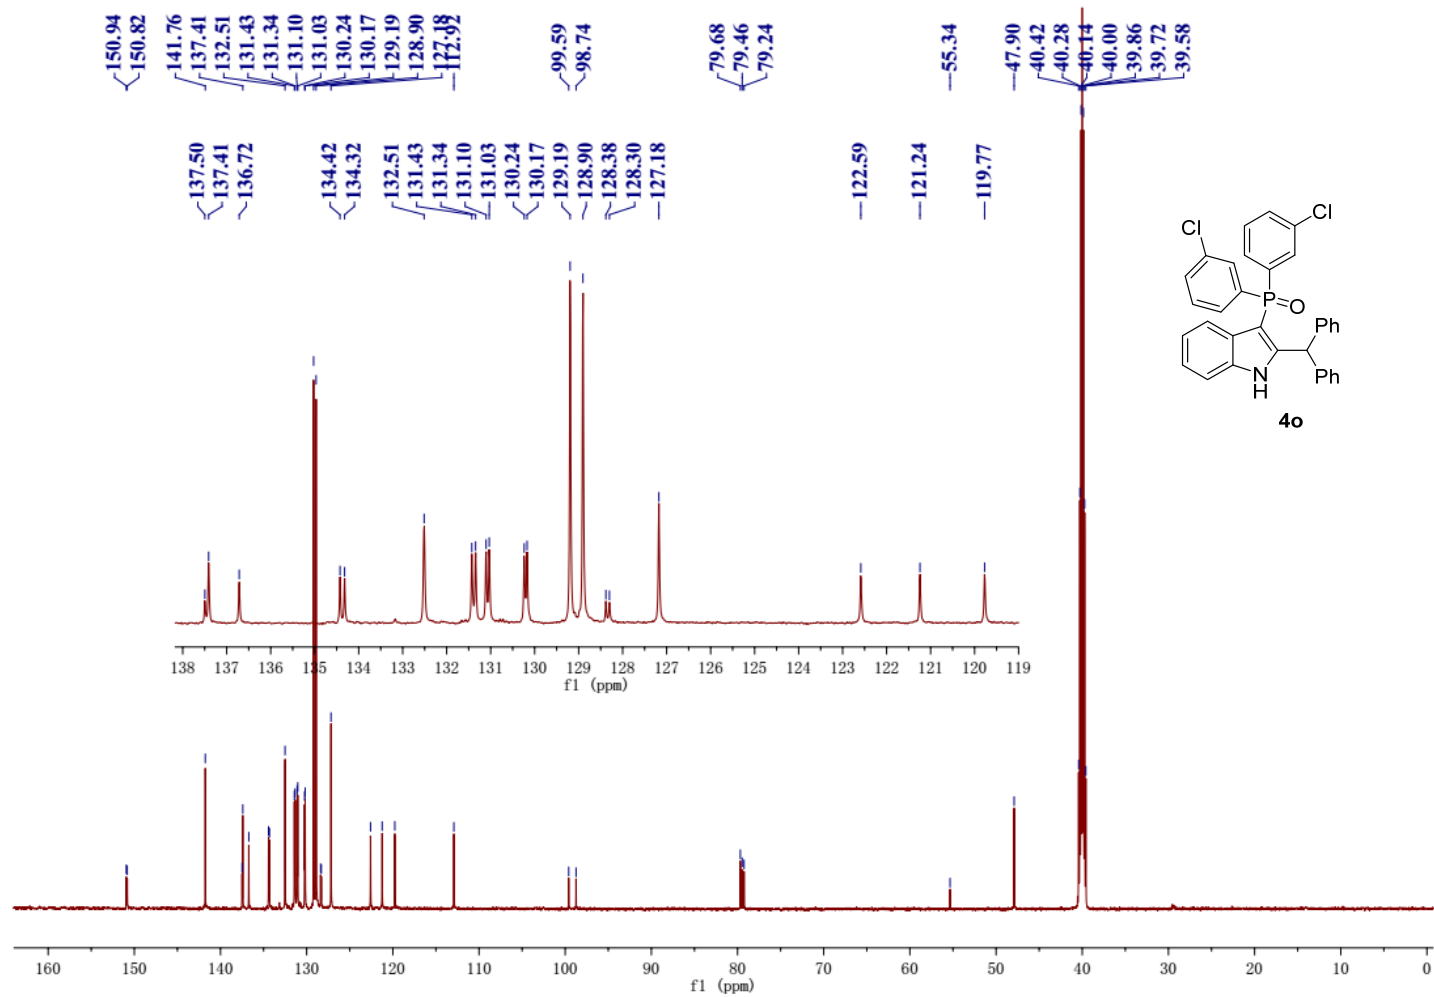



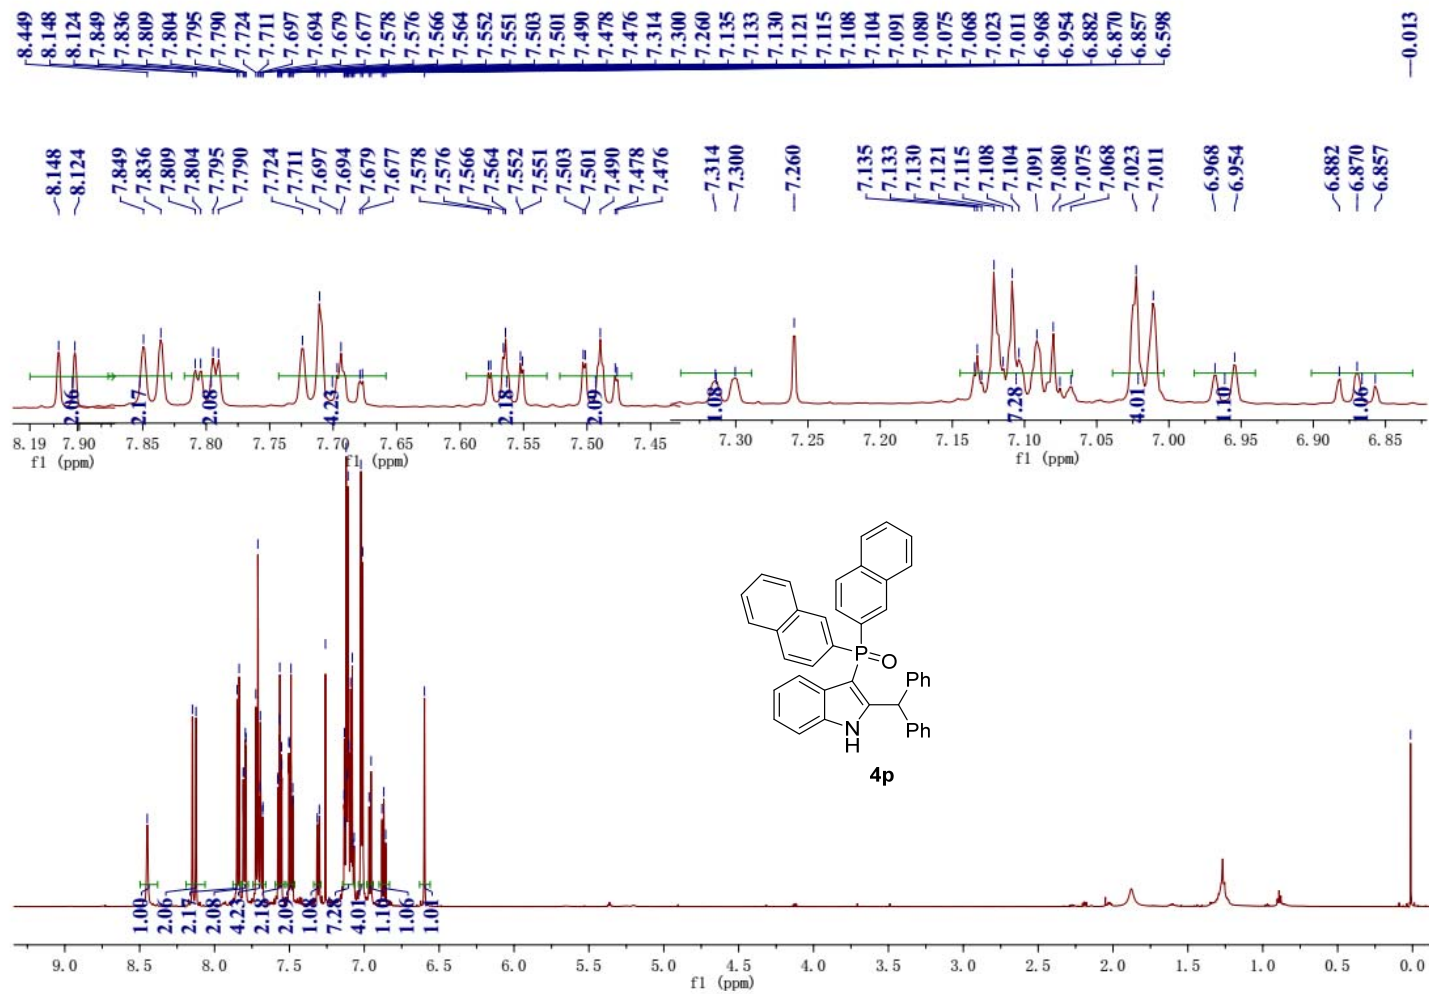

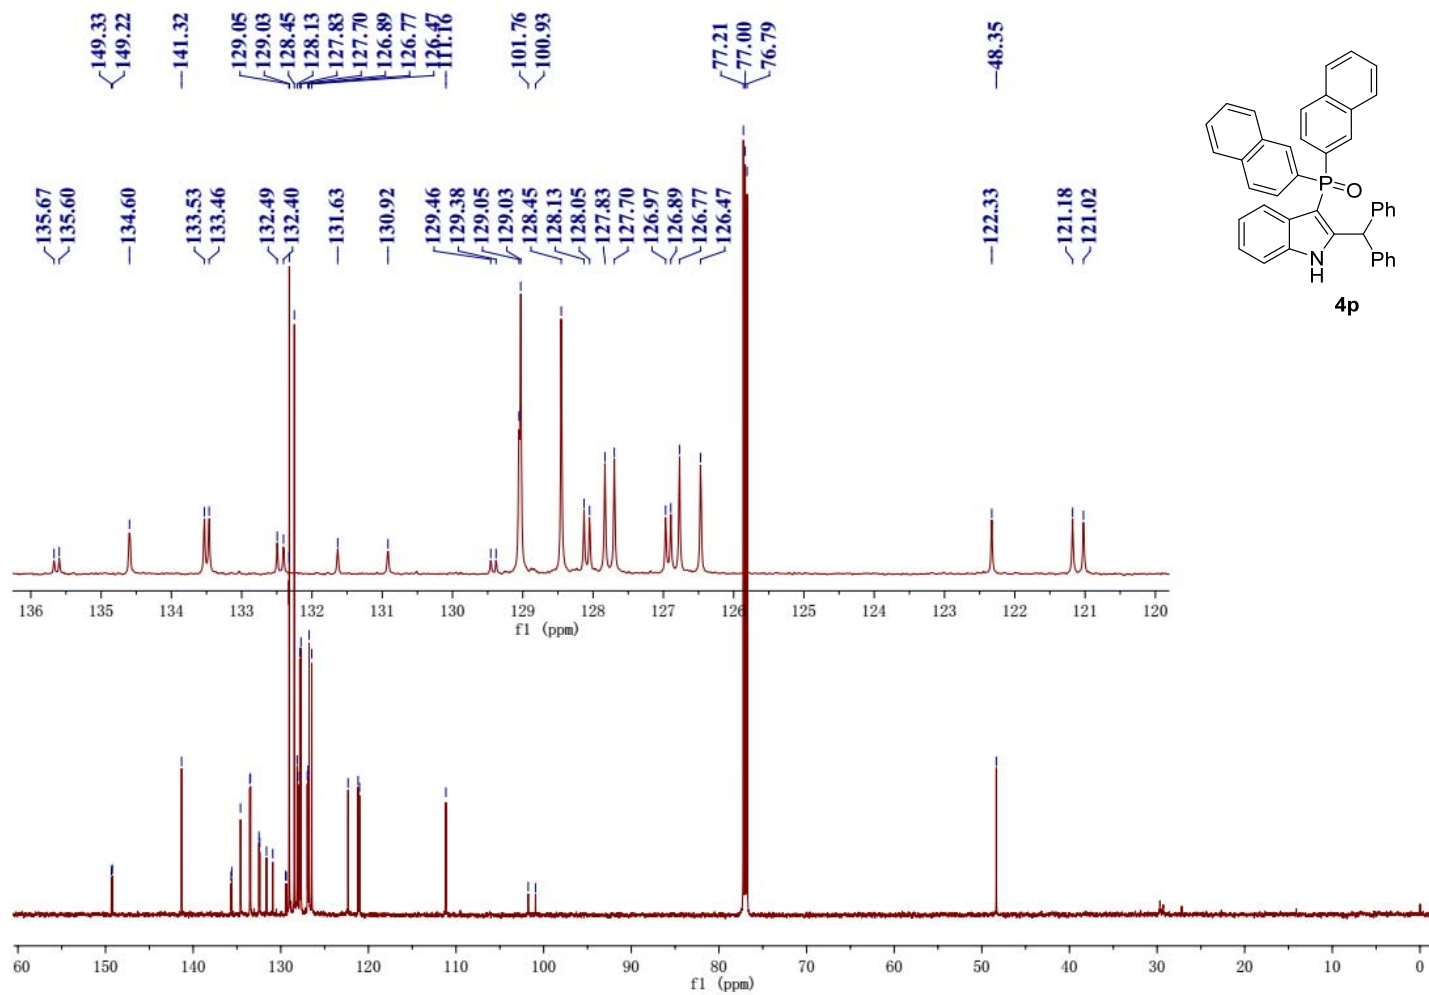

-24.05

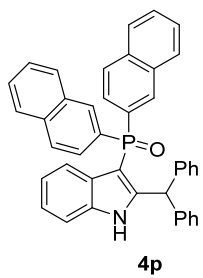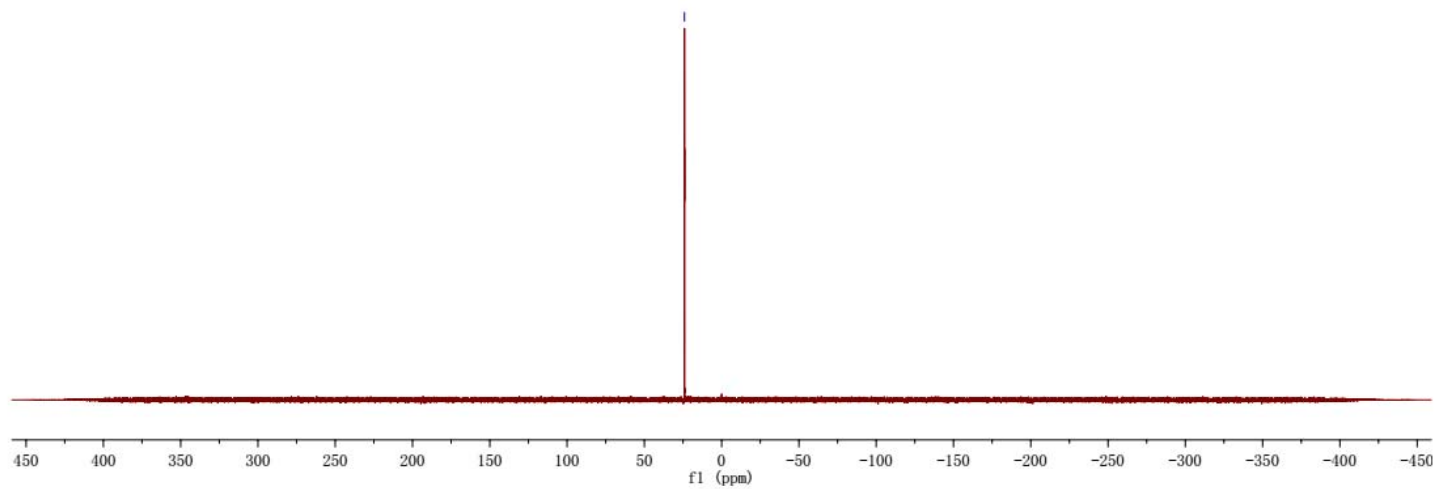

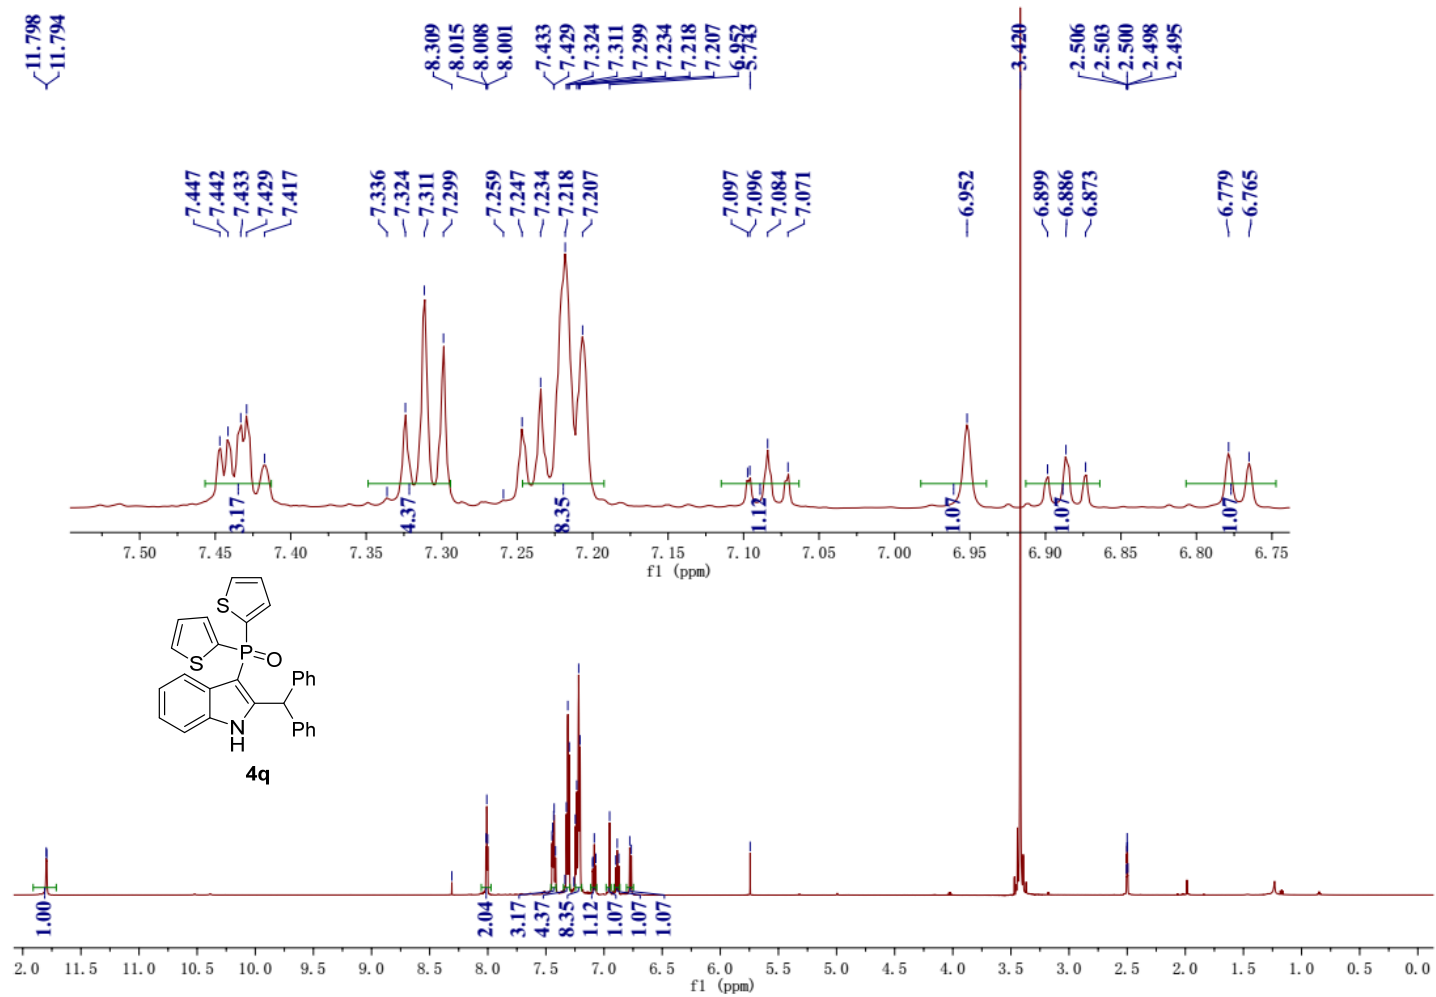

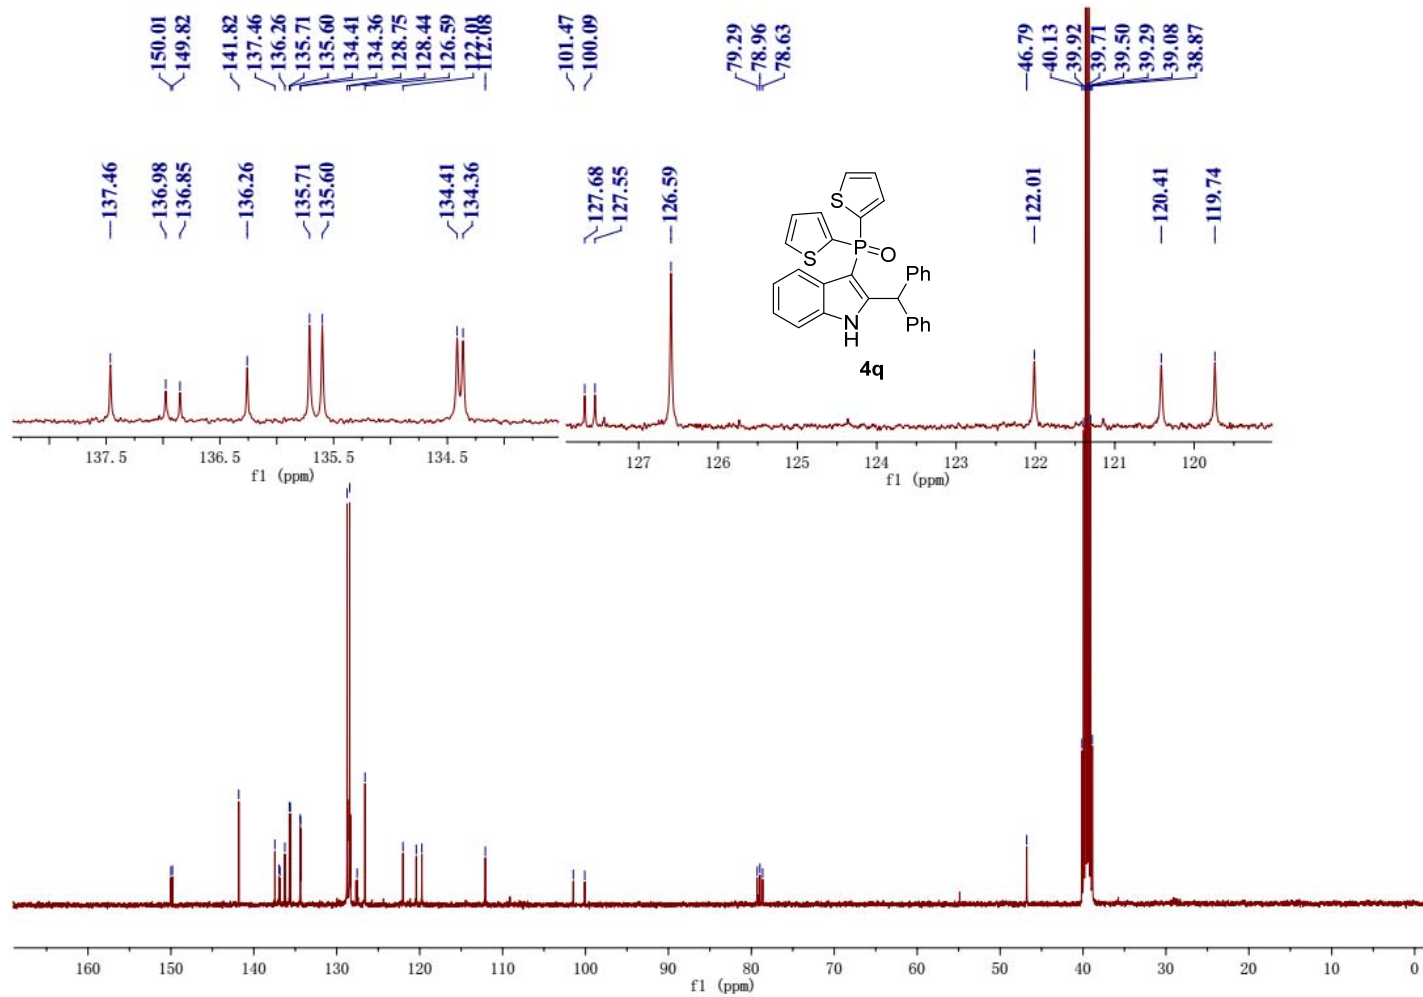

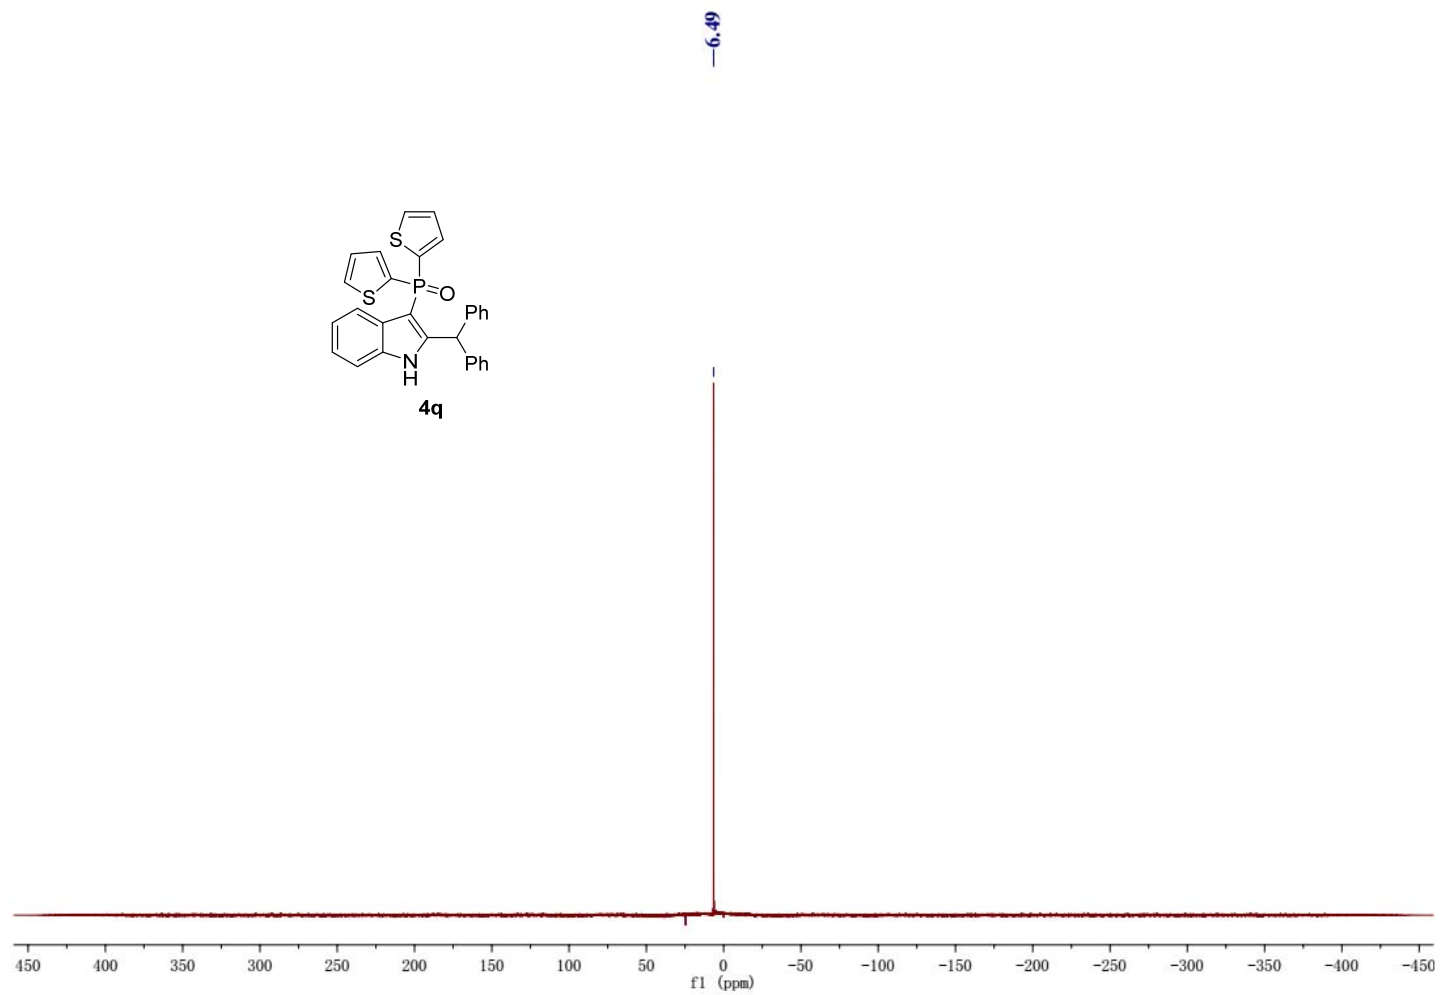

Supplement: c8ob02033g1.pdf [file c8ob02033g1.pdf]
